# Supplementary material
Source: PubMed Central journal article supplement (PMC5868419)

# Nickel-Catalyzed Enantioselective Cross-Coupling of *N*-Hydroxyphthalimide Esters with Vinyl Bromides

Naoyuki Suzuki<sup>‡</sup>, Julie L. Hofstra<sup>‡</sup>, Kelsey E. Poremba, and Sarah E. Reisman\*

*The Warren and Katharine Schlinger Laboratory for Chemistry and Chemical Engineering  
Division of Chemistry and Chemical Engineering, California Institute of Technology, Pasadena, California 91125*

*\*reisman@caltech.edu*

## Supporting Information

### Table of Contents

|                                                              |      |
|--------------------------------------------------------------|------|
| 1. Materials, Methods, and Abbreviations.....                | S2   |
| 2. Nickel(II) Complex Preparation .....                      | S3   |
| 3. Large Scale Preparation of TDAE .....                     | S7   |
| 4. Optimization of Reaction Parameters .....                 | S11  |
| 5. Substrate Preparation .....                               | S12  |
| a. NHP Esters .....                                          | S12  |
| b. Vinyl Bromides .....                                      | S21  |
| 6. Vinyl Bromide-NHP Ester Cross-Coupling .....              | S25  |
| a. Reaction on 0.2 mmol scale.....                           | S25  |
| b. Assignment of Absolute Stereochemistry .....              | S26  |
| c. Images of Reaction Setup.....                             | S26  |
| d. Characterization of Reaction Products .....               | S27  |
| e. Comparison of Benzyl Cl and NHP Ester %ee Values .....    | S60  |
| 7. References .....                                          | S61  |
| 8. Chiral SFC Traces .....                                   | S62  |
| 9. X-ray Coordinate Tables for <b>4b</b> .....               | S90  |
| 10. <sup>1</sup> H NMR and <sup>13</sup> C NMR Spectra ..... | S101 |

## 1. Materials and Methods

Unless otherwise stated, reactions were performed under a nitrogen atmosphere using freshly dried solvents. Tetrahydrofuran (THF), methylene chloride ( $\text{CH}_2\text{Cl}_2$ ), diethyl ether ( $\text{Et}_2\text{O}$ ), and toluene (PhMe) were dried by passing through activated alumina columns. Trimethylsilyl chloride (TMSCl) was distilled over calcium hydride. Trimethylsilyl bromide (TMSBr) and anhydrous dimethylacetamide (DMA) were purchased from Aldrich and stored in the glovebox. Manganese powder (-325 mesh, 99.3%) was purchased from Alfa Aesar. Zinc dust (97.5%) and nickel(II) chloride ( $\text{NiCl}_2$ ) were purchased from Strem. Tetrakis(dimethylamino)ethylene (TDAE) was purchased from TCI and stored in the glovebox. Unless otherwise stated, chemicals were used as received. All reactions were monitored by thin-layer chromatography (TLC) using EMD/Merck silica gel 60 F254 pre-coated plates (0.25 mm) and were visualized by ultraviolet (UV) light or with cerium ammonium molybdate (CAM) staining. Flash column chromatography was performed as described by Still et al.<sup>1</sup> using silica gel (230-400 mesh) purchased from Silicycle or 10%  $\text{AgNO}_3$  doped silica gel (+230 mesh) purchased from Sigma Aldrich. Optical rotations were measured on a Jasco P-2000 polarimeter using a 100 mm path-length cell at 589 nm.  $^1\text{H}$  and  $^{13}\text{C}$  NMR spectra were recorded on a Bruker Avance III HD with Prodigy cryoprobe (at 400 MHz and 101 MHz, respectively), a Varian 400 MR (at 400 MHz and 101 MHz, respectively), or a Varian Inova 500 (at 500 MHz and 126 MHz, respectively).  $^1\text{H}$  and  $^{19}\text{F}$  NMR spectra were also recorded on a Varian Inova 300 (at 300 MHz and 282 MHz, respectively). NMR data is reported relative to internal  $\text{CHCl}_3$  ( $^1\text{H}$ ,  $\delta = 7.26$ ),  $\text{CDCl}_3$  ( $^{13}\text{C}$ ,  $\delta = 77.1$ ),  $\text{C}_6\text{F}_6$  ( $^{19}\text{F}$ ,  $\delta = -164.9$ ),  $\text{CH}_3\text{C}_6\text{D}_5$  ( $^1\text{H}$ ,  $\delta = 2.09$ ), and  $\text{CD}_3\text{C}_6\text{D}_5$  ( $^{13}\text{C}$ ,  $\delta = 20.4$ ). Data for  $^1\text{H}$  NMR spectra are reported as follows: chemical shift ( $\delta$  ppm) (multiplicity, coupling constant (Hz), integration). Multiplicity and qualifier abbreviations are as follows: s = singlet, d = doublet, t = triplet, q = quartet, m = multiplet. IR spectra were recorded on a Perkin Elmer Paragon 1000 spectrometer and are reported in frequency of absorption ( $\text{cm}^{-1}$ ). Analytical chiral SFC was performed with a Mettler SFC supercritical  $\text{CO}_2$  chromatography system with Chiralcel AD-H, OD-H, AS-H, OB-H, and OJ-H columns (4.6 mm x 25 cm). LRMS were obtained using an Agilent 1290 Infinity/6140 Quadrupole system (LC-MS) or an Agilent 7890A GC/5975C VL MSD system (GC-MS). HRMS were acquired from the Caltech Mass Spectral Facility using fast-atom bombardment (FAB), electrospray ionization (ESI-TOF), or electron impact (EI). X-ray diffraction and elemental analysis (EA) were performed at the Caltech X-ray Crystal Facility.

### Commonly Used Abbreviations:

**ee** – enantiomeric excess; **EA** – elemental analysis; **Et<sub>2</sub>O** – diethyl ether; **EtOAc** – ethyl acetate; **FTIR** – Fourier transform infrared; **HRMS** – high-resolution mass spectrometry; **IPA** – isopropanol; **LRMS** – low-resolution mass spectrometry; **m.p.** – melting point; **NHP** – N-hydroxyphthalimide; **NMR** – nuclear magnetic resonance; **R<sub>f</sub>** – retention factor; **SFC** – supercritical fluid chromatography; **TDAE** – tetrakis(dimethylamino)ethylene

## 2. Nickel(II) Complex Preparation

### Bis((3*aR*,8*aS*)-3*a*,8*a*-dihydro-8*H*-indeno[1,2-*d*]oxazol-2-yl)methane (**S1**)

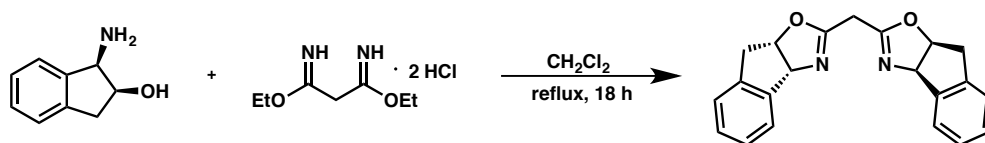

According to a procedure by Snyder and coworkers,<sup>2</sup> the (1*R*,2*S*)-(+)-*cis*-1-amino-2-indanol (4.70 g, 31.5 mmol, 2.1 equiv) and diethyl malonimidate dihydrochloride (3.47 g, 15 mmol, 1 equiv) were added to a flame-dried 1 L round bottom flask fitted with a reflux condenser and a magnetic stir bar, and put under an inert atmosphere (N<sub>2</sub>). Then CH<sub>2</sub>Cl<sub>2</sub> (360 mL) was added and the solution was heated at 45 °C for 18 hours. The reaction was cooled, then quenched with water (690 mL). The layers were separated, the aqueous layer was extracted with CH<sub>2</sub>Cl<sub>2</sub> (4 x 180 mL), and the combined organic layers were dried with MgSO<sub>4</sub>, filtered, and concentrated. The crude material was purified by recrystallization from cooling hot ethanol to yield 3.30 g (67% yield) of **S1** as a white solid. Spectral data matched those reported in literature.<sup>2</sup>

### (3*aR*,3*a'R*,8*aS*,8*a'S*)-2,2'-(Cyclopropane-1,1-diyl)bis(3*a*,8*a*-dihydro-8*H*-indeno[1,2-*d*]-oxazole) (**L**)

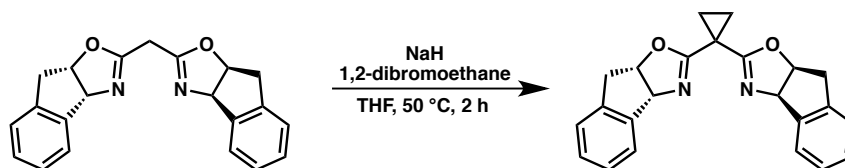

According to a procedure by Sibi and coworkers,<sup>3</sup> the bis(oxazoline) ligand **S1** (1.65 g, 5 mmol, 1 equiv) was added to a flame-dried 200 mL round bottom flask with a magnetic stir bar and put under an inert atmosphere (N<sub>2</sub>). The compound was dissolved in THF (25 mL) and cooled to 0 °C before *dry* sodium hydride (60 wt% in mineral oil, 601 mg, 15 mmol, 3 equiv) was added in

portions. *Note: Wet NaH resulted in saponification of the oxazoline, which could be removed by column chromatography (silica, 10% MeOH/CH<sub>2</sub>Cl<sub>2</sub>).* The solution was allowed to stir for 30 minutes before 1,2-dibromoethane (517  $\mu$ L, mmol, 1.2 equiv) was added dropwise over the course of 10 minutes. The reaction was warmed to 50  $^{\circ}$ C and stirred for 2 hours. *Note: Aliquots could be monitored by <sup>1</sup>H NMR to ensure complete conversion of the starting material.* The reaction was quenched with aqueous NH<sub>4</sub>Cl (25 mL) and extracted with CH<sub>2</sub>Cl<sub>2</sub> (2 x 85 mL). The combined organic layers were dried with Na<sub>2</sub>SO<sub>4</sub>, filtered, and concentrated under reduced pressure. The crude material was purified by recrystallization from cooling hot ethanol to yield 1.46 g (82% yield) of **L** as a light tan solid. Spectral data matched those reported in literature.<sup>3</sup>

**Nickel(II) bis(bromide) (3a*R*,3a'*R*,8a*S*,8a'*S*)-2,2'-(cyclopropane-1,1-diyl)bis(3a,8a-dihydro-8*H*-indeno[1,2-*d*]oxazole) (4b)**

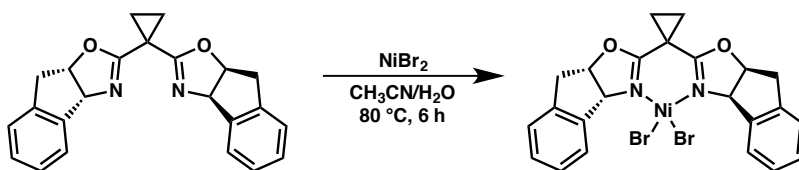

Similar to a procedure reported by Evans and coworkers,<sup>4</sup> the bis(oxazoline) ligand **L** (1.07 g, 3.0 mmol, 1 equiv) and anhydrous nickel(II) bromide (655 mg, 3.0 mmol, 1 equiv) were added to a round bottom flask equipped with a magnetic stir bar and dissolved in a mixture of acetonitrile (CH<sub>3</sub>CN, 65 mL) and water (0.75 mL). The solution was heated to 80  $^{\circ}$ C for 6 hours to afford a dark purple solution. The reaction was concentrated under reduced pressure and the obtained solid was saturated in CH<sub>2</sub>Cl<sub>2</sub>, filtered through a plug of cotton, dispensed into four 20 mL scintillation vials, and recrystallized by vapor diffusion (CH<sub>2</sub>Cl<sub>2</sub>/pentane) to afford dark purple crystals suitable for X-ray diffraction. For the isolation of **4b**, the crystals were washed with hexane, which was added by pipet and subsequently removed. The crystals were removed with a spatula, transferred to a new vial, and crushed to provide a powder. The resulting complex was dried under vacuum to yield 1.6 g (91% yield) of **4b** as a purple solid.

**m.p.** = >300  $^{\circ}$ C

**<sup>1</sup>H NMR (400 MHz, CDCl<sub>3</sub>):**  $\delta$  96.48 (s, 2H), 46.46 (s, 2H), 20.16 (d,  $J$  = 17.1 Hz, 2H), 11.67 – 10.85 (m, 6H), 10.55 (d,  $J$  = 16.6 Hz, 2H), 6.96 (s, 2H), 5.40 (s, 2H), -0.65 (s, 2H).

**FTIR (NaCl, thin film, cm<sup>-1</sup>):** 3333, 2222, 1660, 1479, 1461, 1444, 1427, 1312, 1247, 1227, 1214, 1120, 1010, 911, 859, 758, 728.



**EA:** Anal. Calc'd. for **4b**, C<sub>23</sub>H<sub>20</sub>Br<sub>2</sub>N<sub>2</sub>NiO<sub>2</sub> (%): C, 48.05; H, 3.51; N, 4.87. Found: C, 48.38; H, 3.54; N, 4.84.

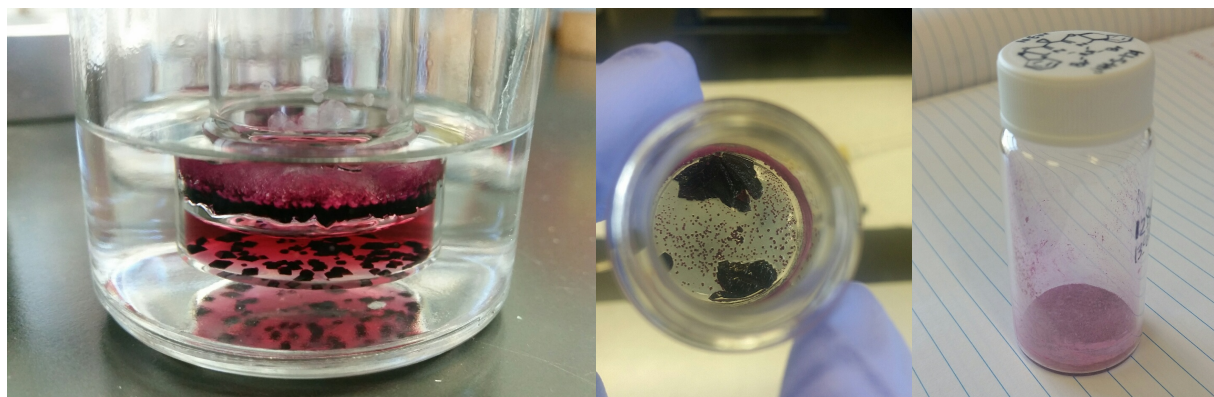

**(Left)** Crystallized **4b** following vapor diffusion. **(Center)** Large crystals of **4b**. **(Right)** The powdered form of **4b** after crushing the crystals with a spatula and drying under vacuum.

### X-Ray Structure Determination

Low-temperature diffraction data ( $\phi$ - and  $\omega$ -scans) were collected on a Bruker AXS KAPPA APEXII diffractometer coupled to a CCD detector with Mo- $K\alpha$  radiation ( $\lambda = 0.71073 \text{ \AA}$ ) from a fine-focus sealed X-ray tube. All diffractometer manipulations, including data collection integration, and scaling were carried out using the Bruker APEXII software.<sup>5</sup> Absorption corrections were applied using SADABS.<sup>6</sup> The structure was solved by intrinsic phasing using SHELXT<sup>7</sup> and refined against  $F^2$  on all data by full-matrix least squares with SHELXL-2014<sup>7</sup> using established refinement techniques.<sup>8</sup> All non-hydrogen atoms were refined anisotropically. All hydrogen atoms were included into the model at geometrically calculated positions and refined using a riding model. Compound **4b** crystallizes in the tetragonal space group  $P4_1$  with one molecule in the asymmetric unit. The structure was solved as a merohedral twin with rotation around an axis  $45^\circ$  between a and b. The twin law was defined as the matrix (0.0, 1.0, 0.0, 1.0, 0.0, 0.0, 0.0, 0.0, -1.0). The BASF parameter [0.4980(14)] gave the twin ratio as 0.50:0.50. Absolute configuration was determined by anomalous dispersion (Flack = 0.011(2)).<sup>9</sup> Crystallographic data for **4b** can be obtained free of charge from The Cambridge Crystallographic Data Centre (CCDC) via [www.ccdc.cam.ac.uk/data\\_request/cif](http://www.ccdc.cam.ac.uk/data_request/cif) under CCDC deposition number 1501744. Graphical representation of the structure with 50% probability thermal ellipsoids was generated using Mercury visualization software.

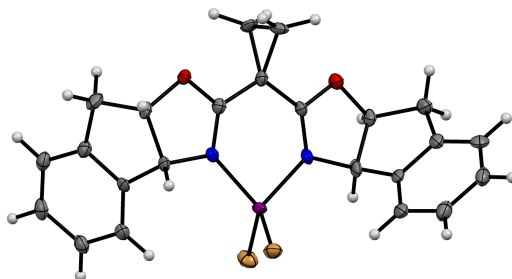

**Table S1. Crystal data and structure refinement for 4b.**

|                                      |                                                              |                       |
|--------------------------------------|--------------------------------------------------------------|-----------------------|
| Identification code                  | JLH-3-168                                                    |                       |
| Empirical formula                    | $C_{23}H_{20}Br_2N_2NiO_2$                                   |                       |
| Formula weight                       | 574.94                                                       |                       |
| Temperature                          | 100 K                                                        |                       |
| Wavelength                           | 0.71073 Å                                                    |                       |
| Crystal system                       | Tetragonal                                                   |                       |
| Space group                          | $P4_1$                                                       |                       |
| Unit cell dimensions                 | $a = 9.4823(6)$ Å                                            | $\alpha = 90^\circ$ . |
|                                      | $b = 9.4823(6)$ Å                                            | $\beta = 90^\circ$ .  |
|                                      | $c = 24.418(2)$ Å                                            | $\gamma = 90^\circ$ . |
| Volume                               | $2195.5(3)$ Å <sup>3</sup>                                   |                       |
| Z                                    | 4                                                            |                       |
| Density (calculated)                 | 1.739 Mg/m <sup>3</sup>                                      |                       |
| Absorption coefficient               | 4.546 mm <sup>-1</sup>                                       |                       |
| F(000)                               | 1144                                                         |                       |
| Crystal size                         | 0.31 x 0.27 x 0.14 mm <sup>3</sup>                           |                       |
| Theta range for data collection      | 0.834 to 38.918°.                                            |                       |
| Index ranges                         | $-16 \leq h \leq 16, -16 \leq k \leq 16, -42 \leq l \leq 43$ |                       |
| Reflections collected                | 113308                                                       |                       |
| Independent reflections              | 12464 [R(int) = 0.0431]                                      |                       |
| Completeness to theta = 25.242°      | 100.0 %                                                      |                       |
| Absorption correction                | Semi-empirical from equivalents                              |                       |
| Max. and min. transmission           | 0.7476 and 0.5466                                            |                       |
| Refinement method                    | Full-matrix least-squares on F <sup>2</sup>                  |                       |
| Data / restraints / parameters       | 12464 / 1 / 272                                              |                       |
| Goodness-of-fit on F <sup>2</sup>    | 1.056                                                        |                       |
| Final R indices [ $I > 2\sigma(I)$ ] | R1 = 0.0470, wR2 = 0.1114                                    |                       |
| R indices (all data)                 | R1 = 0.0580, wR2 = 0.1168                                    |                       |
| Absolute structure parameter         | 0.011(2)                                                     |                       |
| Extinction coefficient               | n/a                                                          |                       |
| Largest diff. peak and hole          | 2.381 and -1.019 e.Å <sup>-3</sup>                           |                       |

### 3. Large Scale Preparation of TDAE

#### *N,N,N',N'*-tetramethylformamidinium chloride (S2)

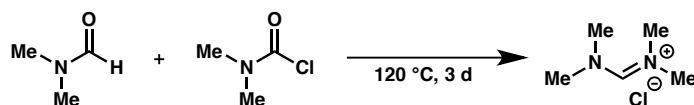

According to a procedure by Bestmann and coworkers,<sup>10</sup> the dimethylcarbamyl chloride (500 mmol, 46 mL, 1 equiv) and anhydrous dimethylformamide (DMF, 1 mol, 77 mL, 2 equiv) were added under an inert atmosphere ( $\text{N}_2$ ) to a flame-dried 500 mL round bottom flask fitted with a reflux condenser and a magnetic stir bar. The solution was heated to 120 °C for 3 days, during which the reaction remained a homogeneous solution and turned dark brown in color. The reaction was removed from the stir plate and allowed to cool to room temperature, which initiated crystallization of the formamidinium chloride salt. Anhydrous diethyl ether (200 mL) was added to the crude reaction, swirled vigorously, quickly transferred to a fritted glass funnel, and filtered under a cone of argon gas. The crystals were quickly transferred to a round bottom flask and dried overnight under vacuum to yield 60.3 g (88% yield) of *N,N,N',N'* tetramethylformamidinium chloride as a tan solid. The product is *extremely* hygroscopic, thus it was stored in the glovebox away from ambient moisture.

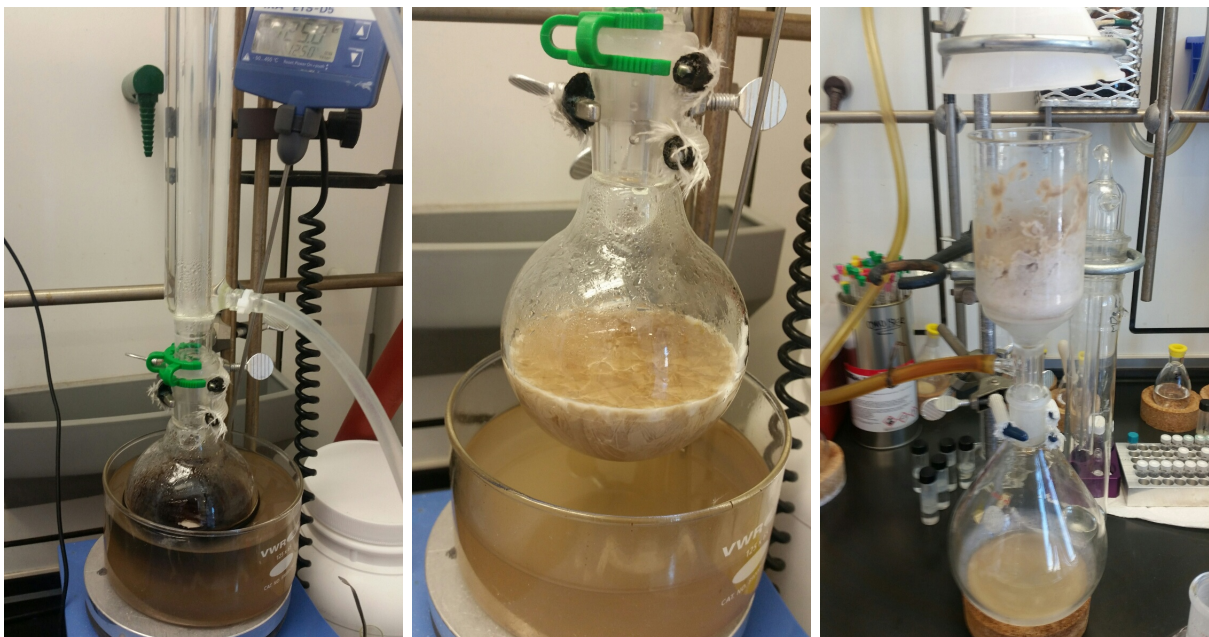

**(Left)** Reaction after heating for 3 days. **(Center)** Precipitated salt after cooling the reaction flask. **(Right)** Filtering the salt under a flow of argon.

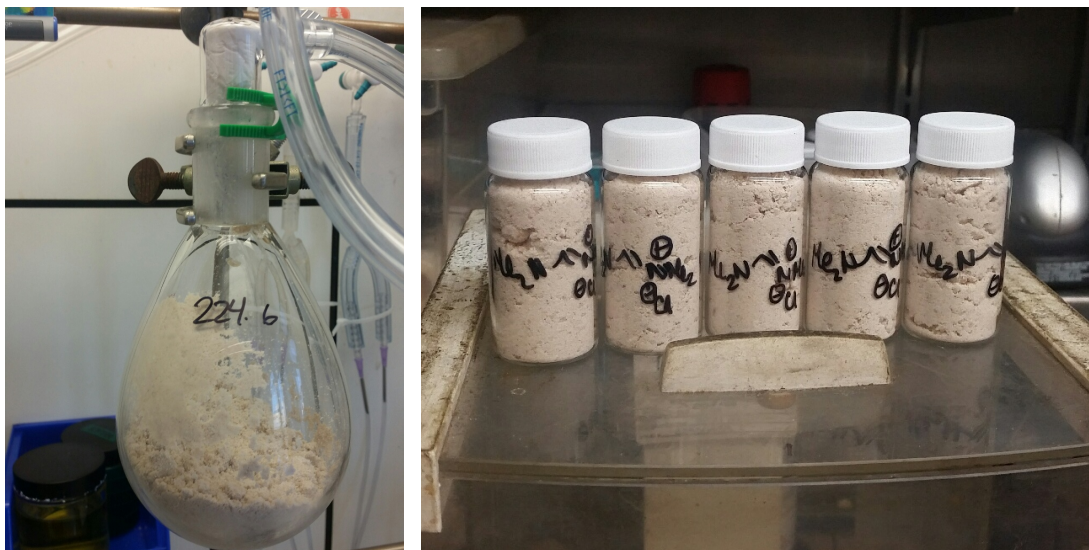

(Left) Drying the salt under vacuum. (Right) Dried formamidinium salt stored in the glovebox.

### Tris(dimethylamino)methane (S3)

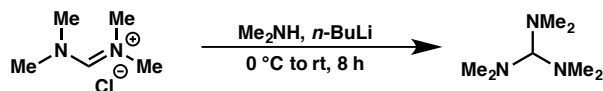

Similar to a procedure by Wasserman and coworkers,<sup>11</sup> anhydrous diethyl ether (500 mL) and dimethylamine (440 mL, 2 M in THF, 369 mmol, 2 equiv) were added under an inert atmosphere (N<sub>2</sub>) to a flame-dried 2 L round bottom flask with a magnetic stir bar. The reaction was cooled to -78 °C and *n*-butyllithium (*n*-BuLi, 210 mL, 2.5 M in hexane, 295 mmol, 1.2 equiv) was added via cannula under a stream of N<sub>2</sub>, resulting in a pink homogenous solution. The reaction was warmed to room temperature and stirred for 30 min, forming a white slurry. The flask was cooled to 0 °C, the *N,N,N',N'*-tetramethylformamidinium chloride (60.3 g, 246 mmol, 1 equiv) was quickly added, and the reaction was warmed to room temperature and stirred overnight for 8 h forming a light brown slurry. The flask was fitted with a distillation head and reflux condenser, and the solvent was distilled off into a 2 L receiving flask under ambient pressure. The flask was cooled and a new collection flask was added along with a vacuum regulator. The desired product was distilled out of the crude residue by slowly decreasing the pressure of the vacuum regulator to 1 mm Hg while increasing the oil bath temperature upwards of 100 °C. The liquid collected in the trap was THF, whereas the liquid collected in the receiving flask yielded 45.2 g (71% yield) of tris(dimethylamino)methane as a colorless oil. <sup>1</sup>H NMR (300 MHz, CDCl<sub>3</sub>): δ 3.02 (s, 1H), 2.29 (s, 18H). <sup>13</sup>C NMR (101 MHz, CDCl<sub>3</sub>): δ 100.3, 41.3.



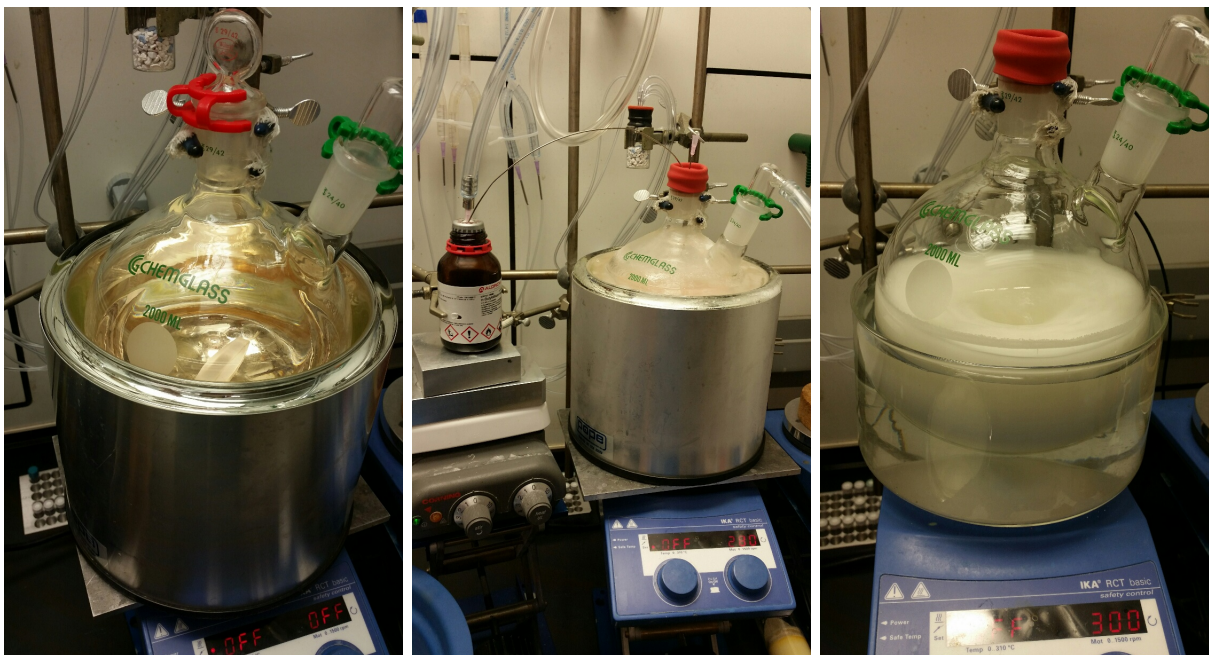

(Left) Dimethylamine in THF added to 500 mL of diethyl ether. (Center) Reaction flask cooled to  $-78\text{ }^{\circ}\text{C}$  and *n*-butyllithium solution added via cannula. (Right) Warming the reaction to room temperature forms a white slurry.

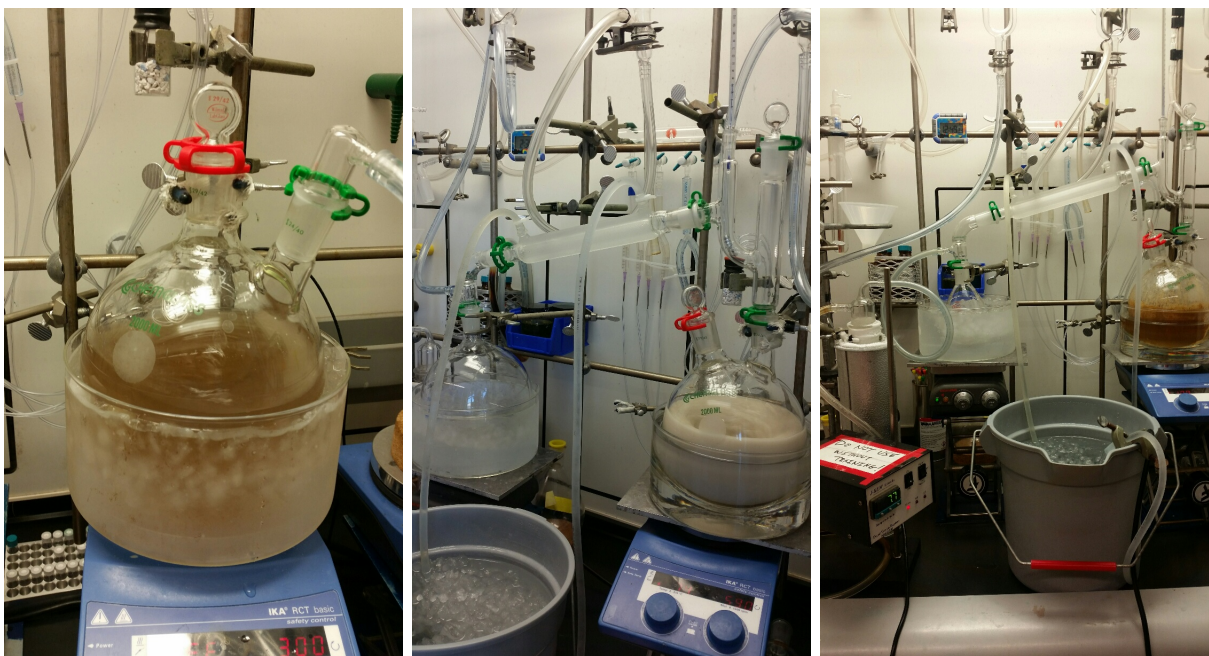

(Left) Formamidinium chloride added to lithium dimethylamide at  $0\text{ }^{\circ}\text{C}$ , followed by warming to room temperature. (Center) Fractional distillation to remove solvent. (Right) Vacuum distillation to afford tris(dimethylamino)methane; an ice bath is used to cool the receiving flask.

### Tetrakis(dimethylamino)ethylene (S4)

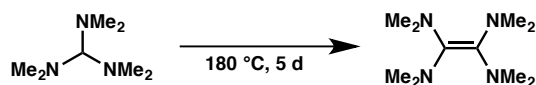

Similar to a procedure by Murphy and coworkers,<sup>12</sup> the tris(dimethylamino)methane was added to a 250 mL flame-dried round bottom flask fitted with a reflux condenser and a magnetic stir bar, and sparged with argon for 15 minutes. The reaction was heated to reflux for 5 days at 180 °C while being maintained under a steady stream of dry argon. The reaction was cooled to room temperature and remained under an argon atmosphere while the flask was fitted with a distillation apparatus (also under an argon atmosphere). The product was purified via fractional distillation under reduced pressure with the aid of a Vigreux column. The remaining tris(dimethylamino)methane starting material was collected in the first fraction at 1 mm Hg and 30 °C as a colorless oil. When a yellow-green oil began to collect in the receiving flask, the fractions were exchanged and the desired product was collected at 1 mm Hg and 65 °C to yield 19.4 g (62% yield) of tetrakis(dimethylamino)ethylene as a yellow-green oil. Spectra matched those reported in literature<sup>12</sup> and also matched a sample of the commercially available material. The reagent was stored under inert atmosphere (N<sub>2</sub>) in the glovebox. <sup>1</sup>H NMR (400 MHz, C<sub>6</sub>D<sub>5</sub>CD<sub>3</sub>): δ 2.57 (s, 24H). <sup>13</sup>C NMR (101 MHz, C<sub>6</sub>D<sub>5</sub>CD<sub>3</sub>): δ 131.5, 41.2.

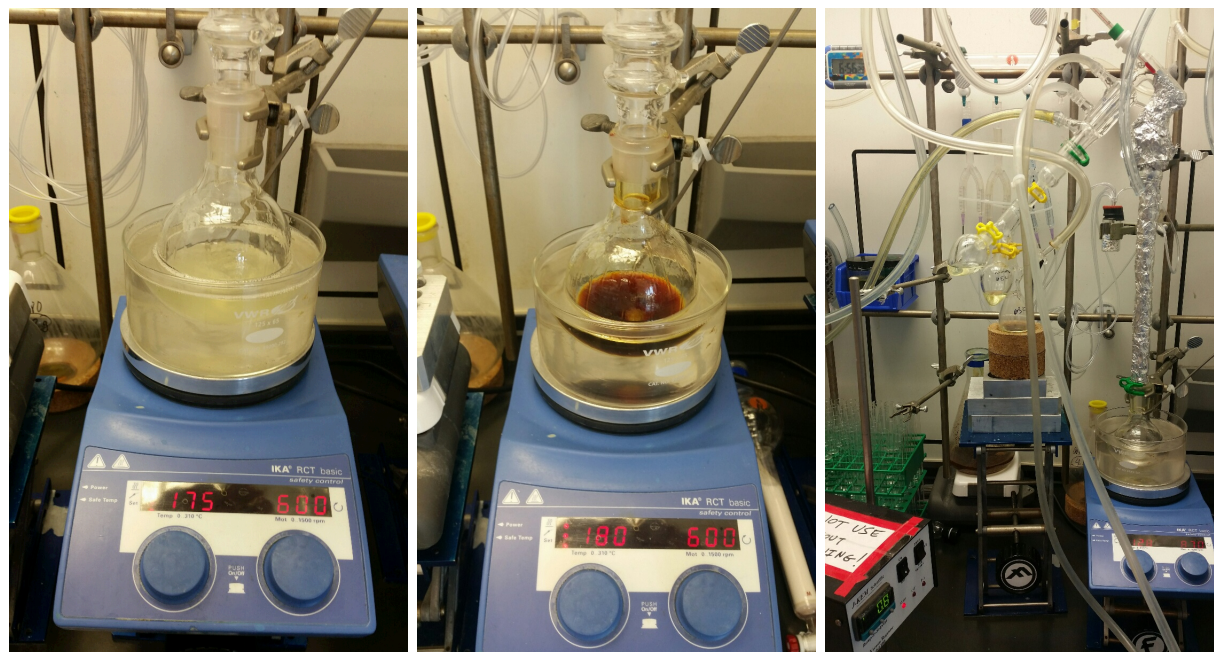

**(Left)** Reaction heated to 180 °C. **(Center)** Reaction after 5 days at 180 °C. **(Right)** Fractional vacuum distillation to afford tetrakis(dimethylamino)ethylene.



#### 4. Optimization of Reaction Parameters (Table 1)

On a bench-top to a 1 dram vial equipped with a stir bar was added vinyl bromide **1a** (43 mg, 0.2 mmol, 1 equiv), NHP ester **2** (59 mg, 0.2 mmol, 1 equiv), **4a** or **4b** (0.00–0.02 mmol, 0.00–0.10 equiv), reductant (if Mn or Zn, 0.6 mmol, 3 equiv), and sodium iodide (0.0–15.0 mg, 0.0–0.1 mmol, 0.0–0.5 equiv). Under an inert atmosphere in a glovebox, the vial was charged with DMA (0.2 mL, 1.0 M), the reagents were stirred until dissolved, and then cooled to the desired temperature. The reductant was then added (if tetrakis(dimethylamino)ethylene, TDAE, 0.3–0.6 mmol, 70–140  $\mu$ L, 1.5–3 equiv). The reaction was stirred for 10 minutes before the trimethylsilyl chloride (TMSCl) or trimethylsilyl bromide (TMSBr) was added (0.0–0.2 mmol, 0–1 equiv). The vial was sealed with a screw cap and stirred for 16 hours. As the reaction proceeds, the TDAE salts begin to precipitate, forming an orange slurry. The vial was removed from the glovebox and dibenzyl ether was added as an internal standard. The solution was quenched with aqueous HCl, extracted with Et<sub>2</sub>O, dried with MgSO<sub>4</sub>, and concentrated to afford the crude reaction mixture, which was analyzed by <sup>1</sup>H NMR and chiral phase SFC to provide the reaction yield and enantioselectivity of the desired product.

Table S2. Other Optimization Controls

Reaction scheme: **1a** + **2**  $\xrightarrow[\text{DMA, } -7\text{ }^\circ\text{C, 16 h}]{\text{4b (10 mol \%), TDAE (1.5 equiv), Nal (0.5 equiv), TMSBr (1.0 equiv)}}$  **3a**

| Entry | Deviation from Standard Conditions <sup>a</sup>            | yield (%) <sup>b</sup> | ee (%) <sup>c</sup> |
|-------|------------------------------------------------------------|------------------------|---------------------|
| 1     | ---                                                        | 80                     | 96                  |
| 2     | no Nal                                                     | 68                     | 95                  |
| 3     | no TDAE                                                    | 0                      | --                  |
| 4     | no L-NiBr <sub>2</sub> ( <b>4b</b> )                       | 0                      | --                  |
| 5     | TMSCl instead of TMSBr                                     | 67                     | 95                  |
| 6     | 0.2 M instead of 1.0 M                                     | 82                     | 96                  |
| 7     | MeCN instead of DMA                                        | 30                     | 99                  |
| 8     | propylene carbonate instead of DMA                         | 43                     | 95                  |
| 9     | + 50 mol % BHT <sup>d</sup>                                | 80                     | 96                  |
| 10    | + 50 mol % DHA <sup>e</sup>                                | 73                     | 95                  |
| 11    | NiBr <sub>2</sub> ·diglyme and dtbbpy instead of <b>4b</b> | 59                     | --                  |

<sup>a</sup>Reactions conducted on 0.2 mmol scale under N<sub>2</sub> with 1.0 equiv of each electrophile. <sup>b</sup>Determined by <sup>1</sup>H NMR versus an internal standard. <sup>c</sup>Determined by SFC using a chiral stationary phase. <sup>d</sup>3,5-di-*tert*-butyl-4-hydroxytoluene. <sup>e</sup>9,10-dihydroanthracene. PMP = *para*-methoxyphenyl

## 5. Substrate Preparation (Note: These conditions are not fully optimized.)

### a. General Procedure 1: NHP Ester Synthesis

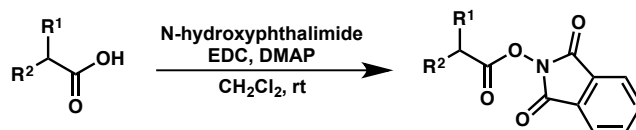

To a round bottom flask equipped with a magnetic stir bar was added the carboxylic acid (1.0 equiv), N-hydroxyphthalimide (1.0 equiv), and 4-dimethylaminopyridine (DMAP, 0.10 equiv). The reagents were dissolved in CH<sub>2</sub>Cl<sub>2</sub> (0.2 M) and the N-(3-dimethylaminopropyl)-N-ethylcarbodiimide (EDC, 1.1 equiv) was added. The reaction continued to stir overnight at room temperature. The crude reaction was concentrated to afford a thick oil, which was purified by column chromatography (silica, EtOAc/hexane or CH<sub>2</sub>Cl<sub>2</sub>) to afford the desired product.

### 1,3-dioxoisindolin-2-yl 2-phenylpropanoate (2)

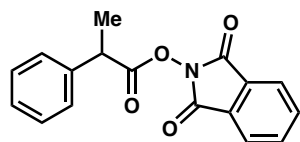

Prepared from 2-phenylpropanoic acid (5.0 g, 33.3 mmol) according to General Procedure 1. The crude residue was purified by filtering through a plug of silica with CH<sub>2</sub>Cl<sub>2</sub> as the eluent to yield 8.7 g (88% yield) of **2** as a white solid.

$R_f$  = 0.28 (silica gel, 20% EtOAc/hexane, UV).

m.p. = 62–64 °C

<sup>1</sup>H NMR (400 MHz, CDCl<sub>3</sub>): δ 7.85 (d, *J* = 5.5, 3.1 Hz, 2H), 7.76 (dd, *J* = 5.5, 3.1 Hz, 2H), 7.43 – 7.37 (m, 4H), 7.37 – 7.30 (m, 1H), 4.13 (q, *J* = 7.2 Hz, 1H), 1.68 (d, *J* = 7.2 Hz, 3H).

<sup>13</sup>C NMR (101 MHz, CDCl<sub>3</sub>): δ 170.9, 161.9, 138.5, 134.9, 129.02, 128.98, 127.9, 127.7, 124.0, 43.1, 19.1.

FTIR (NaCl, thin film, cm<sup>-1</sup>): 1810, 1785, 1743, 1466, 1453, 1358, 1186, 1123, 1043, 1028, 877, 695.

HRMS (ESI-TOF, *m/z*): calc'd for C<sub>17</sub>H<sub>13</sub>NO<sub>4</sub> [M+H]<sup>+</sup>: 296.0923; found: 296.0903.

### 1,3-dioxoisindolin-2-yl 2-(4-methoxyphenyl)propanoate (6a)

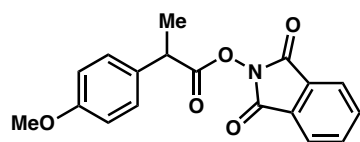

Prepared from 2-(4-methoxyphenyl)propanoic acid (500 mg, 2.77 mmol) according to General Procedure 1. The crude residue was purified by filtering through a plug of silica with 30%



EtOAc/hexane as the eluent to yield 671 mg (74% yield) of **6a** as a white solid.

$R_f$  = 0.22 (silica gel, 20% EtOAc/hexane, UV).

m.p. = 91–92 °C

$^1\text{H NMR}$  (400 MHz,  $\text{CDCl}_3$ ):  $\delta$  7.86 (dd,  $J$  = 5.5, 3.1 Hz, 2H), 7.77 (dd, 2H), 7.33 (d,  $J$  = 8.7 Hz, 2H), 6.92 (d,  $J$  = 8.8 Hz, 2H), 4.08 (q,  $J$  = 7.2 Hz, 1H), 3.81 (s, 3H), 1.65 (d,  $J$  = 7.2 Hz, 3H).

$^{13}\text{C NMR}$  (101 MHz,  $\text{CDCl}_3$ ):  $\delta$  171.1, 162.0, 159.2, 134.9, 130.5, 129.0, 128.8, 124.0, 114.4, 55.4, 42.2, 19.2.

FTIR (NaCl, thin film,  $\text{cm}^{-1}$ ): 1810, 1784, 1743, 1611, 1513, 1467, 1371, 1249, 1185, 1123, 1045, 1033, 878, 832, 696.

HRMS (ESI-TOF,  $m/z$ ): calc'd for  $\text{C}_{18}\text{H}_{15}\text{NO}_5$   $[\text{M}+\text{H}]^+$ : 326.1028; found: 326.1022.

### 1,3-dioxoisindolin-2-yl 2-(4-(trifluoromethyl)phenyl)propanoate (**6b**)

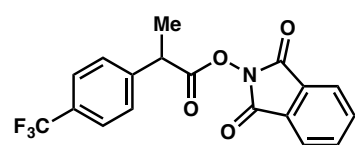

Prepared from 2-(4-(trifluoromethyl)phenyl)propanoic acid (200 mg, 0.92 mmol) according to General Procedure 1. The crude residue was purified by filtering through a plug of silica with 30%

EtOAc/hexane as the eluent to yield 290 mg (87% yield) of **6b** as a yellow solid.

$R_f$  = 0.28 (silica gel, 20% EtOAc/hexane, UV).

m.p. = 76–77 °C

$^1\text{H NMR}$  (400 MHz,  $\text{CDCl}_3$ ):  $\delta$  7.87 (dd,  $J$  = 5.6, 3.2 Hz, 2H), 7.78 (dd,  $J$  = 5.5, 3.1 Hz, 2H), 7.66 (d,  $J$  = 7.8 Hz, 2H), 7.54 (d,  $J$  = 8.1 Hz, 2H), 4.19 (q,  $J$  = 7.2 Hz, 1H), 1.69 (d,  $J$  = 7.2 Hz, 3H).

$^{13}\text{C NMR}$  (101 MHz,  $\text{CDCl}_3$ ):  $\delta$  170.3, 161.9, 142.4 (q,  $J_{\text{C-F}}$  = 1 Hz), 135.0, 130.2 (q,  $J_{\text{C-F}}$  = 33 Hz), 128.9, 128.2, 126.1 (q,  $J_{\text{C-F}}$  = 4 Hz), 124.14, 124.11 (q,  $J_{\text{C-F}}$  = 272 Hz), 43.0, 19.1.

$^{19}\text{F NMR}$  (282 MHz,  $\text{CDCl}_3$ ):  $\delta$  -65.8.

FTIR (NaCl, thin film,  $\text{cm}^{-1}$ ): 1813, 1788, 1746, 1620, 1468, 1421, 1359, 1326, 1186, 1168, 1125, 1079, 1067, 1048, 1017, 878, 842, 697.

HRMS (ESI-TOF,  $m/z$ ): calc'd for  $\text{C}_{18}\text{H}_{12}\text{F}_3\text{NO}_4$   $[\text{M}+\text{H}]^+$ : 364.0797; found: 364.0815.

### 1,3-dioxoisindolin-2-yl 2-(4-bromophenyl)propanoate (**6c**)

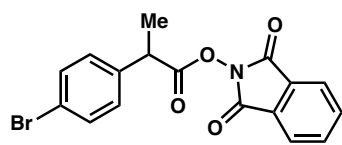

Prepared from 2-(4-bromophenyl)propanoic acid (1.0 g, 4.65 mmol) according to General Procedure 1. The crude residue was purified by filtering through a plug of silica with 20% EtOAc/hexane as the eluent to yield 511 mg (48% yield) of **6c** as a light yellow solid.

$R_f$  = 0.69 (silica gel, 20% EtOAc/hexane, UV).

m.p. = 77–78 °C

$^1\text{H NMR}$  (400 MHz,  $\text{CDCl}_3$ ):  $\delta$  7.86 (dd,  $J$  = 5.5, 3.0 Hz, 2H), 7.80 – 7.75 (m, 2H), 7.52 (d,  $J$  = 8.5 Hz, 2H), 7.29 (d,  $J$  = 8.4 Hz, 2H), 4.08 (q,  $J$  = 7.2 Hz, 1H), 1.65 (d,  $J$  = 7.2 Hz, 3H).

$^{13}\text{C NMR}$  (101 MHz,  $\text{CDCl}_3$ ):  $\delta$  170.5, 161.9, 137.4, 134.9, 132.2, 129.4, 129.0, 124.1, 122.0, 42.6, 19.0.

FTIR (NaCl, thin film,  $\text{cm}^{-1}$ ): 1811, 1786, 1742, 1489, 1467, 1369, 1186, 1133, 1078, 1046, 1010, 877, 696.

LRMS (API-ES,  $m/z$ ): calc'd for  $\text{C}_{17}\text{H}_{12}\text{BrNO}_4$   $[\text{M}+\text{H}_2\text{O}]^+$ : 391.0; found: 391.0.

### 1,3-dioxoisindolin-2-yl 2-(4-fluorophenyl)propanoate (**6d**)

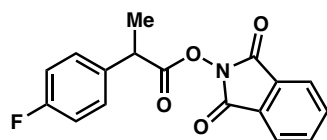

Prepared from 2-(4-fluorophenyl)propanoic acid (500 mg, 2.92 mmol) according to General Procedure 1. The crude residue was purified by filtering through a plug of silica with 20% EtOAc/hexane as the eluent to yield 590 mg (63% yield) of **6d** as a white solid.

$R_f$  = 0.35 (silica gel, 20% EtOAc/hexane, UV).

m.p. = 108–110 °C

$^1\text{H NMR}$  (400 MHz,  $\text{CDCl}_3$ ):  $\delta$  7.86 (dd,  $J$  = 5.6, 3.1 Hz, 2H), 7.77 (dd,  $J$  = 5.5, 3.1 Hz, 2H), 7.41 – 7.35 (m, 2H), 7.12 – 7.05 (m, 2H), 4.11 (q,  $J$  = 7.2 Hz, 1H), 1.66 (d,  $J$  = 7.2 Hz, 3H).

$^{13}\text{C NMR}$  (101 MHz,  $\text{CDCl}_3$ ):  $\delta$  170.78, 162.42 (d,  $J_{\text{C-F}}$  = 246.4 Hz), 161.9, 134.9, 134.2 (d,  $J_{\text{C-F}}$  = 3.3 Hz), 129.37 (d,  $J_{\text{C-F}}$  = 8.3 Hz), 129.9, 124.1, 115.95 (d,  $J_{\text{C-F}}$  = 21.5 Hz), 42.3, 19.2.

$^{19}\text{F NMR}$  (282 MHz,  $\text{CDCl}_3$ ):  $\delta$  -117.64 (tt,  $J_{\text{F-H}}$  = 8.4, 5.2 Hz).

FTIR (NaCl, thin film,  $\text{cm}^{-1}$ ): 1811, 1785, 1739, 1605, 1509, 1467, 1360, 1225, 1186, 1120, 1045, 1016, 959, 877, 837, 783, 696.

HRMS (FAB,  $m/z$ ): calc'd for  $\text{C}_{17}\text{H}_{12}\text{FNO}_4$   $[\text{M}+\text{H}]^+$ : 314.0823; found: 314.0859.

### 1,3-dioxoisindolin-2-yl 2-(4-(dimethylamino)phenyl)propanoate (**6e**)

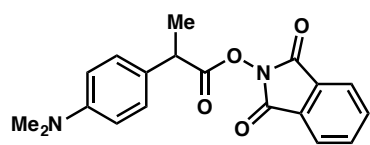

Prepared from 2-(4-(dimethylamino)phenyl)propanoic acid (392 mg, 2.02 mmol) according to General Procedure 1, with the exception of no DMAP. The crude residue was purified column chromatography (silica, 20 to 50% EtOAc/hexane) to yield 640 mg (94% yield) of **6e** as a yellow solid.

$R_f$  = 0.54 (silica gel, 50% EtOAc/hexane, UV).

m.p. = 106–108 °C

$^1\text{H NMR}$  (400 MHz,  $\text{CDCl}_3$ ):  $\delta$  7.85 (dd,  $J$  = 5.6, 3.1 Hz, 2H), 7.76 (dd,  $J$  = 5.5, 3.1 Hz, 2H), 7.27 (d,  $J$  = 8.8 Hz, 2H), 6.75 (d,  $J$  = 8.8 Hz, 2H), 4.04 (q,  $J$  = 7.2 Hz, 1H), 2.95 (s, 6H), 1.64 (d,  $J$  = 7.2 Hz, 3H).

$^{13}\text{C NMR}$  (101 MHz,  $\text{CDCl}_3$ ):  $\delta$  171.4, 162.1, 150.2, 134.8, 129.1, 128.3, 126.0, 124.0, 112.8, 42.1, 40.6, 19.2.

FTIR (NaCl, thin film,  $\text{cm}^{-1}$ ): 1809, 1784, 1743, 1615, 1523, 1467, 1356, 1186, 1134, 1081, 1044, 878, 819, 697.

HRMS (FAB,  $m/z$ ): calc'd for  $\text{C}_{19}\text{H}_{18}\text{N}_2\text{O}_4$  [ $\text{M}+\cdot$ ] $^+$ : 338.1267; found: 338.1272.

### 1,3-dioxoisindolin-2-yl 2-(3,4-dichlorophenyl)propanoate (**6f**)

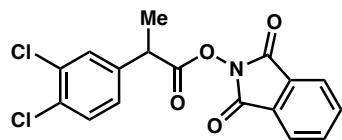

Prepared from 2-(3,4-dichlorophenyl)propanoic acid (231 mg, 1.05 mmol) according to General Procedure 1, with the exception of no DMAP. The crude residue was purified by column chromatography (silica, 0 to 15% EtOAc/hexane) to yield 241 mg (63% yield) of **6f** as a white solid.

$R_f$  = 0.35 (silica gel, 20% EtOAc/hexane, UV).

m.p. = 103–105 °C

$^1\text{H NMR}$  (400 MHz,  $\text{CDCl}_3$ ):  $\delta$  7.87 (dd,  $J$  = 5.5, 3.1 Hz, 2H), 7.79 (dd,  $J$  = 5.5, 3.1 Hz, 2H), 7.52 (d,  $J$  = 2.2 Hz, 1H), 7.47 (d,  $J$  = 8.3 Hz, 1H), 7.26 (dd,  $J$  = 8.3, 2.2 Hz, 1H), 4.08 (q,  $J$  = 7.2 Hz, 1H), 1.66 (d,  $J$  = 7.2 Hz, 3H).

$^{13}\text{C NMR}$  (101 MHz,  $\text{CDCl}_3$ ):  $\delta$  170.1, 161.9, 138.4, 135.0, 133.1, 132.2, 131.0, 129.9, 128.9, 127.1, 124.2, 42.3, 19.0.

FTIR (NaCl, thin film,  $\text{cm}^{-1}$ ): 2341, 2359, 1785, 1743, 1426, 1186, 1135, 1049, 962, 878, 696.

HRMS (FAB,  $m/z$ ): calc'd for  $\text{C}_{17}\text{H}_{11}\text{Cl}_2\text{NO}_4$  [ $\text{M}+\text{H}$ ] $^+$ : 364.0143; found: 364.0131.

### 1,3-dioxoisindolin-2-yl 2-phenylbutanoate (**6g**)

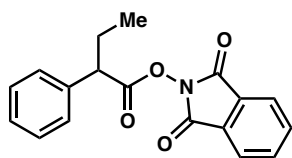

Prepared from 2-phenylbutanoic acid (5.0 g, 30.5 mmol) according to General Procedure 1. The crude residue was purified by column chromatography (silica, 20% EtOAc/hexane) to yield 8.1 g (86% yield) of **6g** as a white solid.

$R_f$  = 0.31 (silica gel, 20% EtOAc/hexane, UV).

m.p. = 61–64 °C

$^1\text{H NMR}$  (400 MHz,  $\text{CDCl}_3$ ):  $\delta$  7.85 (dd,  $J$  = 5.6, 3.1 Hz, 2H), 7.76 (dd,  $J$  = 5.5, 3.1 Hz, 2H), 7.42 – 7.29 (m, 5H), 3.86 (t,  $J$  = 7.6 Hz, 1H), 2.31 – 2.18 (m, 1H), 2.03 – 1.90 (m, 1H), 1.04 (t,  $J$  = 7.4 Hz, 3H).

$^{13}\text{C NMR}$  (101 MHz,  $\text{CDCl}_3$ ):  $\delta$  170.4, 162.0, 136.9, 134.8, 129.0, 128.9, 128.2, 128.0, 124.0, 50.5, 27.3, 12.0.

FTIR (NaCl, thin film,  $\text{cm}^{-1}$ ): 1811, 1786, 1744, 1467, 1455, 1360, 1186, 1128, 1080, 1058, 969, 877, 656.

HRMS (ESI-TOF,  $m/z$ ): calc'd for  $\text{C}_{18}\text{H}_{15}\text{NO}_4$   $[\text{M}+\text{H}]^+$ : 310.1079; found: 310.1061.

### 1,3-dioxoisindolin-2-yl 2,3-diphenylpropanoate (**6h**)

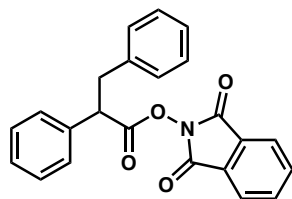

Prepared from 2,3-diphenylpropanoic acid (353 mg, 1.56 mmol) according to General Procedure 1. The crude residue was purified by column chromatography (silica, 20% EtOAc/hexane) to yield 542 mg (94% yield) of **6h** as a white solid.

$R_f$  = 0.28 (silica gel, 20% EtOAc/hexane, UV).

m.p. = 116–119 °C

$^1\text{H NMR}$  (400 MHz,  $\text{CDCl}_3$ ):  $\delta$  7.85 (dd,  $J$  = 5.5, 3.0 Hz, 2H), 7.76 (dd,  $J$  = 5.5, 3.1 Hz, 2H), 7.41 – 7.20 (m, 8H), 7.15 – 7.10 (m, 2H), 4.23 (t,  $J$  = 7.6 Hz, 1H), 3.56 (dd,  $J$  = 13.9, 7.5 Hz, 1H), 3.19 (dd,  $J$  = 13.9, 7.8 Hz, 1H).

$^{13}\text{C NMR}$  (101 MHz,  $\text{CDCl}_3$ ):  $\delta$  170.0, 161.8, 137.7, 136.4, 134.8, 129.2, 129.0, 128.9, 128.6, 128.3, 128.1, 126.9, 124.0, 50.9, 39.9.

FTIR (NaCl, thin film,  $\text{cm}^{-1}$ ): 3030, 1810, 1784, 1744, 1496, 1467, 1454, 1359, 1186, 1134, 1080, 1068, 972, 877, 736, 695.

HRMS (ESI-TOF,  $m/z$ ): calc'd for  $\text{C}_{23}\text{H}_{17}\text{NO}_4$   $[\text{M}+\text{H}]^+$ : 372.1236; found: 372.1236.

### 1,3-dioxoisindolin-2-yl 3-methyl-2-phenylbutanoate (**6i**)

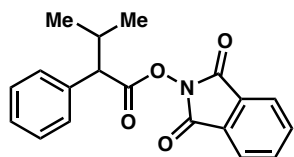

Prepared from 3-methyl-2-phenylbutanoic acid (300 mg, 1.68 mmol) according to General Procedure 1. The crude residue was purified by filtering through a plug of silica with 20% EtOAc/hexane as the eluent to yield 509 mg (93% yield) of **6i** as a white solid.

$R_f$  = 0.34 (silica gel, 20% EtOAc/hexane, UV).

m.p. = 77–81 °C

$^1\text{H NMR}$  (400 MHz,  $\text{CDCl}_3$ ):  $\delta$  7.84 (dd,  $J$  = 5.6, 3.1 Hz, 2H), 7.76 (dd,  $J$  = 5.5, 3.1 Hz, 2H), 7.42 – 7.29 (m, 5H), 3.58 (d,  $J$  = 10.0 Hz, 1H), 2.51 – 2.37 (m, 1H), 1.23 (d,  $J$  = 6.6 Hz, 3H), 0.84 (d,  $J$  = 6.7 Hz, 3H).

$^{13}\text{C NMR}$  (101 MHz,  $\text{CDCl}_3$ ):  $\delta$  170.2, 162.0, 136.1, 134.8, 129.0, 128.8, 128.7, 128.0, 124.0, 56.7, 32.6, 21.3, 20.3.

FTIR (NaCl, thin film,  $\text{cm}^{-1}$ ): 2966, 1811, 1786, 1745, 1468, 1455, 1375, 1311, 1186, 1132, 1080, 1060, 974, 889, 877, 786, 745, 696.

HRMS (ESI-TOF,  $m/z$ ): calc'd for  $\text{C}_{19}\text{H}_{17}\text{NO}_4$   $[\text{M}+\text{H}]^+$ : 324.1236; found: 324.1227.

### 1,3-dioxoisindolin-2-yl 3-((*tert*-butyldimethylsilyl)oxy)-2-phenylpropanoate (**6j**)

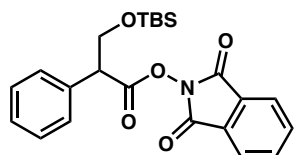

To a round bottom flask equipped with a stirring magnet was added tropic acid (830 mg, 5 mmol, 1 equiv), *tert*-butyldimethylsilyl chloride (1.1 g, 5.5 mmol, 1.1 equiv), dimethylaminopyridine (63 mg, 0.5 mmol, 0.1 equiv), and imidazole (682 mg, 10 mmol, 2 equiv). The reagents were dissolved in 15 mL of  $\text{CH}_2\text{Cl}_2$  and stirred overnight at room temperature. The reaction was quenched with aq.  $\text{NH}_4\text{Cl}$ , extracted with  $\text{Et}_2\text{O}$ , dried with  $\text{MgSO}_4$ , filtered, and concentrated under reduced pressure to afford crude 3-((*tert*-butyldimethylsilyl)oxy)-2-phenylpropanoic acid. This crude material was used in the esterification step without purification, which was performed according to General Procedure 1. The crude residue was purified by column chromatography and dried under high vacuum (silica, 0 to 20% EtOAc/hexane) to yield 664 mg (31% yield) of **6j** as a colorless oil.

$R_f$  = 0.38 (silica gel, 20% EtOAc/hexane, UV).

$^1\text{H NMR}$  (400 MHz,  $\text{CDCl}_3$ ):  $\delta$  7.86 (dd,  $J$  = 5.6, 3.1 Hz, 2H), 7.77 (dd,  $J$  = 5.5, 3.1 Hz, 2H), 7.43 – 7.31 (m, 5H), 4.28 – 4.18 (m, 2H), 3.93 (dd,  $J$  = 8.6, 4.4 Hz, 1H), 0.89 (s, 9H), 0.05 (s, 3H), 0.03 (s, 3H).

**<sup>13</sup>C NMR (101 MHz, CDCl<sub>3</sub>):** δ 169.0, 161.8, 134.8, 134.1, 129.1, 129.0, 128.5, 128.3, 124.0, 65.3, 52.2, 25.9, 18.4, -5.4, -5.6.

**FTIR (NaCl, thin film, cm<sup>-1</sup>):** 2953, 2929, 2856, 1814, 1788, 1747, 1468, 1361, 1256, 1186, 1113, 1049, 1023, 877, 836, 780, 696.

**HRMS (ESI-TOF, *m/z*):** calc'd for C<sub>23</sub>H<sub>27</sub>NO<sub>5</sub>Si [M+H]<sup>+</sup>: 426.1737; found: 426.1708.

### 1,3-dioxoisindolin-2-yl 2-phenylpent-4-enoate (**6k**)

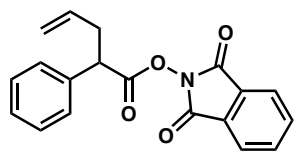

Prepared from 2-phenylpent-4-enoic acid (240 mg, 1.36 mmol) according to General Procedure 1. The crude residue was purified by column chromatography (silica, 0 to 20% EtOAc/hexane) to yield 295 mg (67% yield) of **6k** as a white solid.

**R<sub>f</sub>** = 0.31 (silica gel, 20% EtOAc/hexane, UV).

**m.p.** = 68–69 °C

**<sup>1</sup>H NMR (400 MHz, CDCl<sub>3</sub>):** δ 7.85 (dd, *J* = 5.6, 3.1 Hz, 2H), 7.76 (dd, *J* = 5.5, 3.1 Hz, 2H), 7.42 – 7.31 (m, 5H), 5.81 (ddt, *J* = 17.1, 10.2, 6.9 Hz, 1H), 5.16 (dq, *J* = 17.1, 1.5 Hz, 1H), 5.14 – 5.09 (m, 1H), 4.04 (dd, *J* = 8.0, 7.2 Hz, 1H), 3.00 – 2.90 (m, 1H), 2.68 (dtt, *J* = 14.3, 7.1, 1.3 Hz, 1H).

**<sup>13</sup>C NMR (101 MHz, CDCl<sub>3</sub>):** δ 169.9, 161.9, 136.4, 134.9, 134.0, 129.02, 128.99, 128.2, 128.1, 124.0, 118.3, 48.8, 37.9.

**FTIR (NaCl, thin film, cm<sup>-1</sup>):** 1811, 1785, 1743, 1467, 1359, 1186, 1133, 1080, 1068, 971, 877, 695.

**HRMS (ESI-TOF, *m/z*):** calc'd for C<sub>19</sub>H<sub>15</sub>NO<sub>4</sub> [M+H]<sup>+</sup>: 322.1079; found: 322.1063.

### 1,3-dioxoisindolin-2-yl 5-chloro-2-phenylpentanoate (**6l**)

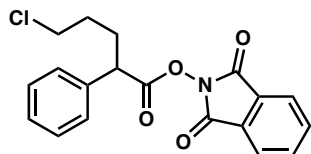

Prepared from 5-chloro-2-phenylpentanoic acid (1.01 g, 4.75 mmol) according to General Procedure 1. The crude residue was purified by filtering through a plug of silica with 20% EtOAc/hexane as the eluent to yield 977 mg (58% yield) of **6l** as a white solid.

**R<sub>f</sub>** = 0.25 (silica gel, 20% EtOAc/hexane, UV).

**m.p.** = 96–99 °C

**<sup>1</sup>H NMR (400 MHz, CDCl<sub>3</sub>):** δ 7.85 (dd, *J* = 5.6, 3.1 Hz, 2H), 7.77 (dd, *J* = 5.5, 3.1 Hz, 2H), 7.42 – 7.31 (m, 5H), 3.97 (t, *J* = 7.7 Hz, 1H), 3.64 – 3.52 (m, 2H), 2.34 (dddd, *J* = 13.2, 10.4, 8.0, 5.1 Hz, 1H), 2.13 (dddd, *J* = 13.5, 10.3, 7.4, 5.5 Hz, 1H), 2.01 – 1.78 (m, 2H).

**<sup>13</sup>C NMR (101 MHz, CDCl<sub>3</sub>):** δ 170.1, 161.9, 136.4, 134.9, 129.1, 129.0, 128.2, 128.1, 124.1, 48.2, 44.4, 31.2, 30.1.

**FTIR (NaCl, thin film, cm<sup>-1</sup>):** 2960, 1811, 1786, 1744, 1494, 1455, 1468, 1361, 1186, 1134, 1081, 1045, 965, 878, 697.

**HRMS (FAB, *m/z*):** calc'd for C<sub>19</sub>H<sub>16</sub>NO<sub>4</sub>Cl [M+H]<sup>+</sup>: 358.0846; found: 358.0872.

### 1,3-dioxoisindolin-2-yl 2-methoxy-2-phenylacetate (**8**)

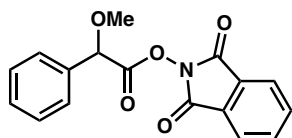

Prepared from 2-methoxy-2-phenylacetic acid (830 mg, 5.0 mmol) according to General Procedure 1. The crude residue was purified by column chromatography (silica, 10 to 30% EtOAc/hexane) to yield 1.16 g (74% yield) of **8** as a colorless oil. *Note: This compound will slowly decompose (solidifies/hydrolyzes) under ambient conditions over extended periods (~1 month).*

**R<sub>f</sub>** = 0.22 (silica gel, 20% EtOAc/hexane, UV).

**<sup>1</sup>H NMR (400 MHz, CDCl<sub>3</sub>):** δ 7.83 (dd, *J* = 5.5, 3.1 Hz, 2H), 7.75 (dd, *J* = 5.5, 3.1 Hz, 2H), 7.60 – 7.52 (m, 2H), 7.50 – 7.37 (m, 3H), 5.19 (s, 1H), 3.56 (s, 3H).

**<sup>13</sup>C NMR (101 MHz, CDCl<sub>3</sub>):** δ 167.4, 161.6, 134.9, 134.4, 129.6, 129.0, 128.8, 127.6, 124.1, 81.0, 58.0.

**FTIR (NaCl, thin film, cm<sup>-1</sup>):** 1818, 1789, 1745, 1468, 1359, 1186, 1079, 988, 969, 877, 696.

**HRMS (ESI-TOF, *m/z*):** calc'd for C<sub>17</sub>H<sub>13</sub>NO<sub>5</sub> [M+H]<sup>+</sup>: 312.0872; found: 312.0846.

### 1,3-dioxoisindolin-2-yl 2-cyclopropyl-2-phenylacetate (**10**)

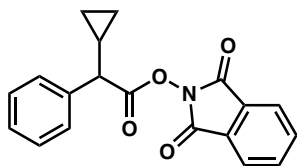

Prepared from 2-cyclopropyl-2-phenylacetic acid (50 mg, 0.28 mmol) according to General Procedure 1. The crude residue was purified by filtering through a plug of silica with 20% EtOAc/hexane as the eluent to yield 80 mg (89% yield) of **10** as a white solid.

**R<sub>f</sub>** = 0.39 (silica gel, 50% EtOAc/hexane, UV).

**m.p.** = 92–93 °C

**<sup>1</sup>H NMR (400 MHz, CDCl<sub>3</sub>):** δ 7.87 (dd, *J* = 5.5, 3.0 Hz, 2H), 7.81 – 7.75 (m, 2H), 7.50 – 7.45 (m, 2H), 7.44 – 7.38 (m, 2H), 7.37 – 7.31 (m, 1H), 3.29 (d, *J* = 9.7 Hz, 1H), 1.53 (dtt, *J* = 9.7, 8.0, 4.9 Hz, 1H), 0.82 (dddd, *J* = 9.0, 8.1, 4.6, 2.9 Hz, 1H), 0.69 (dddd, *J* = 8.9, 8.0, 5.8, 4.8 Hz, 1H), 0.63 – 0.55 (m, 1H), 0.42 – 0.34 (m, 1H).

**<sup>13</sup>C NMR (101 MHz, CDCl<sub>3</sub>):** δ 170.0, 162.0, 136.8, 134.9, 129.1, 128.9, 128.1, 128.0, 124.1, 53.4, 14.6, 4.91, 4.90.

**FTIR (NaCl, thin film, cm<sup>-1</sup>):** 1811, 1742, 1362, 1170, 1135, 1063, 974, 876.

**HRMS (FAB, *m/z*):** calc'd for C<sub>19</sub>H<sub>15</sub>NO<sub>4</sub> [M+H]<sup>+</sup>: 322.1079; found: 322.1065.



## b. Vinyl Bromide Synthesis

Vinyl bromides **1a**, **1b**, **1c**, **1j**, and **1m** were prepared according to procedures reported and referenced by Reisman and coworkers.<sup>13</sup>

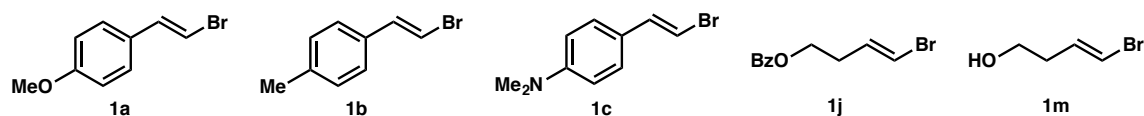

Vinyl bromides **1d**, **1e**, **1f**, **1g**, and **1i** were prepared according to General Procedure 2. Vinyl bromides **1d** and **1f** were subjected to NaOH-mediated isomerization to afford geometrically pure E-isomer. Vinyl bromides **1e**, **1g**, and **1i** were not subjected to NaOH-mediated isomerization; vinyl bromide **1e** decomposes under these conditions therefore the substrate used in the cross-coupling reaction was a 93:7 E:Z ratio. The NMR spectra of **1d**,<sup>13</sup> **1e**,<sup>15</sup> and **1f**<sup>16</sup> matched those reported in literature. The characterization data for **1g** and **1i** are reported below.

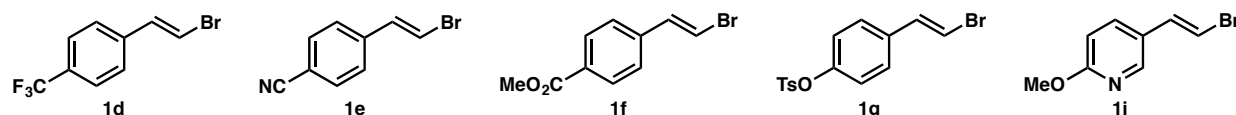

### General Procedure 2: Vinyl Bromides from Aldehydes

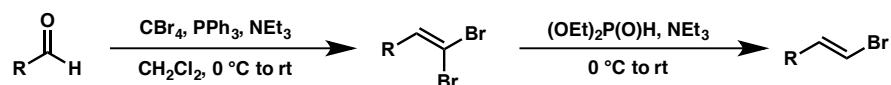

**General Procedure 2, Part A:** According to a procedure by Alexakis and coworkers,<sup>14</sup> a flame dried round bottom flask equipped with a magnetic stir bar was put under an inert atmosphere (N<sub>2</sub>) and charged with the tetrabromomethane (20 mmol, 2 equiv) and triphenylphosphine (40 mmol, 4 equiv). The flask was cooled to 0 °C and then CH<sub>2</sub>Cl<sub>2</sub> (30 mL) was added, followed by the triethylamine (10 mmol, 1 equiv). The aldehyde (10 mmol, 1 equiv) was dissolved in CH<sub>2</sub>Cl<sub>2</sub> (5 mL) and added dropwise to the reaction mixture. The reaction was allowed to warm to room temperature and continued to stir for 90 minutes. The reaction was removed from the stir plate and slowly added to a vigorously stirring solution of Et<sub>2</sub>O (150 mL) and hexane (150 mL), filtered through a plug of silica gel, and concentrated under reduced pressure to afford the desired dibromoalkene.

#### 4-(2,2-dibromovinyl)phenyl 4-methylbenzenesulfonate (S5)

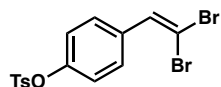

Prepared from 4-formylphenyl 4-methylbenzenesulfonate (5.14 g, 18.6 mmol) following General Procedure 2A. The crude residue was purified by filtering through a plug of silica to yield 6.2 g (77% yield) of **S5** as a white solid.

$R_f$  = 0.38 (silica gel, 10% EtOAc/hexane).

m.p. = 108–110 °C

$^1\text{H NMR}$  (400 MHz,  $\text{CDCl}_3$ ):  $\delta$  7.73 – 7.67 (m, 2H), 7.49 – 7.43 (m, 2H), 7.41 (s, 1H), 7.34 – 7.29 (m, 2H), 7.01 – 6.95 (m, 2H), 2.45 (s, 3H).

$^{13}\text{C NMR}$  (101 MHz,  $\text{CDCl}_3$ ):  $\delta$  149.3, 145.7, 135.6, 134.2, 132.3, 129.9, 129.8, 128.6, 122.5, 90.8, 21.9.

FTIR (NaCl, thin film,  $\text{cm}^{-1}$ ): 3081, 3065, 1929, 1910, 1596, 1500, 1495, 1406, 1379, 1360, 1271, 1178, 1160, 1094, 1018, 877, 832, 914, 781, 732, 706, 698, 658.

HRMS (FAB, m/z): calc'd for  $\text{C}_{15}\text{H}_{12}\text{Br}_2\text{O}_3\text{S}$   $[\text{M}+\text{H}]^+$ : 432.8932; found: 432.8915.

#### 5-(2,2-dibromovinyl)-2-methoxypyridine (S6)

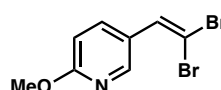

Prepared from 6-methoxynicotinaldehyde (1.36 g, 10 mmol) following General Procedure 2A. The crude residue was purified by column chromatography (silica, 1%  $\text{Et}_2\text{O}$ /hexane to 10%  $\text{Et}_2\text{O}$ /hexane) to yield 570 mg (20% yield) of **S6** as a yellow oil.

$R_f$  = 0.48 (silica gel, 10% EtOAc/hexane).

$^1\text{H NMR}$  (500 MHz,  $\text{CDCl}_3$ ):  $\delta$  8.25 (dt,  $J$  = 2.4, 0.6 Hz, 1H), 7.90 (ddd,  $J$  = 8.7, 2.5, 0.6 Hz, 1H), 7.37 (q,  $J$  = 0.6 Hz, 1H), 6.74 (dt,  $J$  = 8.7, 0.5 Hz, 2H), 3.94 (s, 3H).

$^{13}\text{C NMR}$  (126 MHz,  $\text{CDCl}_3$ ):  $\delta$  163.8, 147.6, 137.8, 133.5, 124.9, 110.7, 89.3, 53.8.

FTIR (NaCl, thin film,  $\text{cm}^{-1}$ ): 2982, 2946, 1603 1595, 1561, 1491, 1381, 1309, 1289, 1254, 1132, 1024, 1014, 867, 819, 751.

HRMS (ESI-TOF, m/z): calc'd for  $\text{C}_8\text{H}_7\text{NOBr}_2$   $[\text{M}+\text{H}]^+$ : 291.8973; found: 291.8967.

**General Procedure 2, Part B:** The dibromoalkene (1.7 mmol, 1 equiv) and diethyl phosphite (5.1 mmol, 3 equiv) were added to a vial with a magnetic stirring rod and put under an inert atmosphere ( $\text{N}_2$ ). The solution was cooled to 0 °C and the triethylamine (5.1 mmol, 3 equiv) was added dropwise. The reaction was warmed to room temperature and stirred overnight. The

reaction was quenched with water (5 mL) and extracted with CH<sub>2</sub>Cl<sub>2</sub> (20 mL). The organic layer was washed with brine (5 mL), dried with Na<sub>2</sub>SO<sub>4</sub>, filtered, and concentrated under reduced pressure. The crude residue was purified by column chromatography (silica, ether/hexanes) to afford the vinyl bromide.

**(E)-4-(2-bromovinyl)phenyl 4-methylbenzenesulfonate (1g)**

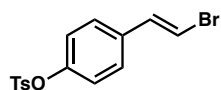

Prepared from **S5** (4.32 g, 10 mmol) following General Procedure 2B. The crude residue was purified by column chromatography (silica, 5% EtOAc/hexane to 20% EtOAc/hexane) to yield 2.75 g (78% yield, 90:10 E:Z) of **1g** as a white solid.

$R_f$  = 0.34 (silica gel, 10% EtOAc/hexane).

m.p. = 90–93 °C

<sup>1</sup>H NMR (400 MHz, CDCl<sub>3</sub>): δ 7.72 – 7.67 (m, 2H), 7.34 – 7.28 (m, 2H), 7.23 – 7.17 (m, 2H), 7.03 (d, *J* = 14.0 Hz, 1H), 6.96 – 6.90 (m, 2H), 6.73 (d, *J* = 14.0 Hz, 1H), 2.44 (s, 3H).

<sup>13</sup>C NMR (101 MHz, CDCl<sub>3</sub>): δ 149.3, 145.6, 135.9, 134.9, 132.3, 129.9, 128.6, 127.3, 122.9, 107.7, 21.9.

HRMS (FAB, *m/z*): calc'd for C<sub>15</sub>H<sub>13</sub>BrO<sub>3</sub>S [M+]<sup>+</sup>: 353.9748; found: 353.9733.

**(E)-5-(2-bromovinyl)-2-methoxypyridine (1i)**

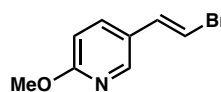

Prepared from **S6** (500 mg, 1.7 mmol) following General Procedure 2B. The crude residue was purified by column chromatography (silica, 2% Et<sub>2</sub>O/hexane to 5% Et<sub>2</sub>O/hexane) to yield 314 mg (86% yield, 96:4 E:Z) of **1i** as a white solid.

$R_f$  = 0.46 (silica gel, 10% EtOAc/hexane).

m.p. = 53–56 °C

<sup>1</sup>H NMR (500 MHz, CDCl<sub>3</sub>): δ 8.05 (d, *J* = 2.5 Hz, 1H), 7.54 (ddd, *J* = 8.7, 2.5, 0.4 Hz, 1H), 7.02 (dq, *J* = 14.0, 0.5 Hz, 1H), 6.70 (dt, *J* = 8.7, 0.6 Hz, 1H), 6.65 (d, *J* = 14.0 Hz, 1H), 3.93 (s, 3H).

<sup>13</sup>C NMR (126 MHz, CDCl<sub>3</sub>): δ 164.0, 145.3, 135.3, 133.5, 125.5, 111.4, 105.5, 53.7.

FTIR (NaCl, thin film, cm<sup>-1</sup>): 3061, 2943, 1613, 1598, 1562, 1490, 1385, 1303, 1285, 1258, 1238, 1026, 1015, 947, 837, 790.

HRMS (ESI-TOF, *m/z*): calc'd for C<sub>8</sub>H<sub>8</sub>NOBr [M+H]<sup>+</sup>: 213.9868; found: 213.9858.

Vinyl bromide **1h** was prepared by a NaOH-mediated isomerization of commercially available  $\beta$ -bromostyrene as reported by Alexakis and coworkers.<sup>14</sup>

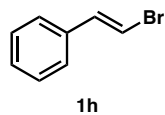

Vinyl bromide **1k** was prepared via a hydrozirconation/bromination sequence similar to a procedure reported by Zhou, Lin, and coworkers.<sup>17</sup> The NMR spectra matched those reported in literature.<sup>18</sup>

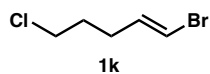

Vinyl bromide **1l** was prepared according to a procedure reported by Wolfe and coworkers.<sup>19</sup>

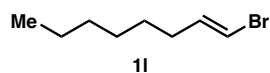

Vinyl bromides **1n** and **1o** were purchased from a commercial source (Sigma Aldrich).

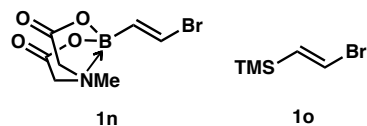

## 6. Vinyl Bromide-NHP Ester Cross-Coupling

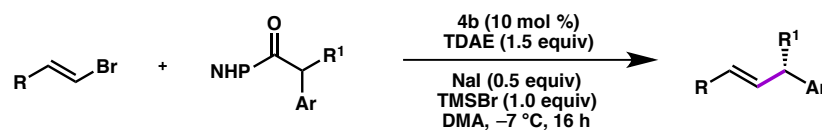

### a. General Procedure 3: Reaction on 0.2 mmol scale:

On a bench-top, a 1 dram vial equipped with a stir bar was charged with the vinyl bromide (if air stable, 0.2 mmol, 1 equiv), NHP ester (0.2 mmol, 1 equiv), **4b** (11.5 mg, 0.02 mmol, 0.10 equiv), and sodium iodide (15.0 mg, 0.1 mmol, 0.5 equiv). The vial was then brought into the glovebox and charged with the vinyl bromide (if air sensitive, 0.2 mmol, 1 equiv) and DMA (0.2 mL, 1.0 M). The vial was then cooled to  $-7\text{ }^{\circ}\text{C}$  and the reagents were stirred at 250 rpm until dissolved. *Note: The recirculating Julabo LH45 chiller was set to  $-10\text{ }^{\circ}\text{C}$  however an external thermometer in the glovebox read the temperature as  $-7\text{ }^{\circ}\text{C}$ .* The tetrakis(dimethylamino)ethylene (TDAE, 0.3 mmol, 70  $\mu\text{L}$ , 1.5 equiv) was added and stirred for 10 minutes before the trimethylsilyl bromide (TMSBr, 0.2 mmol, 26  $\mu\text{L}$ , 1 equiv) was added. The vial was sealed with a screw cap and stirred under nitrogen at  $-7\text{ }^{\circ}\text{C}$  for 16 hours (overnight) in temperature controlled well plates in the glovebox. *Note: Monitoring the reaction kinetics for product **3a** revealed that the reaction went to  $>90\%$  conversion after 1 hour, however we choose to run these reactions overnight to ensure full conversion.* As the reaction proceeds, the TDAE salts begin to precipitate, forming an orange slurry. The crude reaction was quenched with 0.5 mL of 1 M HCl, diluted with water (5 mL), and extracted with diethyl ether (3 x 10 mL). *Note: In order to efficiently remove all of the viscous reaction contents from the vial, we found it useful to fill the vial  $\frac{3}{4}$  full with an extraction solvent (2.5 mL each time: first HCl/water, then Et<sub>2</sub>O, water, Et<sub>2</sub>O 3x), screw on a Teflon cap, and shake the vial vigorously with the stir bar still inside. The contents could then be easily poured into a separatory funnel.* The combined organic layers were washed with brine (5 mL), dried with MgSO<sub>4</sub>, filtered, and concentrated under reduced pressure. The crude residue was purified by column chromatography.

## b. Assignment of Absolute Stereochemistry

The absolute stereochemistry of **3a**, **3b**, and **3h** were assigned by comparing the optical rotation of the purified products to literature values. The optical rotation of products **3a–d**, **3j**, **7a**, **7c**, **7d**, **7g**, and **7h** correspond with those in reported in literature synthesized using the same chiral ligand (*R,R,S,S*)-**L**.<sup>13</sup> Chiral products **3e–g**, **3i**, **3k–o**, **7b**, **7e**, **7f**, **7i–l**, and **9** were assigned by analogy.

## c. Images of Reaction Setup

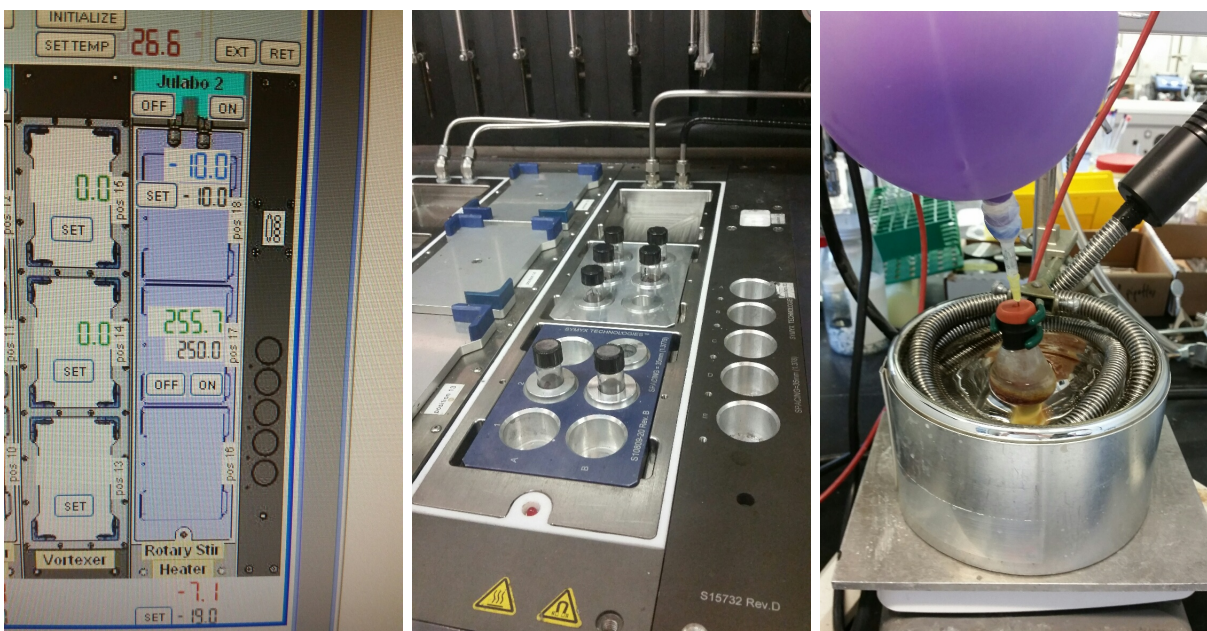

**(Left)** The computer console sets the chiller to  $-10.0\text{ }^{\circ}\text{C}$ , while actual temperature reading is  $-7.1\text{ }^{\circ}\text{C}$ ; stir plate set at 250 rpm and reads 255.7 rpm. **(Center)** Reactions conducted on 0.2 mmol scale and stirred in the temperature controlled glovebox stir plates. **(Right)** Conducting the reaction on the benchtop on a 5 mmol scale under a balloon of nitrogen; a cryocooler is used to cool the reaction to  $-5\text{ }^{\circ}\text{C}$ .

#### d. Characterization of Reaction Products

##### (*S,E*)-1-methoxy-4-(3-phenylbut-1-en-1-yl)benzene (**3a**)

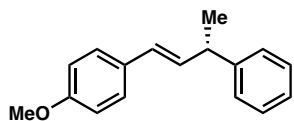

Prepared from (*E*)-1-(2-bromovinyl)-4-methoxybenzene (**1a**, 43 mg, 0.2 mmol) and 1,3-dioxoisindolin-2-yl 2-phenylpropanoate (**2**, 59 mg, 0.2 mmol) according to General Procedure 3. The crude residue was purified by column chromatography (silica gel, 10 to 20% toluene/hexane) to yield **3a** (39 mg, 80% yield) in 96% ee as a colorless oil. Spectral data matched those reported in literature.<sup>13</sup>

##### Preparative Scale: Reaction on 5.0 mmol scale:

On a bench-top to a 25 mL round bottom flask equipped with a stir bar was added vinyl bromide **1a** (1.065 g, 5 mmol, 1 equiv), NHP ester **2** (1.476 g, 5 mmol, 1 equiv), **4b** (0.29 g, 0.5 mmol, 0.10 equiv), and sodium iodide (0.37 g, 2.5 mmol, 0.5 equiv). The flask was sealed with a rubber septum, purged with nitrogen, and the reagents were dissolved in DMA (5.0 mL, 1.0 M). The flask was cooled to  $-5\text{ }^{\circ}\text{C}$  by submerging it in an isopropanol bath cooled with a Thermo Scientific EK90 Immersion Cooler. *Note: We found that TDAE will begin to freeze at temperatures lower than  $-8\text{ }^{\circ}\text{C}$  with this setup.* The tetrakis(dimethylamino)ethylene (TDAE, 1.74 mL, 7.5 mmol, 1.5 equiv) was added and stirred for 10 minutes before the trimethylsilyl bromide (TMSBr, 0.66 mL, 5.0 mmol, 1 equiv) was added. The flask was stirred under a balloon of nitrogen at  $-5\text{ }^{\circ}\text{C}$  for 16 hours. As the reaction proceeds, the TDAE salts begin to precipitate, forming an orange slurry. The crude reaction was quenched with 1 M HCl (30 mL), and extracted with diethyl ether (3 x 20 mL). The combined organic layers were washed with water (2 x 20 mL) and brine (20 mL), dried with  $\text{MgSO}_4$ , filtered, and concentrated under reduced pressure. The crude residue was purified by column chromatography (silica gel, 10 to 20% toluene/hexane) to yield **3a** (918 mg, 77% yield) in 91% ee as a colorless oil.

$R_f = 0.59$  (silica gel, 10% EtOAc/hexane, UV).

**Chiral SFC:** (OB-H, 2.5 mL/min, 20% IPA in  $\text{CO}_2$ ,  $\lambda = 254\text{ nm}$ ):  $t_R$  (major) = 7.1 min,  $t_R$  (minor) = 8.4 min.

$[\alpha]_D^{25} = -34^{\circ}$  ( $c = 1.0$ ,  $\text{CHCl}_3$ ).

**<sup>1</sup>H NMR (400 MHz, CDCl<sub>3</sub>):** δ 7.37 – 7.27 (m, 6H), 7.25 – 7.20 (m, 1H), 6.85 (d, *J* = 8.8 Hz, 2H), 6.38 (d, *J* = 16.2 Hz, 1H), 6.27 (dd, *J* = 15.9, 6.7 Hz, 1H), 3.81 (s, 3H), 3.70 – 3.58 (m, 1H), 1.48 (d, *J* = 7.0 Hz, 3H).

**<sup>13</sup>C NMR (101 MHz, CDCl<sub>3</sub>):** δ 158.9, 146.0, 133.3, 130.5, 128.6, 128.0, 127.42, 127.36, 126.3, 114.0, 55.4, 42.7, 21.5.

The optical rotation of **3a** generated in the presence of (*R,R,S,S*)-**4b** was measured as  $[\alpha]_D^{25} = -34^\circ$  (*c* = 1.0, CHCl<sub>3</sub>). Lit:  $[\alpha]_D^{25} = -16^\circ$  (*c* = 1.28, CHCl<sub>3</sub>, *S* enantiomer, 94% ee).<sup>21</sup> Based on the literature precedent, we assign our product as the *S* enantiomer.



**(*S,E*)-1-methyl-4-(3-phenylbut-1-en-1-yl)benzene (3b)**

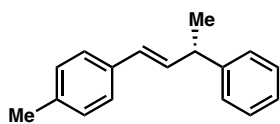

Prepared from (*E*)-1-(2-bromovinyl)-4-methylbenzene (**1b**, 39 mg, 0.2 mmol) and 1,3-dioxoisindolin-2-yl 2-phenylpropanoate (**2**, 59 mg, 0.2 mmol) according to General Procedure 3. The crude residue was purified by column chromatography (10% AgNO<sub>3</sub> silica gel, 0 to 2% Et<sub>2</sub>O/hexane) to yield **3b** (39 mg, 88% yield) in 95% ee as a colorless oil. Spectral data matched those reported in literature.<sup>13</sup>

$R_f = 0.26$  (silica gel, hexane, UV).

**Chiral SFC:** (OJ-H, 2.5 mL/min, 7% IPA in CO<sub>2</sub>,  $\lambda = 254$  nm):  $t_R$  (minor) = 8.0 min,  $t_R$  (major) = 10.0 min.

$[\alpha]_D^{25} = -41^\circ$  ( $c = 1.0$ , CHCl<sub>3</sub>).

**<sup>1</sup>H NMR (400 MHz, CDCl<sub>3</sub>):**  $\delta$  7.41 – 7.30 (m, 6H), 7.30 – 7.24 (m, 1H), 7.16 (d,  $J = 8.0$  Hz, 2H), 6.52 – 6.34 (m, 2H), 3.74 – 3.64 (m, 1H), 2.38 (s, 3H), 1.53 (d,  $J = 7.0$  Hz, 3H).

**<sup>13</sup>C NMR (101 MHz, CDCl<sub>3</sub>):**  $\delta$  145.9, 136.9, 134.9, 134.3, 129.3, 128.6, 128.5, 127.5, 126.3, 126.2, 42.7, 21.5, 21.3.

The optical rotation of **3b** generated in the presence of (*R,R,S,S*)-**4b** was measured as  $[\alpha]_D^{25} = -41^\circ$  ( $c = 1.0$ , CHCl<sub>3</sub>). Lit:  $[\alpha]_D^{25} = +38.4^\circ$  ( $c = 0.98$ , CHCl<sub>3</sub>, *R* enantiomer, 91% ee).<sup>22</sup> Based on the literature precedent, we assign our product as the *S* enantiomer.

**(*S,E*)-*N,N*-dimethyl-4-(3-phenylbut-1-en-1-yl)aniline (3c)**

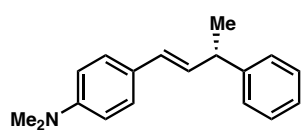

Prepared from (*E*)-4-(2-bromovinyl)-*N,N*-dimethylaniline (**1c**, 45 mg, 0.2 mmol) and 1,3-dioxoisindolin-2-yl 2-phenylpropanoate (**2**, 59 mg, 0.2 mmol) according to General Procedure 3. The crude residue was purified by column chromatography (silica gel, 5% Et<sub>2</sub>O/hexane) to yield **3c** (38 mg, 76% yield) in 97% ee as a white solid. Spectral data matched those reported in literature.<sup>13</sup>

$R_f$  = 0.21 (silica gel, 5% Et<sub>2</sub>O/hexane, UV).

m.p. = 65–67 °C

**Chiral SFC:** (OB-H, 2.5 mL/min, 35% IPA in CO<sub>2</sub>,  $\lambda$  = 254 nm):  $t_R$  (major) = 6.0 min,  $t_R$  (minor) = 9.0 min.

$[\alpha]_D^{25} = -56^\circ$  (c = 1.0, CHCl<sub>3</sub>).

**<sup>1</sup>H NMR (400 MHz, CDCl<sub>3</sub>):**  $\delta$  7.40 – 7.29 (m, 6H), 7.29 – 7.23 (m, 1H), 6.73 (d,  $J$  = 8.8 Hz, 2H), 6.40 (d,  $J$  = 15.9 Hz, 1H), 6.24 (dd,  $J$  = 15.8, 6.8 Hz, 1H), 3.72 – 3.62 (m, 1H), 3.00 (s, 6H), 1.51 (d,  $J$  = 7.0 Hz, 3H).

**<sup>13</sup>C NMR (101 MHz, CDCl<sub>3</sub>):**  $\delta$  149.9, 146.4, 131.2, 128.5, 128.4, 127.5, 127.1, 126.4, 126.1, 112.7, 42.7, 40.8, 21.6.

**(*S,E*)-1-(3-phenylbut-1-en-1-yl)-4-(trifluoromethyl)benzene (3d)**

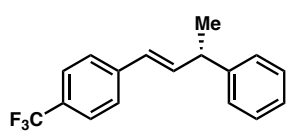

Prepared from (*E*)-1-(2-bromovinyl)-4-(trifluoromethyl)benzene (**1d**, 50 mg, 0.2 mmol) and 1,3-dioxoisindolin-2-yl 2-phenylpropanoate (**2**, 59 mg, 0.2 mmol) according to General Procedure 3. The crude residue was purified by column chromatography (silica gel, hexane) to yield **3d** (48 mg, 87% yield) in 93% ee as a colorless oil. Spectral data matched those reported in literature.<sup>13</sup>

$R_f = 0.32$  (silica gel, hexane, UV).

**Chiral SFC:** (OJ-H, 2.5 mL/min, 3% IPA in CO<sub>2</sub>,  $\lambda = 254$  nm):  $t_R$  (minor) = 6.3 min,  $t_R$  (major) = 7.3 min.

$[\alpha]_D^{25} = -27^\circ$  ( $c = 1.0$ , CHCl<sub>3</sub>).

**<sup>1</sup>H NMR (400 MHz, CDCl<sub>3</sub>):**  $\delta$  7.56 (d,  $J = 8.6$  Hz, 2H), 7.46 (d,  $J = 8.2$  Hz, 2H), 7.40 – 7.33 (m, 2H), 7.33 – 7.23 (m, 3H), 6.52 (dd,  $J = 15.9, 6.2$  Hz, 1H), 6.45 (d,  $J = 16.0$  Hz, 1H), 3.74 – 3.64 (m, 1H), 1.51 (d,  $J = 7.0$  Hz, 3H).

**<sup>13</sup>C NMR (101 MHz, CDCl<sub>3</sub>):**  $\delta$  145.2, 141.2 (q,  $J_{C-F} = 1$  Hz), 138.1, 129.0 (q,  $J_{C-F} = 32$  Hz), 128.7, 127.5, 127.4, 126.6, 126.4, 125.6 (q,  $J_{C-F} = 4$  Hz), 124.4 (q,  $J_{C-F} = 272$  Hz), 42.8, 21.2.

**<sup>19</sup>F NMR (282 MHz, CDCl<sub>3</sub>):**  $\delta$  -65.6.

**(*S,E*)-4-(3-phenylbut-1-en-1-yl)benzotrile (3e)**

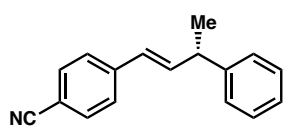

Prepared from methyl (*E*)-4-(2-bromovinyl)benzotrile (**1e**, 42 mg, 0.2 mmol) and 1,3-dioxisoindolin-2-yl 2-phenylpropanoate (**2**, 59 mg, 0.2 mmol) according to General Procedure 3. The crude residue was purified by column chromatography (silica gel, 0 to 3% Et<sub>2</sub>O/hexane) to yield **3e** (42 mg, 91% yield) in 94% ee as a colorless oil.

$R_f = 0.42$  (silica gel, 10% EtOAc/hexane, UV).

**Chiral SFC:** (OB-H, 2.5 mL/min, 10% IPA in CO<sub>2</sub>,  $\lambda = 254$  nm):  $t_R$  (minor) = 9.5 min,  $t_R$  (major) = 10.1 min.

$[\alpha]_D^{25} = -51^\circ$  ( $c = 1.0$ , CHCl<sub>3</sub>).

**<sup>1</sup>H NMR (400 MHz, CDCl<sub>3</sub>):**  $\delta$  7.54 (d,  $J = 8.5$  Hz, 2H), 7.40 (d,  $J = 8.3$  Hz, 2H), 7.36 – 7.30 (m, 2H), 7.28 – 7.19 (m, 3H), 6.52 (dd,  $J = 15.9, 6.7$  Hz, 1H), 6.40 (d,  $J = 16.0$  Hz, 1H), 3.72 – 3.61 (m, 1H), 1.48 (d,  $J = 7.0$  Hz, 3H).

**<sup>13</sup>C NMR (101 MHz, CDCl<sub>3</sub>):**  $\delta$  144.7, 142.1, 139.5, 132.4, 128.7, 127.3, 127.2, 126.7, 126.6, 119.2, 110.2, 42.8, 21.0.

**FTIR (NaCl, thin film, cm<sup>-1</sup>):** 3027, 2967, 2872, 2225, 1646, 1604, 1504, 1493, 1452, 1412, 1176, 1013, 970, 866, 819, 763, 701.

**HRMS (FAB,  $m/z$ ):** calc'd for C<sub>17</sub>H<sub>15</sub>N [M+H]<sup>+</sup>: 234.1283; found: 234.1265.

### Methyl (*S,E*)-4-(3-phenylbut-1-en-1-yl)benzoate (**3f**)

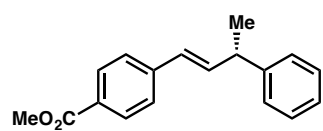

Prepared from methyl (*E*)-4-(2-bromovinyl)benzoate (**1f**, 48 mg, 0.2 mmol) and 1,3-dioxoisindolin-2-yl 2-phenylpropanoate (**2**, 59 mg, 0.2 mmol) according to General Procedure 3. The crude residue was purified by column chromatography (silica gel, 5% Et<sub>2</sub>O/hexane) to yield **3f** (46 mg, 87% yield) in 95% ee as a colorless oil.

$R_f = 0.19$  (silica gel, 5% Et<sub>2</sub>O/hexane, UV).

**Chiral SFC:** (OB-H, 2.5 mL/min, 20% IPA in CO<sub>2</sub>,  $\lambda = 254$  nm):  $t_R$  (minor) = 8.2 min,  $t_R$  (major) = 11.6 min.

$[\alpha]_D^{25} = -44^\circ$  ( $c = 1.0$ , CHCl<sub>3</sub>).

**<sup>1</sup>H NMR (400 MHz, CDCl<sub>3</sub>):**  $\delta$  7.96 (d,  $J = 8.4$  Hz, 2H), 7.41 (d,  $J = 8.3$  Hz, 2H), 7.37 – 7.30 (m, 2H), 7.30 – 7.20 (m, 3H), 6.53 (dd,  $J = 15.9, 6.5$  Hz, 1H), 6.44 (d,  $J = 16.1$  Hz, 1H), 3.91 (s, 3H), 3.72 – 3.62 (m, 1H), 1.49 (d,  $J = 7.0$  Hz, 3H).

**<sup>13</sup>C NMR (101 MHz, CDCl<sub>3</sub>):**  $\delta$  167.1, 145.2, 142.2, 138.2, 130.0, 128.7, 128.6, 127.9, 127.4, 126.5, 126.1, 52.2, 42.8, 21.2.

**FTIR (NaCl, thin film, cm<sup>-1</sup>):** 3025, 2963, 1718, 1605, 1492, 1433, 1411, 1276, 1177, 1108, 1015, 968, 759, 698.

**LRMS (GC-MS,  $m/z$ ):** calc'd for C<sub>18</sub>H<sub>18</sub>O<sub>2</sub> [M]<sup>+</sup>: 266.1; found: 266.1.

**(*S,E*)-4-(3-phenylbut-1-en-1-yl)phenyl 4-methylbenzenesulfonate (3g)**

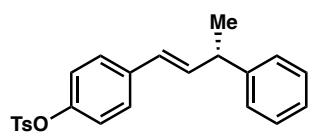

Prepared from (*E*)-4-(2-bromovinyl)phenyl 4-methylbenzenesulfonate (**1g**, 71 mg, 0.2 mmol) and 1,3-dioxoisindolin-2-yl 2-phenylpropanoate (**2**, 89 mg, 0.3 mmol) according to General Procedure 3 with the exception that 1.5 equiv NHP ester was used instead of 1.0 equiv. *Note: The addition of excess NHP ester ensured full consumption of the vinyl bromide, which we found to be inseparable from the product when it remained in the crude reaction.* The crude residue was purified by column chromatography (silica gel, hexane to 5% Et<sub>2</sub>O/hexane) to yield **3g** (61 mg, 80% yield) in 94% ee as a colorless oil.

$R_f = 0.39$  (silica gel, 10% EtOAc/hexane, UV).

**Chiral SFC:** (OJ-H, 2.5 mL/min, 15% IPA in CO<sub>2</sub>,  $\lambda = 254$  nm):  $t_R$  (minor) = 12.2 min,  $t_R$  (major) = 13.7 min.

$[\alpha]_D^{25} = -24^\circ$  ( $c = 1.0$ , CHCl<sub>3</sub>).

**<sup>1</sup>H NMR (400 MHz, CDCl<sub>3</sub>):**  $\delta$  7.70 (d,  $J = 8.4$  Hz, 2H), 7.36 – 7.28 (m, 4H), 7.28 – 7.20 (m, 5H), 6.90 (d,  $J = 8.7$  Hz, 2H), 6.39 – 6.30 (m, 2H), 3.69 – 3.58 (m, 1H), 2.45 (s, 3H), 1.46 (d,  $J = 7.0$  Hz, 3H).

**<sup>13</sup>C NMR (101 MHz, CDCl<sub>3</sub>):**  $\delta$  148.5, 145.4, 145.3, 136.7, 136.5, 132.4, 129.8, 128.6, 127.3, 127.2, 126.4, 122.5, 42.7, 21.8, 21.2.

**FTIR (NaCl, thin film, cm<sup>-1</sup>):** 3061, 3028, 2966, 2928, 2872, 1647, 1599, 1504, 1453, 1372, 1307, 1296, 1198, 1176, 1152, 1093, 1016, 969, 867, 841, 815, 763, 735, 700, 661.

**HRMS (FAB,  $m/z$ ):** calc'd for C<sub>23</sub>H<sub>22</sub>O<sub>3</sub>S [M+]<sup>+</sup>: 378.1290; found: 378.1283.

**(*S,E*)-but-1-ene-1,3-diyl dibenzene (3h)**

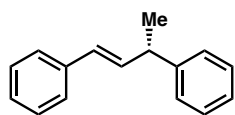

Prepared from (*E*)-(2-bromovinyl)benzene (**1h**, 37 mg, 0.2 mmol) and 1,3-dioxisoindolin-2-yl 2-phenylpropanoate (**2**, 59 mg, 0.2 mmol) according to General Procedure 3. The crude residue was purified by column chromatography (silica gel, hexane) to yield **3h** (37 mg, 88% yield) in 96% ee as a colorless oil.

$R_f = 0.48$  (silica gel, hexane, UV).

**Chiral SFC:** (OJ-H, 2.5 mL/min, 5% IPA in CO<sub>2</sub>,  $\lambda = 254$  nm):  $t_R$  (minor) = 9.8 min,  $t_R$  (major) = 10.9 min.

$[\alpha]_D^{25} = -35^\circ$  ( $c = 1.0$ , CHCl<sub>3</sub>).

**<sup>1</sup>H NMR (400 MHz, CDCl<sub>3</sub>):**  $\delta$  7.43 – 7.29 (m, 8H), 7.29 – 7.21 (m, 2H), 6.51 – 6.38 (m, 2H), 3.73 – 3.65 (m, 1H), 1.52 (d,  $J = 7.0$  Hz, 3H).

**<sup>13</sup>C NMR (101 MHz, CDCl<sub>3</sub>):**  $\delta$  145.7, 137.7, 135.3, 128.6 (3C), 127.4, 127.2, 126.35, 126.27, 42.7, 21.4.

**FTIR (NaCl, thin film, cm<sup>-1</sup>):** 3080, 3058, 3024, 2964, 2928, 2871, 1599, 1492, 1448, 1371, 1010, 964, 742, 692.

**HRMS (ESI-TOF,  $m/z$ ):** calc'd for C<sub>16</sub>H<sub>16</sub> [M-H<sub>2</sub>+H]<sup>+</sup>: 207.1174; found: 207.1155.

The optical rotation of **3h** generated in the presence of (*R,R,S,S*)-**4b** was measured as  $[\alpha]_D^{25} = -35^\circ$  ( $c = 1.0$ , CHCl<sub>3</sub>). Lit:  $[\alpha]_D^{25} = -21.1^\circ$  ( $c = 1.42$ , CHCl<sub>3</sub>, *S* enantiomer, 95% ee).<sup>23</sup> Based on the literature precedent, we assign our product as the *S* enantiomer.

**(*S,E*)-2-methoxy-5-(3-phenylbut-1-en-1-yl)pyridine (**3i**)**

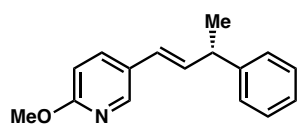

Prepared from (*E*)-5-(2-bromovinyl)-2-methoxypyridine (**1i**, 43 mg, 0.2 mmol) and 1,3-dioxoisindolin-2-yl 2-phenylpropanoate (**2**, 59 mg, 0.2 mmol) according to General Procedure 3. The crude residue was purified by column chromatography (silica gel, 5% Et<sub>2</sub>O/hexane) to yield **3i** (32 mg, 67% yield) in 95% ee as a colorless oil.

$R_f = 0.53$  (silica gel, 10% EtOAc/hexane, UV).

**Chiral SFC:** (OB-H, 2.5 mL/min, 15% IPA in CO<sub>2</sub>,  $\lambda = 280$  nm):  $t_R$  (major) = 5.0 min,  $t_R$  (minor) = 6.9 min.

$[\alpha]_D^{25} = -33^\circ$  ( $c = 1.0$ , CHCl<sub>3</sub>).

**<sup>1</sup>H NMR (400 MHz, CDCl<sub>3</sub>):**  $\delta$  8.06 (d,  $J = 2.4$  Hz, 1H), 7.62 (dd,  $J = 8.7, 2.5$  Hz, 1H), 7.35 – 7.28 (m, 2H), 7.28 – 7.18 (m, 3H), 6.67 (d,  $J = 8.6$  Hz, 1H), 6.33 (d,  $J = 16.1$  Hz, 1H), 6.26 (dd,  $J = 15.9, 6.3$  Hz, 1H), 3.91 (s, 3H), 3.66 – 3.57 (m, 1H), 1.45 (d,  $J = 7.0$  Hz, 3H).

**<sup>13</sup>C NMR (101 MHz, CDCl<sub>3</sub>):**  $\delta$  163.4, 145.6, 145.3, 135.5, 134.7, 128.7, 127.4, 126.8, 126.4, 124.7, 110.9, 53.6, 42.8, 21.3.

**FTIR (NaCl, thin film, cm<sup>-1</sup>):** 2965, 1601, 1493, 1384, 1286, 1026, 962, 822, 762, 699.

**HRMS (FAB,  $m/z$ ):** calc'd for C<sub>16</sub>H<sub>17</sub>NO [M+H]<sup>+</sup>: 240.1388; found: 240.1398.



**(*S,E*)-5-phenylhex-3-en-1-yl benzoate (**3j**)**

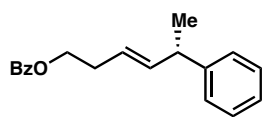

Prepared from (*E*)-4-bromobut-3-en-1-yl benzoate (**1j**, 51 mg, 0.2 mmol) and 1,3-dioxoisindolin-2-yl 2-phenylpropanoate (**2**, 59 mg, 0.2 mmol) according to General Procedure 3. The crude residue was purified by column chromatography (silica gel, 5% Et<sub>2</sub>O/hexane) to yield **3j** (49 mg, 88% yield) in 97% ee as a colorless oil. Spectral data matched those reported in literature.<sup>13</sup>

$R_f = 0.24$  (silica gel, 5% Et<sub>2</sub>O/hexane, UV).

**Chiral SFC:** (OJ-H, 2.5 mL/min, 10% IPA in CO<sub>2</sub>,  $\lambda = 254$  nm):  $t_R$  (major) = 5.2 min,  $t_R$  (minor) = 6.1 min.

$[\alpha]_D^{25} = +5^\circ$  (c = 1.0, CHCl<sub>3</sub>).

**<sup>1</sup>H NMR (400 MHz, CDCl<sub>3</sub>):**  $\delta$  8.04 – 8.00 (m, 2H), 7.59 – 7.53 (m, 1H), 7.46 – 7.40 (m, 2H), 7.29 – 7.23 (m, 2H), 7.22 – 7.15 (m, 3H), 5.77 (ddt,  $J = 15.4, 6.8, 1.3$  Hz, 1H), 5.52 (dtd,  $J = 15.2, 6.8, 1.3$  Hz, 1H), 4.36 (td,  $J = 6.7, 1.4$  Hz, 2H), 3.50 – 3.42 (m, 1H), 2.54 – 2.46 (m, 2H), 1.35 (d,  $J = 7.0$  Hz, 3H).

**<sup>13</sup>C NMR (101 MHz, CDCl<sub>3</sub>):**  $\delta$  166.7, 146.0, 138.3, 133.0, 130.5, 129.7, 128.5, 128.4, 127.3, 126.2, 124.3, 64.4, 42.4, 32.2, 21.4.

**(*S,E*)-(7-chlorohept-3-en-2-yl)benzene (3k)**

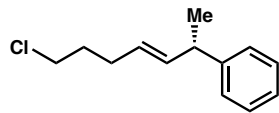

Prepared from (*E*)-1-bromo-5-chloropent-1-ene (**1k**, 37 mg, 0.2 mmol) and 1,3-dioxoisindolin-2-yl 2-phenylpropanoate (**2**, 59 mg, 0.2 mmol) according to General Procedure 3. The crude residue was purified by column chromatography (silica gel, hexane) to yield **3k** (29 mg, 69% yield) in 91% ee as a colorless oil.

$R_f = 0.29$  (silica gel, hexane, UV/CAM).

**Chiral SFC:** (OD-H, 2.5 mL/min, 1% IPA in CO<sub>2</sub>,  $\lambda = 210$  nm):  $t_R$  (minor) = 5.4 min,  $t_R$  (major) = 6.0 min.

$[\alpha]_D^{25} = +9^\circ$  (c = 1.0, CHCl<sub>3</sub>).

**<sup>1</sup>H NMR (400 MHz, CDCl<sub>3</sub>):**  $\delta$  7.35 – 7.29 (m, 2H), 7.25 – 7.18 (m, 3H), 5.69 (ddt,  $J = 15.3, 6.8, 1.4$  Hz, 1H), 5.43 (dtd,  $J = 15.1, 6.8, 1.1$  Hz, 1H), 3.54 (t,  $J = 6.7$  Hz, 2H), 3.50 – 3.40 (m, 1H), 2.23 – 2.16 (m, 2H), 1.90 – 1.82 (m, 2H), 1.36 (d,  $J = 7.0$  Hz, 3H).

**<sup>13</sup>C NMR (101 MHz, CDCl<sub>3</sub>):**  $\delta$  146.3, 136.7, 128.5, 127.24, 127.17, 126.1, 44.6, 42.4, 32.4, 29.7, 21.6.

**FTIR (NaCl, thin film, cm<sup>-1</sup>):** 3025, 2962, 2929, 2871, 1601, 1492, 1450, 1371, 1297, 1017, 969, 759, 698.

**HRMS (FAB,  $m/z$ ):** calc'd for C<sub>13</sub>H<sub>17</sub>Cl [M-H<sub>2</sub>+H]<sup>+</sup>: 207.0940; found: 207.0910.

**(*S,E*)-dec-3-en-2-ylbenzene (31)**

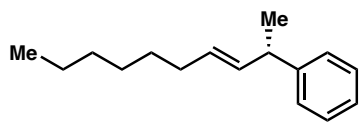

Prepared from (*E*)-1-bromooct-1-ene (**11**, 38 mg, 0.2 mmol) and 1,3-dioxoisindolin-2-yl 2-phenylpropanoate (**2**, 59 mg, 0.2 mmol) according to General Procedure 3. The crude residue was purified by column chromatography (silica gel, hexane) to yield **31** (31 mg, 72% yield) in 94% ee as a colorless oil.

$R_f = 0.59$  (silica gel, hexane, UV/CAM).

**Chiral SFC:** (OJ-H, 2.5 mL/min, 1% IPA in CO<sub>2</sub>,  $\lambda = 210$  nm):  $t_R$  (minor) = 3.9 min,  $t_R$  (major) = 4.5 min.

$[\alpha]_D^{25} = +4^\circ$  (c = 0.9, CHCl<sub>3</sub>).

**<sup>1</sup>H NMR (400 MHz, CDCl<sub>3</sub>):**  $\delta$  7.34 – 7.27 (m, 2H), 7.25 – 7.15 (m, 3H), 5.60 (ddt,  $J = 15.3, 6.6, 1.4$  Hz, 1H), 5.46 (dtd,  $J = 15.1, 6.6, 1.2$  Hz, 1H), 3.47 – 3.38 (m, 1H), 2.06 – 1.97 (m, 2H), 1.40 – 1.22 (m, 11H), 0.95 – 0.83 (m, 3H).

**<sup>13</sup>C NMR (101 MHz, CDCl<sub>3</sub>):**  $\delta$  146.7, 135.0, 129.5, 128.4, 127.3, 126.0, 42.4, 32.7, 31.9, 29.6, 29.0, 22.8, 21.7, 14.3.

**FTIR (NaCl, thin film, cm<sup>-1</sup>):** 3025, 2959, 2925, 2854, 1492, 1451, 1371, 1016, 965, 758, 697.

**LRMS (GC-MS,  $m/z$ ):** calc'd for C<sub>16</sub>H<sub>24</sub> [M]<sup>+</sup>: 216.2; found: 216.2.

**(*S,E*)-trimethyl((5-phenylhex-3-en-1-yl)oxy)silane (**3m**)**

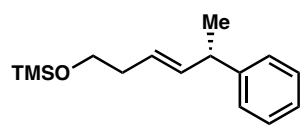

Prepared from (*E*)-4-bromobut-3-en-1-ol (**1m**, 30 mg, 0.2 mmol) and 1,3-dioxoisindolin-2-yl 2-phenylpropanoate (**2**, 59 mg, 0.2 mmol) according to General Procedure 3 with the exception that 2.0 equiv TMSBr was used instead of 1.0 equiv. The reaction was quenched with water instead of 1 M HCl to prevent decomposition of the primary silyl ether. *Note: An acidic workup yielded a mixture of the silyl ether and alcohol product, however the alcohol was inseparable from the phthalimide byproduct.* The crude residue was purified by column chromatography (florisil, hexane to 1% Et<sub>2</sub>O/hexane) to yield **3m** (33 mg, 66% yield) as a colorless oil. *Note: The two enantiomers of the racemic silyl ether were inseparable by chiral SFC.*

$R_f = 0.67$  (silica gel, 10% EtOAc/hexane, UV/CAM).

$[\alpha]_D^{25} = +6^\circ$  ( $c = 1.0$ , CHCl<sub>3</sub>).

**<sup>1</sup>H NMR (400 MHz, CDCl<sub>3</sub>):**  $\delta$  7.35 – 7.28 (m, 2H), 7.25 – 7.17 (m, 3H), 5.69 (ddt,  $J = 15.4, 6.7, 1.3$  Hz, 1H), 5.47 (dtd,  $J = 15.3, 6.9, 1.4$  Hz, 1H), 3.61 (t,  $J = 7.0$  Hz, 2H), 3.49 – 3.40 (m, 1H), 2.28 (qt,  $J = 7.0, 1.1$  Hz, 2H), 1.36 (d,  $J = 7.1$  Hz, 3H), 0.13 (s, 9H).

**<sup>13</sup>C NMR (101 MHz, CDCl<sub>3</sub>):**  $\delta$  146.3, 137.3, 128.5, 127.3, 126.1, 125.4, 62.7, 42.5, 36.2, 21.5, -0.3.

**FTIR (NaCl, thin film, cm<sup>-1</sup>):** 2961, 2930, 2902, 2863, 1602, 1493, 1452, 1382, 1251, 1094, 968, 940, 876, 841, 758, 748, 699.

**HRMS (FAB,  $m/z$ ):** calc'd for C<sub>15</sub>H<sub>24</sub>OSi  $[M+H]^+$ : 249.1675; found: 249.1684.

**(*S,E*)-5-phenylhex-3-en-1-ol (**S7**)**

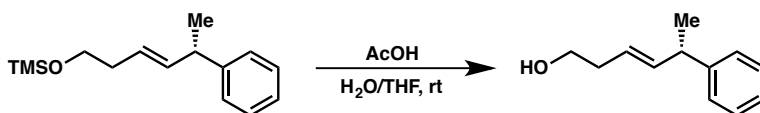

**Deprotection of Silyl Ether:** Silyl ether **3m** (33.0 mg, 0.132 mmol, 1 equiv) was dissolved in a solution of acetic acid (0.5 mL), water (0.5 mL), and THF (2.5 mL) in a 20 mL vial equipped with a magnetic stir bar and stirred at room temperature for 15 min. The reaction was slowly quenched with a solution of saturated NaHCO<sub>3</sub> until the pH was slightly basic (approx. 15 mL),

extracted with Et<sub>2</sub>O (3 x 10 mL), dried with MgSO<sub>4</sub>, filtered, and concentrated under reduced pressure to yield **S7** (22.6 mg, 97% yield) in 89% ee as a colorless oil. Spectral data matched those reported in literature.<sup>13</sup>

**R<sub>f</sub>** = 0.11 (silica gel, 10% EtOAc/hexane, UV/CAM).

**Chiral SFC:** (OB-H, 2.5 mL/min, 3% IPA in CO<sub>2</sub>, λ = 210 nm): *t<sub>R</sub>* (minor) = 6.9 min, *t<sub>R</sub>* (major) = 7.5 min.

[α]<sub>D</sub><sup>25</sup> = +9° (c = 1.0, CHCl<sub>3</sub>).

**<sup>1</sup>H NMR (400 MHz, CDCl<sub>3</sub>):** δ 7.34 – 7.27 (m, 2H), 7.25 – 7.16 (m, 3H), 5.76 (ddt, *J* = 15.4, 6.7, 1.4 Hz, 1H), 5.45 (dtd, *J* = 15.3, 7.0, 1.4 Hz, 1H), 3.65 (t, *J* = 6.3 Hz, 2H), 3.52 – 3.42 (m, 1H), 2.30 (q, *J* = 6.3 Hz, 2H), 1.54 (s, 1H), 1.37 (d, *J* = 7.1 Hz, 3H).

**<sup>13</sup>C NMR (101 MHz, CDCl<sub>3</sub>):** δ 146.1, 138.8, 128.6, 127.2, 126.2, 124.8, 62.2, 42.5, 36.0, 21.6.

**(*S,E*)-6-methyl-2-(3-phenylbut-1-en-1-yl)-1,3,6,2-dioxazaborocane-4,8-dione (**3n**)**

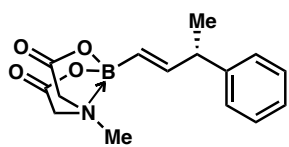

Prepared from *trans*-1-bromovinylboronic acid MIDA ester (**1n**, 52 mg, 0.2 mmol) and 1,3-dioxoisoindolin-2-yl 2-phenylpropanoate (**2**, 59 mg, 0.2 mmol) according to General Procedure 3. The crude residue was purified by column chromatography (silica gel, 10% EtOAc/hexane to 100% EtOAc) to yield **3n** (25 mg, 43% yield) in 97% ee as a yellow solid. *Note: The <sup>1</sup>H NMR contains two minor impurities that were identified as DMA and methyliminodiacetic acid.*

$R_f$  = 0.35 (silica gel, EtOAc, UV/KMnO<sub>4</sub>).

m.p. = 144–146 °C

**Chiral SFC:** (OJ-H, 2.5 mL/min, 30% IPA in CO<sub>2</sub>,  $\lambda$  = 210 nm):  $t_R$  (major) = 5.5 min,  $t_R$  (minor) = 10.2 min.

$[\alpha]_D^{25}$  = +0.5° ± 1.1° (c = 1.0, CHCl<sub>3</sub>). *Note: This compound shows low optical rotation.*

**<sup>1</sup>H NMR (400 MHz, CDCl<sub>3</sub>):**  $\delta$  7.32 – 7.23 (m, 2H), 7.21 – 7.13 (m, 3H), 6.32 (dd,  $J$  = 17.7, 6.4 Hz, 1H), 5.38 (dd,  $J$  = 17.7, 1.5 Hz, 1H), 3.92 (dd,  $J$  = 16.7, 4.5 Hz, 2H), 3.59 (dd,  $J$  = 16.8, 13.9 Hz, 2H), 3.54 – 3.46 (m, 1H), 2.69 (s, 3H), 1.36 (d,  $J$  = 7.0 Hz, 3H).

**<sup>13</sup>C NMR (101 MHz, CDCl<sub>3</sub>):**  $\delta$  168.34, 168.27, 151.7, 145.3, 128.6, 127.4, 126.3, 61.53, 61.49, 47.0, 44.8, 20.8.

**FTIR (NaCl, thin film, cm<sup>-1</sup>):** 2963, 1762, 1636, 1492, 1338, 1290, 1246, 1193, 1154, 1126, 1090, 1025, 1007, 956, 867, 761, 702.

**HRMS (FAB,  $m/z$ ):** calc'd for C<sub>15</sub>H<sub>18</sub>BNO<sub>4</sub> [M+H]<sup>+</sup>: 288.1407; found: 288.1414.

**(*S,E*)-trimethyl(3-phenylbut-1-en-1-yl)silane (**3o**)**

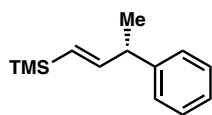

Prepared from (*E*)-(2-bromovinyl)trimethylsilane (**1o**, 36 mg, 0.2 mmol) and 1,3-dioxoisindolin-2-yl 2-phenylpropanoate (**2**, 59 mg, 0.2 mmol) according to General Procedure 3. Vinyl bromide **1o** is reported to be air sensitive, and was added to the reaction while inside the glovebox. The crude residue was purified by column chromatography (silica gel, hexane) to yield **3o** (28 mg, 68% yield) in 97% ee as a colorless oil.

$R_f = 0.65$  (silica gel, hexane, UV/CAM).

**Chiral SFC:** (OJ-H, 2.5 mL/min, CO<sub>2</sub>,  $\lambda = 210$  nm):  $t_R$  (major) = 1.8 min,  $t_R$  (minor) = 2.0 min.

$[\alpha]_D^{25} = -2.4^\circ \pm 0.2^\circ$  (c = 0.9, CHCl<sub>3</sub>).

**<sup>1</sup>H NMR (400 MHz, CDCl<sub>3</sub>):**  $\delta$  7.35 – 7.28 (m, 2H), 7.24 – 7.18 (m, 3H), 6.19 (dd,  $J = 18.6, 5.9$  Hz, 1H), 5.68 (dd,  $J = 18.6, 1.6$  Hz, 1H), 3.52 – 3.44 (m, 1H), 1.36 (d,  $J = 7.0$  Hz, 3H), 0.06 (s, 9H).

**<sup>13</sup>C NMR (101 MHz, CDCl<sub>3</sub>):**  $\delta$  150.8, 145.8, 128.5, 128.1, 127.5, 126.2, 45.6, 20.9, -1.0.

**FTIR (NaCl, thin film, cm<sup>-1</sup>):** 3028, 2958, 1612, 1602, 1492, 1452, 1248, 1009, 987, 868, 837, 759, 698.

**LRMS (GC-MS,  $m/z$ ):** calc'd for C<sub>13</sub>H<sub>20</sub>Si [M]<sup>+</sup>: 204.1; found: 204.1.

**(*S,E*)-4,4'-(but-1-ene-1,3-diyl)bis(methoxybenzene) (7a)**

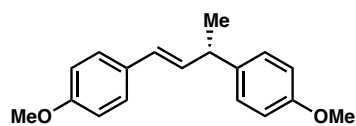

Prepared from (*E*)-1-(2-bromovinyl)-4-methoxybenzene (**1a**, 43 mg, 0.2 mmol) and 1,3-dioxoisindolin-2-yl 2-(4-methoxyphenyl)propanoate (**6a**, 65 mg, 0.2 mmol) according to General Procedure 3. The crude residue was purified by column chromatography (silica gel, 10% toluene/hexane then 10% Et<sub>2</sub>O/hexane) to yield **7a** (42 mg, 78% yield) in 93% ee as a white solid. Spectral data matched those reported in literature.<sup>13</sup>

$R_f$  = 0.45 (silica gel, 10% EtOAc/hexane, UV).

m.p. = 51–59 °C

**Chiral SFC:** (AD-H, 2.5 mL/min, 20% IPA in CO<sub>2</sub>,  $\lambda$  = 235 nm):  $t_R$  (major) = 7.0 min,  $t_R$  (minor) = 8.5 min.

$[\alpha]_D^{25} = -34^\circ$  (c = 1.0, CHCl<sub>3</sub>).

**<sup>1</sup>H NMR (400 MHz, CDCl<sub>3</sub>):**  $\delta$  7.32 (d,  $J$  = 8.7 Hz, 2H), 7.22 (d,  $J$  = 8.5 Hz, 2H), 6.89 (d,  $J$  = 8.8 Hz, 2H), 6.86 (d,  $J$  = 8.8 Hz, 2H), 6.37 (d,  $J$  = 16.0 Hz, 1H), 6.25 (dd,  $J$  = 15.9, 6.6 Hz, 1H), 3.82 (s, 3H), 3.81 (s, 3H), 3.65 – 3.55 (m, 1H), 1.46 (d,  $J$  = 7.0 Hz, 3H).

**<sup>13</sup>C NMR (101 MHz, CDCl<sub>3</sub>):**  $\delta$  158.9, 158.0, 138.1, 133.6, 130.5, 128.3, 127.7, 127.3, 114.0, 113.9, 55.4 (2C), 41.8, 21.6.



**(*S,E*)-1-methoxy-4-(3-(4-(trifluoromethyl)phenyl)but-1-en-1-yl)benzene (7b)**

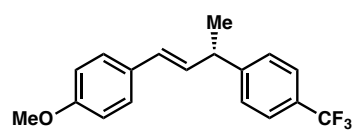

Prepared from (*E*)-1-(2-bromovinyl)-4-methoxybenzene (**1a**, 43 mg, 0.2 mmol) and 1,3-dioxoisindolin-2-yl 2-(4-(trifluoromethyl)phenyl)propanoate (**6b**, 73 mg, 0.2 mmol) according to General Procedure 3. The crude residue was purified by column chromatography (silica gel, 5% toluene/hexane) to yield **7b** (40 mg, 65% yield) in 88% ee as a white solid.

$R_f = 0.48$  (silica gel, 10% EtOAc/hexane, UV).

m.p. = 67–70 °C

**Chiral SFC:** (OB-H, 2.5 mL/min, 5% IPA in CO<sub>2</sub>,  $\lambda = 254$  nm):  $t_R$  (major) = 6.5 min,  $t_R$  (minor) = 7.5 min.

$[\alpha]_D^{25} = -39^\circ$  ( $c = 1.0$ , CHCl<sub>3</sub>).

**<sup>1</sup>H NMR (400 MHz, CDCl<sub>3</sub>):**  $\delta$  7.58 (d,  $J = 8.1$  Hz, 2H), 7.39 (d,  $J = 8.4$  Hz, 2H), 7.30 (d,  $J = 8.7$  Hz, 2H), 6.85 (d,  $J = 8.8$  Hz, 2H), 6.38 (d,  $J = 16.0$  Hz, 1H), 6.21 (dd,  $J = 15.9, 6.8$  Hz, 1H), 3.81 (s, 3H), 3.73 – 3.64 (m, 1H), 1.48 (d,  $J = 7.0$  Hz, 3H).

**<sup>13</sup>C NMR (101 MHz, CDCl<sub>3</sub>):**  $\delta$  159.1, 150.1 (q,  $J_{C-F} = 1.4$  Hz), 132.0, 130.1, 128.8, 128.6 (q,  $J_{C-F} = 32.3$  Hz), 127.8, 127.4, 125.5 (q,  $J_{C-F} = 3.8$  Hz), 124.5 (q,  $J_{C-F} = 271.9$  Hz), 114.1, 55.4, 42.6, 21.3.

**<sup>19</sup>F NMR (282 MHz, CDCl<sub>3</sub>):**  $\delta$  -65.4.

**FTIR (NaCl, thin film, cm<sup>-1</sup>):** 2965, 1608, 1512, 1252, 1174, 1164, 1122, 1069, 1036, 1016, 967, 840, 818.

**HRMS (EI,  $m/z$ ):** calc'd for C<sub>18</sub>H<sub>17</sub>F<sub>3</sub>O [ $M^+$ ]<sup>+</sup>: 306.1232; found: 306.1241.

**(*S,E*)-1-bromo-4-(4-(4-methoxyphenyl)but-3-en-2-yl)benzene (7c)**

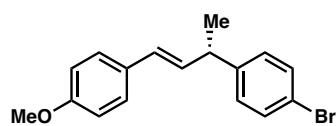

Prepared from (*E*)-1-(2-bromovinyl)-4-methoxybenzene (**1a**, 43 mg, 0.2 mmol) and 1,3-dioxoisindolin-2-yl 2-(4-bromophenyl)propanoate (**6c**, 75 mg, 0.2 mmol) according to General Procedure 3.

The crude residue was purified by column chromatography (silica gel, 5 to 10% toluene/hexane) to yield **7c** (51 mg, 80% yield) in 90% ee as a white solid. Spectral data matched those reported in literature.<sup>13</sup>

$R_f$  = 0.59 (silica gel, 10% EtOAc/hexane, UV).

m.p. = 74–76 °C

**Chiral SFC:** (OB-H, 2.5 mL/min, 35% IPA in CO<sub>2</sub>,  $\lambda$  = 254 nm):  $t_R$  (major) = 5.3 min,  $t_R$  (minor) = 8.5 min.

$[\alpha]_D^{25} = -32^\circ$  (c = 1.0, CHCl<sub>3</sub>).

**<sup>1</sup>H NMR (400 MHz, CDCl<sub>3</sub>):**  $\delta$  7.45 (d,  $J$  = 8.5 Hz, 2H), 7.30 (d,  $J$  = 8.6 Hz, 2H), 7.16 (d,  $J$  = 8.3 Hz, 2H), 6.86 (d,  $J$  = 8.8 Hz, 2H), 6.36 (d,  $J$  = 16.0 Hz, 1H), 6.20 (dd,  $J$  = 15.9, 6.7 Hz, 1H), 3.81 (s, 3H), 3.64 – 3.55 (m, 1H), 1.45 (d,  $J$  = 7.0 Hz, 3H).

**<sup>13</sup>C NMR (101 MHz, CDCl<sub>3</sub>):**  $\delta$  159.0, 145.0, 132.5, 131.6, 130.2, 129.2, 128.4, 127.4, 120.0, 114.0, 55.4, 42.1, 21.3.

**(*S,E*)-1-fluoro-4-(4-(4-methoxyphenyl)but-3-en-2-yl)benzene (7d)**

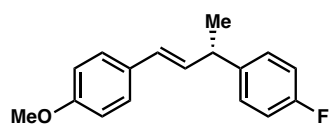

Prepared from (*E*)-1-(2-bromovinyl)-4-methoxybenzene (**1a**, 43 mg, 0.2 mmol) and 1,3-dioxoisindolin-2-yl 2-(4-fluorophenyl)propanoate (**6d**, 63 mg, 0.2 mmol) according to General Procedure 3.

The crude residue was purified by column chromatography (silica gel, 5 to 30% toluene/hexane) to yield **7d** (44 mg, 85% yield) in 92% ee as a colorless oil. Spectral data matched those reported in literature.<sup>13</sup>

$R_f = 0.70$  (silica gel, 10% EtOAc/hexane, UV).

**Chiral SFC:** (OB-H, 2.5 mL/min, 15% IPA in CO<sub>2</sub>,  $\lambda = 280$  nm):  $t_R$  (major) = 5.9 min,  $t_R$  (minor) = 8.3 min.

$[\alpha]_D^{25} = -29^\circ$  ( $c = 1.0$ , CHCl<sub>3</sub>).

**<sup>1</sup>H NMR (400 MHz, CDCl<sub>3</sub>):**  $\delta$  7.34 – 7.28 (m, 2H), 7.28 – 7.20 (m, 2H), 7.06 – 6.98 (m, 2H), 6.89 – 6.83 (m, 2H), 6.40 – 6.32 (m, 1H), 6.23 (dd,  $J = 15.9, 6.7$  Hz, 1H), 3.81 (s, 3H), 3.67 – 3.58 (m, 1H), 1.46 (d,  $J = 7.0$  Hz, 3H).

**<sup>13</sup>C NMR (101 MHz, CDCl<sub>3</sub>):**  $\delta$  161.5 (d,  $J_{C-F} = 243.7$  Hz), 159.0, 141.6 (d,  $J_{C-F} = 3.1$  Hz), 133.0, 130.3, 128.8 (d,  $J_{C-F} = 7.8$  Hz), 128.1, 127.4, 115.3 (d,  $J_{C-F} = 21.2$  Hz), 114.1, 55.4, 41.9, 21.6.

**<sup>19</sup>F NMR (282 MHz, CDCl<sub>3</sub>):**  $\delta$  -123.56 (tt,  $J_{F-H} = 8.9, 5.4$  Hz).

**(*S,E*)-4-(4-(4-methoxyphenyl)but-3-en-2-yl)-*N,N*-dimethylaniline (7e)**

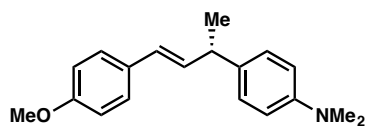

Prepared from (*E*)-1-(2-bromovinyl)-4-methoxybenzene (**1a**, 43 mg, 0.2 mmol) and 1,3-dioxisoindolin-2-yl 2-(4-(dimethylamino)phenyl)propanoate (**6e**, 68 mg, 0.2 mmol) according to General Procedure 3. The reaction was quenched with water instead of 1 M HCl. The crude residue was purified by column chromatography (silica gel, hexane to 10% Et<sub>2</sub>O/hexane) to yield **7e** (37 mg, 66% yield) in 94% ee as a white solid.

$R_f = 0.28$  (silica gel, 10% EtOAc/hexane, UV).

m.p. = 72–75 °C

**Chiral SFC:** (AD-H, 2.5 mL/min, 20% IPA in CO<sub>2</sub>,  $\lambda = 280$  nm):  $t_R$  (major) = 8.2 min,  $t_R$  (minor) = 10.6 min.

$[\alpha]_D^{25} = -29^\circ$  (c = 1.1, CHCl<sub>3</sub>).

**<sup>1</sup>H NMR (400 MHz, CDCl<sub>3</sub>):**  $\delta$  7.29 (d,  $J = 8.7$  Hz, 2H), 7.15 (d,  $J = 8.5$  Hz, 2H), 6.83 (d,  $J = 8.8$  Hz, 2H), 6.73 (d,  $J = 8.7$  Hz, 2H), 6.34 (dd,  $J = 16.2, 0.8$  Hz, 1H), 6.23 (dd,  $J = 15.9, 6.6$  Hz, 1H), 3.80 (s, 3H), 3.58 – 3.50 (m, 1H), 2.93 (s, 6H), 1.42 (d,  $J = 7.1$  Hz, 3H).

**<sup>13</sup>C NMR (101 MHz, CDCl<sub>3</sub>):**  $\delta$  158.8, 149.3, 134.1, 130.7, 128.0, 127.3, 114.0, 113.1, 55.4, 41.6, 41.0, 21.5.

**FTIR (NaCl, thin film, cm<sup>-1</sup>):** 2958, 1608, 1518, 1509, 1456, 1341, 1249, 1173, 1034, 966, 948, 815.

**HRMS (FAB,  $m/z$ ):** calc'd for C<sub>19</sub>H<sub>23</sub>NO [M+·]<sup>+</sup>: 281.1780; found: 281.1774.

**(*S,E*)-1,2-dichloro-4-(4-(4-methoxyphenyl)but-3-en-2-yl)benzene (7f)**

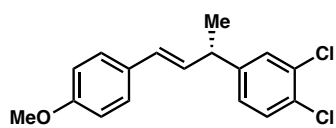

Prepared from (*E*)-1-(2-bromovinyl)-4-methoxybenzene (**1a**, 43 mg, 0.2 mmol) and 1,3-dioxisoindolin-2-yl 2-(3,4-dichlorophenyl)propanoate (**6f**, 73 mg, 0.2 mmol) according to General Procedure 3.

The crude residue was purified by column chromatography (silica gel, hexane to 5% Et<sub>2</sub>O/hexane) to yield **7f** (48 mg, 77% yield) in 82% ee as a colorless oil.

$R_f = 0.51$  (silica gel, 10% EtOAc/hexane, UV).

**Chiral SFC:** (OB-H, 2.5 mL/min, 25% IPA in CO<sub>2</sub>,  $\lambda = 280$  nm):  $t_R$  (major) = 6.5 min,  $t_R$  (minor) = 9.0 min.

$[\alpha]_D^{25} = -26^\circ$  ( $c = 1.1$ , CHCl<sub>3</sub>).

**<sup>1</sup>H NMR (400 MHz, CDCl<sub>3</sub>):**  $\delta$  7.37 (d,  $J = 8.3$  Hz, 1H), 7.35 (d,  $J = 2.1$  Hz, 1H), 7.32 – 7.27 (m, 2H), 7.10 (ddd,  $J = 8.2, 2.1, 0.6$  Hz, 1H), 6.87 – 6.82 (m, 2H), 6.35 (dd,  $J = 15.9, 1.3$  Hz, 1H), 6.15 (dd,  $J = 15.9, 6.8$  Hz, 1H), 3.81 (s, 3H), 3.62 – 3.53 (m, 1H), 1.43 (d,  $J = 7.0$  Hz, 3H).

**<sup>13</sup>C NMR (101 MHz, CDCl<sub>3</sub>):**  $\delta$  159.2, 146.3, 132.4, 131.7, 130.5, 130.1, 130.0, 129.4, 128.9, 127.4, 127.0, 114.1, 55.4, 41.9, 21.2.

**FTIR (NaCl, thin film, cm<sup>-1</sup>):** 2964, 1607, 1511, 1466, 1299, 1250, 1174, 1106, 1030, 967, 815.

**HRMS (FAB,  $m/z$ ):** calc'd for C<sub>17</sub>H<sub>16</sub>Cl<sub>2</sub>O [M<sup>+</sup>]<sup>+</sup>: 306.0578; found: 306.0582.

**(*S,E*)-1-methoxy-4-(3-phenylpent-1-en-1-yl)benzene (7g)**

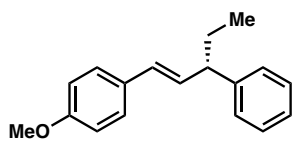

Prepared from (*E*)-1-(2-bromovinyl)-4-methoxybenzene (**1a**, 43 mg, 0.2 mmol) and 1,3-dioxoisindolin-2-yl 2-phenylbutanoate (**6g**, 62 mg, 0.2 mmol) according to General Procedure 3. The crude residue was purified by column chromatography (silica gel, 10 to 20% toluene/hexane) to yield **7g** (40 mg, 80% yield) in 97% ee as a colorless oil. Spectral data matched those reported in literature.<sup>13</sup>

$R_f = 0.59$  (silica gel, 10% EtOAc/hexane, UV).

**Chiral SFC:** (OB-H, 2.5 mL/min, 15% IPA in CO<sub>2</sub>,  $\lambda = 254$  nm):  $t_R$  (minor) = 8.0 min,  $t_R$  (major) = 9.9 min.

$[\alpha]_D^{25} = -46^\circ$  (c = 1.0, CHCl<sub>3</sub>).

**<sup>1</sup>H NMR (400 MHz, CDCl<sub>3</sub>):**  $\delta$  7.37 – 7.19 (m, 7H), 6.84 (d,  $J = 8.8$  Hz, 2H), 6.37 (d,  $J = 15.8$  Hz, 1H), 6.21 (dd,  $J = 15.8, 7.8$  Hz, 1H), 3.80 (s, 3H), 3.35 – 3.26 (m, 1H), 1.90 – 1.78 (m, 2H), 0.93 (t,  $J = 7.4$  Hz, 3H).

**<sup>13</sup>C NMR (101 MHz, CDCl<sub>3</sub>):**  $\delta$  158.9, 144.9, 132.2, 130.6, 128.9, 128.6, 127.8, 127.3, 126.2, 114.0, 55.4, 51.1, 29.0, 12.5.

**(*S,E*)-(4-(4-methoxyphenyl)but-3-ene-1,2-diyl)dibenzene (7h)**

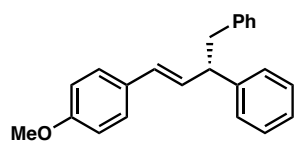

Prepared from (*E*)-1-(2-bromovinyl)-4-methoxybenzene (**1a**, 43 mg, 0.2 mmol) and 1,3-dioxisoindolin-2-yl 2,3-diphenylpropanoate (**6h**, 74 mg, 0.2 mmol) according to General Procedure 3. The crude residue was purified by column chromatography (silica gel, 10% toluene/hexane then 10% Et<sub>2</sub>O/hexane) to yield **7h** (49 mg, 78% yield) in 95% ee as a white solid. Spectral data matched those reported in literature.<sup>13</sup>

$R_f = 0.48$  (silica gel, 10% EtOAc/hexane, UV).

m.p. = 72–73 °C

**Chiral SFC:** (AS-H, 2.5 mL/min, 10% IPA in CO<sub>2</sub>,  $\lambda = 254$  nm):  $t_R$  (minor) = 6.0 min,  $t_R$  (major) = 6.5 min.

$[\alpha]_D^{25} = +19^\circ$  (c = 1.0, CHCl<sub>3</sub>).

**<sup>1</sup>H NMR (400 MHz, CDCl<sub>3</sub>):**  $\delta$  7.34 – 7.13 (m, 10H), 7.10 (d,  $J = 8.8$  Hz, 2H), 6.83 (d,  $J = 8.8$  Hz, 2H), 6.30 (dd,  $J = 15.9, 6.3$  Hz, 1H), 6.25 (d,  $J = 15.9$  Hz, 1H), 3.80 (s, 3H), 3.78 – 3.67 (m, 1H), 3.19 – 3.06 (m, 2H).

**<sup>13</sup>C NMR (101 MHz, CDCl<sub>3</sub>):**  $\delta$  158.9, 144.1, 140.2, 131.3, 130.4, 129.53, 129.49, 128.5, 128.2, 128.0, 127.4, 126.4, 126.0, 114.0, 55.4, 51.0, 42.9.

**(*S,E*)-1-methoxy-4-(4-methyl-3-phenylpent-1-en-1-yl)benzene (7i)**

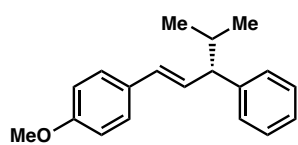

Prepared from (*E*)-1-(2-bromovinyl)-4-methoxybenzene (**1a**, 43 mg, 0.2 mmol) and 1,3-dioxoisindolin-2-yl 3-methyl-2-phenylbutanoate (**6i**, 65 mg, 0.2 mmol) according to General Procedure 3. The crude residue was purified by column chromatography (silica gel, 10 to 20% toluene/hexane) to yield **7i** (25 mg, 47% yield) in 97% ee as a white solid.

$R_f$  = 0.58 (silica gel, 10% EtOAc/hexane, UV).

m.p. = 67–68 °C

**Chiral SFC:** (AS-H, 2.5 mL/min, 10% IPA in CO<sub>2</sub>,  $\lambda$  = 254 nm):  $t_R$  (minor) = 4.8 min,  $t_R$  (major) = 6.1 min.

$[\alpha]_D^{25} = -39^\circ$  (c = 1.0, CHCl<sub>3</sub>).

**<sup>1</sup>H NMR (400 MHz, CDCl<sub>3</sub>):**  $\delta$  7.34 – 7.28 (m, 4H), 7.26 – 7.17 (m, 3H), 6.84 (d,  $J$  = 8.8 Hz, 2H), 6.36 (d,  $J$  = 15.7 Hz, 1H), 6.26 (dd,  $J$  = 15.7, 8.8 Hz, 1H), 3.80 (s, 3H), 3.04 (t,  $J$  = 8.8 Hz, 1H), 2.14 – 1.96 (m, 1H), 1.02 (d,  $J$  = 6.7 Hz, 3H), 0.82 (d,  $J$  = 6.6 Hz, 3H).

**<sup>13</sup>C NMR (101 MHz, CDCl<sub>3</sub>):**  $\delta$  158.9, 144.7, 131.2, 130.6, 129.8, 128.5, 128.1, 127.3, 126.1, 114.0, 57.8, 55.4, 33.4, 21.3, 21.1.

**FTIR (NaCl, thin film, cm<sup>-1</sup>):** 2953, 1600, 1509, 1450, 1251, 1027, 966, 838, 701.

**LRMS (GC-MS,  $m/z$ ):** calc'd for C<sub>19</sub>H<sub>22</sub>O [M]<sup>+</sup>: 266.2; found: 266.1.



**(*S,E*)-tert-butyl((4-(4-methoxyphenyl)-2-phenylbut-3-en-1-yl)oxy)dimethylsilane (7j)**

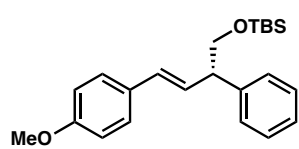

Prepared from (*E*)-1-(2-bromovinyl)-4-methoxybenzene (**1a**, 43 mg, 0.2 mmol) and 1,3-dioxoisindolin-2-yl 3-((*tert*-butyldimethylsilyl)oxy)-2-phenylpropanoate (**6j**, 74 mg, 0.2 mmol) according to General Procedure 3. The crude residue was purified by column chromatography (silica gel, 10% toluene/hexane then 10% Et<sub>2</sub>O/hexane) to yield **7j** (43 mg, 58% yield) in 98% ee as a colorless oil.

$R_f$  = 0.55 (silica gel, 10% EtOAc/hexane, UV).

**Chiral SFC:** (OJ-H, 2.5 mL/min, 10% IPA in CO<sub>2</sub>,  $\lambda$  = 254 nm):  $t_R$  (major) = 3.4 min,  $t_R$  (minor) = 5.8 min.

$[\alpha]_D^{25} = -14^\circ$  (c = 1.0, CHCl<sub>3</sub>).

**<sup>1</sup>H NMR (400 MHz, CDCl<sub>3</sub>):**  $\delta$  7.39 – 7.29 (m, 6H), 7.28 – 7.23 (m, 1H), 6.87 (d,  $J$  = 8.8 Hz, 2H), 6.44 (d,  $J$  = 16.0 Hz, 1H), 6.34 (dd,  $J$  = 15.9, 7.2 Hz, 1H), 3.98 – 3.89 (m, 2H), 3.83 (s, 3H), 3.70 – 3.63 (m, 1H), 0.89 (s, 9H), 0.02 (s, 3H), 0.01 (s, 3H).

**<sup>13</sup>C NMR (101 MHz, CDCl<sub>3</sub>):**  $\delta$  159.0, 142.3, 130.7, 130.5, 128.8, 128.45, 128.42, 127.4, 126.6, 114.0, 67.5, 55.4, 51.8, 26.0, 18.4, -5.2, -5.3.

**FTIR (NaCl, thin film, cm<sup>-1</sup>):** 2953, 2928, 2892, 2855, 1607, 1511, 1463, 1250, 1174, 1106, 1036, 836, 775, 699.

**HRMS (FAB,  $m/z$ ):** calc'd for C<sub>23</sub>H<sub>32</sub>O<sub>2</sub>Si [M-H<sub>2</sub>+H]<sup>+</sup>: 367.2093; found: 367.2081.

**(*S,E*)-1-methoxy-4-(3-phenylhexa-1,5-dien-1-yl)benzene (7k)**

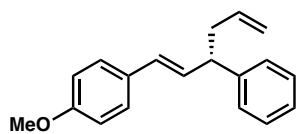

Prepared from (*E*)-1-(2-bromovinyl)-4-methoxybenzene (**1a**, 43 mg, 0.2 mmol) and 1,3-dioxisoindolin-2-yl 2-phenylpent-4-enoate (**6k**, 53 mg, 0.2 mmol) according to General Procedure 3. The crude residue was purified by column chromatography (silica gel, 5 to 20% toluene/hexane) to yield **7k** (42 mg, 79% yield) in 96% ee as a colorless oil.

$R_f = 0.55$  (silica gel, 10% EtOAc/hexane, UV).

**Chiral SFC:** (OJ-H, 2.5 mL/min, 10% IPA in CO<sub>2</sub>,  $\lambda = 254$  nm):  $t_R$  (minor) = 7.8 min,  $t_R$  (major) = 8.5 min.

$[\alpha]_D^{25} = -19^\circ$  (c = 1.0, CHCl<sub>3</sub>).

**<sup>1</sup>H NMR (400 MHz, CDCl<sub>3</sub>):**  $\delta$  7.31 – 7.14 (m, 7H), 6.78 (d,  $J = 8.8$  Hz, 2H), 6.30 (d,  $J = 15.9$  Hz, 1H), 6.18 (dd,  $J = 15.8, 7.5$  Hz, 1H), 5.73 (ddt,  $J = 17.1, 10.2, 6.9$  Hz, 1H), 5.01 (ddt,  $J = 17.0, 2.0, 1.5$  Hz, 1H), 4.95 (ddt,  $J = 10.2, 2.1, 1.0$  Hz, 1H), 3.74 (s, 3H), 3.50 – 3.42 (m, 1H), 2.57 – 2.51 (m, 2H).

**<sup>13</sup>C NMR (101 MHz, CDCl<sub>3</sub>):**  $\delta$  159.0, 144.2, 136.8, 131.5, 130.4, 129.2, 128.6, 127.8, 127.4, 126.4, 116.4, 114.0, 55.4, 49.1, 40.4.

**FTIR (NaCl, thin film, cm<sup>-1</sup>):** 3025, 2913, 2834, 1606, 1509, 1246, 1173, 1032, 963, 911, 756, 698.

**HRMS (EI,  $m/z$ ):** calc'd for C<sub>19</sub>H<sub>20</sub>O [ $M^{+\cdot}$ ]<sup>+</sup>: 264.1514; found: 264.1521.

**(*S,E*)-1-(6-chloro-3-phenylhex-1-en-1-yl)-4-methoxybenzene (71)**

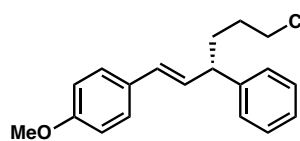

Prepared from (*E*)-1-(2-bromovinyl)-4-methoxybenzene (**1a**, 43 mg, 0.2 mmol) and 1,3-dioxoisindolin-2-yl 5-chloro-2-phenylpentanoate (**6l**, 72 mg, 0.2 mmol) according to General Procedure 3. The crude residue was purified by column chromatography (silica gel, 5% Et<sub>2</sub>O/hexane) to yield **71** (52 mg, 87% yield) in 93% ee as a colorless oil.

$R_f = 0.53$  (silica gel, 10% EtOAc/hexane, UV).

**Chiral SFC:** (AS-H, 2.5 mL/min, 15% IPA in CO<sub>2</sub>,  $\lambda = 254$  nm):  $t_R$  (minor) = 3.7 min,  $t_R$  (major) = 4.7 min.

$[\alpha]_D^{25} = -21^\circ$  ( $c = 1.0$ , CHCl<sub>3</sub>).

**<sup>1</sup>H NMR (400 MHz, CDCl<sub>3</sub>):**  $\delta$  7.37 – 7.21 (m, 7H), 6.85 (d,  $J = 8.8$  Hz, 2H), 6.38 (d,  $J = 15.8$  Hz, 1H), 6.20 (dd,  $J = 15.8, 7.9$  Hz, 1H), 3.81 (s, 3H), 3.56 (t,  $J = 6.5$  Hz, 2H), 3.46 – 3.38 (m, 1H), 2.02 – 1.92 (m, 2H), 1.92 – 1.69 (m, 2H).

**<sup>13</sup>C NMR (101 MHz, CDCl<sub>3</sub>):**  $\delta$  159.0, 144.2, 131.5, 130.2, 129.2, 128.7, 127.7, 127.4, 126.5, 114.0, 55.4, 48.7, 45.2, 33.2, 30.8.

**FTIR (NaCl, thin film, cm<sup>-1</sup>):** 2915, 1605, 1491, 1438, 1509, 1246, 1173, 1031, 964.

**HRMS (FAB,  $m/z$ ):** calc'd for C<sub>19</sub>H<sub>21</sub>ClO [M+]<sup>+</sup>: 300.1281; found: 300.1274.

**(*S,E*)-(3-methoxy-3-phenylprop-1-en-1-yl)trimethylsilane (9)**

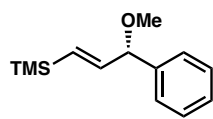

Prepared from (*E*)-(2-bromovinyl)trimethylsilane (**10**, 36 mg, 0.2 mmol) and 1,3-dioxoisindolin-2-yl 2-methoxy-2-phenylacetate (**8**, 62 mg, 0.2 mmol) according to General Procedure 3. The crude residue was purified by column chromatography (silica gel, 0 to 3% Et<sub>2</sub>O/hexane) to yield **9** (26 mg, 59% yield) in 91% ee as a colorless oil.

$R_f = 0.62$  (silica gel, 10% EtOAc/hexane, UV/CAM).

**Chiral SFC:** (OD-H, 2.5 mL/min, 1% IPA in CO<sub>2</sub>,  $\lambda = 210$  nm):  $t_R$  (minor) = 2.6 min,  $t_R$  (major) = 5.9 min.

$[\alpha]_D^{25} = +8^\circ$  (c = 0.6, CHCl<sub>3</sub>).

**<sup>1</sup>H NMR (400 MHz, CDCl<sub>3</sub>):**  $\delta$  7.40 – 7.27 (m, 5H), 6.10 (dd,  $J = 18.6, 5.9$  Hz, 1H), 5.93 (dd,  $J = 18.6, 1.2$  Hz, 1H), 4.61 (d,  $J = 5.8$  Hz, 1H), 3.32 (s, 3H), 0.07 (s, 9H).

**<sup>13</sup>C NMR (101 MHz, CDCl<sub>3</sub>):**  $\delta$  145.7, 140.9, 131.9, 128.6, 127.7, 127.1, 86.6, 56.6, -1.2.

**FTIR (NaCl, thin film, cm<sup>-1</sup>):** 2955, 2820, 1453, 1248, 1100, 990, 863, 838, 760, 699.

**HRMS (FAB,  $m/z$ ):** calc'd for C<sub>13</sub>H<sub>20</sub>Osi [M-H<sub>2</sub>+H]<sup>+</sup>: 219.1205; found: 219.1191.

**(*E*)-1-(3-cyclopropyl-3-phenylprop-1-en-1-yl)-4-methoxybenzene (11a)**

**1-methoxy-4-((1*E*,5*E*)-6-phenylhexa-1,5-dien-1-yl)benzene (11b)**

**1-methoxy-4-((1*E*,4*E*)-3-methyl-5-phenylpenta-1,4-dien-1-yl)benzene (11c)**

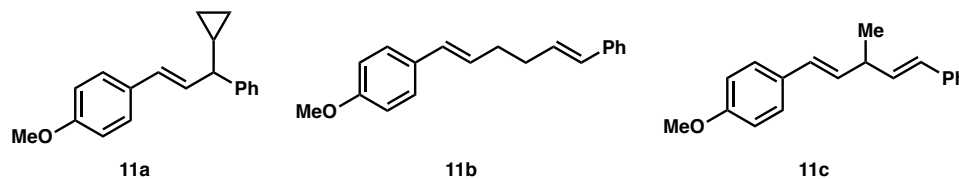

Prepared from (*E*)-1-(2-bromovinyl)-4-methoxybenzene (**1a**, 43 mg, 0.2 mmol) and 1,3-dioxoisindolin-2-yl 2-cyclopropyl-2-phenylacetate (**10**, 64 mg, 0.2 mmol) according to General Procedure 3. The crude residue was purified by column chromatography (silica gel, hexane to 30% toluene/hexane) to yield a mixture of **11a–c** (22 mg, 42% yield) as a colorless oil. The reaction was repeated with 5 mol % and 20 mol % of **4b**, yielding a mixture of **11a–c** in 44% and 49% yield, respectively. Three products are confirmed by GC-MS (extract ion  $m/z = 264$ ). Distinct  $^1\text{H}/^{13}\text{C}$  signals and coupling correlations are confirmed by  $^1\text{H}$ ,  $^{13}\text{C}$ , COSY, HSQC, and HMBC NMR spectroscopy.

NMR data for **11a–c** with 20 mol % **4b**:

**$^1\text{H}$  NMR (400 MHz,  $\text{CDCl}_3$ ):**  $\delta$  7.42 – 7.18 (m, 7H), 6.86 (dq,  $J = 8.9, 2.5$  Hz, 2H), 6.49 – 6.36 (m, 1.8H), 6.34 – 6.08 (m, 1.82H), 3.81 (s, 3H), 3.20 (qt,  $J = 6.9, 1.3$  Hz, 0.1H, *11c*), 2.76 (ddd,  $J = 8.6, 6.9, 1.2$  Hz, 0.2H, *11a*), 2.49 – 2.31 (m, 2.8H, *11b*), 1.31 (d,  $J = 6.9$  Hz, 0.3H, *11c*), 1.23 – 1.13 (m, 0.2H, *11a*), 0.68 (dddd,  $J = 9.1, 8.0, 5.3, 4.1$  Hz, 0.2H, *11a*), 0.56 (dddd,  $J = 9.4, 8.0, 5.2, 4.1$  Hz, 0.2H, *11a*), 0.40 – 0.31 (m, 0.2H, *11a*), 0.28 (dtd,  $J = 9.3, 5.2, 4.2$  Hz, 0.2H, *11a*).

**$^{13}\text{C}$  NMR (101 MHz,  $\text{CDCl}_3$ ):**  $\delta$  158.9, 158.8, 144.6, 137.9, 137.8, 134.7, 132.2, 131.2, 130.7, 130.5, 130.4, 130.3, 129.8, 129.0, 128.7, 128.6, 128.5, 128.3, 128.0, 127.9, 127.4, 127.3, 127.2, 127.1, 127.0, 126.4, 126.2, 126.1, 114.03, 114.02, 55.4, 53.2, 40.2, 33.2, 33.0, 20.5, 16.4, 4.9, 4.4.

**FTIR (NaCl, thin film,  $\text{cm}^{-1}$ ):** 3026, 2931, 2837, 1607, 1511, 1252, 1176, 1034, 966, 800, 692.

**LRMS (GC-MS,  $m/z$ ):** calc'd for  $\text{C}_{19}\text{H}_{20}\text{O}$   $[\text{M}]^+$ : 264.2; found: 3 products, 264.1, 264.1, 264.2.

Ratios of **11a–c** were determined by  $^1\text{H}$  NMR analysis:

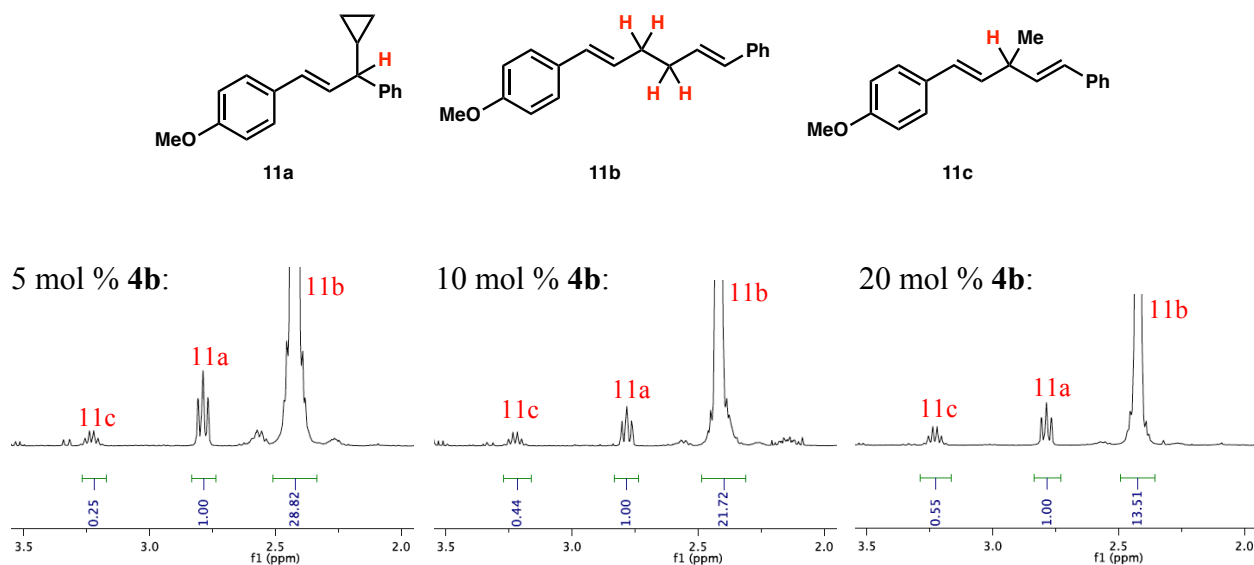

Integration of **11b** was divided by 4 to account for the contribution of 4 protons in the multiplet.

#### NMR Integrations

| Nickel Catalyst | Cyclopropane (11a) | Linear (11b) | Branched (11c) | Ring Closed Total | Ring Open Total |
|-----------------|--------------------|--------------|----------------|-------------------|-----------------|
| 5%              | 1.00               | 7.21         | 0.25           | 1.00              | 7.46            |
| 10%             | 1.00               | 5.43         | 0.44           | 1.00              | 5.87            |
| 20%             | 1.00               | 3.38         | 0.55           | 1.00              | 3.93            |

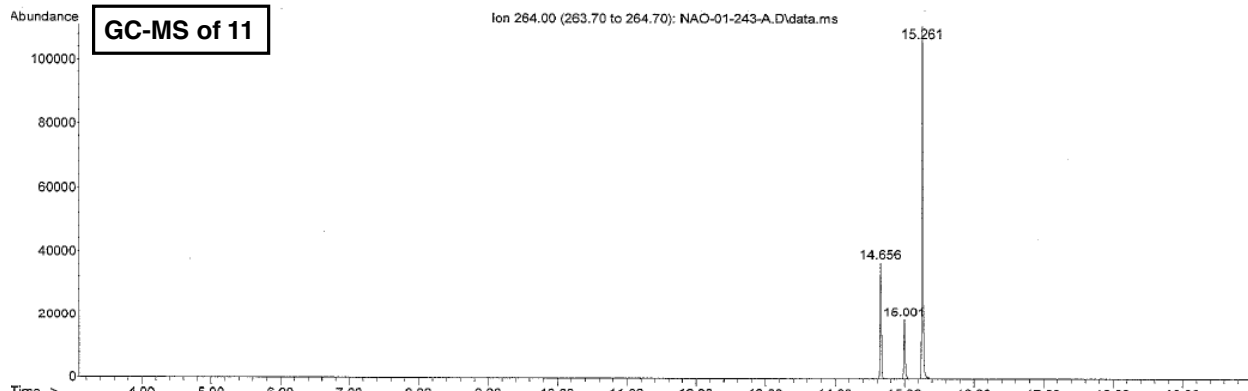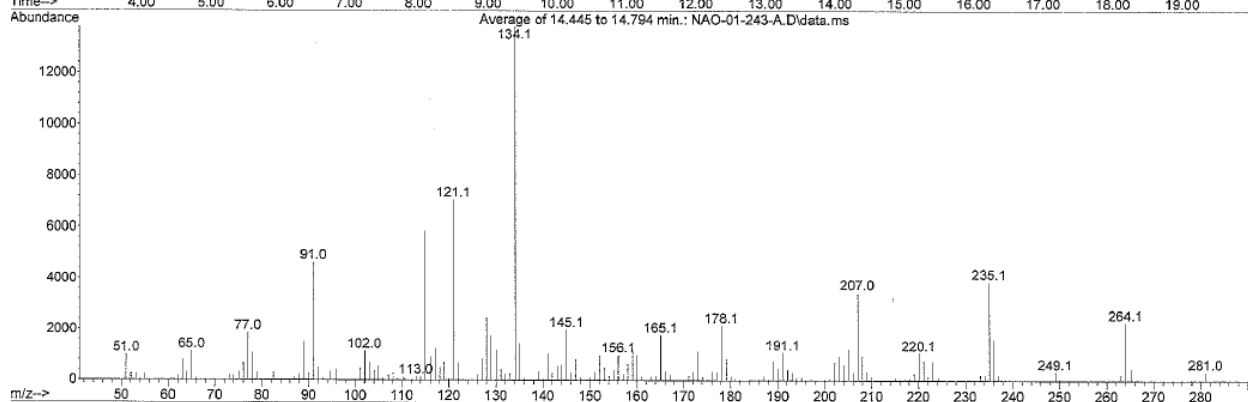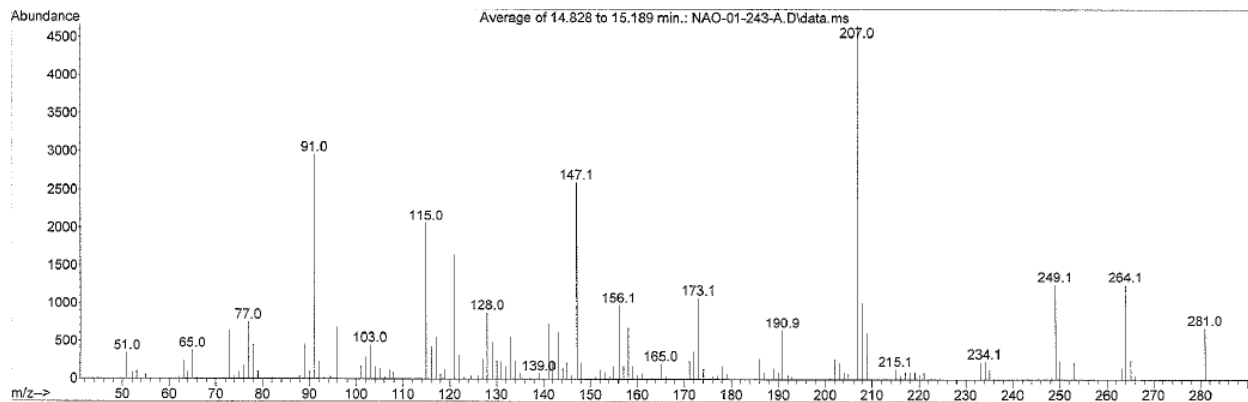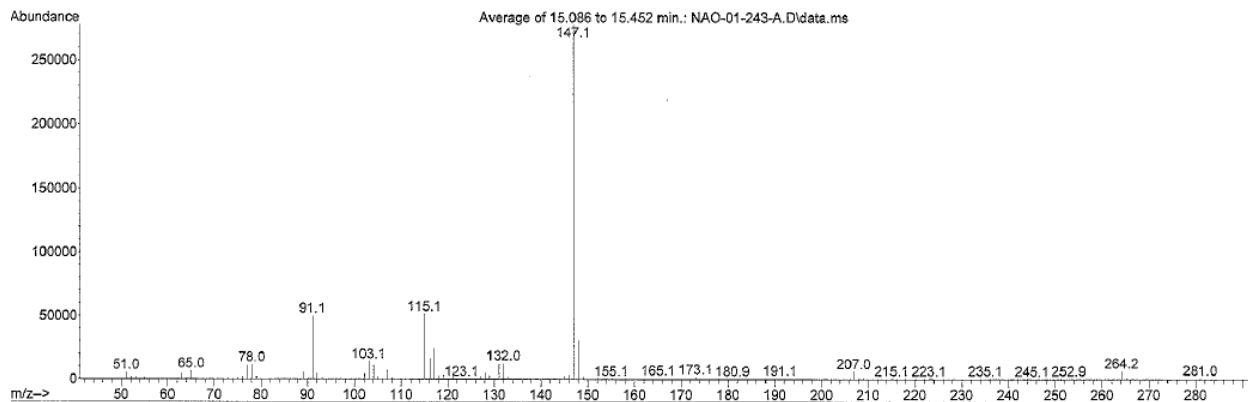

### e. Comparison of Benzyl Cl and NHP Ester %ee Values

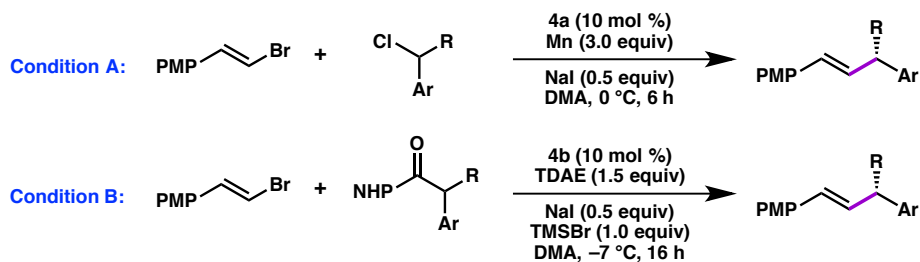

Table S3. Product %ee Values using Conditions for Benzyl Chlorides or NHP Esters

| Product | Ar                  | R                      | Conditions:        |                    |                    |
|---------|---------------------|------------------------|--------------------|--------------------|--------------------|
|         |                     |                        | A                  | A                  | B                  |
|         |                     |                        | ee(%) <sup>a</sup> | ee(%) <sup>b</sup> | ee(%) <sup>c</sup> |
| 3a      | --                  | Me                     | 93                 | 96                 | 96                 |
| 7a      | 4-OMe               | Me                     | 93                 | 93                 | 93                 |
| 7b      | 4-CF <sub>3</sub>   | Me                     | --                 | 87                 | 88                 |
| 7c      | 4-Br                | Me                     | 90                 | 90                 | 90                 |
| 7d      | 4-F                 | Me                     | 89                 | 90                 | 92                 |
| 7e      | 4-NMe <sub>2</sub>  | Me                     | --                 | --                 | 95                 |
| 7f      | 3,4-Cl <sub>2</sub> | Me                     | --                 | 77 <sup>d</sup>    | 82                 |
| 7g      | --                  | Et                     | 97                 | 97                 | 97                 |
| 7h      | --                  | Bn                     | 93                 | 92                 | 95                 |
| 7i      | --                  | iPr                    | --                 | 97                 | 97                 |
| 7j      | --                  | (CH <sub>2</sub> )OTBS | --                 | --                 | 98                 |
| 7k      | --                  | 2-butene               | --                 | --                 | 96                 |
| 7l      | --                  | 3-chlorobutane         | --                 | --                 | 93                 |

<sup>a</sup>Values reported in Reference 13 with ligand L and NiCl<sub>2</sub>(dme). <sup>b</sup>Values obtained using the conditions reported in Reference 13 and with Ni complex 4a prepared with the same batch of ligand used in this manuscript. <sup>c</sup>Values reported in this manuscript (Table 2 and Table 3). <sup>d</sup>The ee was improved to 79% with 2 equiv vinyl bromide.



## 7. References

- <sup>1</sup> Still, W. C.; Kahn, M.; Mitra, A. *J. Org. Chem.* **1978**, *43*, 2923.
- <sup>2</sup> Snyder, S. A.; ElSohly, A. M.; Kontes, F. *Angew. Chem. Int. Ed.* **2010**, *49*, 9693.
- <sup>3</sup> Sibi, M. P.; Liu, M. *Org. Lett.* **2000**, *2*, 3393.
- <sup>4</sup> Evans, D. A.; Downey, C. W.; Hubbs, J. L. *J. Am. Chem. Soc.* **2003**, *125*, 8706.
- <sup>5</sup> APEX2, Version 2 User Manual, M86-E01078, Bruker Analytical X-ray Systems, Madison, WI, **June 2006**.
- <sup>6</sup> Sheldrick, G.M. “*SADABS (version 2008/1): Program for Absorption Correction for Data from Area Detector Frames*”, University of Göttingen, **2008**.
- <sup>7</sup> Sheldrick, G. *Acta Crystallogr., Sect. A: Found. Crystallogr.* **2008**, *64*, 112.
- <sup>8</sup> Müller, P. *Crystallogr. Rev.* **2009**, *15*, 57.
- <sup>9</sup> Parsons, S; Flack, H. D; Wagner, T. *Acta Cryst.* **2013**, *B69*, 249.
- <sup>10</sup> Bestmann, H. J.; Schmid, G.; Oechsner, H.; Ermann, P. *Chem. Ber.* **1984**, *117*, 1561.
- <sup>11</sup> Wasserman, H. H.; Ives, J. L. *J. Org. Chem.* **1985**, *50*, 3573.
- <sup>12</sup> Mahesh, M.; Murphy, J. A.; LeStrat, F.; Wessel, H. P. *Beilstein J. Org. Chem.* **2009**, *5*, 1.
- <sup>13</sup> Cherney, A. H.; Reisman, S. E. *J. Am. Chem. Soc.* **2014**, *136*, 14365.
- <sup>14</sup> Müller, D.; Alexakis, A. *Org. Lett.* **2012**, *14*, 1842.
- <sup>15</sup> Qian, M.; Huang, Z.; Negishi, E.-I. *Org. Lett.* **2004**, *6*, 1531.
- <sup>16</sup> Kuang, C.; Senboku, H.; Tokuda, M. *Tetrahedron* **2005**, *61*, 637.
- <sup>17</sup> Li, D.-R.; Zhang, D.-H.; Sun, C.-Y.; Zhang, J.-W.; Yang, L.; Chen, J.; Liu, B.; Su, C.; Zhou, W.-S.; Lin, G.-Q. *Chem. Eur. J.* **2006**, *12*, 1185.
- <sup>18</sup> Brown, H. C.; Larock, R. C.; Gupta, S. K.; Rajagopalan, S.; Bhat, N. G. *J. Org. Chem.* **1989**, *54*, 6079.
- <sup>19</sup> Ney, J. E.; Hay, M. B.; Yang, Q.; Wolfe, J. P. *Adv. Synth. Catal.* **2005**, *347*, 1614.
- <sup>20</sup> Iranpoor, N.; Firouzabadi, H.; Aghapour, Gh.; Vaez zadeh A. R. *Tetrahedron* **2002**, *58*, 8689.
- <sup>21</sup> Wu, H.-B.; Ma, X.-T.; Tian, S.-K. *Chem. Commun.* **2014**, *50*, 219.
- <sup>22</sup> Ye, J.; Zhao, J.; Xu, J.; Mao, Y.; Zhang, Y. *J. Chem. Commun.* **2013**, *49*, 9761.
- <sup>23</sup> Srinivas, H. D.; Zhou, Q.; Watson, M. P. *Org. Lett.* **2014**, *16*, 3596.

## 8. Chiral SFC Traces (Note: Racemic samples made with scalemic ligand.)

3a (Figure 1): racemic

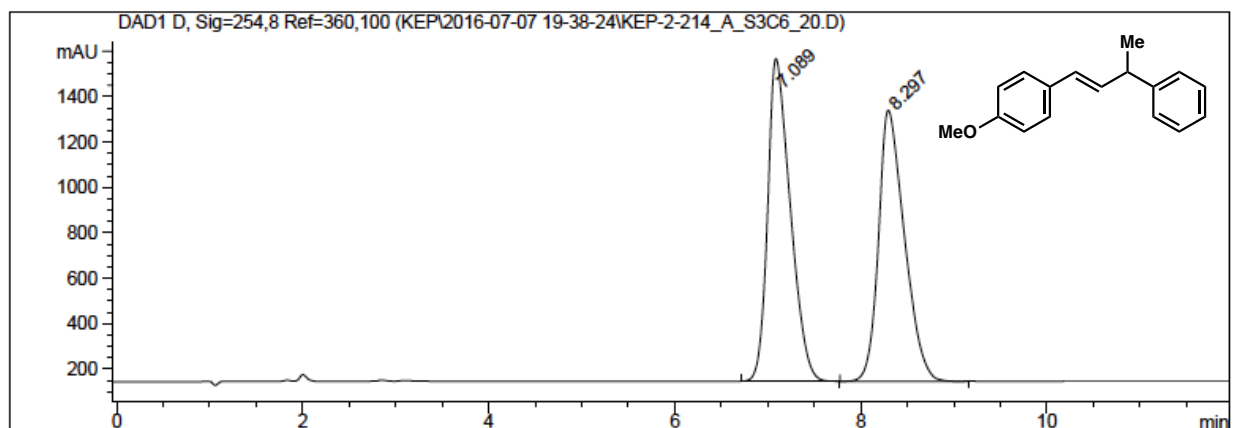

| Peak # | RetTime [min] | Type | Width [min] | Area [mAU*s] | Height [mAU] | Area %  |
|--------|---------------|------|-------------|--------------|--------------|---------|
| 1      | 7.089         | BV   | 0.2581      | 2.40965e4    | 1419.46216   | 50.9929 |
| 2      | 8.297         | VB   | 0.2903      | 2.31582e4    | 1193.77161   | 49.0071 |

3a (Figure 1): enantioenriched, 96% ee

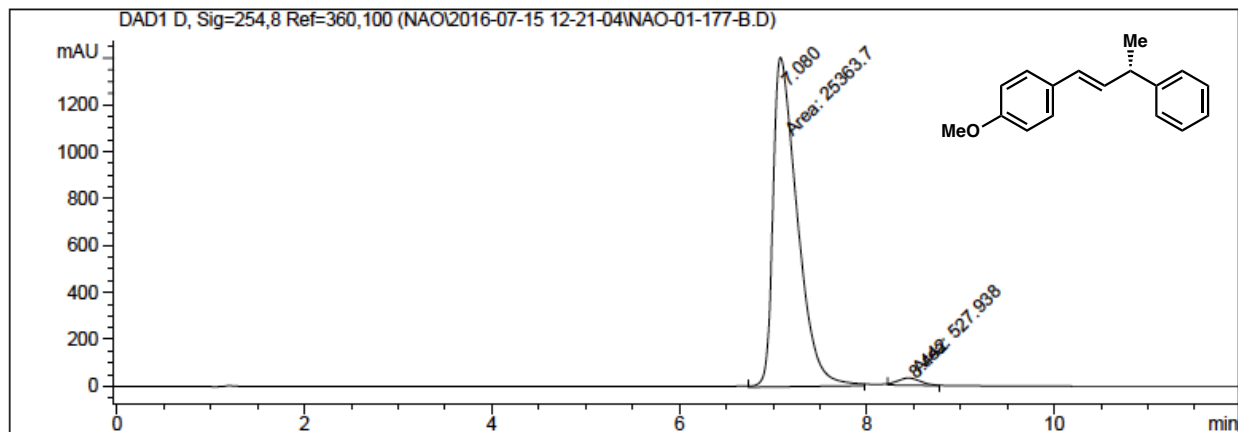

| Peak # | RetTime [min] | Type | Width [min] | Area [mAU*s] | Height [mAU] | Area %  |
|--------|---------------|------|-------------|--------------|--------------|---------|
| 1      | 7.080         | MM   | 0.3005      | 2.53637e4    | 1406.71533   | 97.9610 |
| 2      | 8.442         | MM   | 0.2816      | 527.93842    | 31.25150     | 2.0390  |

### 3b (Figure 1): racemic

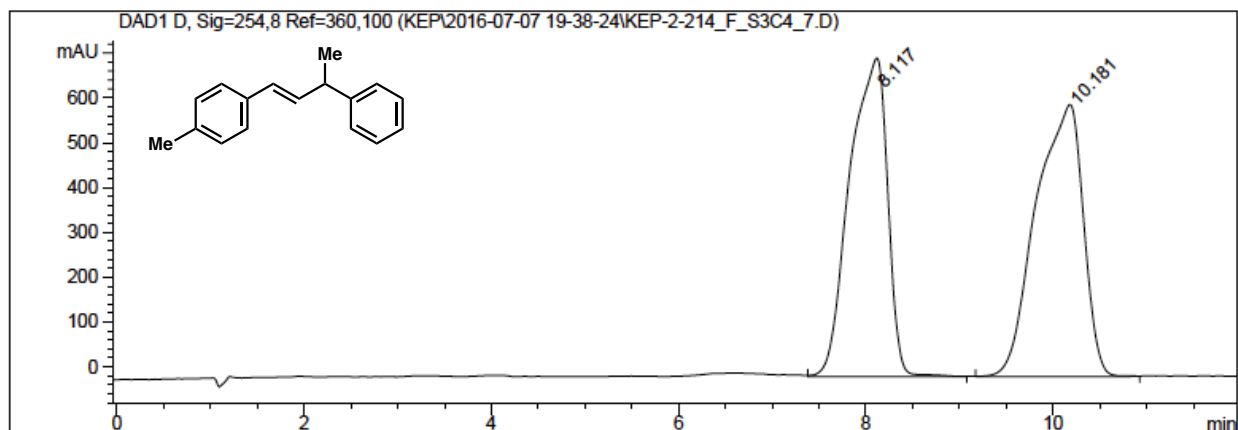

### 3b (Figure 1): enantioenriched, 95% ee

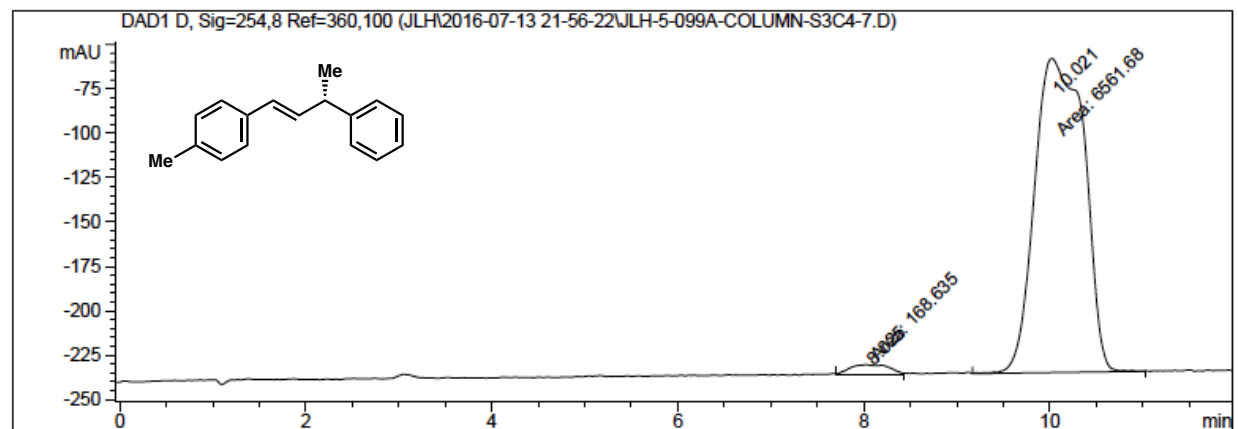

### 3c (Figure 1): racemic

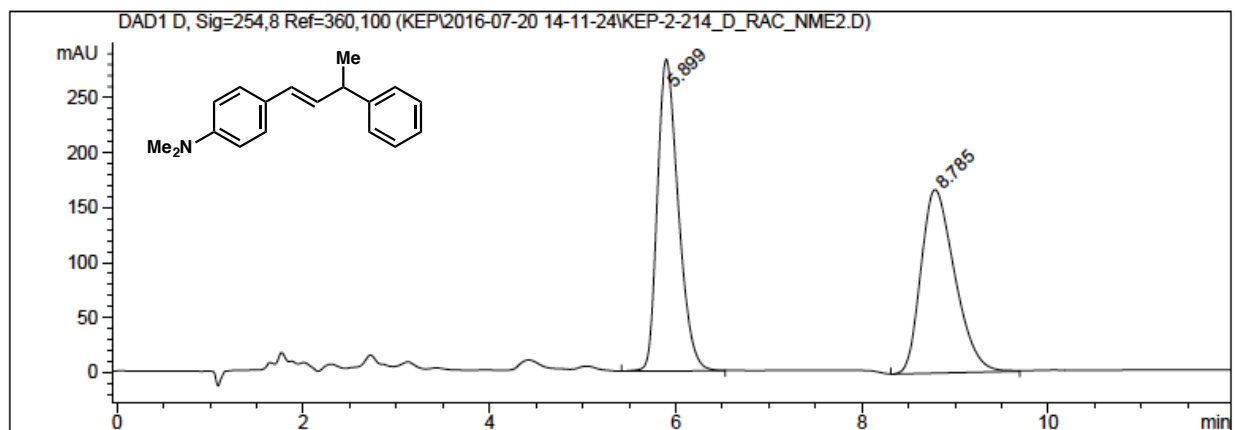

| Peak # | RetTime [min] | Type | Width [min] | Area [mAU*s] | Height [mAU] | Area %  |
|--------|---------------|------|-------------|--------------|--------------|---------|
| 1      | 5.899         | VB   | 0.2423      | 4429.97607   | 283.53226    | 51.2284 |
| 2      | 8.785         | BB   | 0.3949      | 4217.52539   | 166.83267    | 48.7716 |

### 3c (Figure 1): enantioenriched, 97% ee

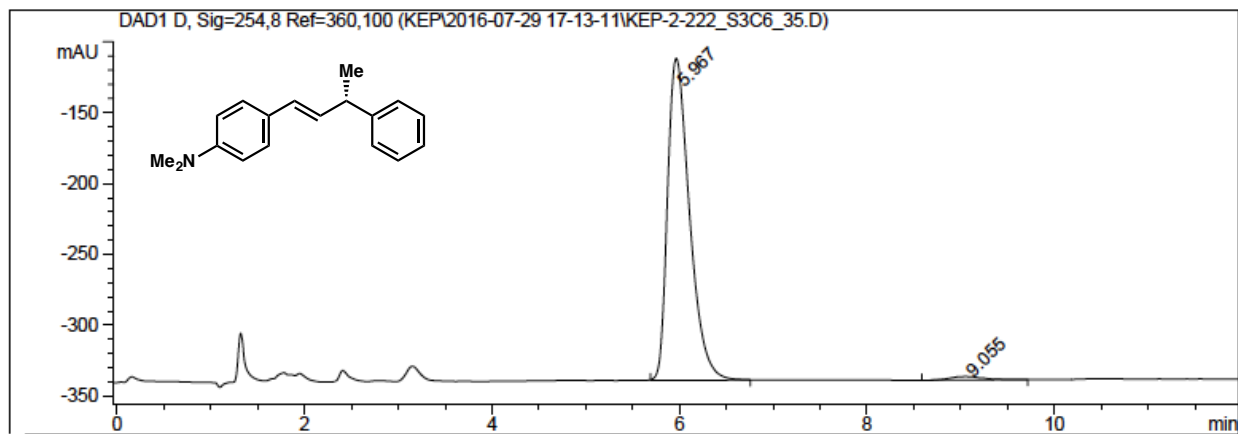

| Peak # | RetTime [min] | Type | Width [min] | Area [mAU*s] | Height [mAU] | Area %  |
|--------|---------------|------|-------------|--------------|--------------|---------|
| 1      | 5.967         | BB   | 0.2505      | 3707.96924   | 227.13380    | 98.4506 |
| 2      | 9.055         | BB   | 0.2926      | 58.35402     | 2.46108      | 1.5494  |

**3d (Figure 1): racemic**

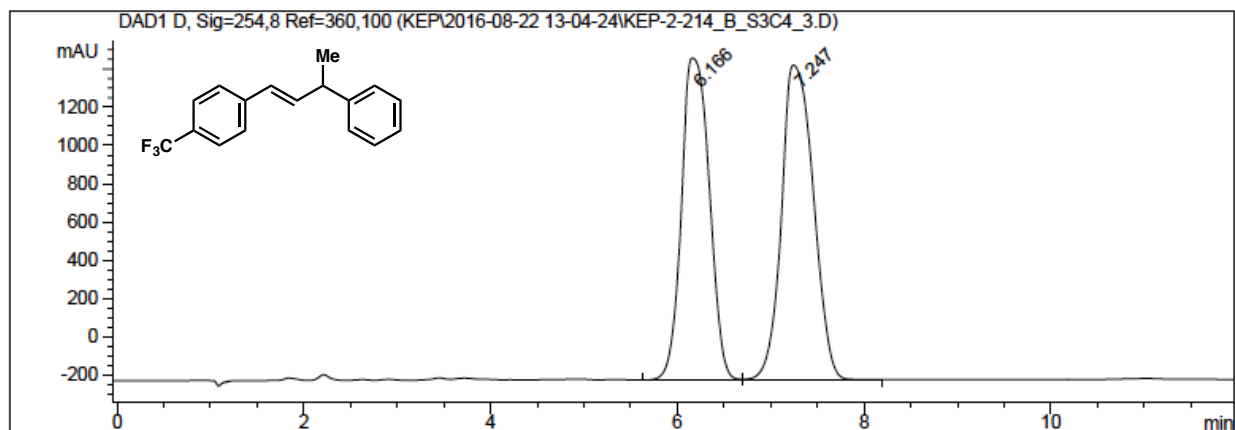

| Peak # | RetTime [min] | Type | Width [min] | Area [mAU*s] | Height [mAU] | Area %  |
|--------|---------------|------|-------------|--------------|--------------|---------|
| 1      | 6.166         | VV   | 0.3308      | 3.50747e4    | 1685.07422   | 47.1051 |
| 2      | 7.247         | VB   | 0.3749      | 3.93858e4    | 1647.52795   | 52.8949 |

**3d (Figure 1): enantioenriched, 93% ee**

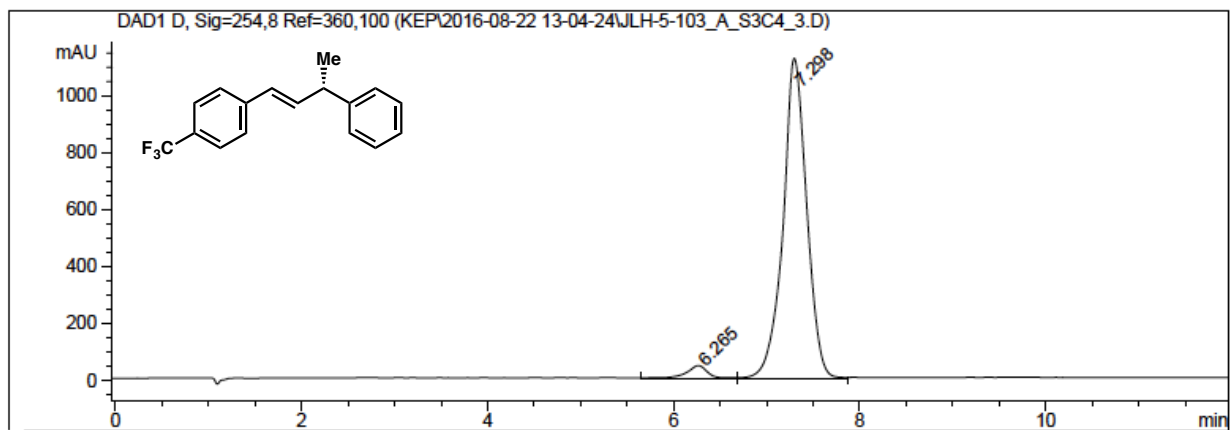

| Peak # | RetTime [min] | Type | Width [min] | Area [mAU*s] | Height [mAU] | Area %  |
|--------|---------------|------|-------------|--------------|--------------|---------|
| 1      | 6.265         | VV   | 0.2265      | 687.93018    | 43.98362     | 3.3472  |
| 2      | 7.298         | VV   | 0.2624      | 1.98645e4    | 1122.81396   | 96.6528 |

**3e (Figure 1): racemic**

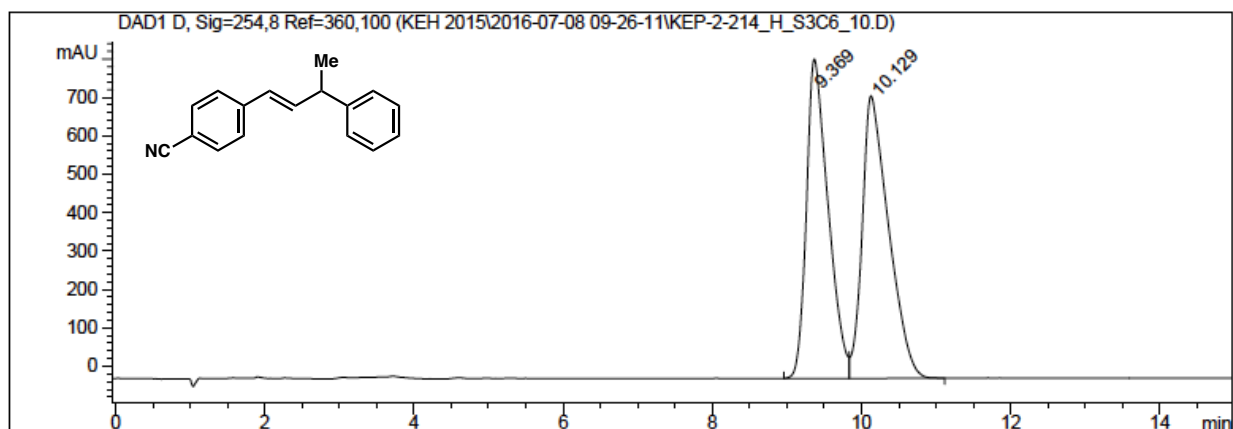

| Peak # | RetTime [min] | Type | Width [min] | Area [mAU*s] | Height [mAU] | Area %  |
|--------|---------------|------|-------------|--------------|--------------|---------|
| 1      | 9.369         | BV   | 0.2960      | 1.68057e4    | 830.62769    | 48.1897 |
| 2      | 10.129        | VB   | 0.3508      | 1.80684e4    | 734.99915    | 51.8103 |

**3e (Figure 1): enantioenriched, 94% ee**

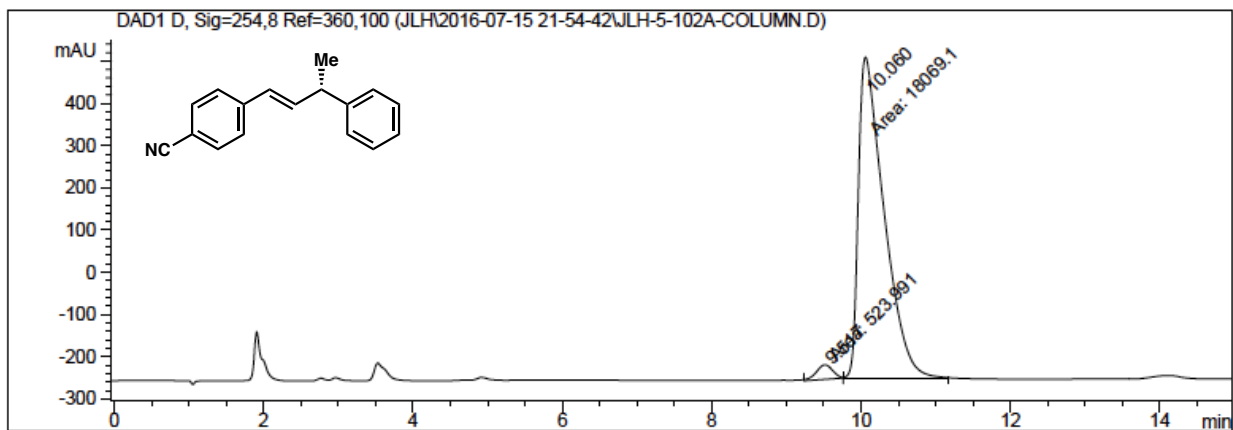

| Peak # | RetTime [min] | Type | Width [min] | Area [mAU*s] | Height [mAU] | Area %  |
|--------|---------------|------|-------------|--------------|--------------|---------|
| 1      | 9.517         | MM   | 0.2532      | 523.99091    | 34.49692     | 2.8182  |
| 2      | 10.060        | MM   | 0.3962      | 1.80691e4    | 760.05249    | 97.1818 |

**3f (Figure 1): racemic**

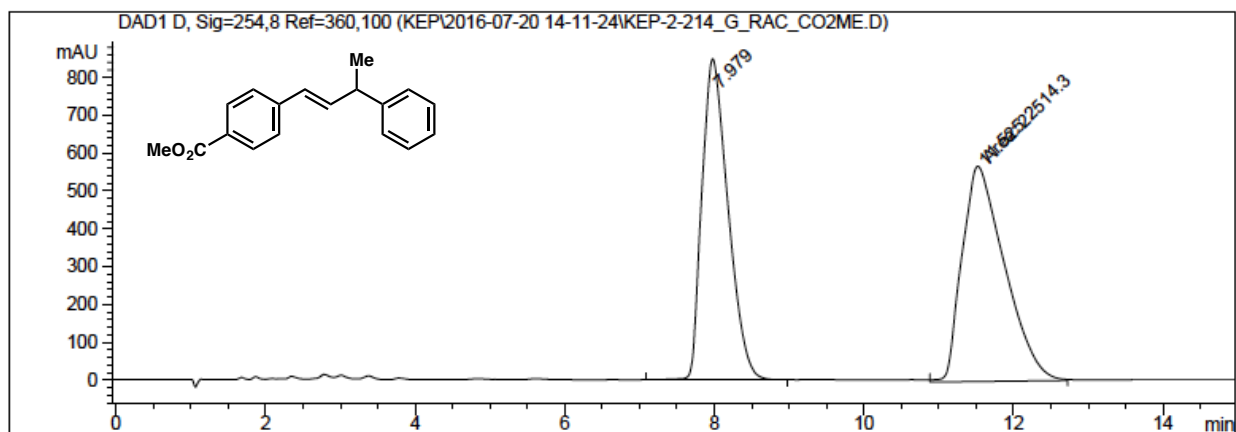

| Peak # | RetTime [min] | Type | Width [min] | Area [mAU*s] | Height [mAU] | Area %  |
|--------|---------------|------|-------------|--------------|--------------|---------|
| 1      | 7.979         | BB   | 0.3869      | 2.05724e4    | 848.34802    | 47.7466 |
| 2      | 11.525        | MM   | 0.6592      | 2.25143e4    | 569.27423    | 52.2534 |

**3f (Figure 1): enantioenriched, 95% ee**

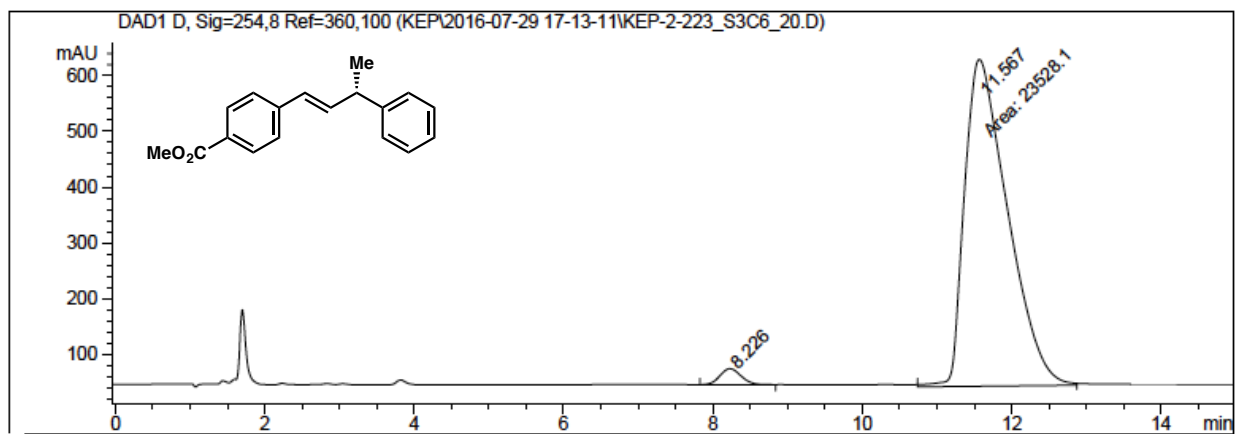

| Peak # | RetTime [min] | Type | Width [min] | Area [mAU*s] | Height [mAU] | Area %  |
|--------|---------------|------|-------------|--------------|--------------|---------|
| 1      | 8.226         | BB   | 0.3069      | 568.03058    | 28.69778     | 2.3574  |
| 2      | 11.567        | MM   | 0.6679      | 2.35281e4    | 587.09686    | 97.6426 |

**3g (Figure 1): racemic**

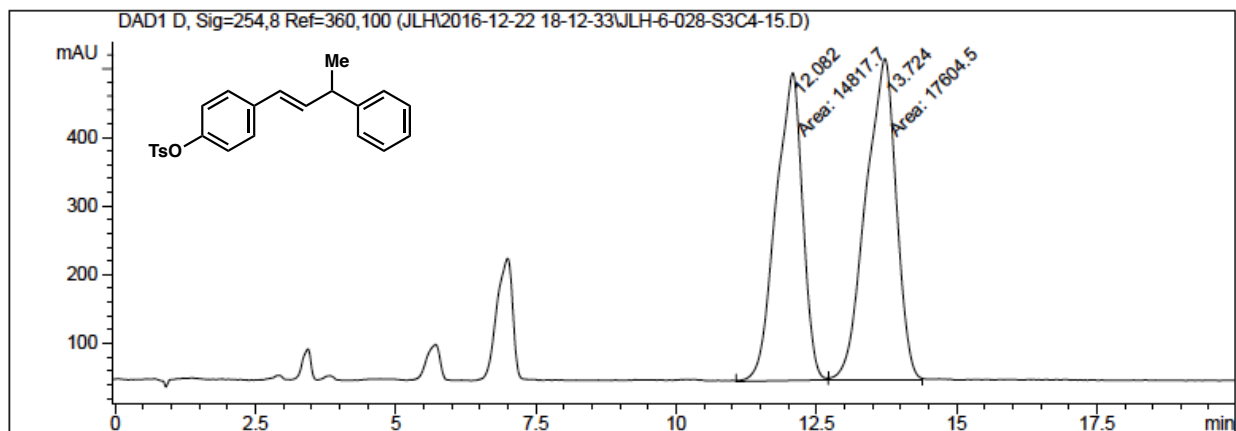

| Peak # | RetTime [min] | Type | Width [min] | Area [mAU*s] | Height [mAU] | Area %  |
|--------|---------------|------|-------------|--------------|--------------|---------|
| 1      | 12.082        | MM   | 0.5513      | 1.48177e4    | 447.97232    | 45.7023 |
| 2      | 13.724        | MM   | 0.6275      | 1.76045e4    | 467.56030    | 54.2977 |

**3g (Figure 1): enantioenriched, 94% ee**

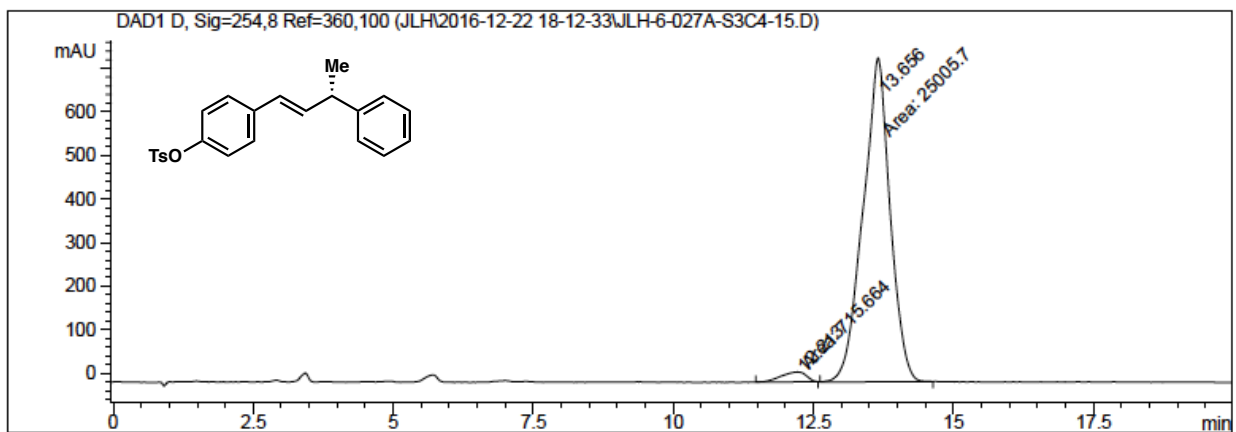

| Peak # | RetTime [min] | Type | Width [min] | Area [mAU*s] | Height [mAU] | Area %  |
|--------|---------------|------|-------------|--------------|--------------|---------|
| 1      | 12.213        | MM   | 0.5201      | 715.66412    | 22.93249     | 2.7824  |
| 2      | 13.656        | MM   | 0.5598      | 2.50057e4    | 744.50916    | 97.2176 |



### 3h (Figure 1): racemic

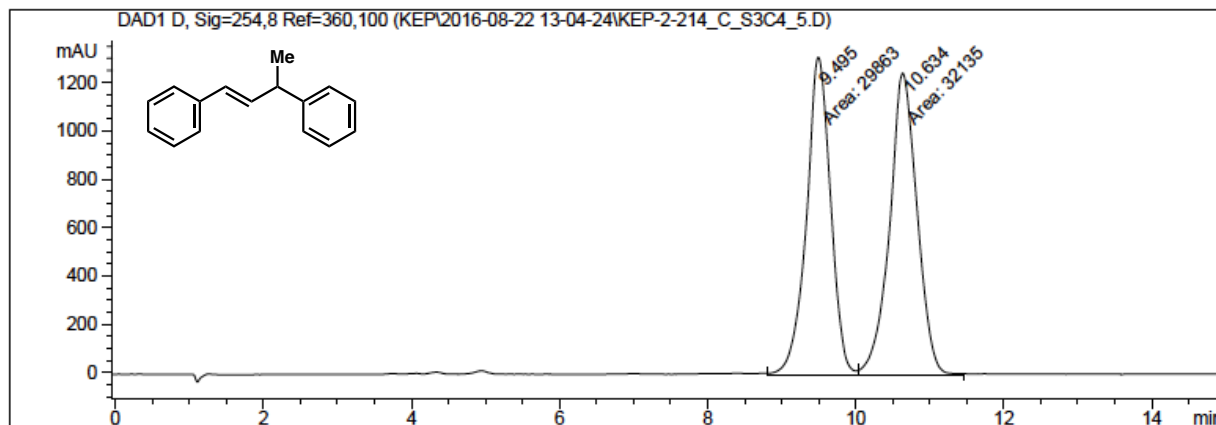

| Peak # | RetTime [min] | Type | Width [min] | Area [mAU*s] | Height [mAU] | Area %  |
|--------|---------------|------|-------------|--------------|--------------|---------|
| 1      | 9.495         | MM   | 0.3786      | 2.98630e4    | 1314.49744   | 48.1677 |
| 2      | 10.634        | MM   | 0.4290      | 3.21350e4    | 1248.56421   | 51.8323 |

### 3h (Figure 1): enantioenriched, 96% ee

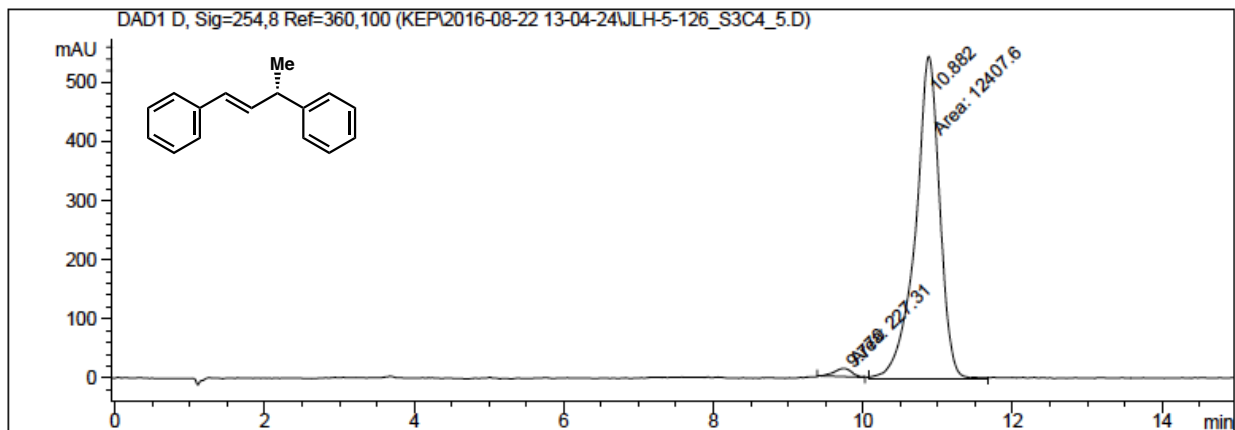

| Peak # | RetTime [min] | Type | Width [min] | Area [mAU*s] | Height [mAU] | Area %  |
|--------|---------------|------|-------------|--------------|--------------|---------|
| 1      | 9.770         | MM   | 0.2725      | 227.31046    | 13.90100     | 1.7991  |
| 2      | 10.882        | MM   | 0.3782      | 1.24076e4    | 546.85577    | 98.2009 |

**3i (Figure 1): racemic**

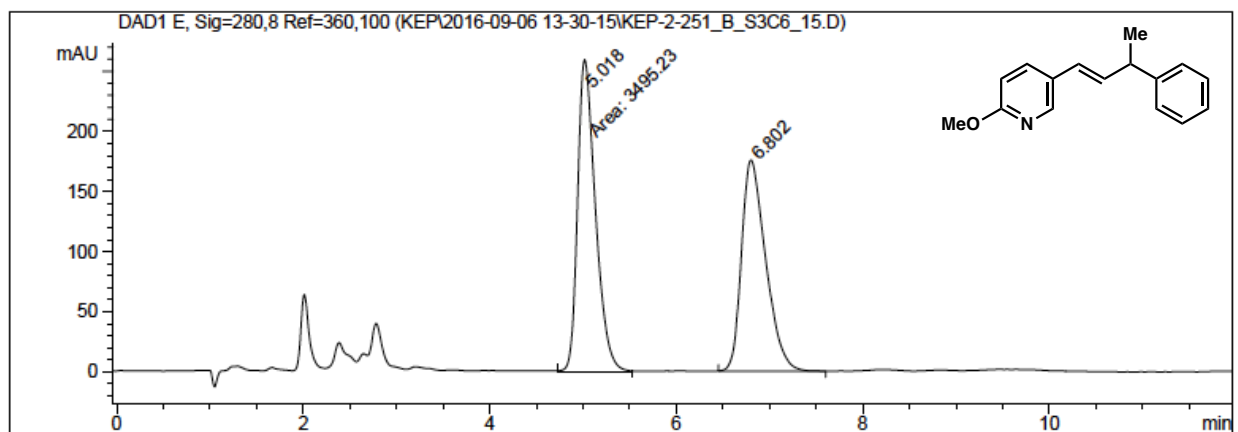

**3i (Figure 1): enantioenriched, 95% ee**

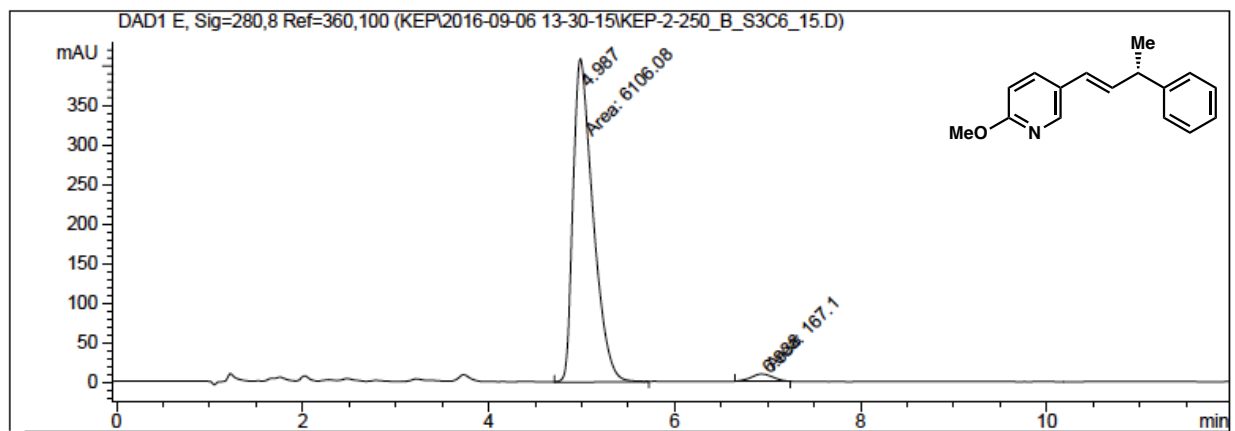

### 3j (Figure 1): racemic

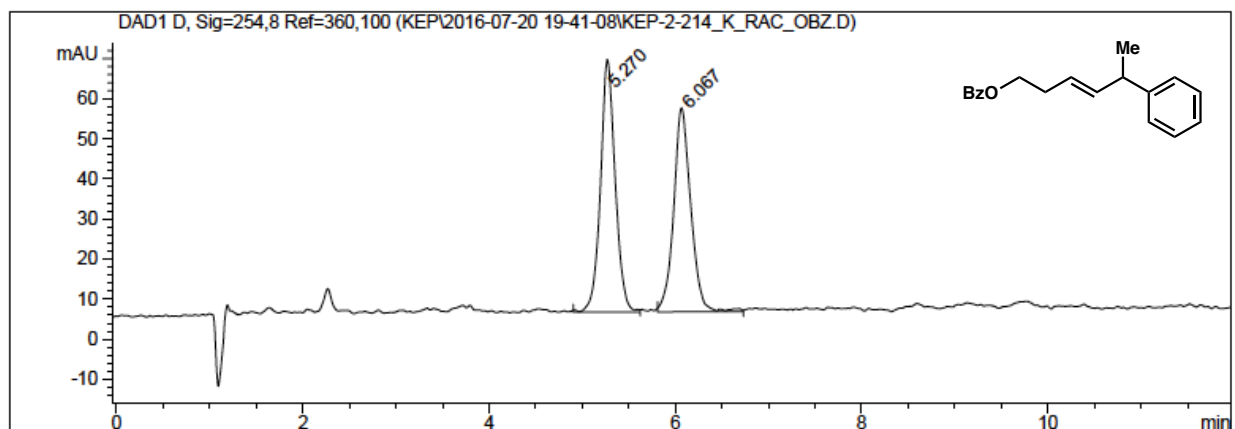

### 3j (Figure 1): enantioenriched, 97% ee

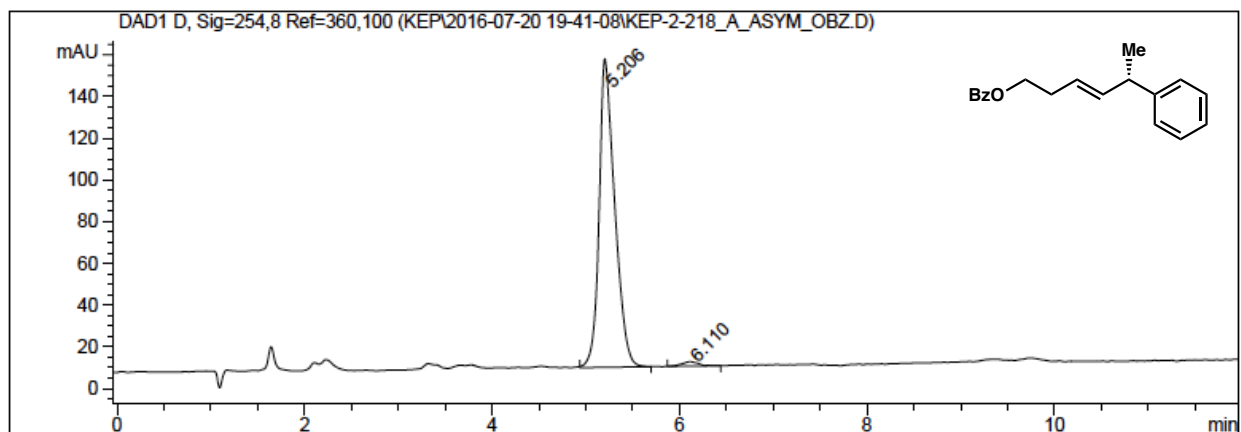

**3k (Figure 1): racemic**

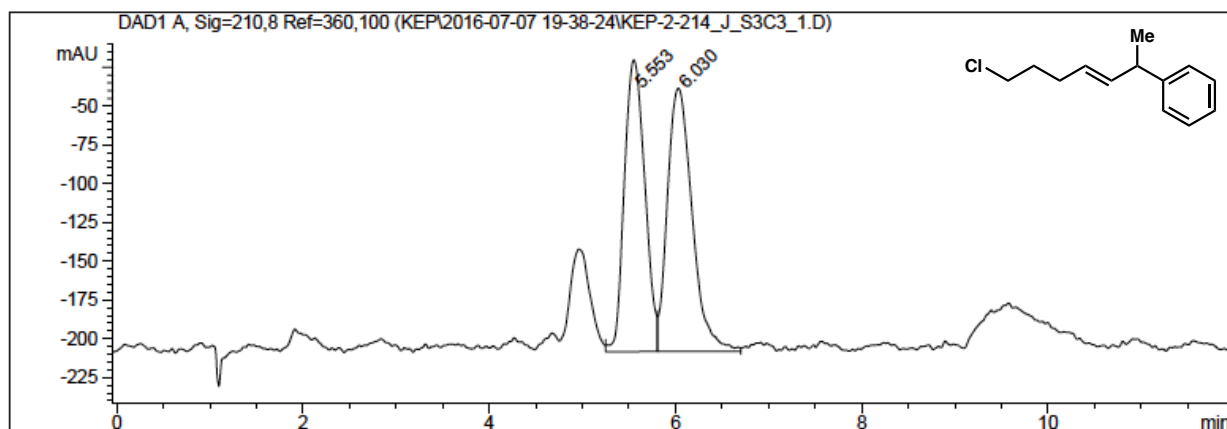

| Peak # | RetTime [min] | Type | Width [min] | Area [mAU*s] | Height [mAU] | Area %  |
|--------|---------------|------|-------------|--------------|--------------|---------|
| 1      | 5.553         | VV   | 0.2466      | 2879.10791   | 188.09062    | 47.7991 |
| 2      | 6.030         | VV   | 0.2922      | 3144.24927   | 169.66949    | 52.2009 |

**3k (Figure 1): enantioenriched, 91% ee**

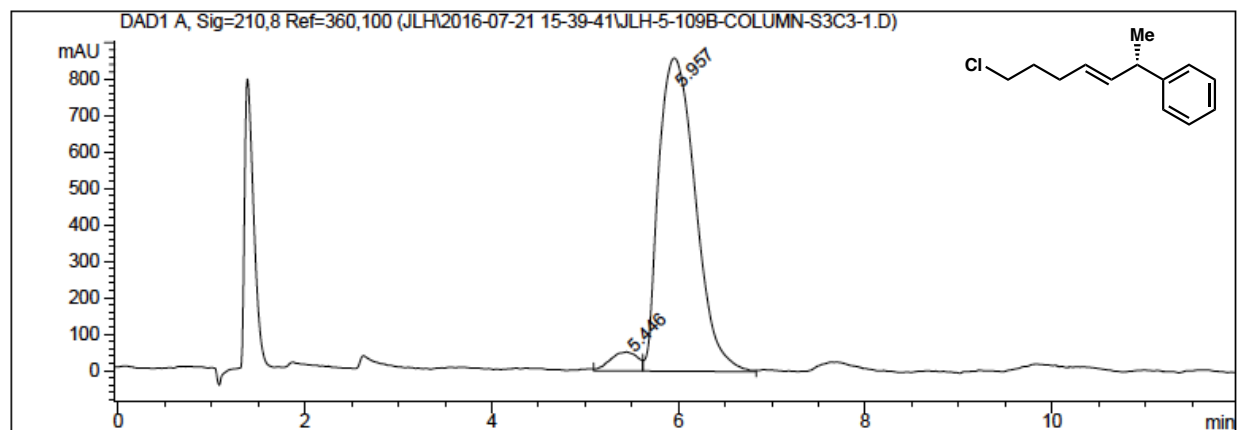

| Peak # | RetTime [min] | Type | Width [min] | Area [mAU*s] | Height [mAU] | Area %  |
|--------|---------------|------|-------------|--------------|--------------|---------|
| 1      | 5.446         | VV   | 0.2528      | 1053.08008   | 51.88251     | 4.2859  |
| 2      | 5.957         | VV   | 0.4514      | 2.35179e4    | 858.91888    | 95.7141 |

**3l (Figure 1): racemic**

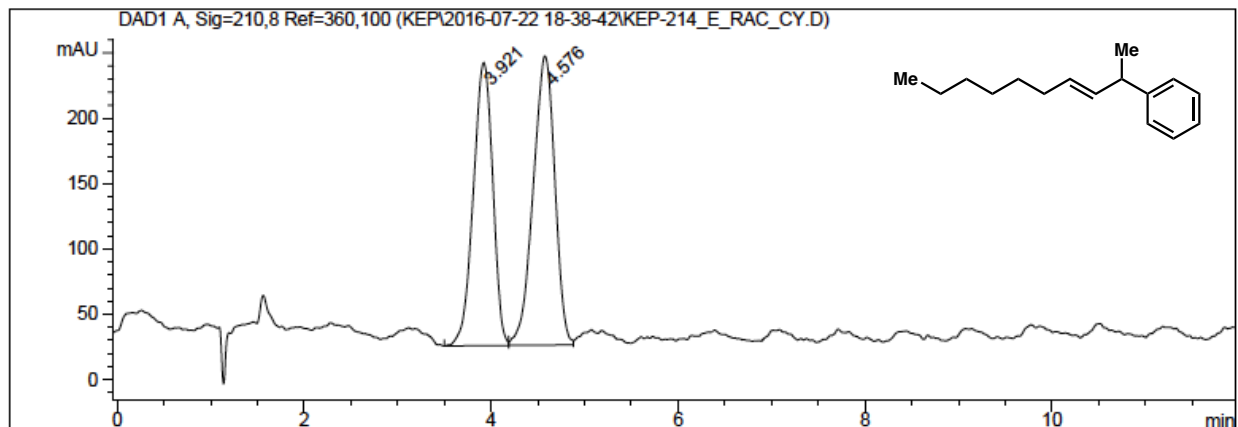

| Peak # | RetTime [min] | Type | Width [min] | Area [mAU*s] | Height [mAU] | Area %  |
|--------|---------------|------|-------------|--------------|--------------|---------|
| 1      | 3.921         | VV   | 0.2294      | 3145.27051   | 216.62386    | 46.8268 |
| 2      | 4.576         | VV   | 0.2603      | 3571.54810   | 221.25337    | 53.1732 |

**3l (Figure 1): enantioenriched, 94% ee**

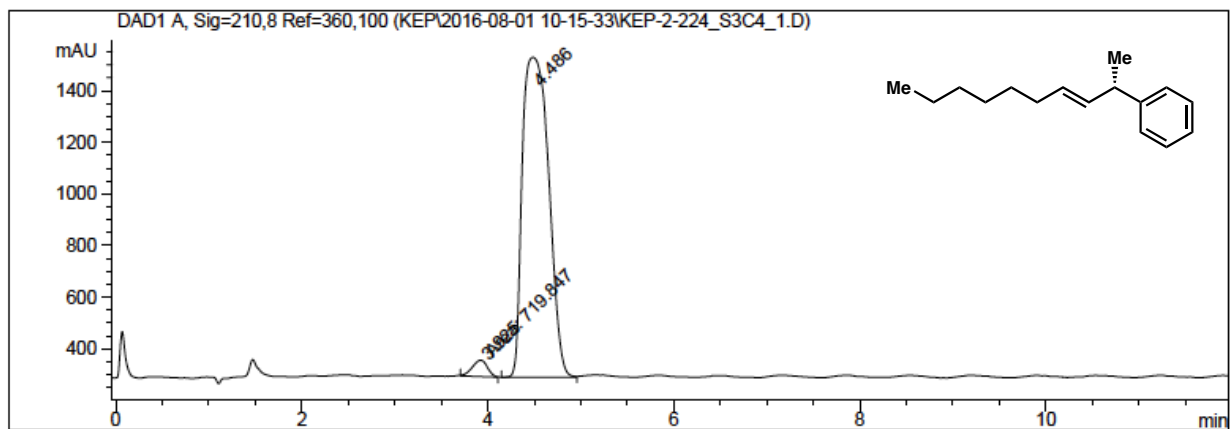

| Peak # | RetTime [min] | Type | Width [min] | Area [mAU*s] | Height [mAU] | Area %  |
|--------|---------------|------|-------------|--------------|--------------|---------|
| 1      | 3.925         | MM   | 0.1890      | 719.84717    | 63.47777     | 2.8630  |
| 2      | 4.486         | VV   | 0.3261      | 2.44231e4    | 1238.09705   | 97.1370 |

S7 (de-silylated 3m, Figure 1): racemic

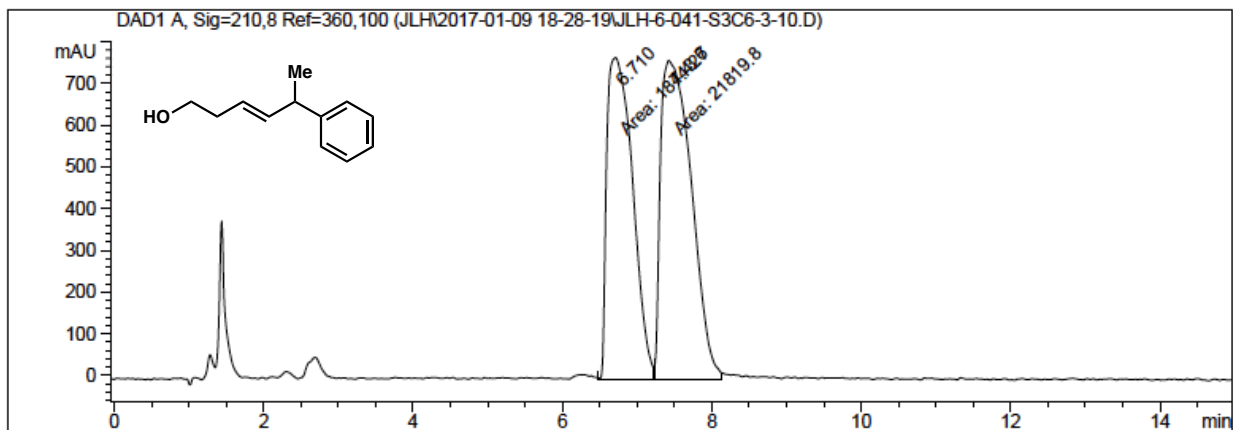

| Peak # | RetTime [min] | Type | Width [min] | Area [mAU*s] | Height [mAU] | Area %  |
|--------|---------------|------|-------------|--------------|--------------|---------|
| 1      | 6.710         | MM   | 0.3992      | 1.84436e4    | 770.06226    | 45.8074 |
| 2      | 7.427         | MM   | 0.4761      | 2.18198e4    | 763.80591    | 54.1926 |

S7 (de-silylated 3m, Figure 1): enantioenriched, 89% ee

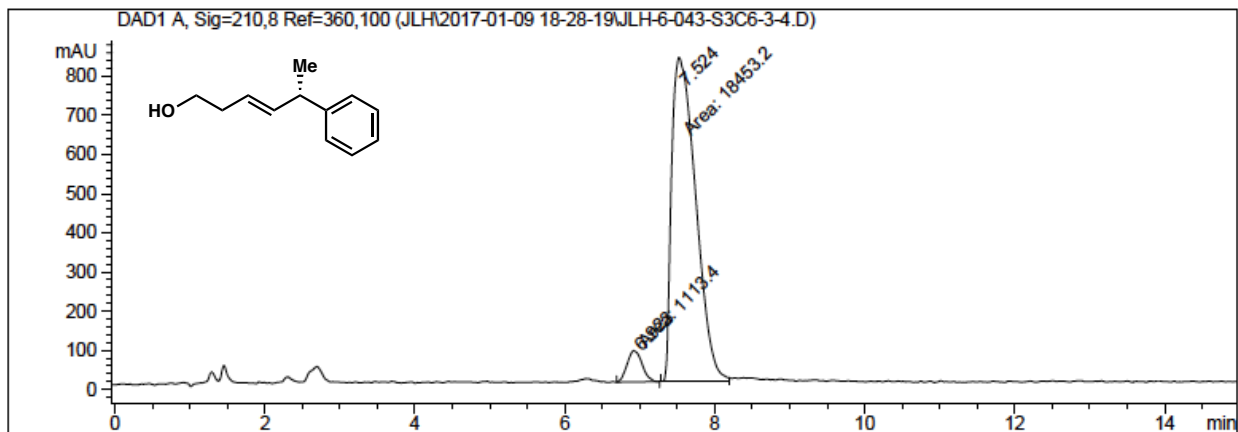

| Peak # | RetTime [min] | Type | Width [min] | Area [mAU*s] | Height [mAU] | Area %  |
|--------|---------------|------|-------------|--------------|--------------|---------|
| 1      | 6.923         | MM   | 0.2309      | 1113.40063   | 80.37251     | 5.6903  |
| 2      | 7.524         | MM   | 0.3711      | 1.84532e4    | 828.86755    | 94.3097 |

**3n (Figure 1): racemic**

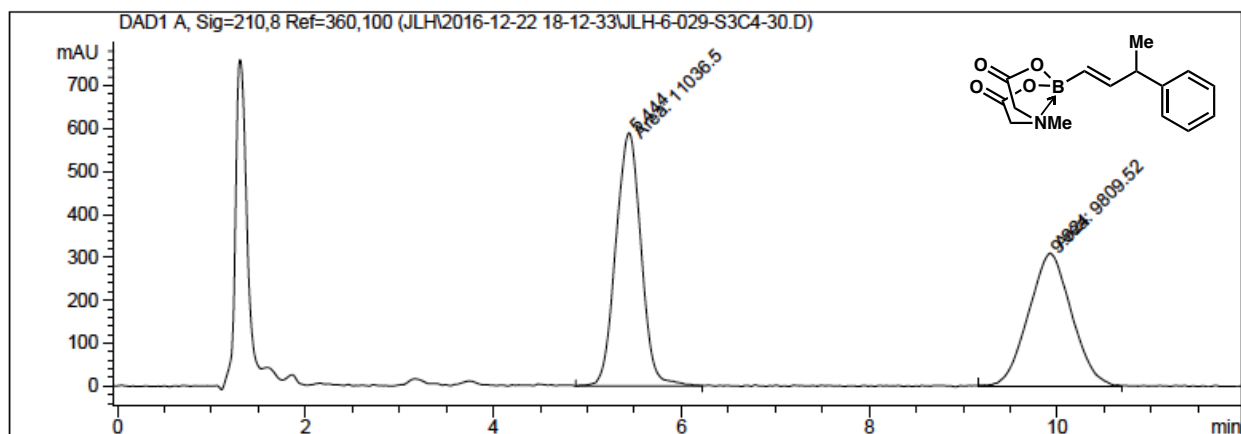

| Peak # | RetTime [min] | Type | Width [min] | Area [mAU*s] | Height [mAU] | Area %  |
|--------|---------------|------|-------------|--------------|--------------|---------|
| 1      | 5.444         | MM   | 0.3119      | 1.10365e4    | 589.78003    | 52.9429 |
| 2      | 9.924         | MM   | 0.5290      | 9809.52246   | 309.03564    | 47.0571 |

**3n (Figure 1): enantioenriched, 97% ee**

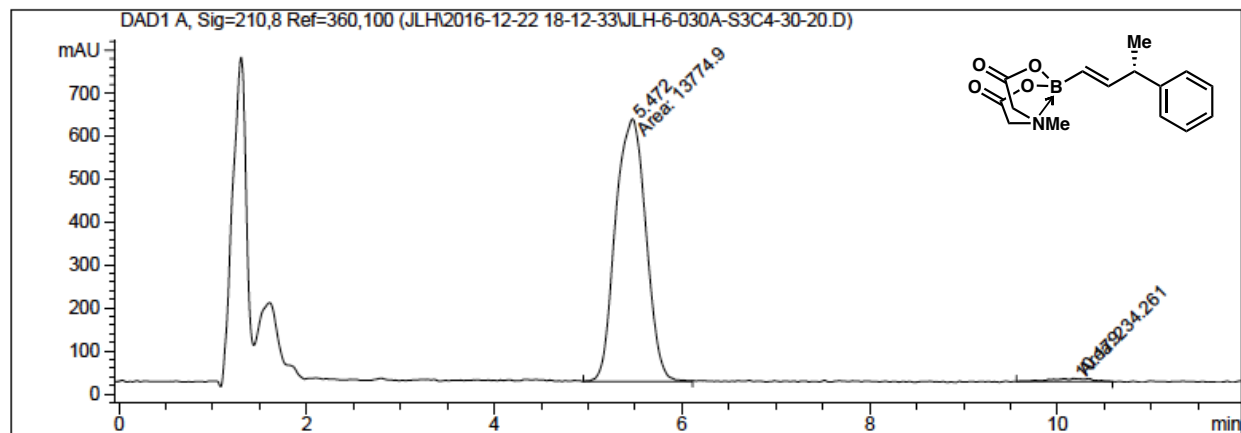

| Peak # | RetTime [min] | Type | Width [min] | Area [mAU*s] | Height [mAU] | Area %  |
|--------|---------------|------|-------------|--------------|--------------|---------|
| 1      | 5.472         | MM   | 0.3758      | 1.37749e4    | 610.96771    | 98.3278 |
| 2      | 10.179        | MM   | 0.5146      | 234.26103    | 7.58734      | 1.6722  |

**3o (Figure 1): racemic**

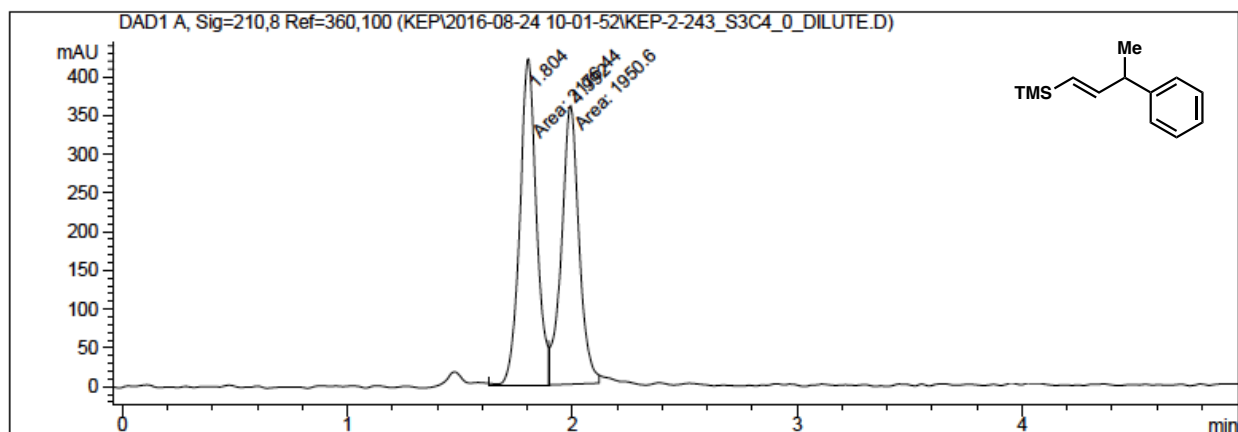

| Peak # | RetTime [min] | Type | Width [min] | Area [mAU*s] | Height [mAU] | Area %  |
|--------|---------------|------|-------------|--------------|--------------|---------|
| 1      | 1.804         | MM   | 0.0852      | 2176.43945   | 425.78909    | 52.7360 |
| 2      | 1.992         | MM   | 0.0896      | 1950.60413   | 362.93353    | 47.2640 |

**3o (Figure 1): enantioenriched, 97% ee**

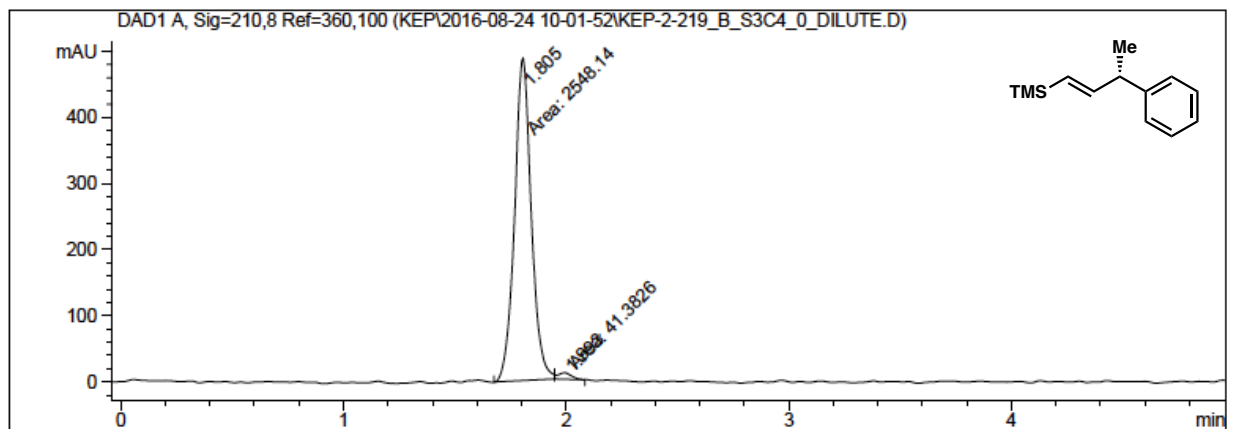

| Peak # | RetTime [min] | Type | Width [min] | Area [mAU*s] | Height [mAU] | Area %  |
|--------|---------------|------|-------------|--------------|--------------|---------|
| 1      | 1.805         | MM   | 0.0863      | 2548.14233   | 492.12225    | 98.4019 |
| 2      | 1.993         | MM   | 0.0681      | 41.38256     | 10.12810     | 1.5981  |



7a (Figure 2): racemic

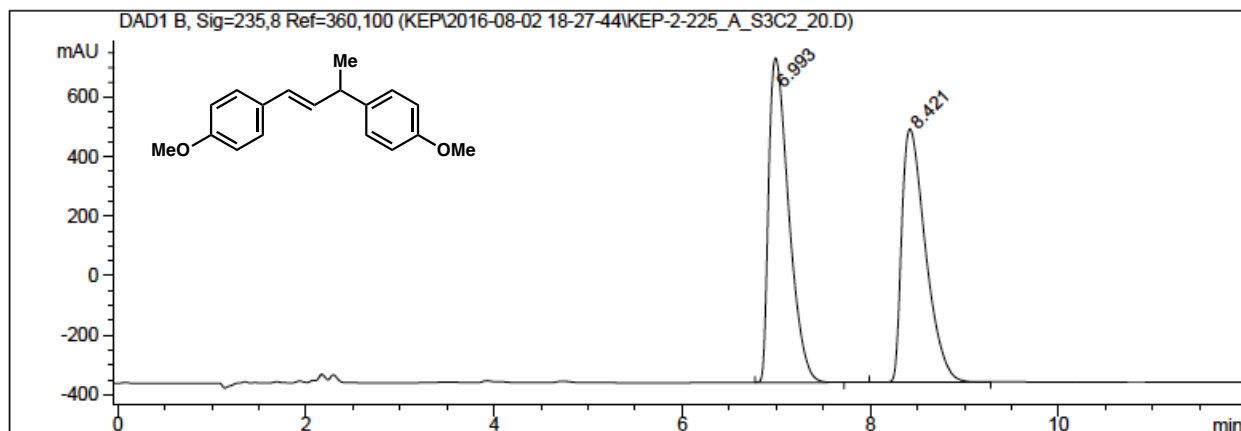

7a (Figure 2): enantioenriched, 93% ee

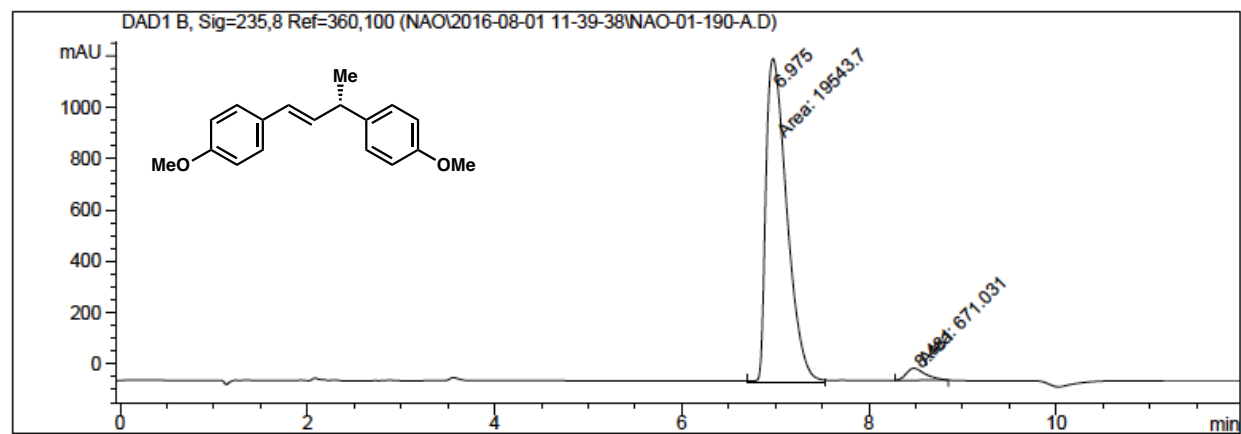

7b (Figure 2): racemic

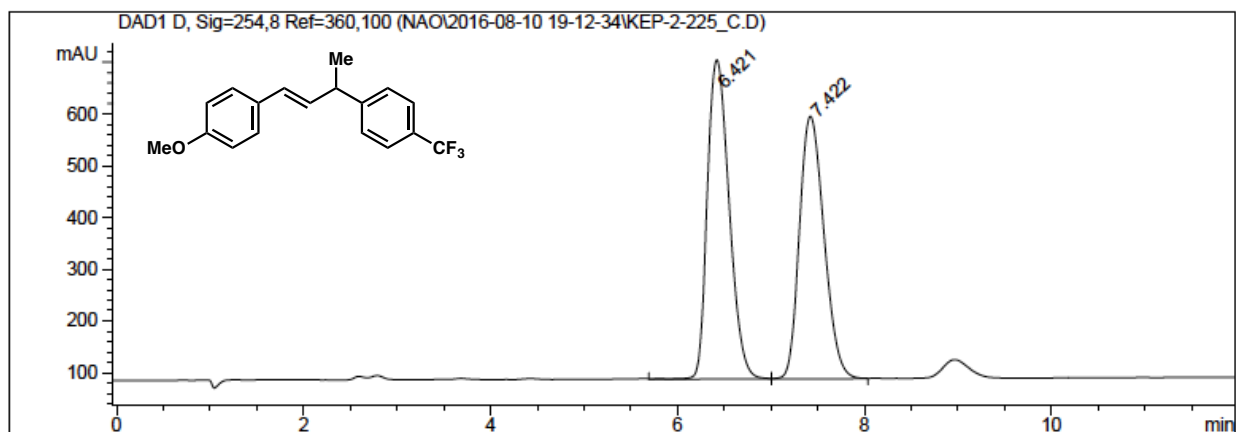

| Peak # | RetTime [min] | Type | Width [min] | Area [mAU*s] | Height [mAU] | Area %  |
|--------|---------------|------|-------------|--------------|--------------|---------|
| 1      | 6.421         | VV   | 0.2579      | 1.00441e4    | 616.96472    | 51.9654 |
| 2      | 7.422         | VV   | 0.2894      | 9284.33398   | 507.48148    | 48.0346 |

7b (Figure 2): enantioenriched, 88% ee

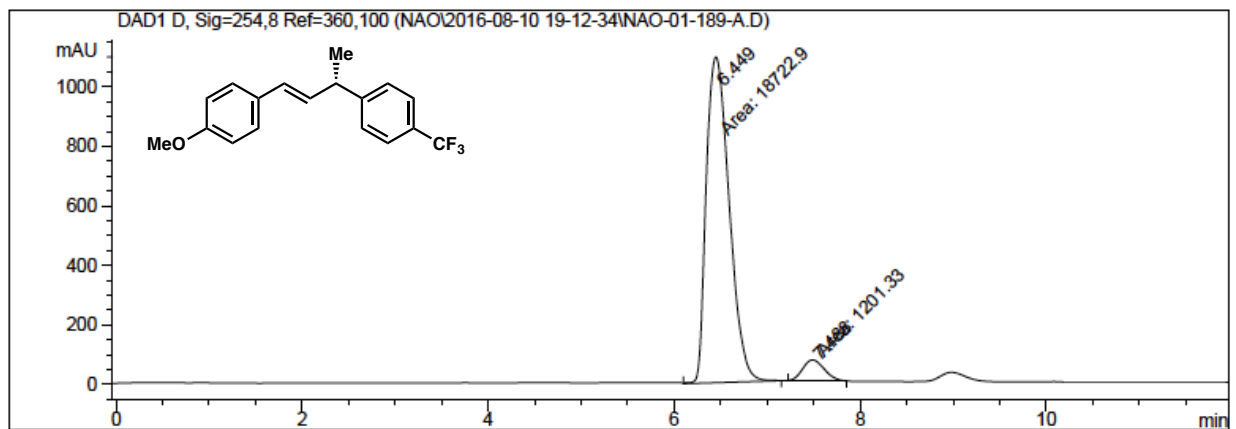

| Peak # | RetTime [min] | Type | Width [min] | Area [mAU*s] | Height [mAU] | Area %  |
|--------|---------------|------|-------------|--------------|--------------|---------|
| 1      | 6.449         | MM   | 0.2851      | 1.87229e4    | 1094.68372   | 93.9705 |
| 2      | 7.488         | MM   | 0.2774      | 1201.33252   | 72.18948     | 6.0295  |

7c (Figure 2): racemic

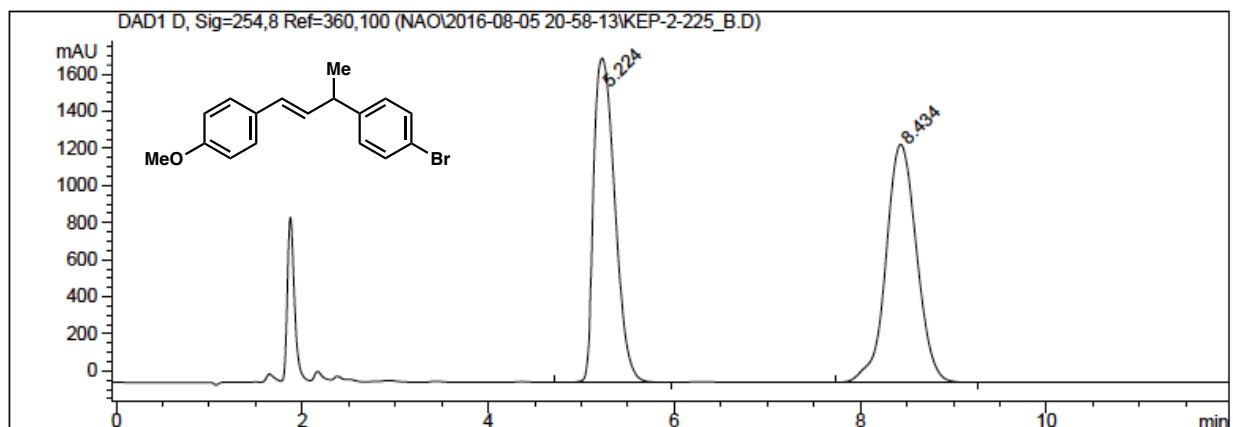

| Peak # | RetTime [min] | Type | Width [min] | Area [mAU*s] | Height [mAU] | Area %  |
|--------|---------------|------|-------------|--------------|--------------|---------|
| 1      | 5.224         | VV   | 0.2570      | 2.77188e4    | 1747.68750   | 48.5460 |
| 2      | 8.434         | BB   | 0.3592      | 2.93793e4    | 1282.85803   | 51.4540 |

7c (Figure 2): enantioenriched, 90% ee

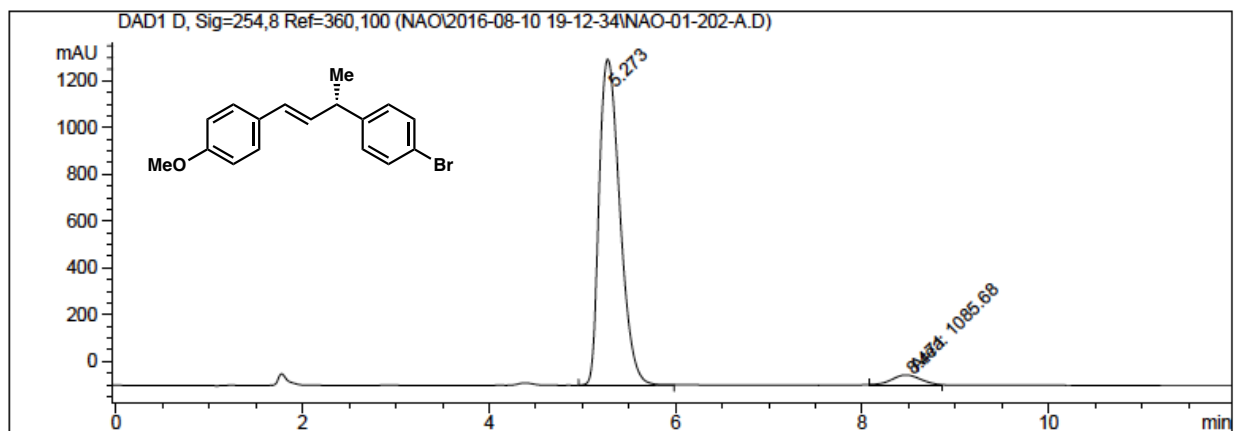

| Peak # | RetTime [min] | Type | Width [min] | Area [mAU*s] | Height [mAU] | Area %  |
|--------|---------------|------|-------------|--------------|--------------|---------|
| 1      | 5.273         | BB   | 0.2445      | 2.15843e4    | 1395.44788   | 95.2109 |
| 2      | 8.471         | MM   | 0.3931      | 1085.67932   | 46.02574     | 4.7891  |

7d (Figure 2): racemic

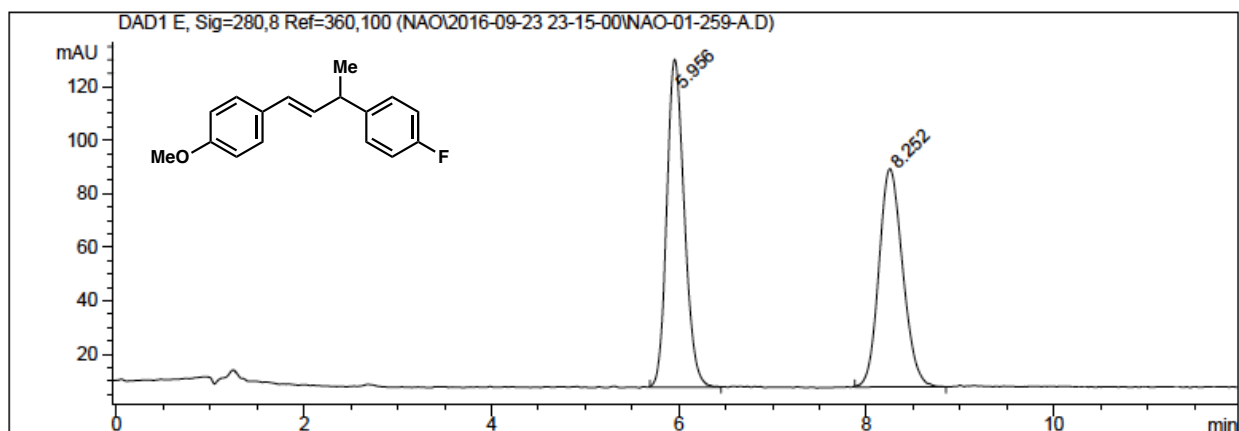

7d (Figure 2): enantioenriched, 92% ee

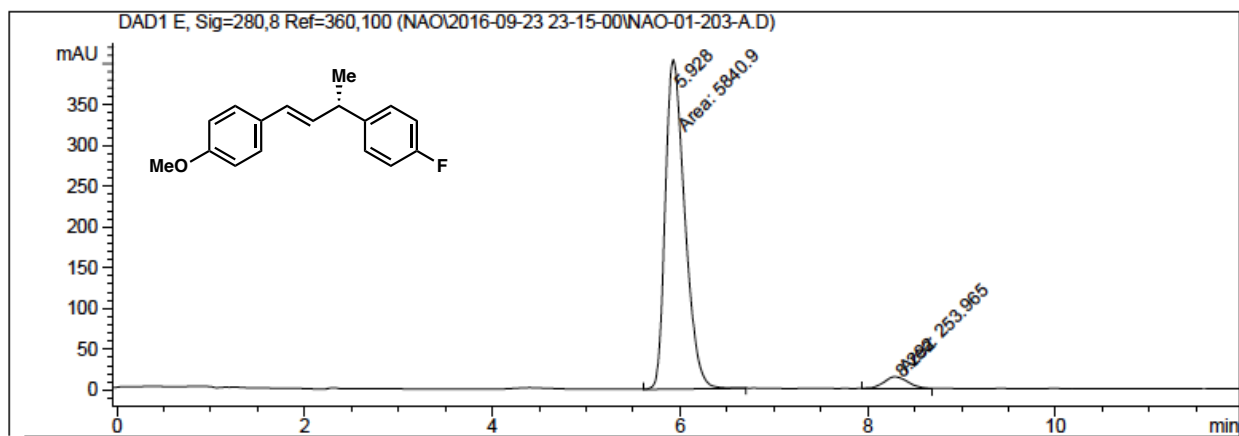

7e (Figure 2): racemic

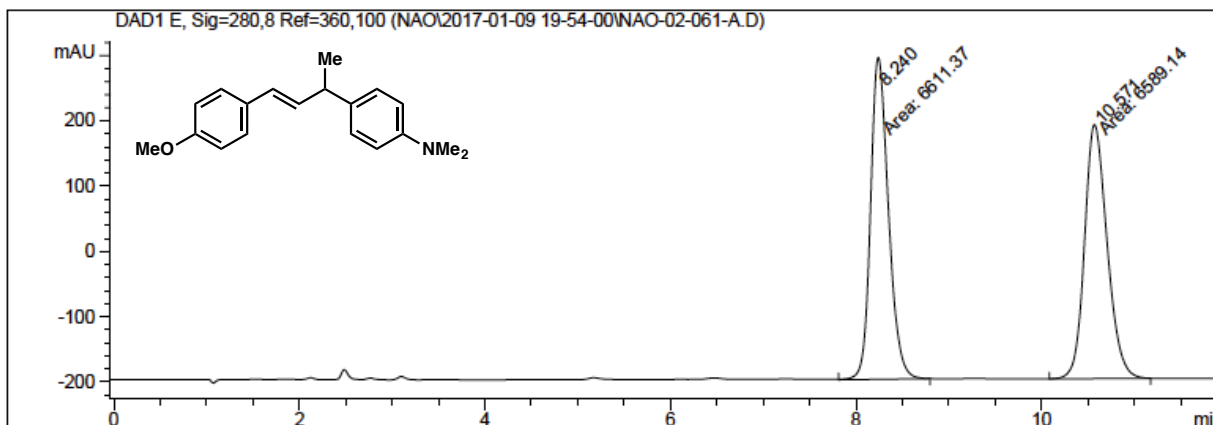

7e (Figure 2): enantioenriched, 94% ee

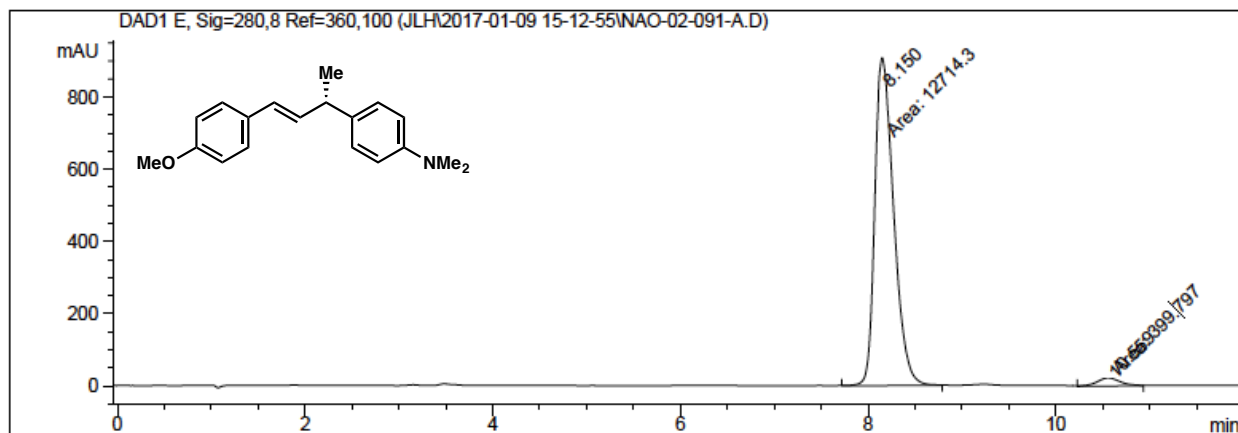

7f (Figure 2): racemic

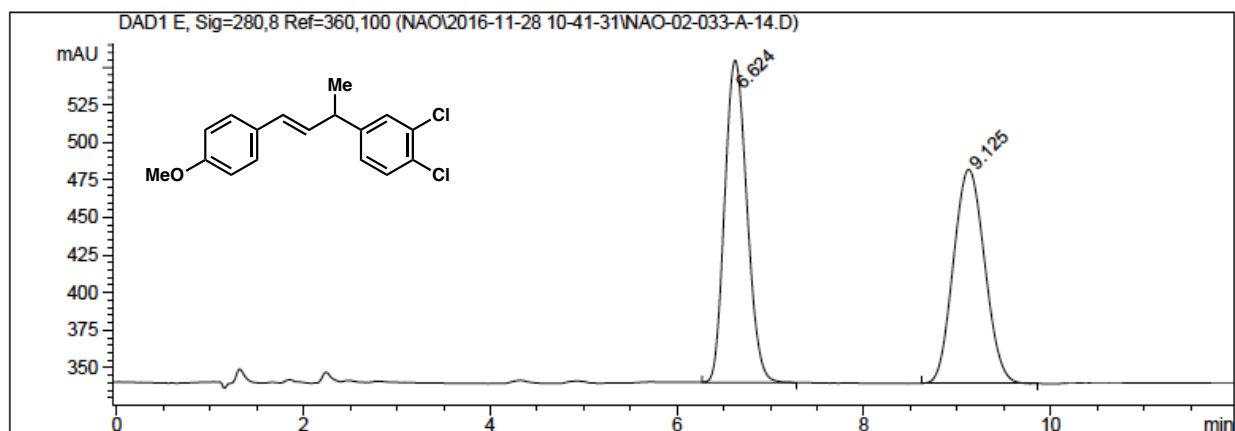

| Peak # | RetTime [min] | Type | Width [min] | Area [mAU*s] | Height [mAU] | Area %  |
|--------|---------------|------|-------------|--------------|--------------|---------|
| 1      | 6.624         | BB   | 0.2651      | 3551.33887   | 214.60269    | 51.6981 |
| 2      | 9.125         | BB   | 0.3717      | 3318.03833   | 142.47495    | 48.3019 |

7f (Figure 2): enantioenriched, 82% ee

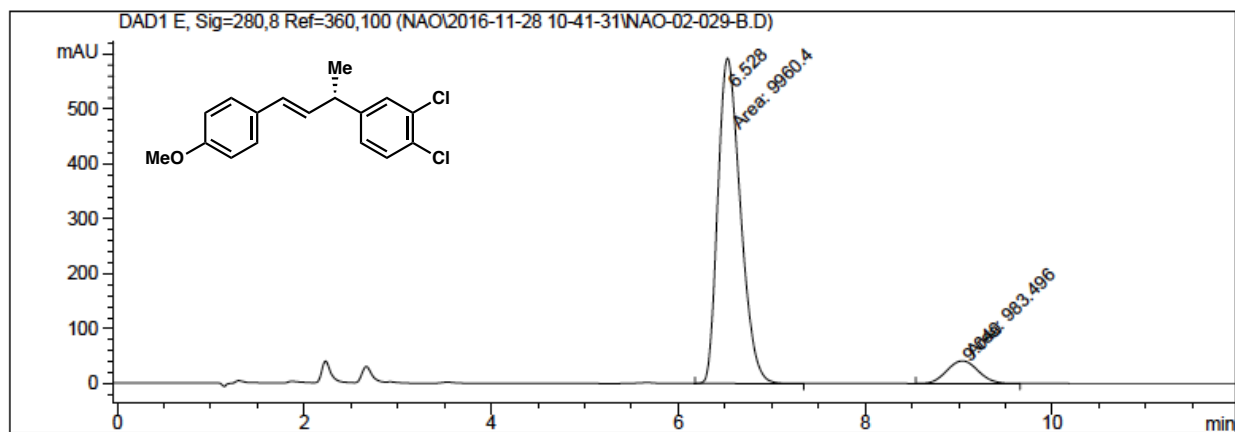

| Peak # | RetTime [min] | Type | Width [min] | Area [mAU*s] | Height [mAU] | Area %  |
|--------|---------------|------|-------------|--------------|--------------|---------|
| 1      | 6.528         | MM   | 0.2800      | 9960.39941   | 592.94763    | 91.0133 |
| 2      | 9.040         | MM   | 0.3921      | 983.49628    | 41.80441     | 8.9867  |

7g (Figure 2): racemic

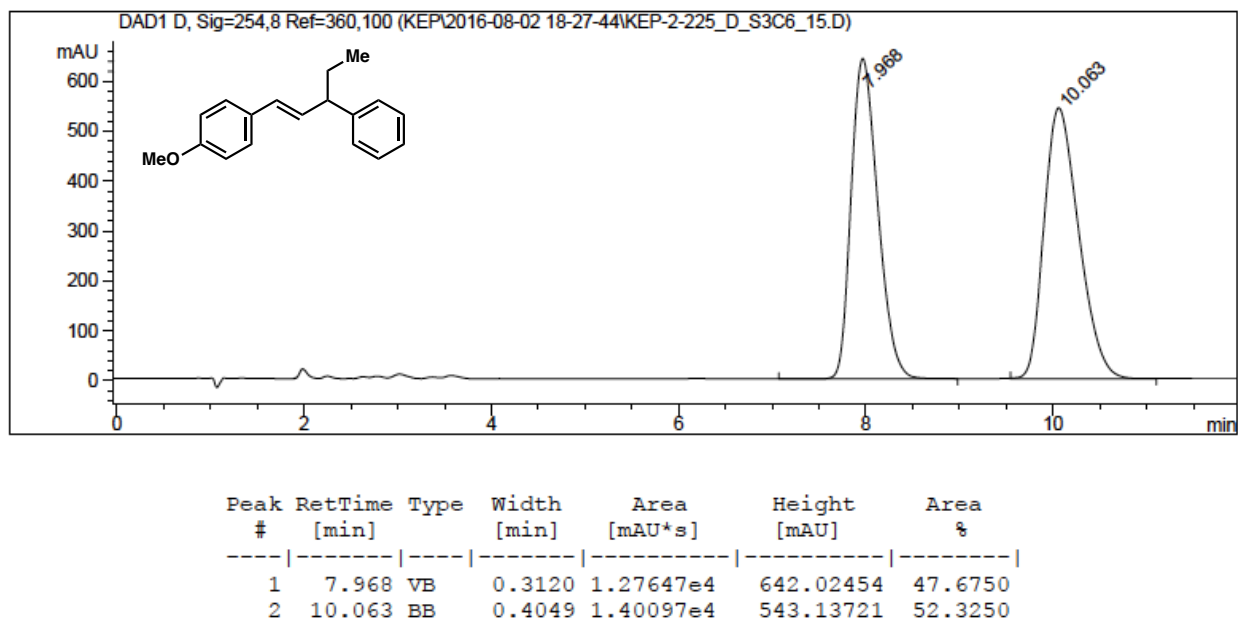

7g (Figure 2): enantioenriched, 97% ee

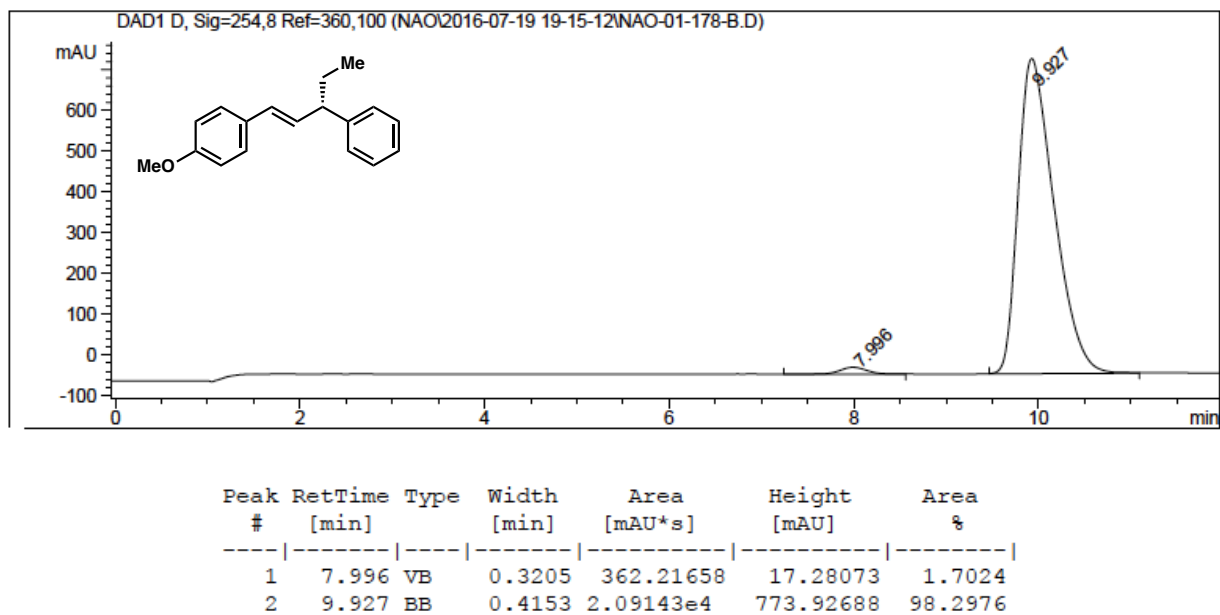

7h (Figure 2): racemic

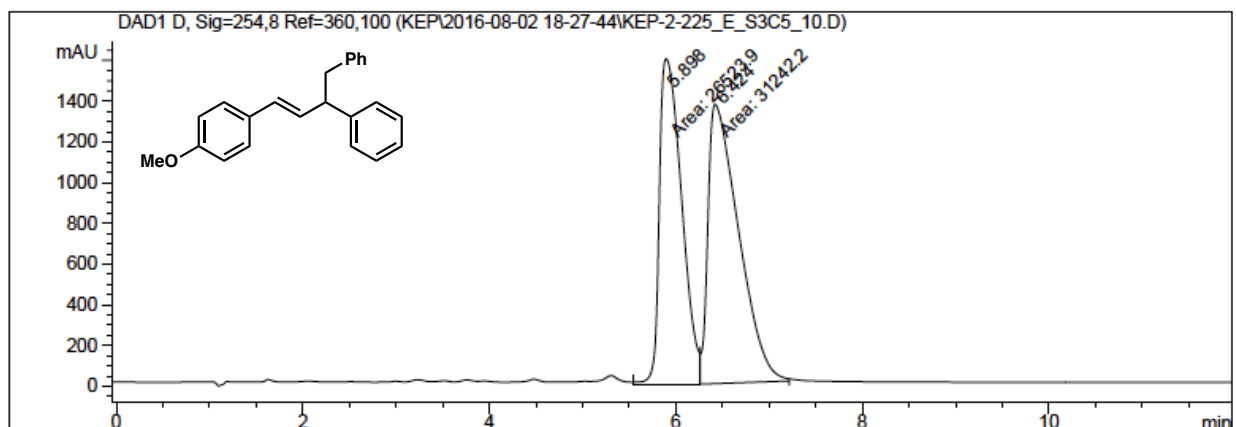

7h (Figure 2): enantioenriched, 95% ee

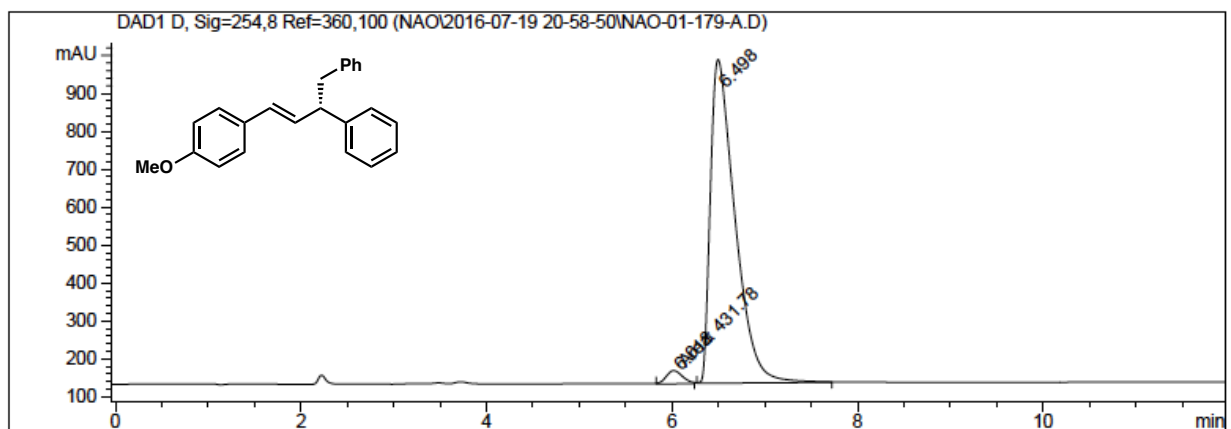



7i (Figure 2): racemic

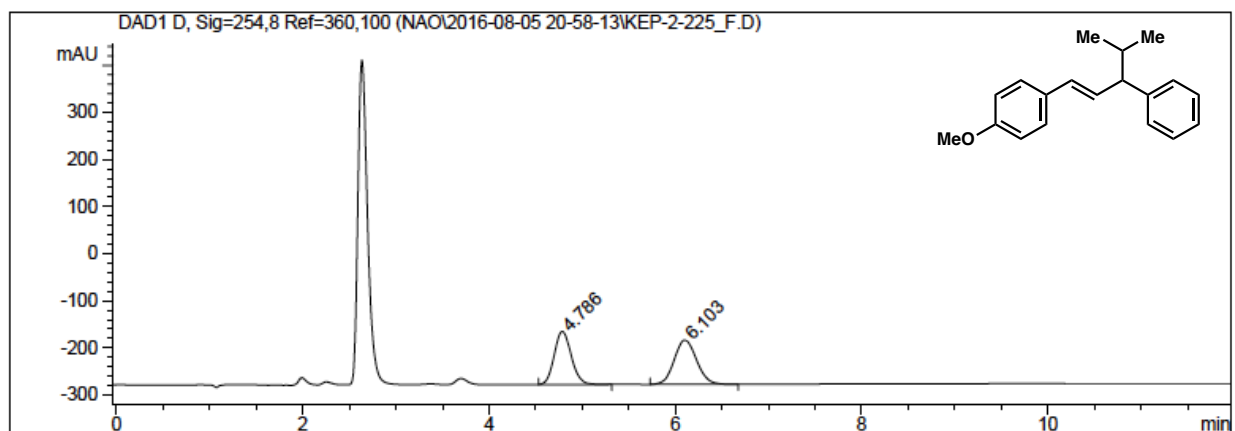

| Peak # | RetTime [min] | Type | Width [min] | Area [mAU*s] | Height [mAU] | Area %  |
|--------|---------------|------|-------------|--------------|--------------|---------|
| 1      | 4.786         | BB   | 0.2004      | 1430.79492   | 112.47615    | 47.8299 |
| 2      | 6.103         | BB   | 0.2619      | 1560.63074   | 93.89527     | 52.1701 |

7i (Figure 2): enantioenriched, 97% ee

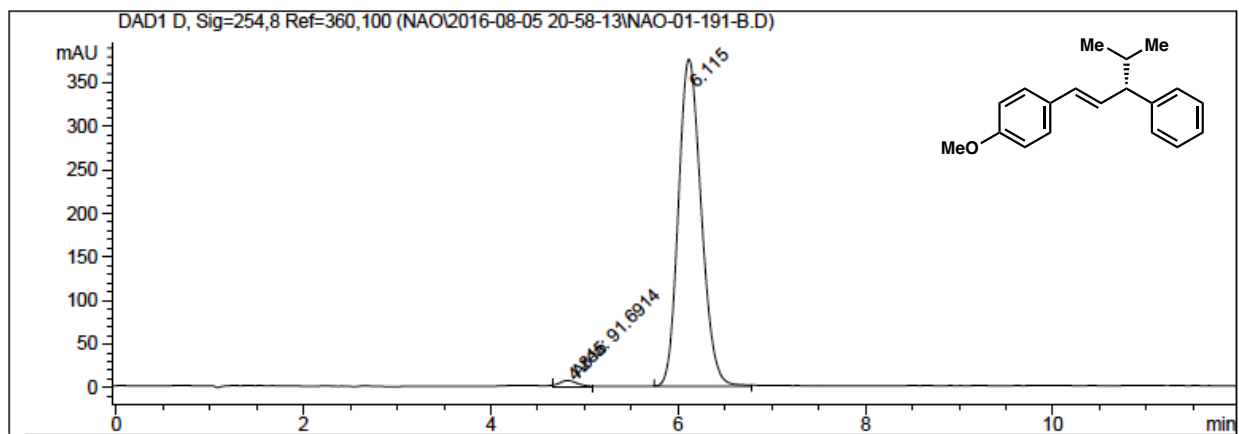

| Peak # | RetTime [min] | Type | Width [min] | Area [mAU*s] | Height [mAU] | Area %  |
|--------|---------------|------|-------------|--------------|--------------|---------|
| 1      | 4.815         | MM   | 0.2214      | 91.69138     | 6.90323      | 1.4194  |
| 2      | 6.115         | BB   | 0.2659      | 6368.25781   | 375.46719    | 98.5806 |

7j (Figure 2): racemic

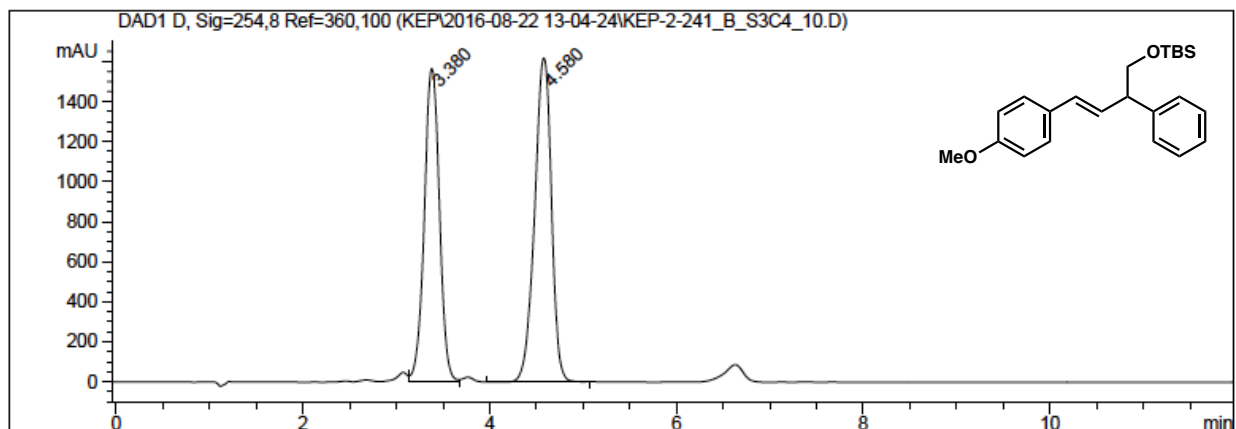

| Peak # | RetTime [min] | Type | Width [min] | Area [mAU*s] | Height [mAU] | Area %  |
|--------|---------------|------|-------------|--------------|--------------|---------|
| 1      | 3.380         | VV   | 0.1763      | 1.77440e4    | 1565.27930   | 46.6268 |
| 2      | 4.580         | VB   | 0.1945      | 2.03113e4    | 1617.50305   | 53.3732 |

7j (Figure 2): enantioenriched, 98% ee

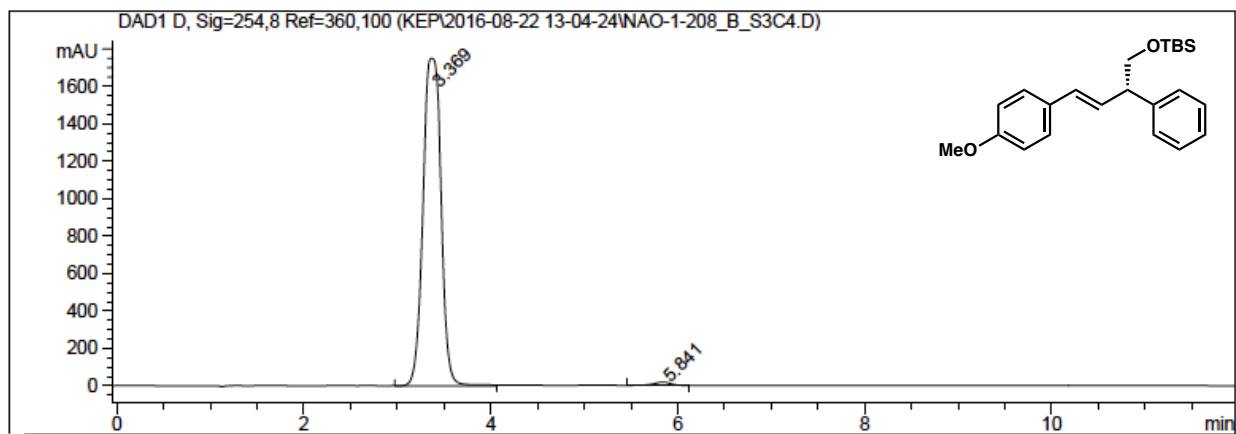

| Peak # | RetTime [min] | Type | Width [min] | Area [mAU*s] | Height [mAU] | Area %  |
|--------|---------------|------|-------------|--------------|--------------|---------|
| 1      | 3.369         | VV   | 0.2126      | 2.34730e4    | 1748.39075   | 98.8511 |
| 2      | 5.841         | BV   | 0.2029      | 272.82288    | 19.07364     | 1.1489  |

7k (Figure 2): racemic

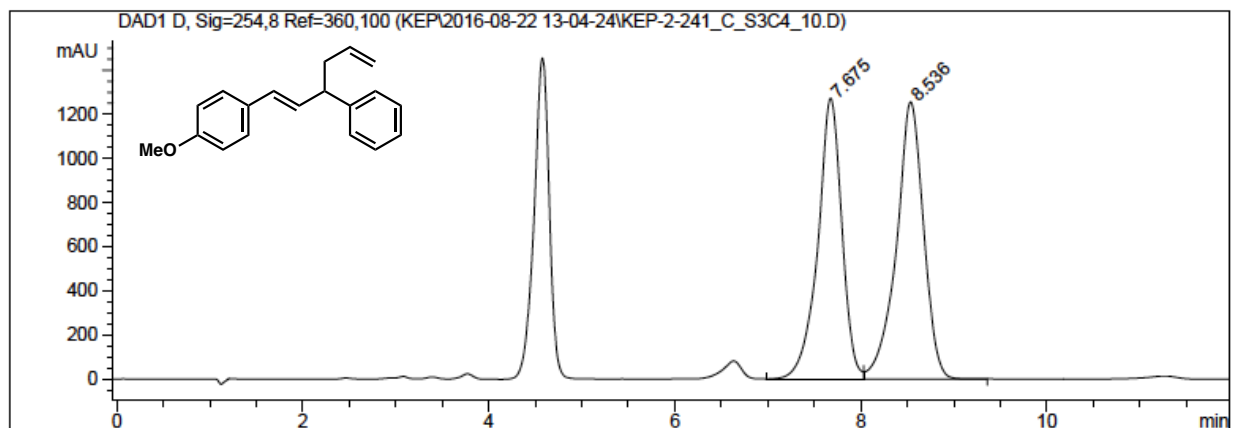

| Peak # | RetTime [min] | Type | Width [min] | Area [mAU*s] | Height [mAU] | Area %  |
|--------|---------------|------|-------------|--------------|--------------|---------|
| 1      | 7.675         | VV   | 0.2662      | 2.29359e4    | 1273.26990   | 47.2708 |
| 2      | 8.536         | VB   | 0.3014      | 2.55844e4    | 1257.12512   | 52.7292 |

7k (Figure 2): enantioenriched, 96% ee

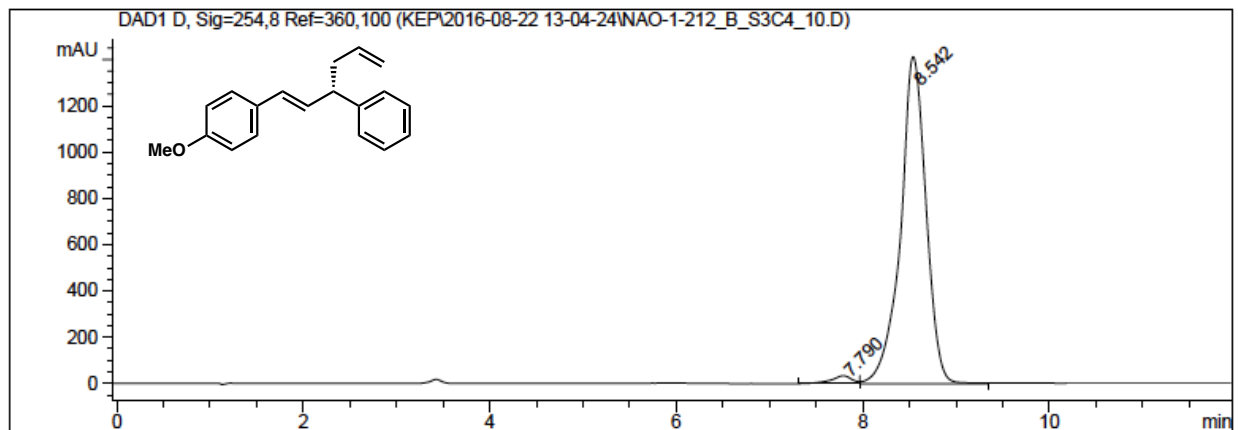

| Peak # | RetTime [min] | Type | Width [min] | Area [mAU*s] | Height [mAU] | Area %  |
|--------|---------------|------|-------------|--------------|--------------|---------|
| 1      | 7.790         | BV   | 0.2268      | 537.98590    | 34.33280     | 1.9596  |
| 2      | 8.542         | VB   | 0.2824      | 2.69158e4    | 1411.98352   | 98.0404 |

7I (Figure 2): racemic

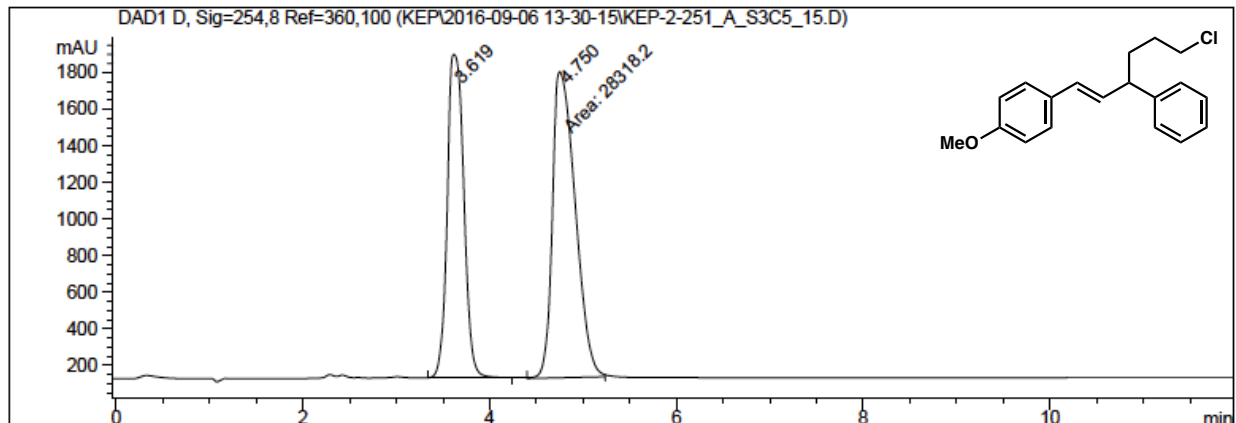

| Peak # | RetTime [min] | Type | Width [min] | Area [mAU*s] | Height [mAU] | Area %  |
|--------|---------------|------|-------------|--------------|--------------|---------|
| 1      | 3.619         | BV   | 0.1967      | 2.19414e4    | 1769.60486   | 43.6562 |
| 2      | 4.750         | MM   | 0.2819      | 2.83182e4    | 1673.98267   | 56.3438 |

7I (Figure 2): enantioenriched, 93% ee

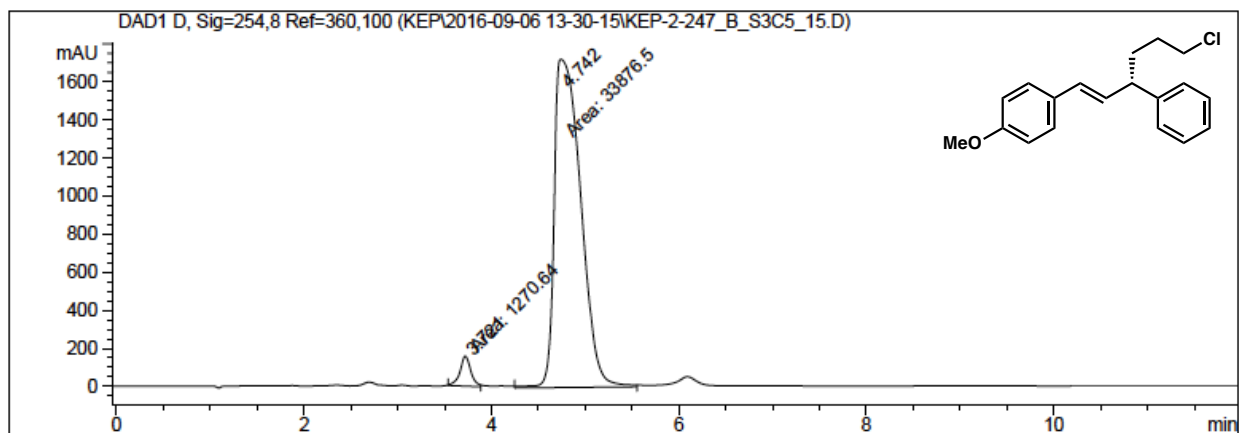

| Peak # | RetTime [min] | Type | Width [min] | Area [mAU*s] | Height [mAU] | Area %  |
|--------|---------------|------|-------------|--------------|--------------|---------|
| 1      | 3.721         | MM   | 0.1339      | 1270.64075   | 158.21689    | 3.6152  |
| 2      | 4.742         | MM   | 0.3274      | 3.38765e4    | 1724.49841   | 96.3848 |

9 (Scheme 2): racemic

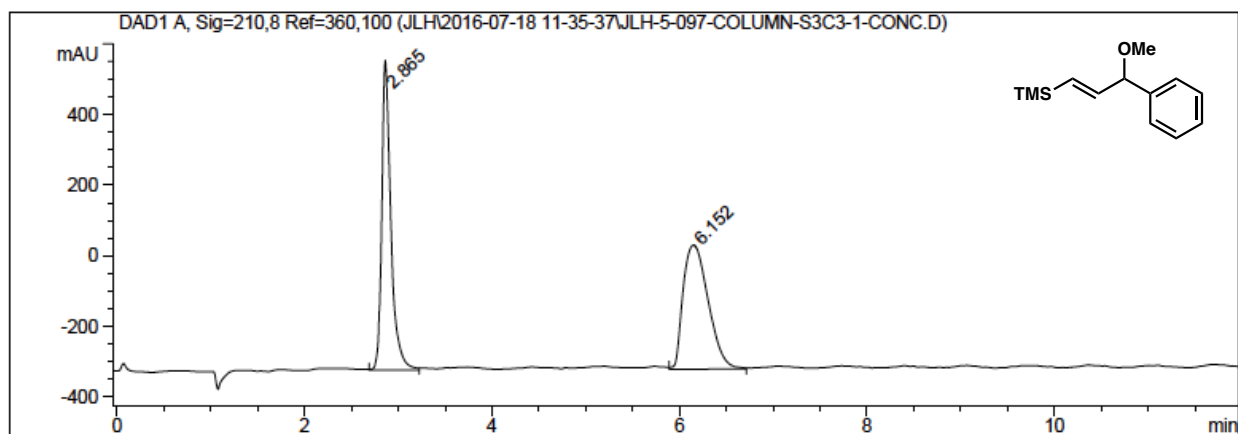

| Peak # | RetTime [min] | Type | Width [min] | Area [mAU*s] | Height [mAU] | Area %  |
|--------|---------------|------|-------------|--------------|--------------|---------|
| 1      | 2.865         | VV   | 0.1036      | 5942.20703   | 870.57599    | 47.5931 |
| 2      | 6.152         | VV   | 0.2969      | 6543.22803   | 351.95050    | 52.4069 |

9 (Scheme 2): enantioenriched, 91% ee

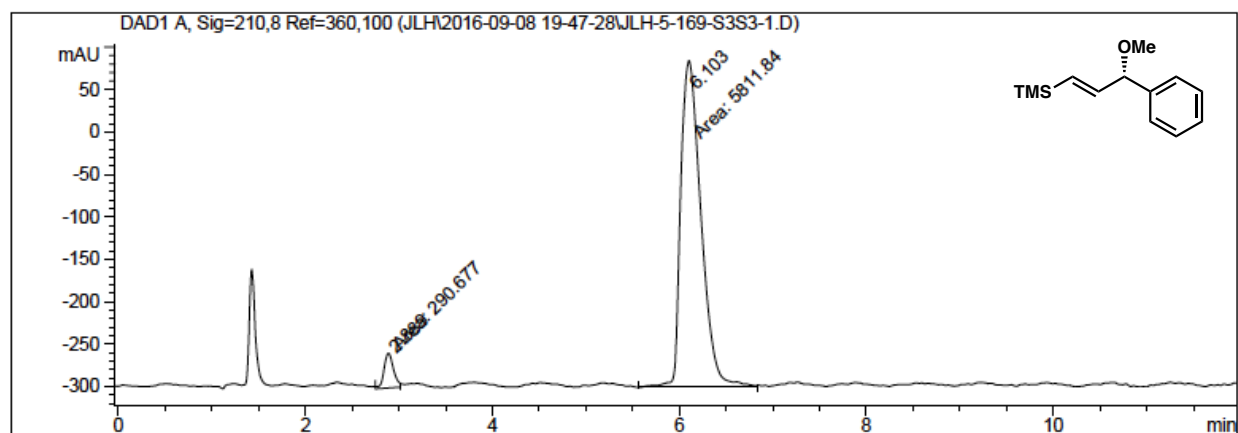

| Peak # | RetTime [min] | Type | Width [min] | Area [mAU*s] | Height [mAU] | Area %  |
|--------|---------------|------|-------------|--------------|--------------|---------|
| 1      | 2.889         | MM   | 0.1180      | 290.67731    | 41.05857     | 4.7632  |
| 2      | 6.103         | MM   | 0.2515      | 5811.83789   | 385.08493    | 95.2368 |

## 9. X-ray Coordinate Tables for 4b

**Table S4. Atomic coordinates ( $\times 10^4$ ) and equivalent isotropic displacement parameters ( $\text{\AA}^2 \times 10^3$ ) for 4b. U(eq) is defined as one third of the trace of the orthogonalized  $U^{ij}$  tensor.**

|       | x       | y        | z       | U(eq) |
|-------|---------|----------|---------|-------|
| Br(2) | 7158(1) | 11159(1) | 5902(1) | 23(1) |
| Ni(1) | 5957(1) | 10344(1) | 5110(1) | 17(1) |
| C(1)  | 7148(5) | 7425(5)  | 5379(2) | 17(1) |
| N(1)  | 5905(5) | 8301(5)  | 5263(2) | 16(1) |
| C(11) | 3313(6) | 7916(6)  | 5247(2) | 20(1) |
| O(1)  | 5007(5) | 6190(5)  | 5481(2) | 25(1) |
| C(2)  | 6524(6) | 5978(6)  | 5538(3) | 20(1) |
| C(10) | 4805(6) | 7514(6)  | 5330(2) | 18(1) |
| Br(1) | 6632(1) | 11327(1) | 4262(1) | 27(1) |
| C(14) | 3027(5) | 9366(5)  | 5081(3) | 17(1) |
| O(2)  | 1668(5) | 9629(5)  | 4965(2) | 23(1) |
| N(2)  | 3874(5) | 10395(5) | 5047(2) | 17(1) |
| C(16) | 1592(6) | 11077(6) | 4742(3) | 22(1) |
| C(23) | 2719(6) | 12545(5) | 5415(3) | 19(1) |
| C(9)  | 8035(5) | 7124(6)  | 4876(2) | 18(1) |
| C(19) | 748(7)  | 13449(6) | 5936(3) | 28(1) |
| C(18) | 1270(6) | 12687(6) | 5487(3) | 23(1) |
| C(8)  | 8818(6) | 8080(6)  | 4570(3) | 22(1) |
| C(20) | 1676(8) | 14047(7) | 6297(3) | 27(1) |
| C(15) | 3037(6) | 11685(6) | 4910(3) | 21(1) |
| C(6)  | 9544(7) | 6152(7)  | 3987(3) | 25(1) |
| C(12) | 2328(7) | 6732(6)  | 5060(4) | 30(1) |
| C(3)  | 7058(8) | 4881(6)  | 5125(3) | 28(1) |
| C(7)  | 9565(6) | 7606(7)  | 4124(3) | 24(1) |
| C(22) | 3654(6) | 13140(6) | 5781(3) | 24(1) |
| C(4)  | 7974(6) | 5693(6)  | 4733(3) | 21(1) |
| C(5)  | 8719(7) | 5204(6)  | 4282(3) | 23(1) |
| C(17) | 465(6)  | 11933(7) | 5034(3) | 27(1) |
| C(13) | 2195(7) | 7222(7)  | 5622(3) | 28(1) |
| C(21) | 3118(8) | 13895(7) | 6230(3) | 28(1) |

**Table S5. Bond lengths [Å] and angles [°] for 4b.**

---

|             |            |
|-------------|------------|
| Br(2)-Ni(1) | 2.3747(10) |
| Ni(1)-N(1)  | 1.973(5)   |
| Ni(1)-Br(1) | 2.3583(10) |
| Ni(1)-N(2)  | 1.981(5)   |
| C(1)-H(1)   | 1.0000     |
| C(1)-N(1)   | 1.471(7)   |
| C(1)-C(2)   | 1.544(8)   |
| C(1)-C(9)   | 1.516(8)   |
| N(1)-C(10)  | 1.293(7)   |
| C(11)-C(10) | 1.479(8)   |
| C(11)-C(14) | 1.459(7)   |
| C(11)-C(12) | 1.530(8)   |
| C(11)-C(13) | 1.549(9)   |
| O(1)-C(2)   | 1.459(7)   |
| O(1)-C(10)  | 1.323(7)   |
| C(2)-H(2)   | 1.0000     |
| C(2)-C(3)   | 1.534(9)   |
| C(14)-O(2)  | 1.344(7)   |
| C(14)-N(2)  | 1.266(7)   |
| O(2)-C(16)  | 1.479(7)   |
| N(2)-C(15)  | 1.496(7)   |
| C(16)-H(16) | 1.0000     |
| C(16)-C(15) | 1.542(9)   |
| C(16)-C(17) | 1.521(9)   |
| C(23)-C(18) | 1.391(8)   |
| C(23)-C(15) | 1.509(9)   |
| C(23)-C(22) | 1.380(9)   |
| C(9)-C(8)   | 1.389(9)   |
| C(9)-C(4)   | 1.402(8)   |
| C(19)-H(19) | 0.9500     |
| C(19)-C(18) | 1.404(9)   |
| C(19)-C(20) | 1.369(11)  |
| C(18)-C(17) | 1.522(10)  |
| C(8)-H(8)   | 0.9500     |
| C(8)-C(7)   | 1.374(9)   |
| C(20)-H(20) | 0.9500     |
| C(20)-C(21) | 1.384(10)  |
| C(15)-H(15) | 1.0000     |

|                   |            |
|-------------------|------------|
| C(6)-H(6)         | 0.9500     |
| C(6)-C(7)         | 1.419(10)  |
| C(6)-C(5)         | 1.392(10)  |
| C(12)-H(12A)      | 0.9900     |
| C(12)-H(12B)      | 0.9900     |
| C(12)-C(13)       | 1.454(12)  |
| C(3)-H(3A)        | 0.9900     |
| C(3)-H(3B)        | 0.9900     |
| C(3)-C(4)         | 1.504(9)   |
| C(7)-H(7)         | 0.9500     |
| C(22)-H(22)       | 0.9500     |
| C(22)-C(21)       | 1.405(9)   |
| C(4)-C(5)         | 1.388(9)   |
| C(5)-H(5)         | 0.9500     |
| C(17)-H(17A)      | 0.9900     |
| C(17)-H(17B)      | 0.9900     |
| C(13)-H(13A)      | 0.9900     |
| C(13)-H(13B)      | 0.9900     |
| C(21)-H(21)       | 0.9500     |
|                   |            |
| N(1)-Ni(1)-Br(2)  | 100.22(14) |
| N(1)-Ni(1)-Br(1)  | 124.10(14) |
| N(1)-Ni(1)-N(2)   | 90.77(19)  |
| Br(1)-Ni(1)-Br(2) | 117.13(4)  |
| N(2)-Ni(1)-Br(2)  | 122.24(15) |
| N(2)-Ni(1)-Br(1)  | 101.14(14) |
| N(1)-C(1)-H(1)    | 111.6      |
| N(1)-C(1)-C(2)    | 104.1(4)   |
| N(1)-C(1)-C(9)    | 113.2(5)   |
| C(2)-C(1)-H(1)    | 111.6      |
| C(9)-C(1)-H(1)    | 111.6      |
| C(9)-C(1)-C(2)    | 104.4(4)   |
| C(1)-N(1)-Ni(1)   | 124.8(4)   |
| C(10)-N(1)-Ni(1)  | 127.7(4)   |
| C(10)-N(1)-C(1)   | 107.2(5)   |
| C(10)-C(11)-C(12) | 115.8(5)   |
| C(10)-C(11)-C(13) | 117.7(5)   |
| C(14)-C(11)-C(10) | 117.3(5)   |
| C(14)-C(11)-C(12) | 119.7(5)   |
| C(14)-C(11)-C(13) | 115.9(5)   |



|                   |          |
|-------------------|----------|
| C(12)-C(11)-C(13) | 56.4(5)  |
| C(10)-O(1)-C(2)   | 107.5(4) |
| C(1)-C(2)-H(2)    | 111.4    |
| O(1)-C(2)-C(1)    | 103.4(4) |
| O(1)-C(2)-H(2)    | 111.4    |
| O(1)-C(2)-C(3)    | 110.9(5) |
| C(3)-C(2)-C(1)    | 108.1(5) |
| C(3)-C(2)-H(2)    | 111.4    |
| N(1)-C(10)-C(11)  | 127.2(5) |
| N(1)-C(10)-O(1)   | 117.8(5) |
| O(1)-C(10)-C(11)  | 114.9(5) |
| O(2)-C(14)-C(11)  | 114.3(5) |
| N(2)-C(14)-C(11)  | 128.8(5) |
| N(2)-C(14)-O(2)   | 116.9(5) |
| C(14)-O(2)-C(16)  | 107.2(4) |
| C(14)-N(2)-Ni(1)  | 127.5(4) |
| C(14)-N(2)-C(15)  | 107.9(4) |
| C(15)-N(2)-Ni(1)  | 124.5(4) |
| O(2)-C(16)-H(16)  | 112.0    |
| O(2)-C(16)-C(15)  | 101.9(4) |
| O(2)-C(16)-C(17)  | 110.9(5) |
| C(15)-C(16)-H(16) | 112.0    |
| C(17)-C(16)-H(16) | 112.0    |
| C(17)-C(16)-C(15) | 107.5(5) |
| C(18)-C(23)-C(15) | 110.6(5) |
| C(22)-C(23)-C(18) | 120.9(6) |
| C(22)-C(23)-C(15) | 128.5(5) |
| C(8)-C(9)-C(1)    | 127.5(5) |
| C(8)-C(9)-C(4)    | 121.3(5) |
| C(4)-C(9)-C(1)    | 111.1(5) |
| C(18)-C(19)-H(19) | 120.4    |
| C(20)-C(19)-H(19) | 120.4    |
| C(20)-C(19)-C(18) | 119.3(6) |
| C(23)-C(18)-C(19) | 119.8(6) |
| C(23)-C(18)-C(17) | 111.0(5) |
| C(19)-C(18)-C(17) | 129.2(6) |
| C(9)-C(8)-H(8)    | 120.4    |
| C(7)-C(8)-C(9)    | 119.2(6) |
| C(7)-C(8)-H(8)    | 120.4    |
| C(19)-C(20)-H(20) | 119.4    |

|                     |          |
|---------------------|----------|
| C(19)-C(20)-C(21)   | 121.1(6) |
| C(21)-C(20)-H(20)   | 119.4    |
| N(2)-C(15)-C(16)    | 103.0(5) |
| N(2)-C(15)-C(23)    | 111.4(5) |
| N(2)-C(15)-H(15)    | 112.6    |
| C(16)-C(15)-H(15)   | 112.6    |
| C(23)-C(15)-C(16)   | 104.0(5) |
| C(23)-C(15)-H(15)   | 112.6    |
| C(7)-C(6)-H(6)      | 119.6    |
| C(5)-C(6)-H(6)      | 119.6    |
| C(5)-C(6)-C(7)      | 120.9(6) |
| C(11)-C(12)-H(12A)  | 117.5    |
| C(11)-C(12)-H(12B)  | 117.5    |
| H(12A)-C(12)-H(12B) | 114.6    |
| C(13)-C(12)-C(11)   | 62.5(4)  |
| C(13)-C(12)-H(12A)  | 117.5    |
| C(13)-C(12)-H(12B)  | 117.5    |
| C(2)-C(3)-H(3A)     | 110.7    |
| C(2)-C(3)-H(3B)     | 110.7    |
| H(3A)-C(3)-H(3B)    | 108.8    |
| C(4)-C(3)-C(2)      | 105.2(5) |
| C(4)-C(3)-H(3A)     | 110.7    |
| C(4)-C(3)-H(3B)     | 110.7    |
| C(8)-C(7)-C(6)      | 119.8(6) |
| C(8)-C(7)-H(7)      | 120.1    |
| C(6)-C(7)-H(7)      | 120.1    |
| C(23)-C(22)-H(22)   | 120.6    |
| C(23)-C(22)-C(21)   | 118.8(6) |
| C(21)-C(22)-H(22)   | 120.6    |
| C(9)-C(4)-C(3)      | 111.2(5) |
| C(5)-C(4)-C(9)      | 120.0(6) |
| C(5)-C(4)-C(3)      | 128.9(5) |
| C(6)-C(5)-H(5)      | 120.6    |
| C(4)-C(5)-C(6)      | 118.7(5) |
| C(4)-C(5)-H(5)      | 120.6    |
| C(16)-C(17)-C(18)   | 103.8(5) |
| C(16)-C(17)-H(17A)  | 111.0    |
| C(16)-C(17)-H(17B)  | 111.0    |
| C(18)-C(17)-H(17A)  | 111.0    |
| C(18)-C(17)-H(17B)  | 111.0    |

|                     |          |
|---------------------|----------|
| H(17A)-C(17)-H(17B) | 109.0    |
| C(11)-C(13)-H(13A)  | 117.7    |
| C(11)-C(13)-H(13B)  | 117.7    |
| C(12)-C(13)-C(11)   | 61.2(4)  |
| C(12)-C(13)-H(13A)  | 117.7    |
| C(12)-C(13)-H(13B)  | 117.7    |
| H(13A)-C(13)-H(13B) | 114.8    |
| C(20)-C(21)-C(22)   | 120.1(7) |
| C(20)-C(21)-H(21)   | 119.9    |
| C(22)-C(21)-H(21)   | 119.9    |

---

**Table S6. Anisotropic displacement parameters ( $\text{\AA}^2 \times 10^3$ ) for 4b. The anisotropic displacement factor exponent takes the form:  $-2p^2 [h^2 a^{*2} U^{11} + \dots + 2 h k a^* b^* U^{12}]$**

|       | U <sup>11</sup> | U <sup>22</sup> | U <sup>33</sup> | U <sup>23</sup> | U <sup>13</sup> | U <sup>12</sup> |
|-------|-----------------|-----------------|-----------------|-----------------|-----------------|-----------------|
| Br(2) | 20(1)           | 21(1)           | 28(1)           | 1(1)            | -3(1)           | -5(1)           |
| Ni(1) | 11(1)           | 14(1)           | 25(1)           | 3(1)            | 0(1)            | -2(1)           |
| C(1)  | 12(2)           | 14(2)           | 26(2)           | -1(2)           | -2(2)           | 4(2)            |
| N(1)  | 12(2)           | 16(2)           | 20(2)           | 0(1)            | 0(1)            | 2(1)            |
| C(11) | 14(2)           | 13(2)           | 32(3)           | 0(2)            | -2(2)           | 4(2)            |
| O(1)  | 15(2)           | 12(2)           | 48(3)           | 1(2)            | -1(2)           | 2(1)            |
| C(2)  | 19(2)           | 12(2)           | 30(3)           | 4(2)            | -1(2)           | 5(2)            |
| C(10) | 17(2)           | 15(2)           | 23(2)           | 1(2)            | -1(2)           | 2(2)            |
| Br(1) | 24(1)           | 31(1)           | 25(1)           | 8(1)            | 4(1)            | -1(1)           |
| C(14) | 10(2)           | 16(2)           | 26(2)           | 1(2)            | -2(2)           | 3(1)            |
| O(2)  | 13(2)           | 18(2)           | 38(2)           | 4(2)            | -3(2)           | 3(1)            |
| N(2)  | 11(2)           | 18(2)           | 22(2)           | 2(2)            | 2(1)            | 5(1)            |
| C(16) | 16(2)           | 17(2)           | 32(3)           | 6(2)            | -1(2)           | 6(2)            |
| C(23) | 17(2)           | 9(2)            | 32(3)           | 5(2)            | 5(2)            | 2(2)            |
| C(9)  | 8(2)            | 17(2)           | 27(2)           | -3(2)           | -3(2)           | 2(2)            |
| C(19) | 24(2)           | 18(2)           | 41(3)           | 4(2)            | 10(2)           | -6(2)           |
| C(18) | 19(2)           | 15(2)           | 34(3)           | 4(2)            | 5(2)            | 2(2)            |
| C(8)  | 15(2)           | 20(2)           | 31(3)           | -4(2)           | 2(2)            | 2(2)            |
| C(20) | 30(3)           | 18(2)           | 34(3)           | 1(2)            | 12(2)           | 5(2)            |
| C(15) | 15(2)           | 18(2)           | 28(2)           | 6(2)            | 2(2)            | 9(2)            |
| C(6)  | 20(2)           | 27(3)           | 28(3)           | -2(2)           | -2(2)           | 11(2)           |
| C(12) | 15(2)           | 13(2)           | 61(4)           | -3(2)           | -7(2)           | -4(2)           |
| C(3)  | 35(3)           | 12(2)           | 37(3)           | 2(2)            | 7(3)            | 0(2)            |
| C(7)  | 15(2)           | 27(3)           | 30(3)           | 1(2)            | 2(2)            | 5(2)            |
| C(22) | 18(2)           | 13(2)           | 40(3)           | 5(2)            | 3(2)            | 1(2)            |
| C(4)  | 20(2)           | 14(2)           | 27(2)           | 1(2)            | -2(2)           | 3(2)            |
| C(5)  | 24(2)           | 18(2)           | 27(2)           | -4(2)           | -2(2)           | 6(2)            |
| C(17) | 15(2)           | 20(2)           | 48(4)           | 2(2)            | -3(2)           | 2(2)            |
| C(13) | 15(2)           | 22(3)           | 48(4)           | 9(2)            | 3(2)            | -7(2)           |
| C(21) | 34(3)           | 19(2)           | 31(3)           | -1(2)           | 4(2)            | 5(2)            |

**Table S7. Hydrogen coordinates ( $\times 10^4$ ) and isotropic displacement parameters ( $\text{\AA}^2 \times 10^3$ ) for 4b.**

|        | x     | y     | z    | U(eq) |
|--------|-------|-------|------|-------|
| H(1)   | 7730  | 7830  | 5682 | 21    |
| H(2)   | 6782  | 5713  | 5921 | 24    |
| H(16)  | 1459  | 11081 | 4335 | 26    |
| H(19)  | -240  | 13548 | 5989 | 33    |
| H(8)   | 8837  | 9049  | 4668 | 26    |
| H(20)  | 1326  | 14574 | 6598 | 33    |
| H(15)  | 3481  | 12258 | 4612 | 25    |
| H(6)   | 10100 | 5821  | 3690 | 30    |
| H(12A) | 1564  | 6980  | 4802 | 36    |
| H(12B) | 2748  | 5788  | 5001 | 36    |
| H(3A)  | 7610  | 4137  | 5312 | 34    |
| H(3B)  | 6260  | 4435  | 4929 | 34    |
| H(7)   | 10095 | 8250  | 3909 | 29    |
| H(22)  | 4642  | 13041 | 5730 | 29    |
| H(5)   | 8665  | 4242  | 4176 | 28    |
| H(17A) | -274  | 11311 | 5189 | 33    |
| H(17B) | 18    | 12618 | 4782 | 33    |
| H(13A) | 2536  | 6591  | 5917 | 34    |
| H(13B) | 1351  | 7785  | 5718 | 34    |
| H(21)  | 3746  | 14303 | 6488 | 33    |

**Table S8. Torsion angles [°] for 4b.**

---

|                         |           |
|-------------------------|-----------|
| Ni(1)-N(1)-C(10)-C(11)  | 7.4(9)    |
| Ni(1)-N(1)-C(10)-O(1)   | -173.6(4) |
| Ni(1)-N(2)-C(15)-C(16)  | 163.3(4)  |
| Ni(1)-N(2)-C(15)-C(23)  | -85.7(5)  |
| C(1)-N(1)-C(10)-C(11)   | -178.4(6) |
| C(1)-N(1)-C(10)-O(1)    | 0.6(7)    |
| C(1)-C(2)-C(3)-C(4)     | -0.2(7)   |
| C(1)-C(9)-C(8)-C(7)     | 179.7(5)  |
| C(1)-C(9)-C(4)-C(3)     | -0.5(7)   |
| C(1)-C(9)-C(4)-C(5)     | 180.0(5)  |
| N(1)-C(1)-C(2)-O(1)     | 1.2(6)    |
| N(1)-C(1)-C(2)-C(3)     | 118.9(5)  |
| N(1)-C(1)-C(9)-C(8)     | 67.1(7)   |
| N(1)-C(1)-C(9)-C(4)     | -112.2(5) |
| C(11)-C(14)-O(2)-C(16)  | -173.2(5) |
| C(11)-C(14)-N(2)-Ni(1)  | 9.2(10)   |
| C(11)-C(14)-N(2)-C(15)  | -174.7(6) |
| O(1)-C(2)-C(3)-C(4)     | 112.5(6)  |
| C(2)-C(1)-N(1)-Ni(1)    | 173.3(4)  |
| C(2)-C(1)-N(1)-C(10)    | -1.1(6)   |
| C(2)-C(1)-C(9)-C(8)     | 179.6(6)  |
| C(2)-C(1)-C(9)-C(4)     | 0.3(6)    |
| C(2)-O(1)-C(10)-N(1)    | 0.3(8)    |
| C(2)-O(1)-C(10)-C(11)   | 179.4(5)  |
| C(2)-C(3)-C(4)-C(9)     | 0.4(7)    |
| C(2)-C(3)-C(4)-C(5)     | 179.9(6)  |
| C(10)-C(11)-C(14)-O(2)  | 174.3(5)  |
| C(10)-C(11)-C(14)-N(2)  | -7.7(10)  |
| C(10)-C(11)-C(12)-C(13) | 107.3(6)  |
| C(10)-C(11)-C(13)-C(12) | -104.0(6) |
| C(10)-O(1)-C(2)-C(1)    | -1.0(6)   |
| C(10)-O(1)-C(2)-C(3)    | -116.6(5) |
| C(14)-C(11)-C(10)-N(1)  | -1.3(9)   |
| C(14)-C(11)-C(10)-O(1)  | 179.8(5)  |
| C(14)-C(11)-C(12)-C(13) | -103.0(7) |
| C(14)-C(11)-C(13)-C(12) | 109.8(6)  |
| C(14)-O(2)-C(16)-C(15)  | -15.5(6)  |
| C(14)-O(2)-C(16)-C(17)  | -129.6(6) |

|                         |           |
|-------------------------|-----------|
| C(14)-N(2)-C(15)-C(16)  | -12.9(7)  |
| C(14)-N(2)-C(15)-C(23)  | 98.1(6)   |
| O(2)-C(14)-N(2)-Ni(1)   | -172.8(4) |
| O(2)-C(14)-N(2)-C(15)   | 3.3(8)    |
| O(2)-C(16)-C(15)-N(2)   | 16.6(6)   |
| O(2)-C(16)-C(15)-C(23)  | -99.8(5)  |
| O(2)-C(16)-C(17)-C(18)  | 93.8(6)   |
| N(2)-C(14)-O(2)-C(16)   | 8.5(8)    |
| C(23)-C(18)-C(17)-C(16) | 10.7(7)   |
| C(23)-C(22)-C(21)-C(20) | -0.7(9)   |
| C(9)-C(1)-N(1)-Ni(1)    | -74.0(5)  |
| C(9)-C(1)-N(1)-C(10)    | 111.7(5)  |
| C(9)-C(1)-C(2)-O(1)     | -117.7(5) |
| C(9)-C(1)-C(2)-C(3)     | -0.1(6)   |
| C(9)-C(8)-C(7)-C(6)     | -0.9(9)   |
| C(9)-C(4)-C(5)-C(6)     | 1.6(9)    |
| C(19)-C(18)-C(17)-C(16) | -169.1(6) |
| C(19)-C(20)-C(21)-C(22) | 1.1(10)   |
| C(18)-C(23)-C(15)-N(2)  | -120.8(5) |
| C(18)-C(23)-C(15)-C(16) | -10.4(6)  |
| C(18)-C(23)-C(22)-C(21) | 0.0(9)    |
| C(18)-C(19)-C(20)-C(21) | -0.9(10)  |
| C(8)-C(9)-C(4)-C(3)     | -179.8(6) |
| C(8)-C(9)-C(4)-C(5)     | 0.6(9)    |
| C(20)-C(19)-C(18)-C(23) | 0.2(9)    |
| C(20)-C(19)-C(18)-C(17) | 180.0(6)  |
| C(15)-C(16)-C(17)-C(18) | -16.8(6)  |
| C(15)-C(23)-C(18)-C(19) | 179.7(5)  |
| C(15)-C(23)-C(18)-C(17) | -0.1(7)   |
| C(15)-C(23)-C(22)-C(21) | -179.4(6) |
| C(12)-C(11)-C(10)-N(1)  | 149.2(7)  |
| C(12)-C(11)-C(10)-O(1)  | -29.8(8)  |
| C(12)-C(11)-C(14)-O(2)  | 25.0(9)   |
| C(12)-C(11)-C(14)-N(2)  | -156.9(7) |
| C(3)-C(4)-C(5)-C(6)     | -177.8(6) |
| C(7)-C(6)-C(5)-C(4)     | -3.6(9)   |
| C(22)-C(23)-C(18)-C(19) | 0.2(8)    |
| C(22)-C(23)-C(18)-C(17) | -179.6(5) |
| C(22)-C(23)-C(15)-N(2)  | 58.7(8)   |
| C(22)-C(23)-C(15)-C(16) | 169.0(5)  |

|                         |           |
|-------------------------|-----------|
| C(4)-C(9)-C(8)-C(7)     | -1.0(9)   |
| C(5)-C(6)-C(7)-C(8)     | 3.2(9)    |
| C(17)-C(16)-C(15)-N(2)  | 133.2(5)  |
| C(17)-C(16)-C(15)-C(23) | 16.9(6)   |
| C(13)-C(11)-C(10)-N(1)  | -147.0(6) |
| C(13)-C(11)-C(10)-O(1)  | 34.0(8)   |
| C(13)-C(11)-C(14)-O(2)  | -39.4(8)  |
| C(13)-C(11)-C(14)-N(2)  | 138.6(7)  |

---



| Parameter              | Value               |
|------------------------|---------------------|
| Title                  | JLH-5-052.1.fid     |
| Origin                 | Bruker BioSpin GmbH |
| Solvent                | CDCl3               |
| Temperature            | 295.0               |
| Pulse Sequence         | zg30                |
| Number of Scans        | 16                  |
| Receiver Gain          | 112.8               |
| Relaxation Delay       | 1.0000              |
| Pulse Width            | 11.7000             |
| Acquisition Time       | 4.0894              |
| Acquisition Date       | 2016-08-19T15:53:20 |
| Spectrometer Frequency | 400.13              |
| Spectral Width         | 8012.8              |
| Lowest Frequency       | -1555.6             |
| Nucleus                | 1H                  |
| Acquired Size          | 32768               |
| Spectral Size          | 65536               |

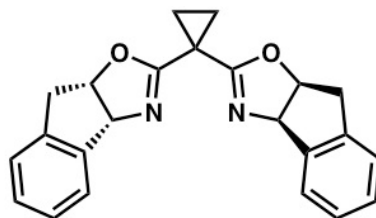

L

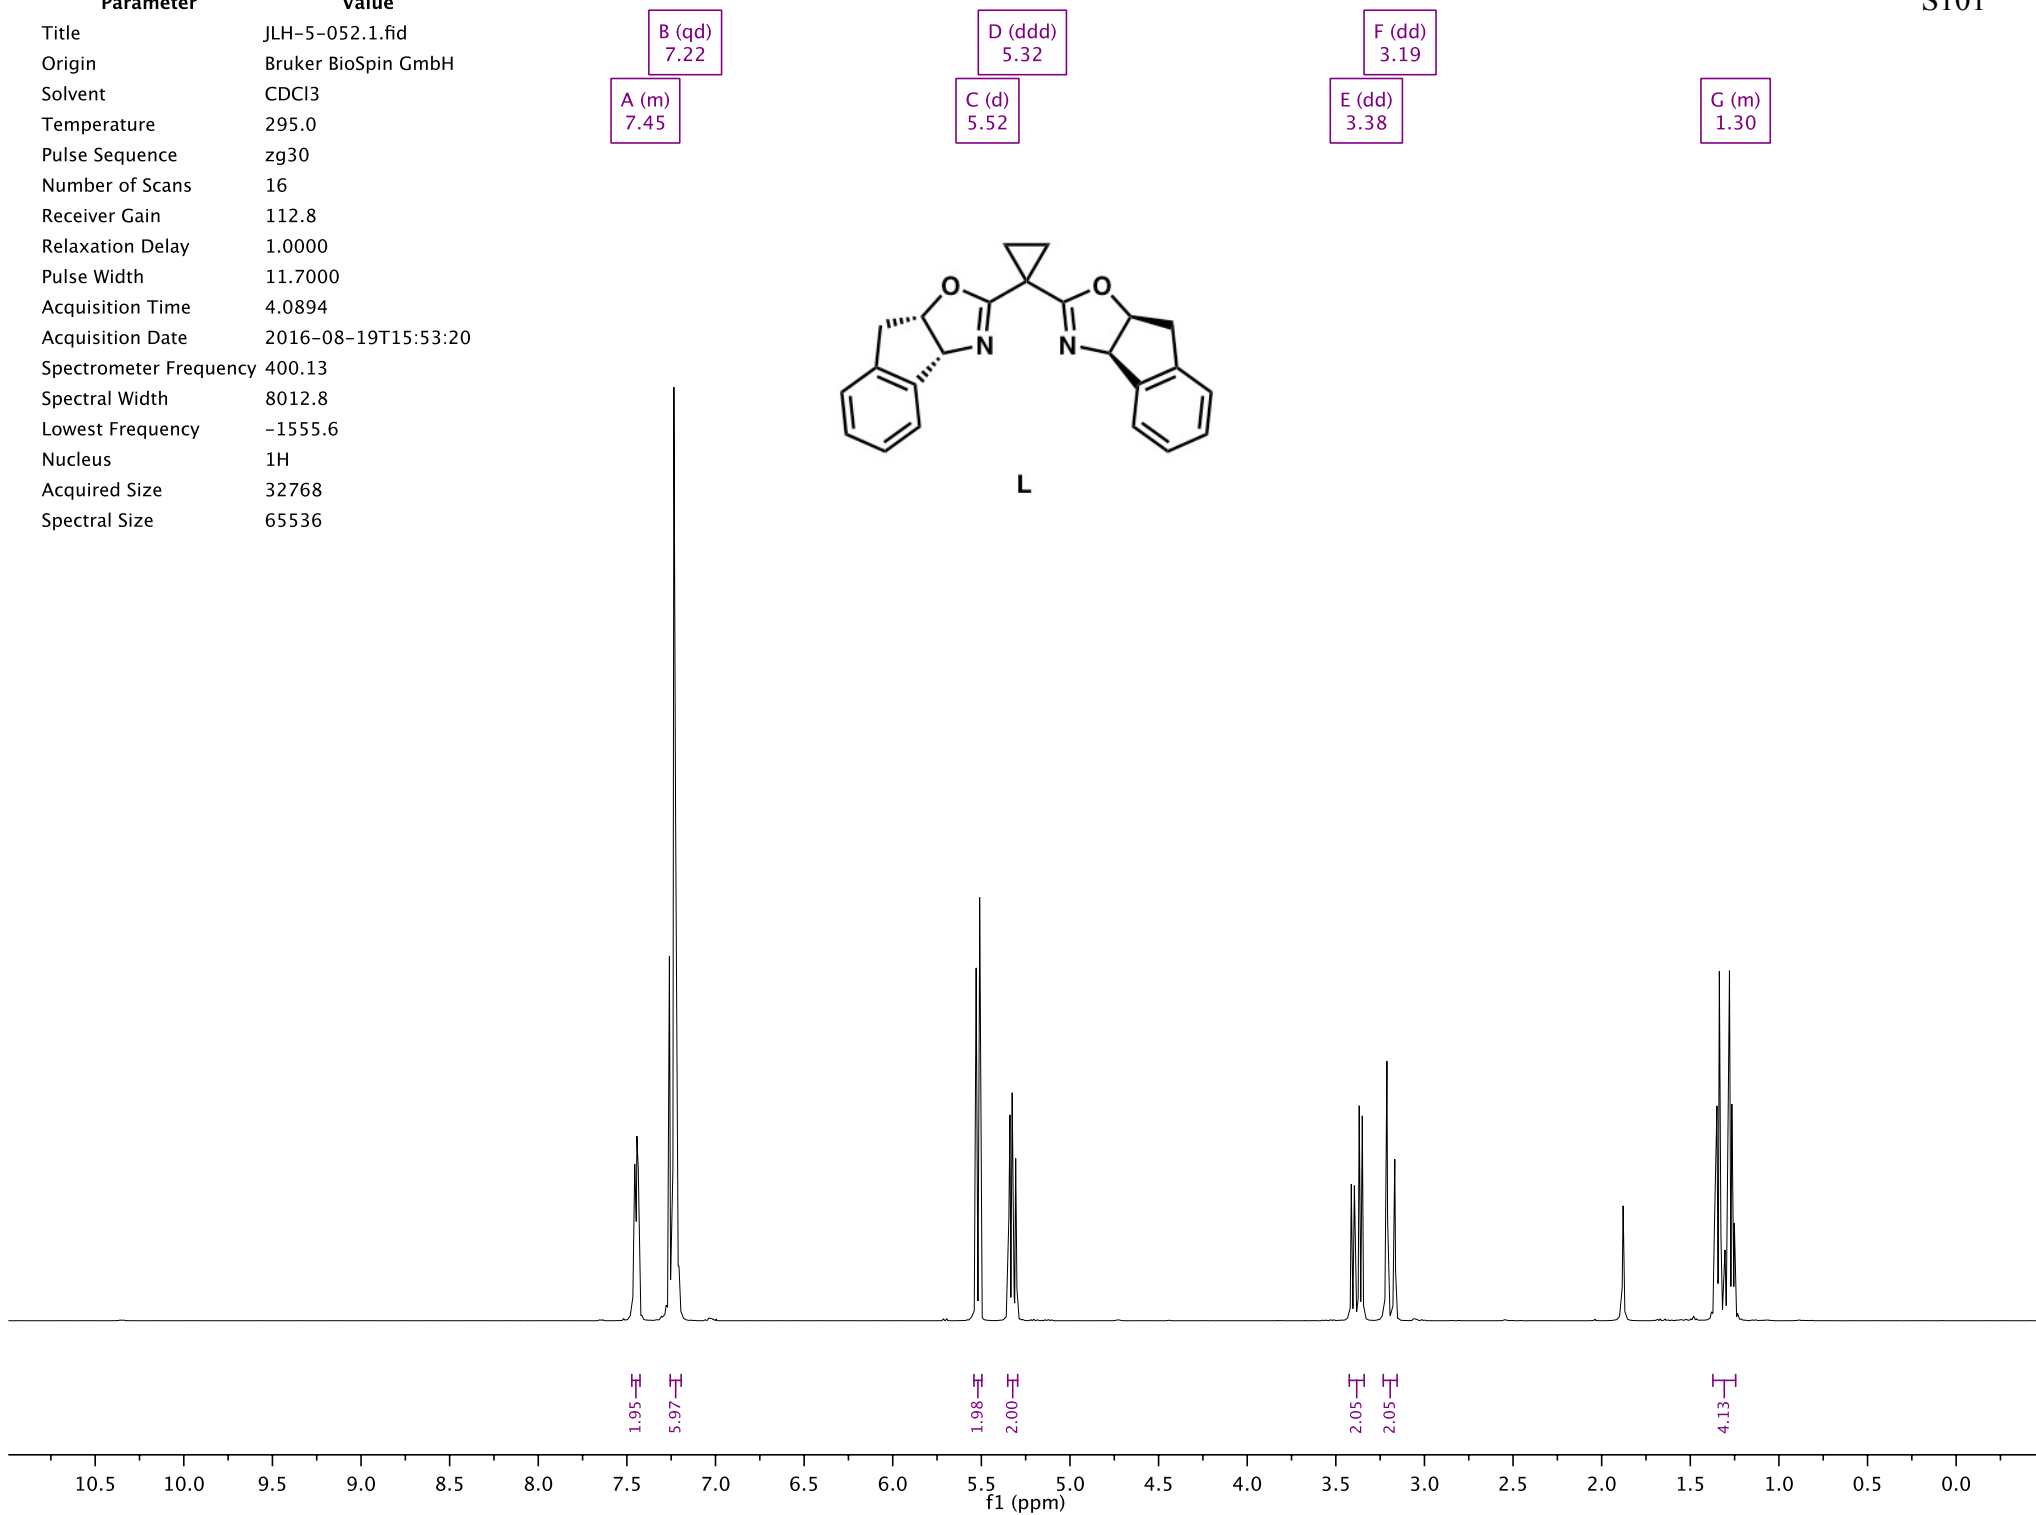

| Parameter              | Value               |
|------------------------|---------------------|
| Title                  | JLH-5-052.2.fid     |
| Origin                 | Bruker BioSpin GmbH |
| Solvent                | CDCl3               |
| Temperature            | 295.0               |
| Pulse Sequence         | zgpg30              |
| Number of Scans        | 128                 |
| Receiver Gain          | 87.8                |
| Relaxation Delay       | 2.0000              |
| Pulse Width            | 10.0000             |
| Acquisition Time       | 1.3631              |
| Acquisition Date       | 2016-08-19T16:01:10 |
| Spectrometer Frequency | 100.62              |
| Spectral Width         | 24038.5             |
| Lowest Frequency       | -1937.2             |
| Nucleus                | <sup>13</sup> C     |
| Acquired Size          | 32768               |
| Spectral Size          | 65536               |

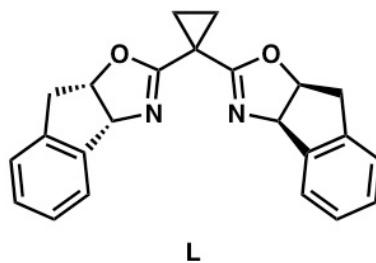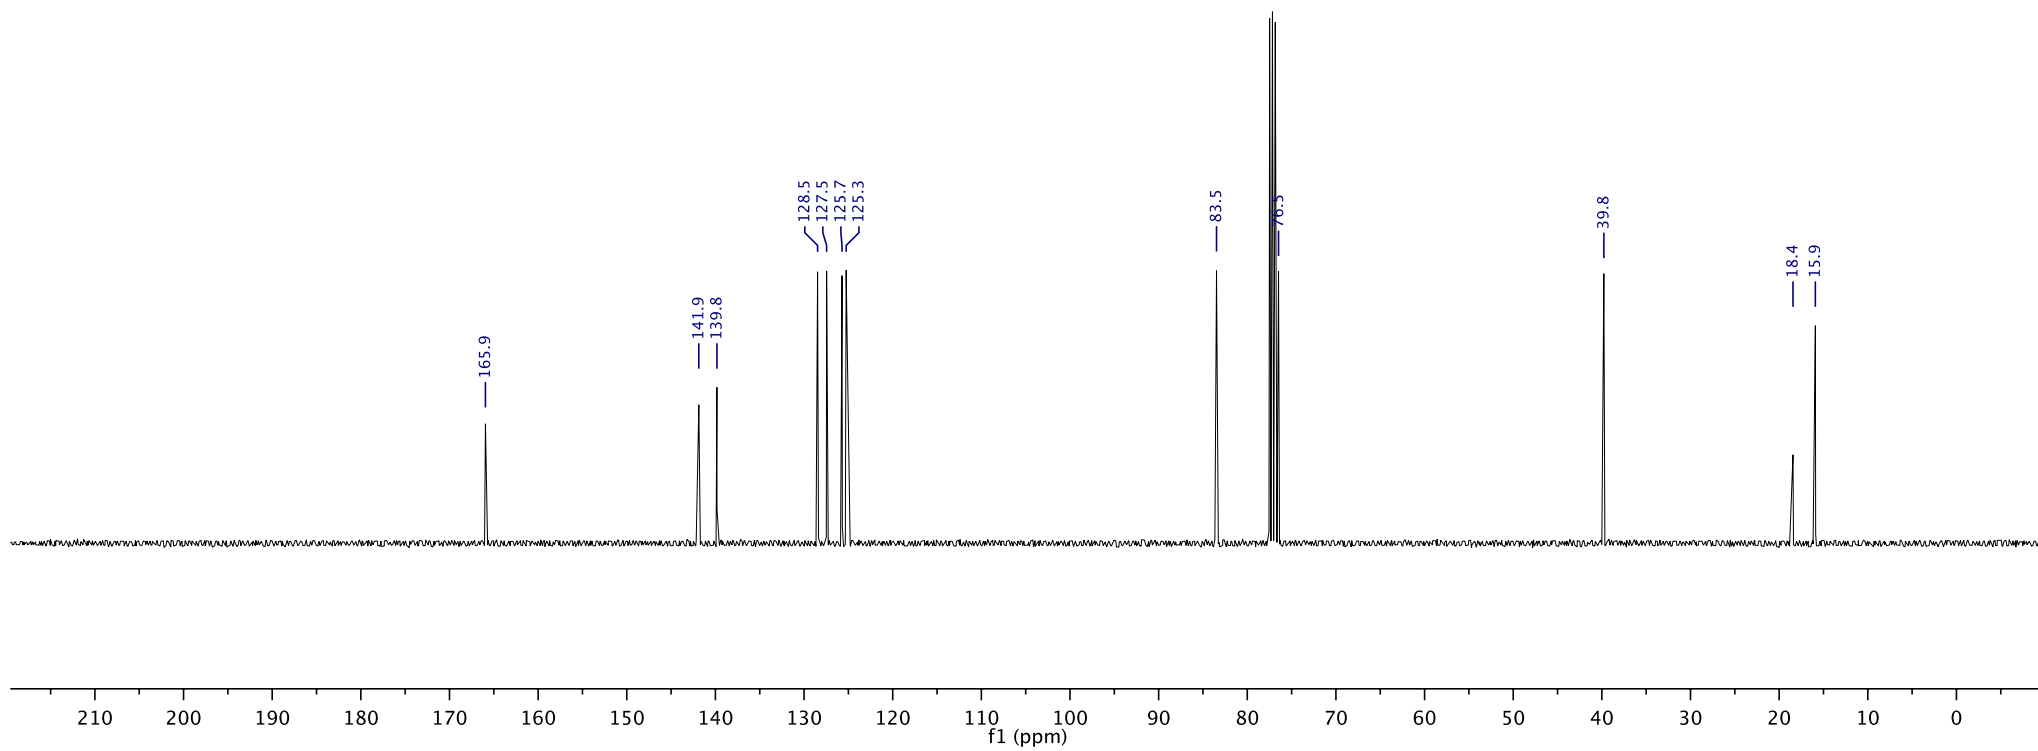

| Parameter              | Value               |
|------------------------|---------------------|
| Title                  | JLH-5-151-recryst   |
| Origin                 | Varian              |
| Solvent                | cdcl3               |
| Temperature            | 25.0                |
| Pulse Sequence         | s2pul               |
| Number of Scans        | 64                  |
| Receiver Gain          | 30                  |
| Relaxation Delay       | 2.0000              |
| Pulse Width            | 4.1500              |
| Acquisition Time       | 1.9923              |
| Acquisition Date       | 2016-08-19T13:13:47 |
| Spectrometer Frequency | 399.81              |
| Spectral Width         | 65789.5             |
| Lowest Frequency       | -13264.8            |
| Nucleus                | <sup>1</sup> H      |
| Acquired Size          | 131072              |
| Spectral Size          | 262144              |

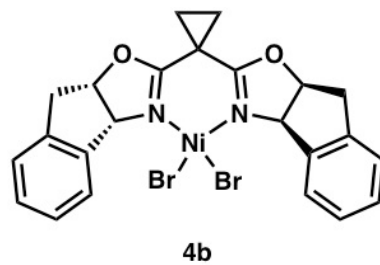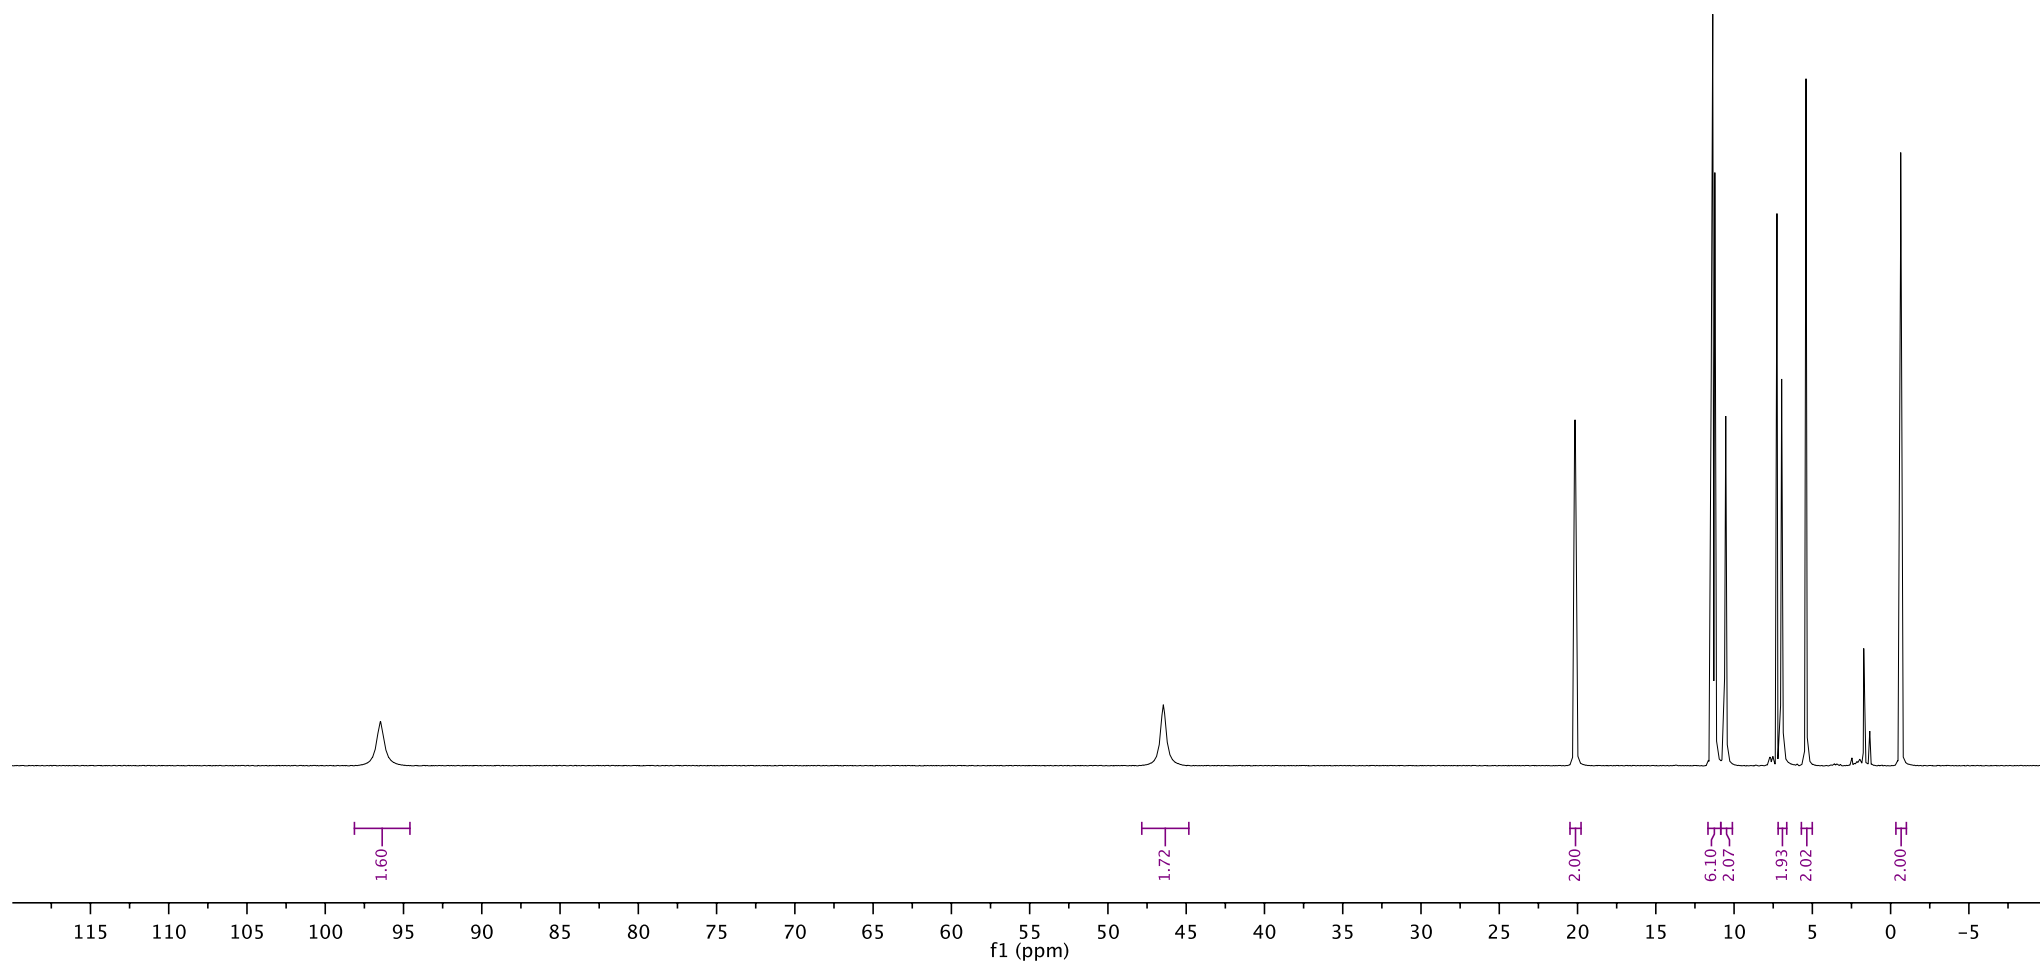

| Parameter              | Value               |
|------------------------|---------------------|
| Title                  | JLH-5-150           |
| Origin                 | Varian              |
| Solvent                | "cdcl3"             |
| Temperature            | 25.0                |
| Pulse Sequence         | s2pul               |
| Number of Scans        | 8                   |
| Receiver Gain          | 0                   |
| Relaxation Delay       | 1.0000              |
| Pulse Width            | 5.1000              |
| Acquisition Time       | 2.4999              |
| Acquisition Date       | 2016-08-18T01:32:15 |
| Spectrometer Frequency | 300.09              |
| Spectral Width         | 4796.2              |
| Lowest Frequency       | -597.5              |
| Nucleus                | <sup>1</sup> H      |
| Acquired Size          | 11990               |
| Spectral Size          | 65536               |

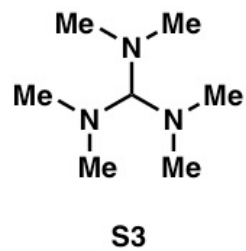A (s)  
3.02B (s)  
2.29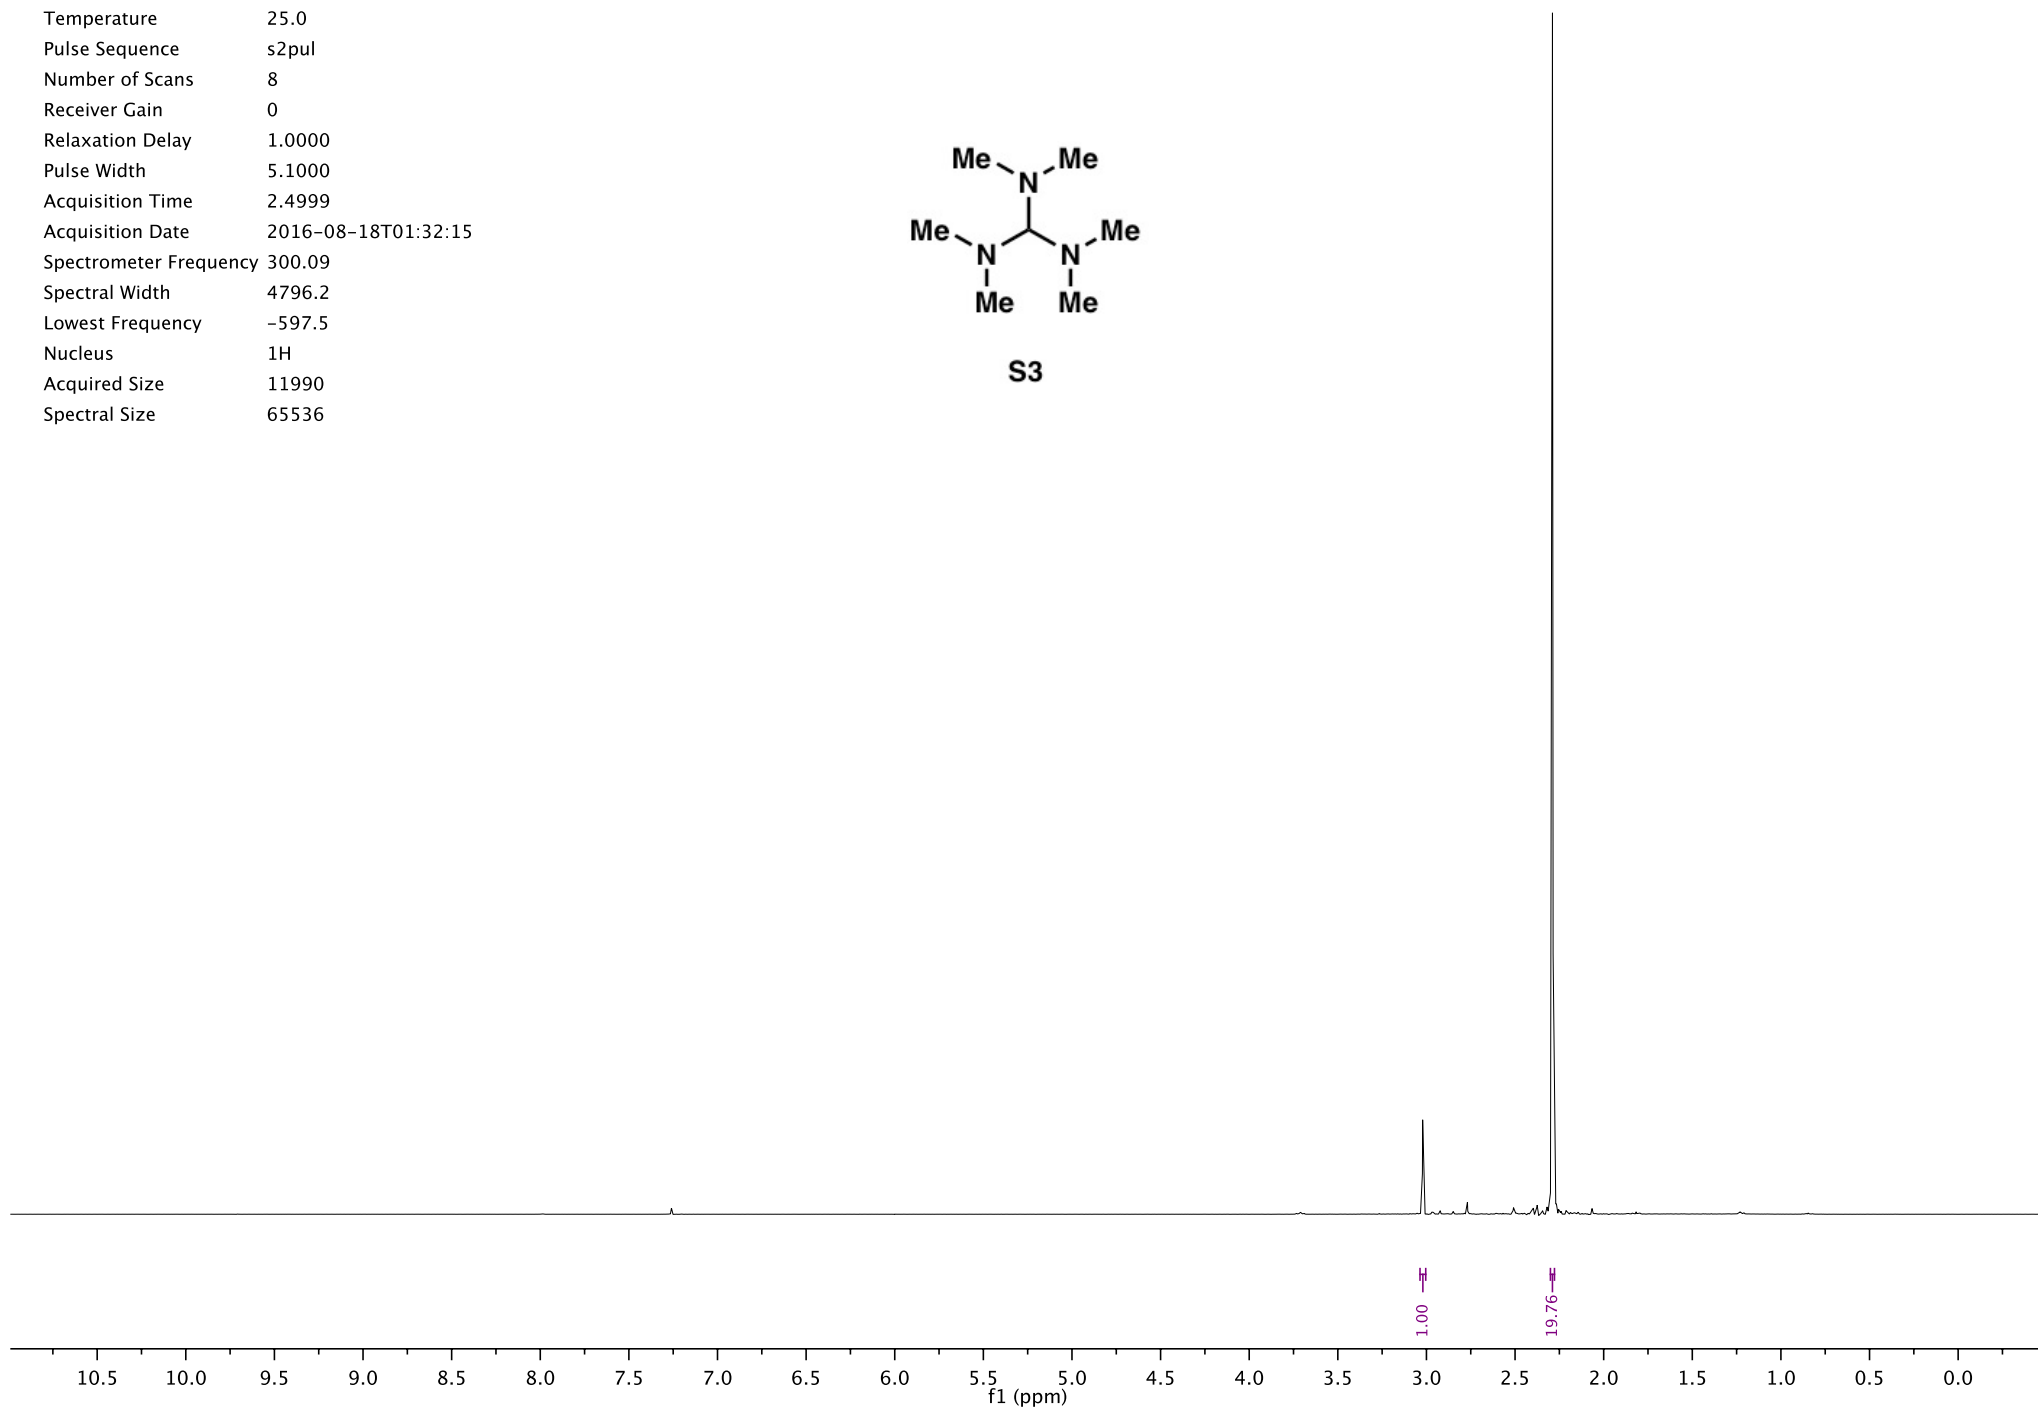

| Parameter              | Value               |
|------------------------|---------------------|
| Title                  | JLH-5-150.2.fid     |
| Origin                 | Bruker BioSpin GmbH |
| Solvent                | CDCl3               |
| Temperature            | 294.9               |
| Pulse Sequence         | zgpg30              |
| Number of Scans        | 128                 |
| Receiver Gain          | 72.0                |
| Relaxation Delay       | 2.0000              |
| Pulse Width            | 10.0000             |
| Acquisition Time       | 1.3631              |
| Acquisition Date       | 2016-08-19T15:48:48 |
| Spectrometer Frequency | 100.62              |
| Spectral Width         | 24038.5             |
| Lowest Frequency       | -1958.0             |
| Nucleus                | <sup>13</sup> C     |
| Acquired Size          | 32768               |
| Spectral Size          | 65536               |

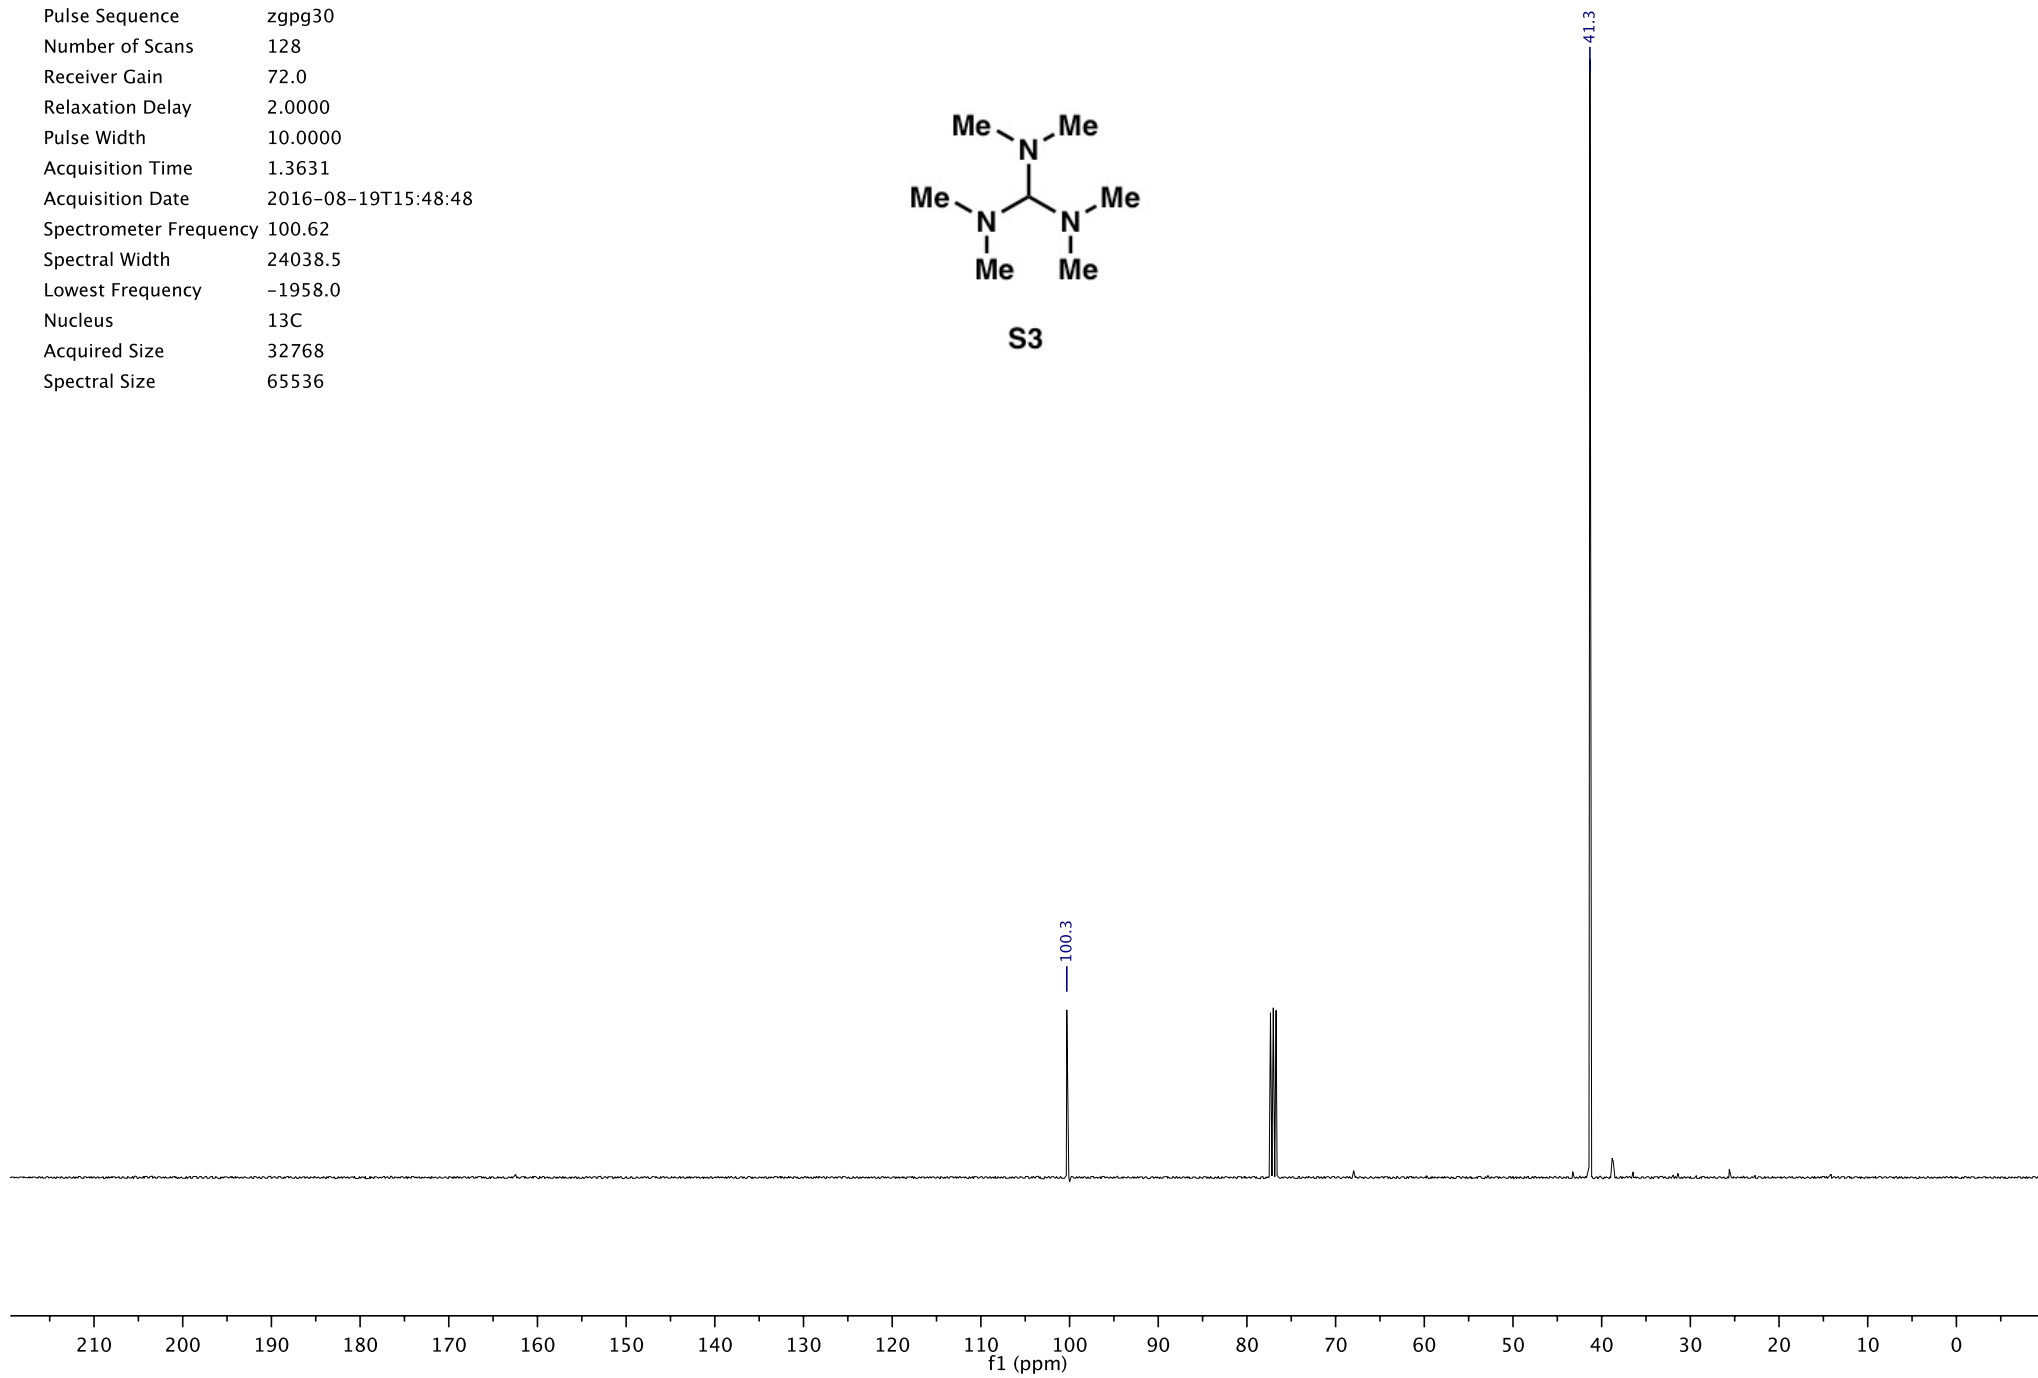

| Parameter              | Value               |
|------------------------|---------------------|
| Title                  | JLH-5-168-D2F3      |
| Origin                 | Varian              |
| Solvent                | d8-toluene          |
| Temperature            | 24.0                |
| Pulse Sequence         | s2pul               |
| Number of Scans        | 1                   |
| Receiver Gain          | 20                  |
| Relaxation Delay       | 1.0000              |
| Pulse Width            | 4.1500              |
| Acquisition Time       | 20.4472             |
| Acquisition Date       | 2016-08-30T22:06:00 |
| Spectrometer Frequency | 399.80              |
| Spectral Width         | 6410.3              |
| Lowest Frequency       | -808.0              |
| Nucleus                | $^1\text{H}$        |
| Acquired Size          | 131072              |
| Spectral Size          | 262144              |

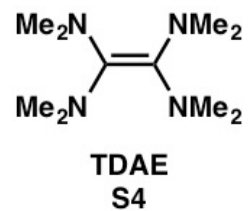A (s)  
2.5724.00  
-H10.5 10.0 9.5 9.0 8.5 8.0 7.5 7.0 6.5 6.0 5.5 5.0 4.5 4.0 3.5 3.0 2.5 2.0 1.5 1.0 0.5 0.0  
f1 (ppm)

| Parameter              | Value                 |
|------------------------|-----------------------|
| Title                  | JLH-5-168-D2F3-carbon |
| Origin                 | Varian                |
| Solvent                | d8-toluene            |
| Temperature            | 24.0                  |
| Pulse Sequence         | s2pul                 |
| Number of Scans        | 36                    |
| Receiver Gain          | 30                    |
| Relaxation Delay       | 1.0000                |
| Pulse Width            | 3.5125                |
| Acquisition Time       | 1.3107                |
| Acquisition Date       | 2016-08-30T22:15:08   |
| Spectrometer Frequency | 100.54                |
| Spectral Width         | 25000.0               |
| Lowest Frequency       | -1402.1               |
| Nucleus                | <sup>13</sup> C       |
| Acquired Size          | 32768                 |
| Spectral Size          | 65536                 |

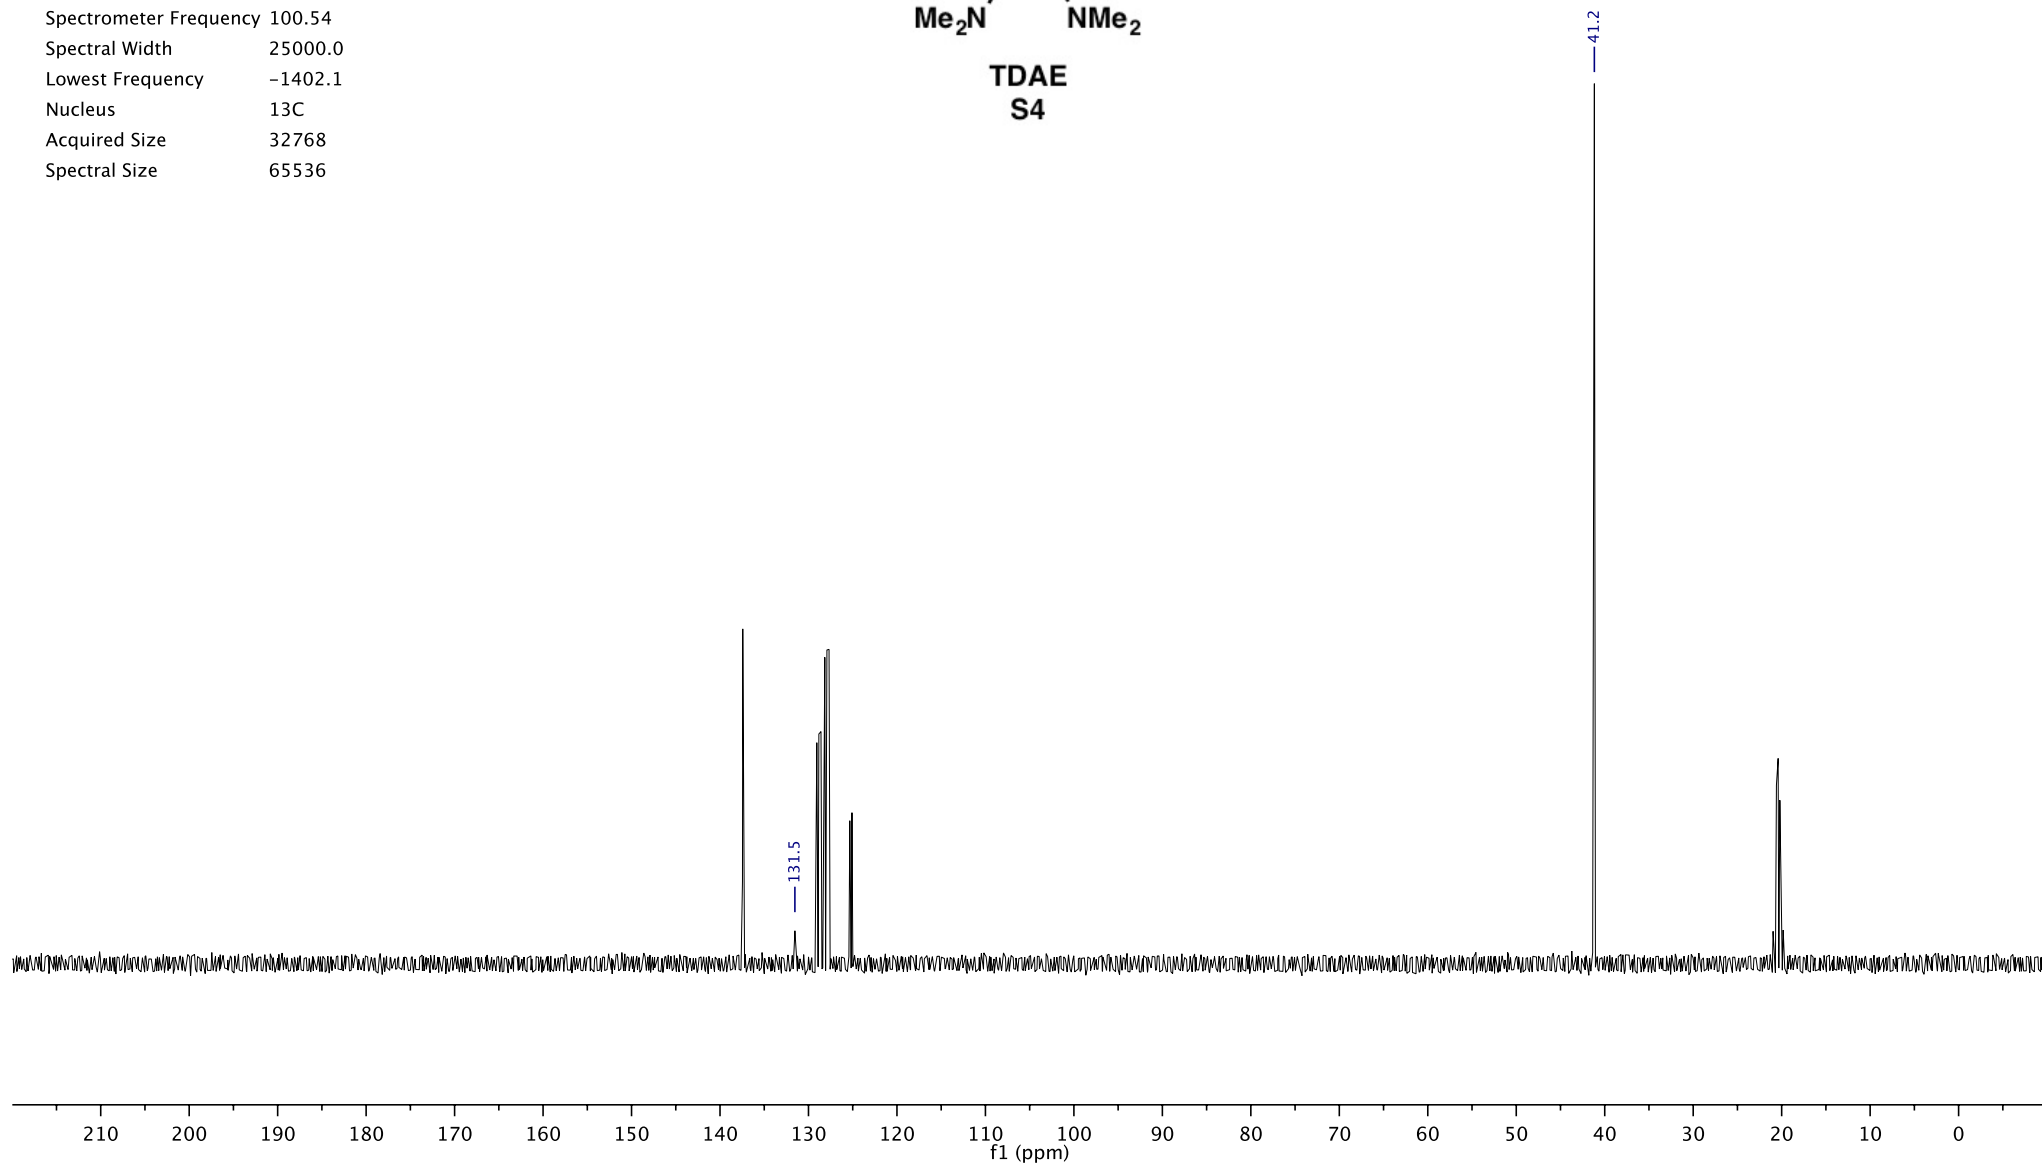

| Parameter              | Value               |
|------------------------|---------------------|
| Title                  | NAO-01-071-A.1.fid  |
| Origin                 | Bruker BioSpin GmbH |
| Solvent                | CDCl3               |
| Temperature            | 294.9               |
| Pulse Sequence         | zg30                |
| Number of Scans        | 16                  |
| Receiver Gain          | 55.5                |
| Relaxation Delay       | 1.0000              |
| Pulse Width            | 11.7000             |
| Acquisition Time       | 4.0894              |
| Acquisition Date       | 2016-08-17T23:57:55 |
| Spectrometer Frequency | 400.13              |
| Spectral Width         | 8012.8              |
| Lowest Frequency       | -1555.6             |
| Nucleus                | <sup>1</sup> H      |
| Acquired Size          | 32768               |
| Spectral Size          | 65536               |

|        |       |
|--------|-------|
| B (dd) | D (m) |
| 7.76   | 7.33  |
| A (dd) | C (m) |
| 7.85   | 7.40  |

E (q)  
4.13F (d)  
1.68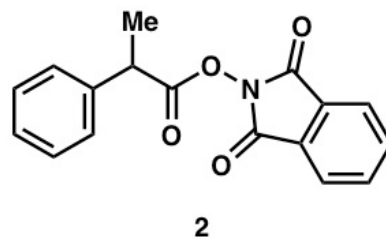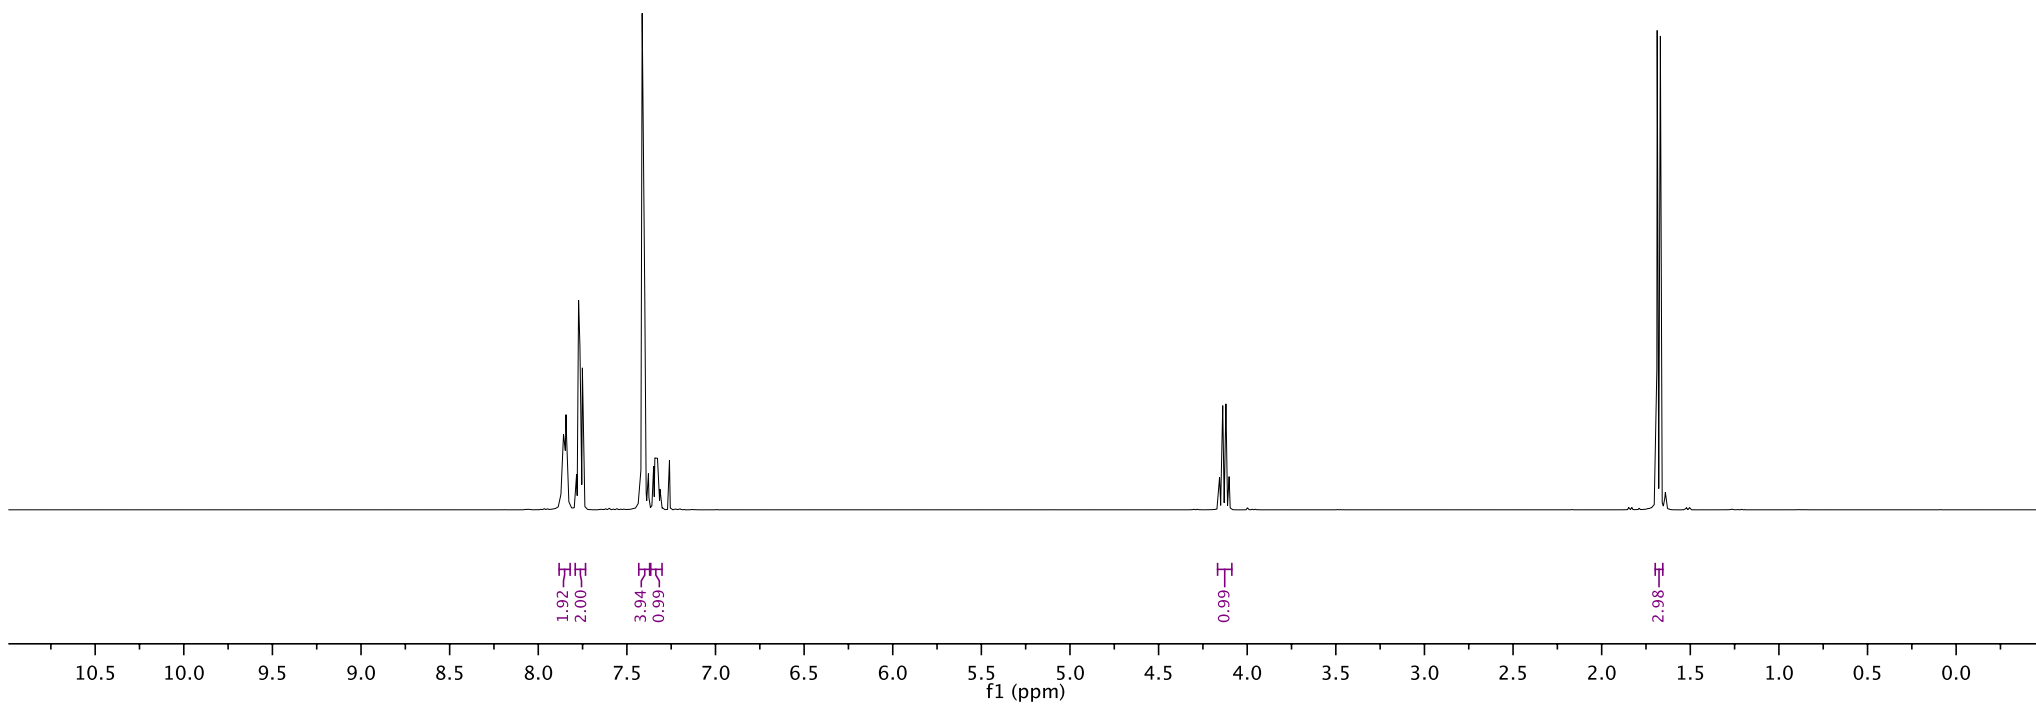



| Parameter              | Value               |
|------------------------|---------------------|
| Title                  | NAO-01-071-A.2.fid  |
| Origin                 | Bruker BioSpin GmbH |
| Solvent                | CDCl3               |
| Temperature            | 295.0               |
| Pulse Sequence         | zgpg30              |
| Number of Scans        | 128                 |
| Receiver Gain          | 64.2                |
| Relaxation Delay       | 2.0000              |
| Pulse Width            | 10.0000             |
| Acquisition Time       | 1.3631              |
| Acquisition Date       | 2016-08-18T00:05:45 |
| Spectrometer Frequency | 100.62              |
| Spectral Width         | 24038.5             |
| Lowest Frequency       | -1942.9             |
| Nucleus                | <sup>13</sup> C     |
| Acquired Size          | 32768               |
| Spectral Size          | 65536               |

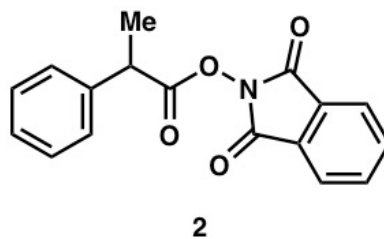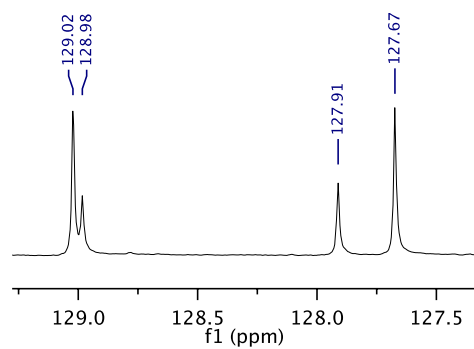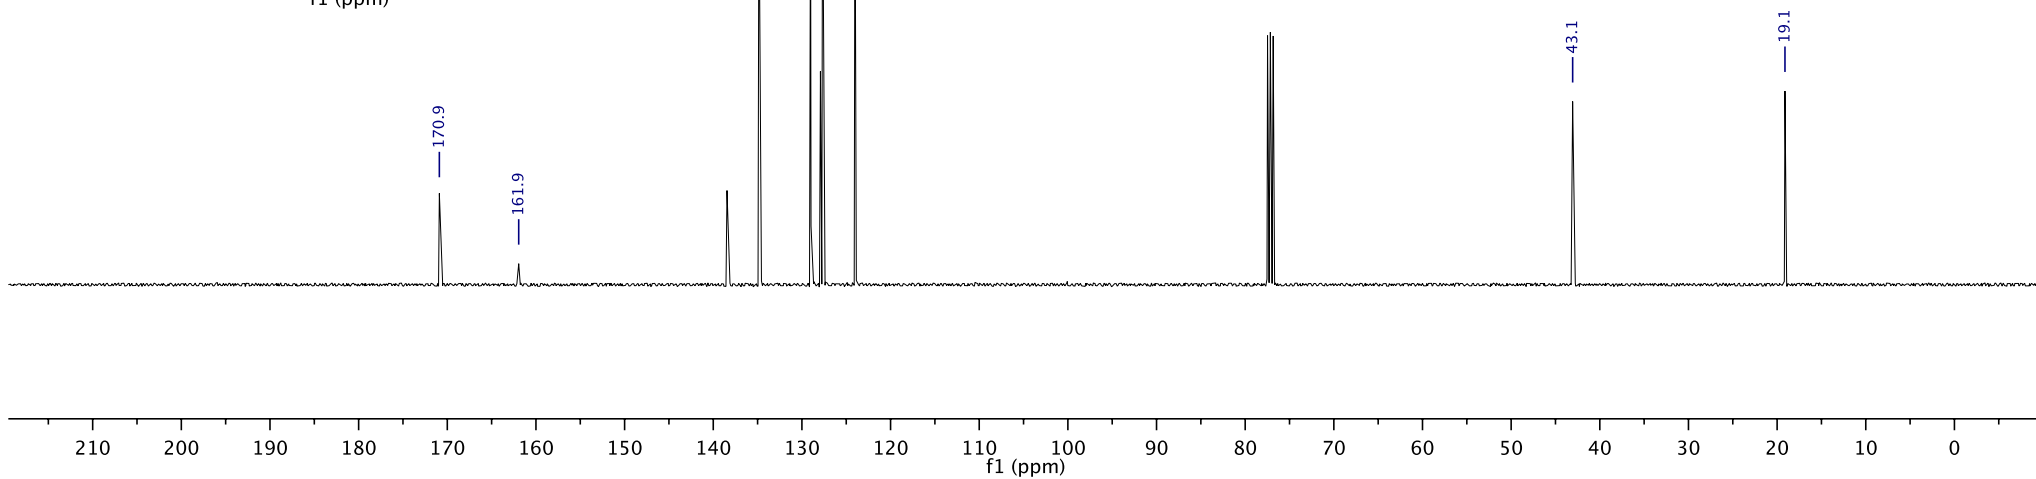

| Parameter              | Value               |
|------------------------|---------------------|
| Title                  | NAO-01-174-A.1.fid  |
| Origin                 | Bruker BioSpin GmbH |
| Solvent                | CDCl3               |
| Temperature            | 295.0               |
| Pulse Sequence         | zg30                |
| Number of Scans        | 16                  |
| Receiver Gain          | 78.7                |
| Relaxation Delay       | 1.0000              |
| Pulse Width            | 11.7000             |
| Acquisition Time       | 4.0894              |
| Acquisition Date       | 2016-08-18T00:56:19 |
| Spectrometer Frequency | 400.13              |
| Spectral Width         | 8012.8              |
| Lowest Frequency       | -1555.6             |
| Nucleus                | <sup>1</sup> H      |
| Acquired Size          | 32768               |
| Spectral Size          | 65536               |

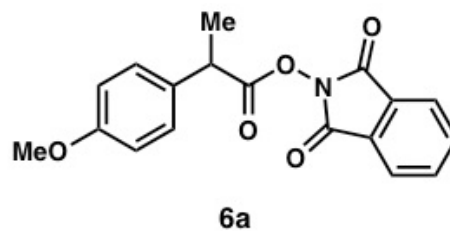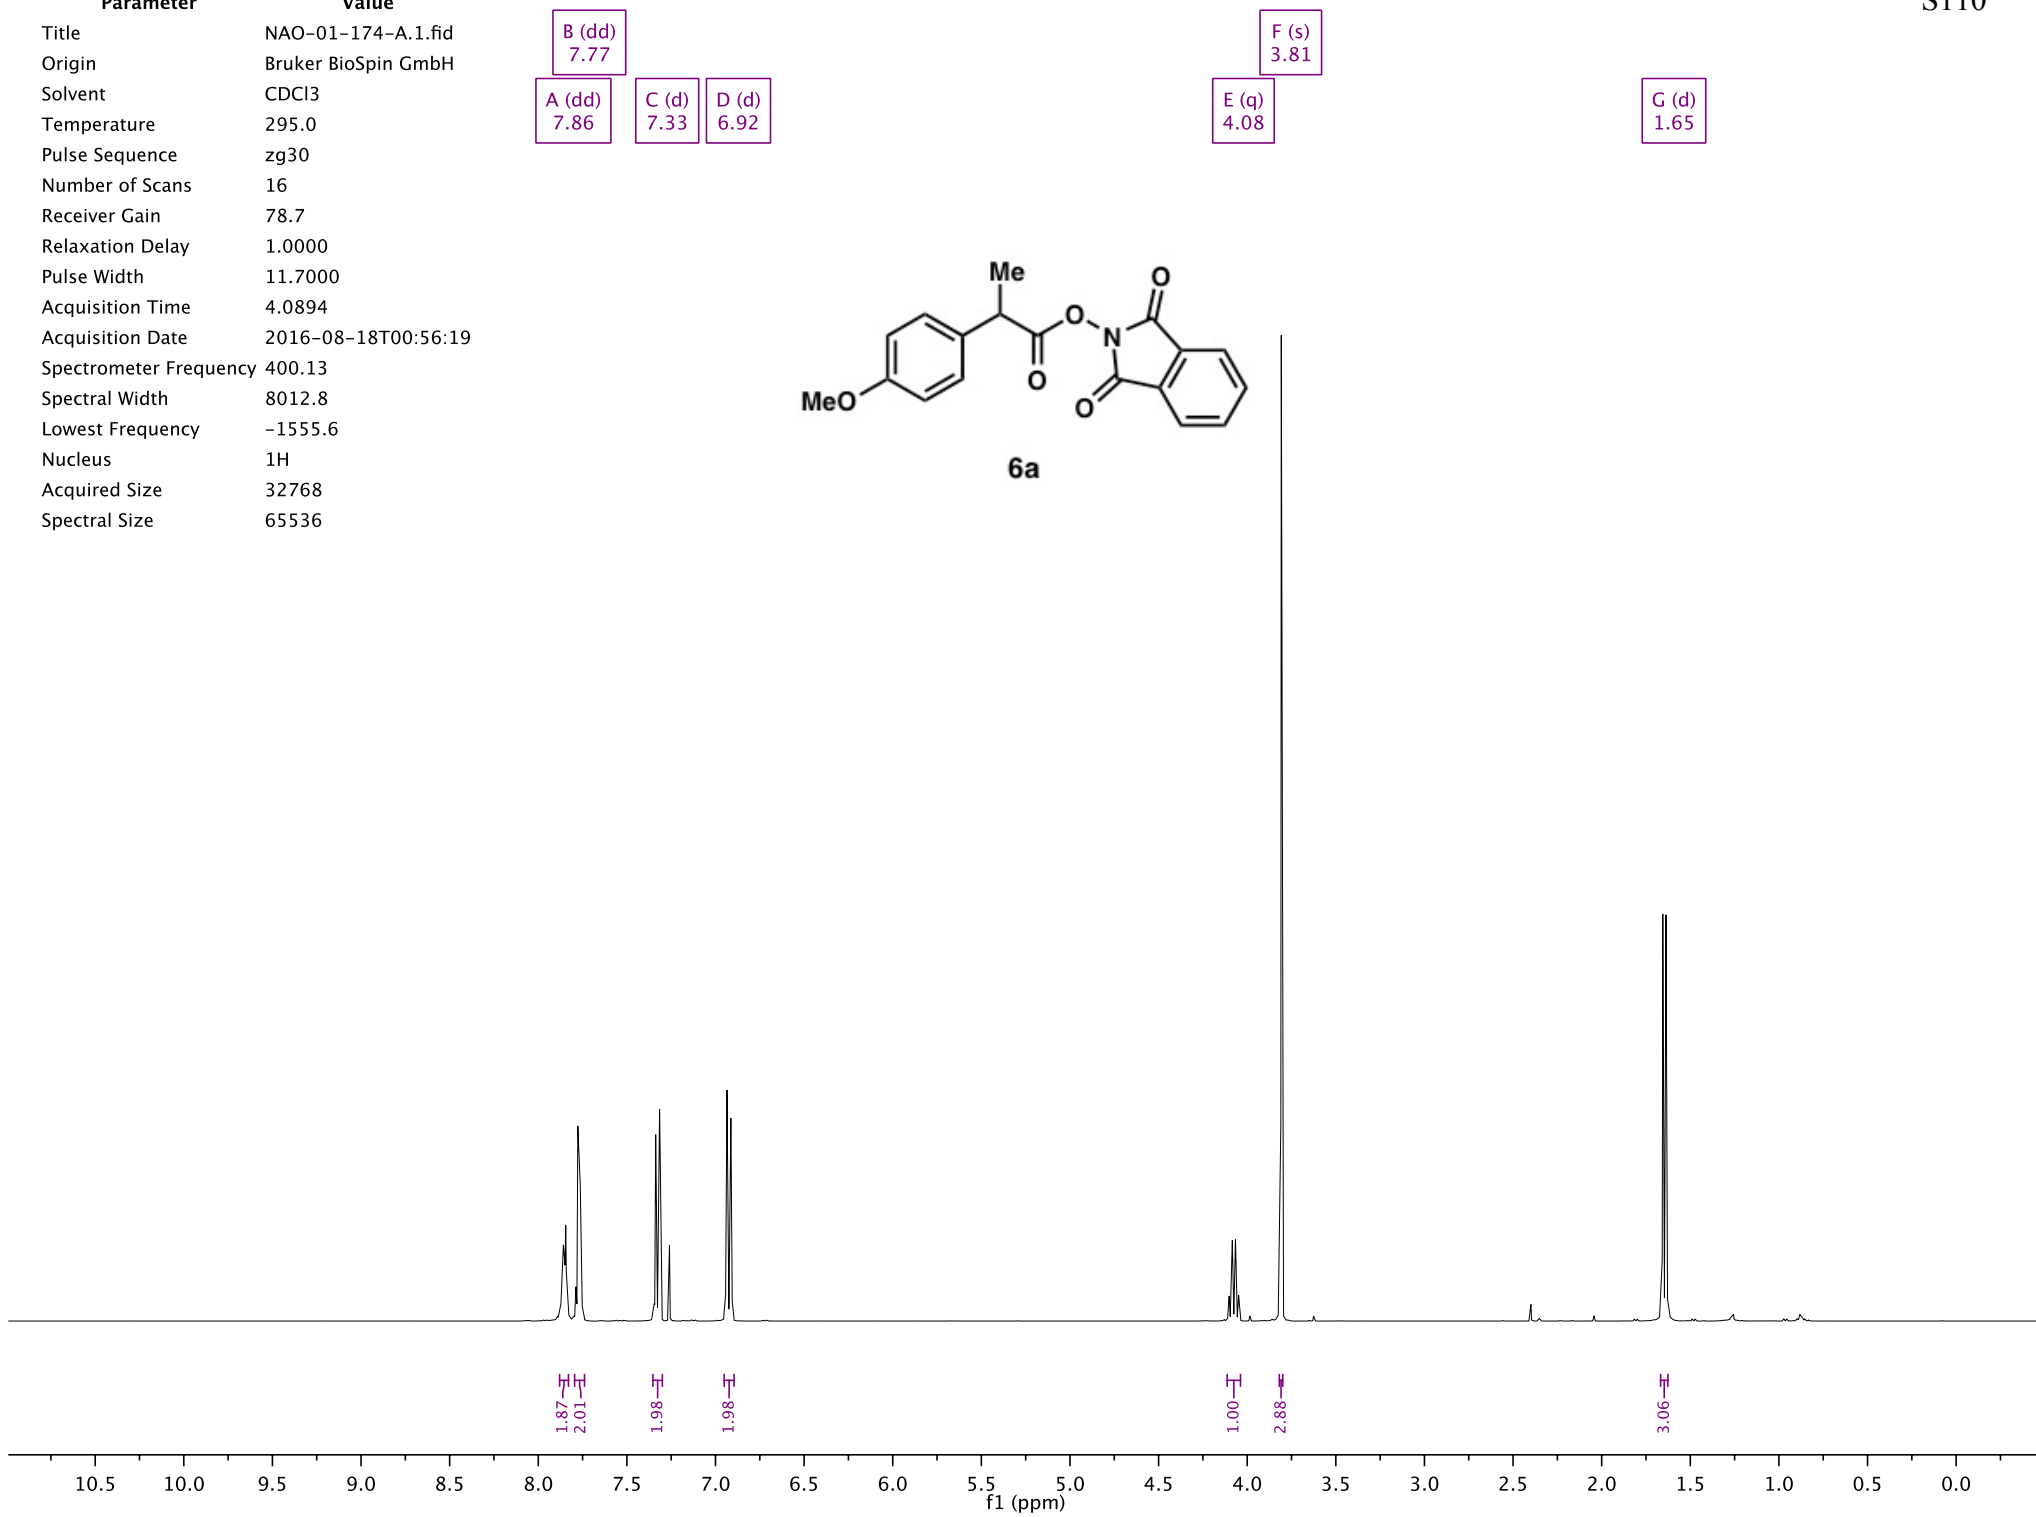

| Parameter              | Value               |
|------------------------|---------------------|
| Title                  | NAO-01-174-A.2.fid  |
| Origin                 | Bruker BioSpin GmbH |
| Solvent                | CDCl3               |
| Temperature            | 294.9               |
| Pulse Sequence         | zgpg30              |
| Number of Scans        | 128                 |
| Receiver Gain          | 72.0                |
| Relaxation Delay       | 2.0000              |
| Pulse Width            | 10.0000             |
| Acquisition Time       | 1.3631              |
| Acquisition Date       | 2016-08-18T01:04:09 |
| Spectrometer Frequency | 100.62              |
| Spectral Width         | 24038.5             |
| Lowest Frequency       | -1938.0             |
| Nucleus                | 13C                 |
| Acquired Size          | 32768               |
| Spectral Size          | 65536               |

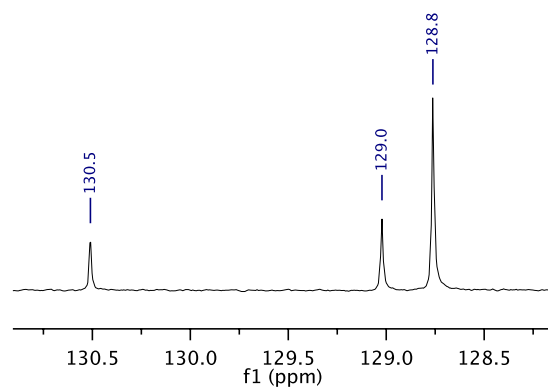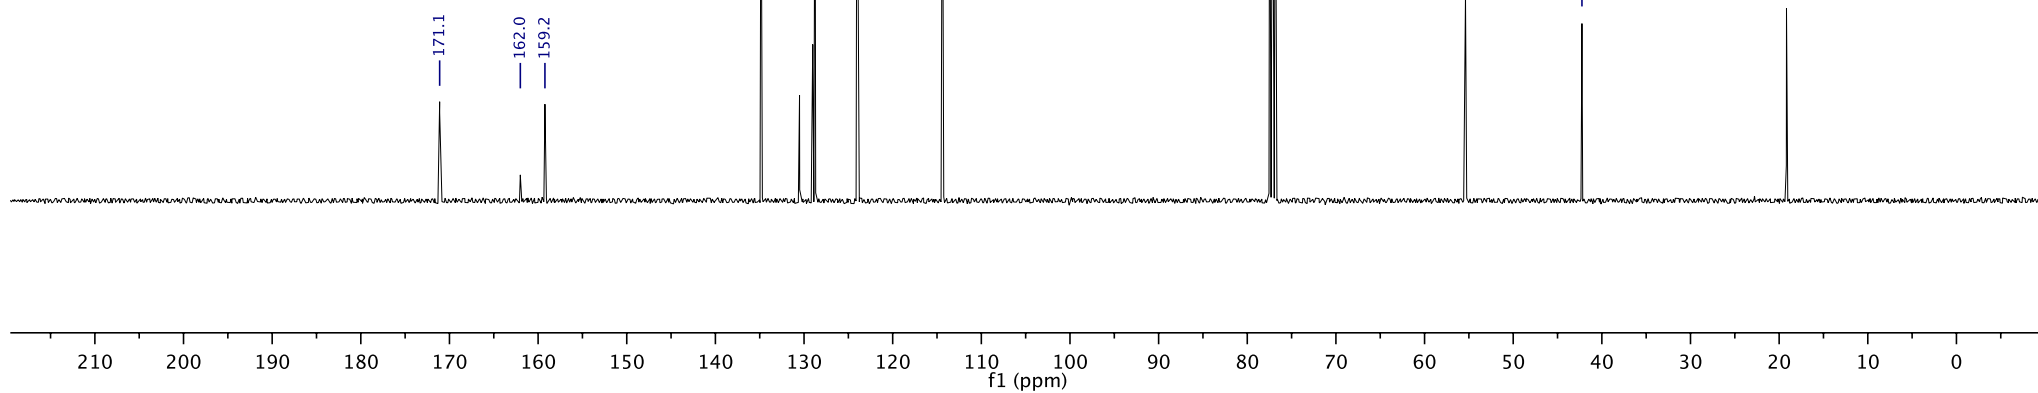

| Parameter              | Value               |
|------------------------|---------------------|
| Title                  | NAO-01-176-A.1.fid  |
| Origin                 | Bruker BioSpin GmbH |
| Solvent                | CDCl3               |
| Temperature            | 295.0               |
| Pulse Sequence         | zg30                |
| Number of Scans        | 16                  |
| Receiver Gain          | 98.9                |
| Relaxation Delay       | 1.0000              |
| Pulse Width            | 11.7000             |
| Acquisition Time       | 4.0894              |
| Acquisition Date       | 2016-08-17T22:00:38 |
| Spectrometer Frequency | 400.13              |
| Spectral Width         | 8012.8              |
| Lowest Frequency       | -1535.6             |
| Nucleus                | <sup>1</sup> H      |
| Acquired Size          | 32768               |
| Spectral Size          | 65536               |

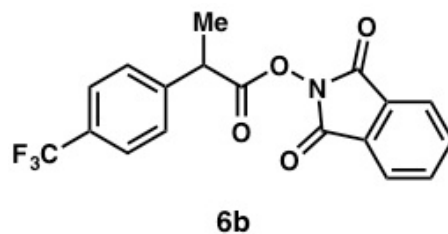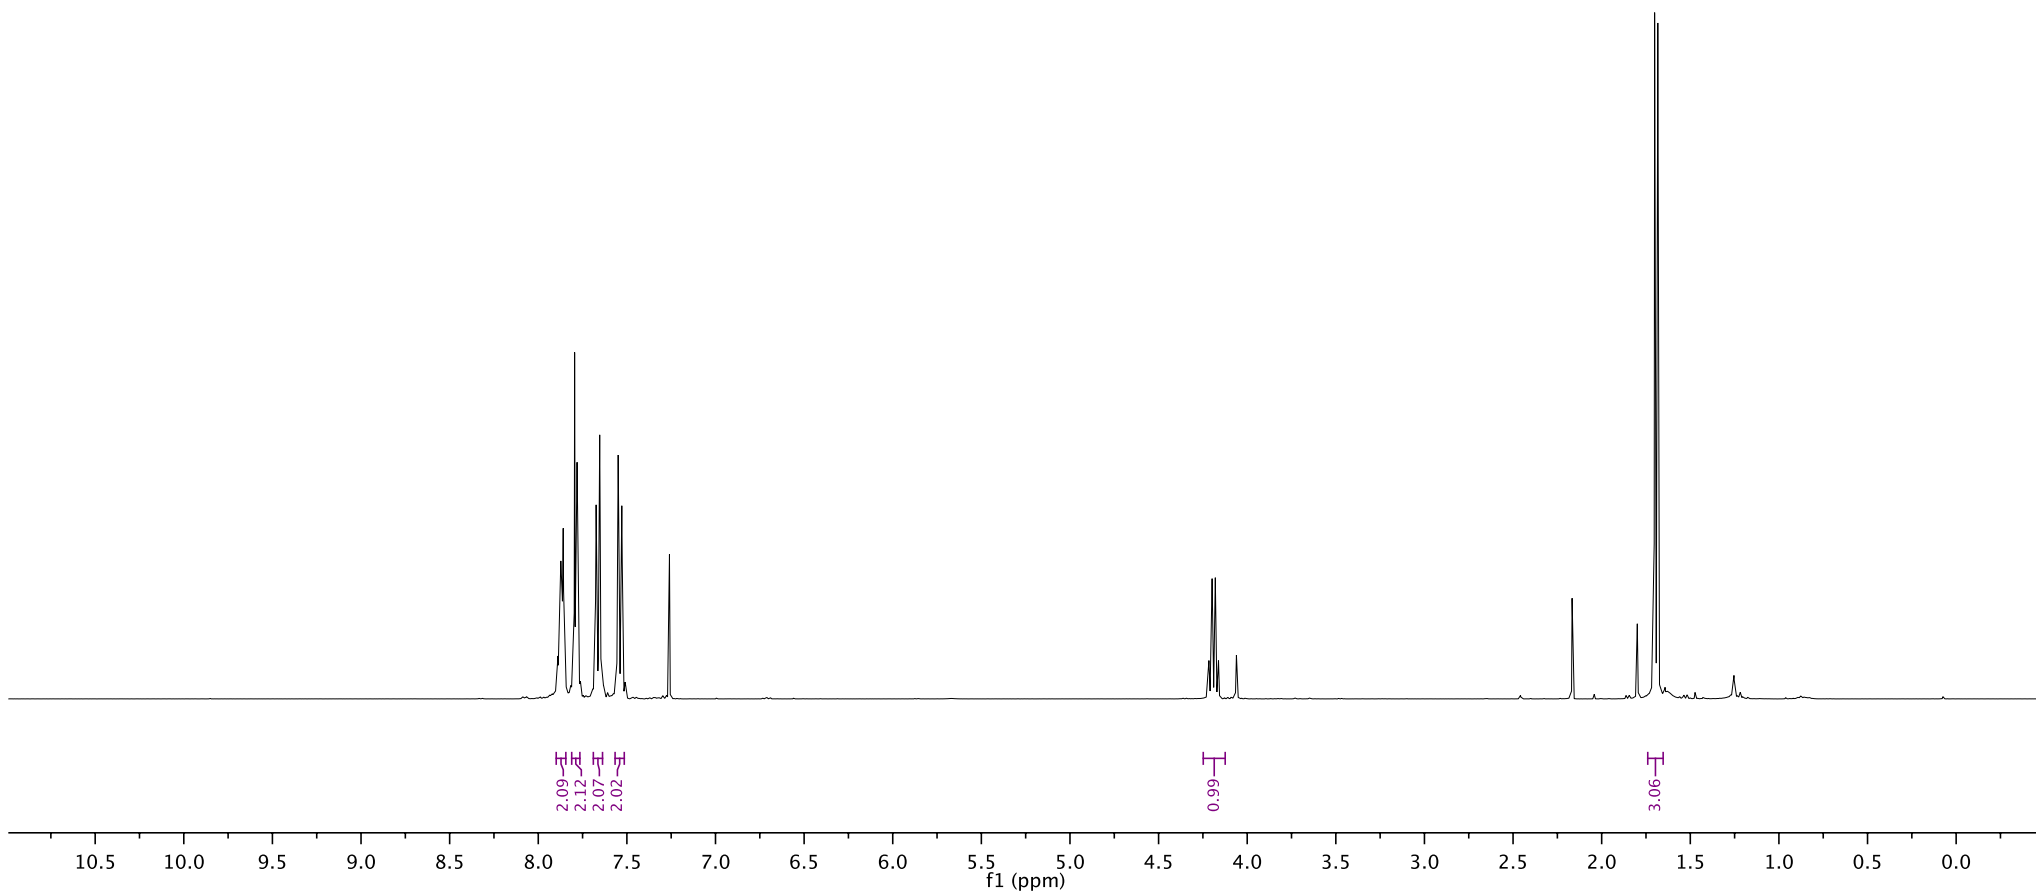

| Parameter              | Value               |
|------------------------|---------------------|
| Title                  | NAO-01-176-A.2.fid  |
| Origin                 | Bruker BioSpin GmbH |
| Solvent                | CDCl3               |
| Temperature            | 294.9               |
| Pulse Sequence         | zgpg30              |
| Number of Scans        | 128                 |
| Receiver Gain          | 64.2                |
| Relaxation Delay       | 2.0000              |
| Pulse Width            | 10.0000             |
| Acquisition Time       | 1.3631              |
| Acquisition Date       | 2016-08-17T22:08:28 |
| Spectrometer Frequency | 100.62              |
| Spectral Width         | 24038.5             |
| Lowest Frequency       | -1934.6             |
| Nucleus                | 13C                 |
| Acquired Size          | 32768               |
| Spectral Size          | 65536               |

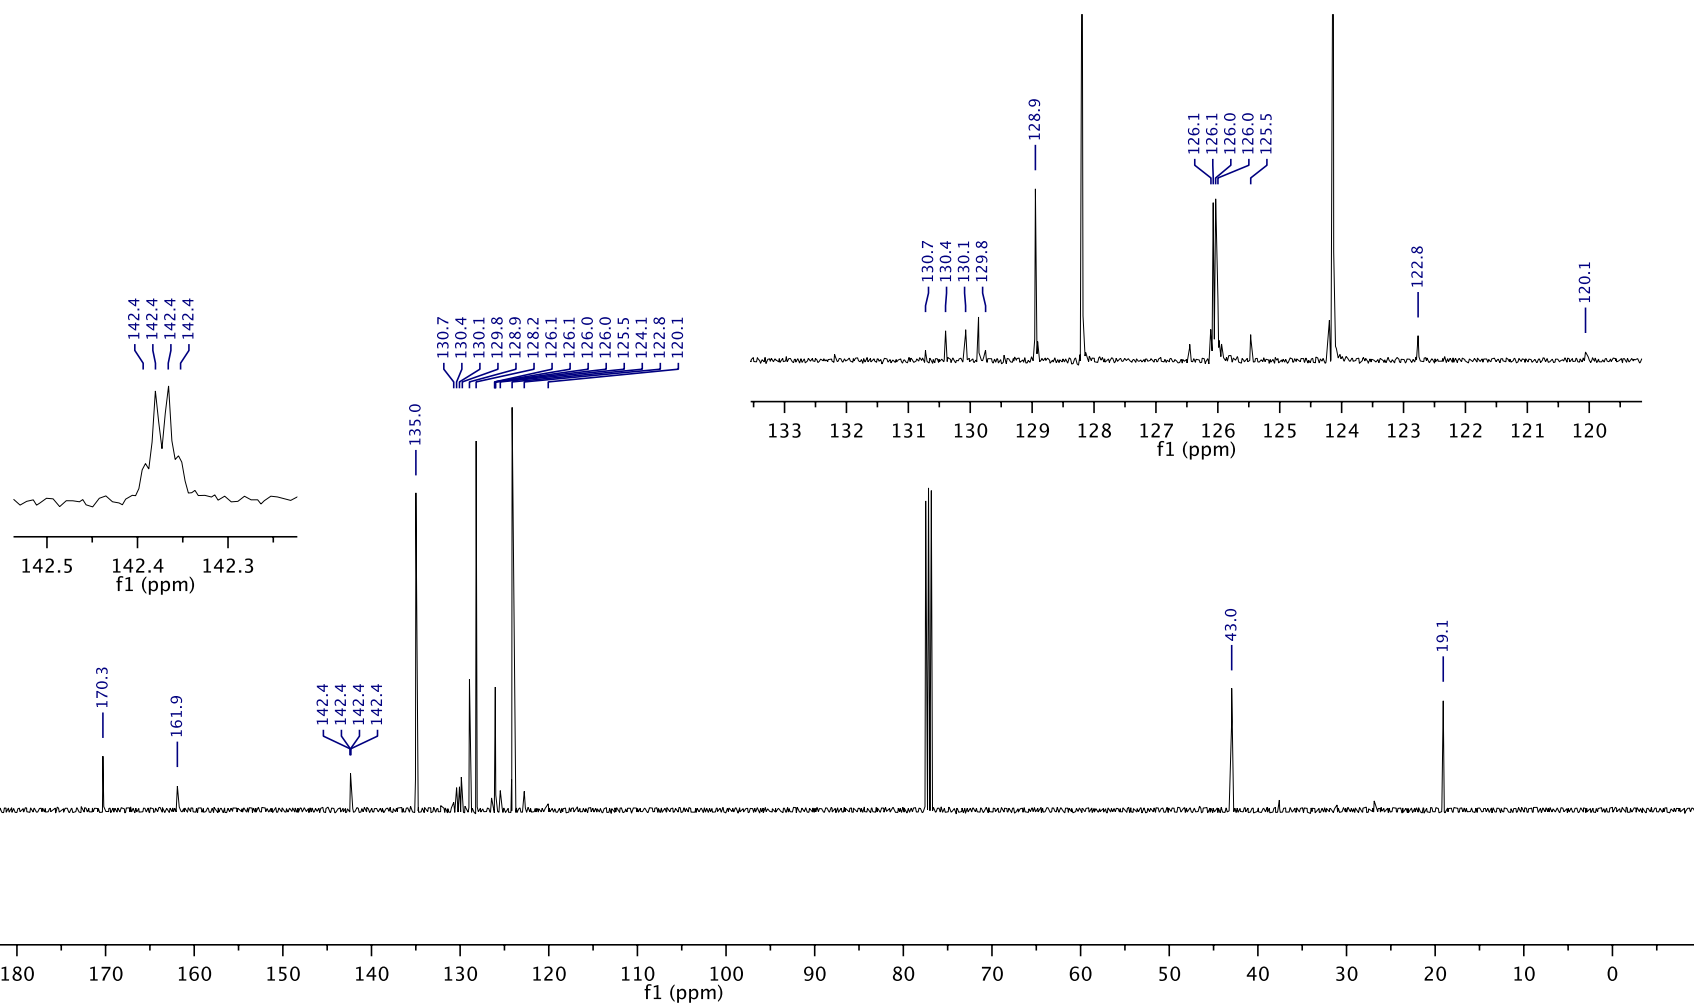

| Parameter              | Value               |
|------------------------|---------------------|
| Title                  | NAO-01-176A         |
| Origin                 | Varian              |
| Solvent                | "cdcl3"             |
| Temperature            | 25.0                |
| Pulse Sequence         | s2pul               |
| Number of Scans        | 16                  |
| Receiver Gain          | 30                  |
| Relaxation Delay       | 1.0000              |
| Pulse Width            | 6.3333              |
| Acquisition Time       | 0.9856              |
| Acquisition Date       | 2016-08-31T23:19:24 |
| Spectrometer Frequency | 282.34              |
| Spectral Width         | 64935.1             |
| Lowest Frequency       | -58259.3            |
| Nucleus                | 19F                 |
| Acquired Size          | 64000               |
| Spectral Size          | 131072              |

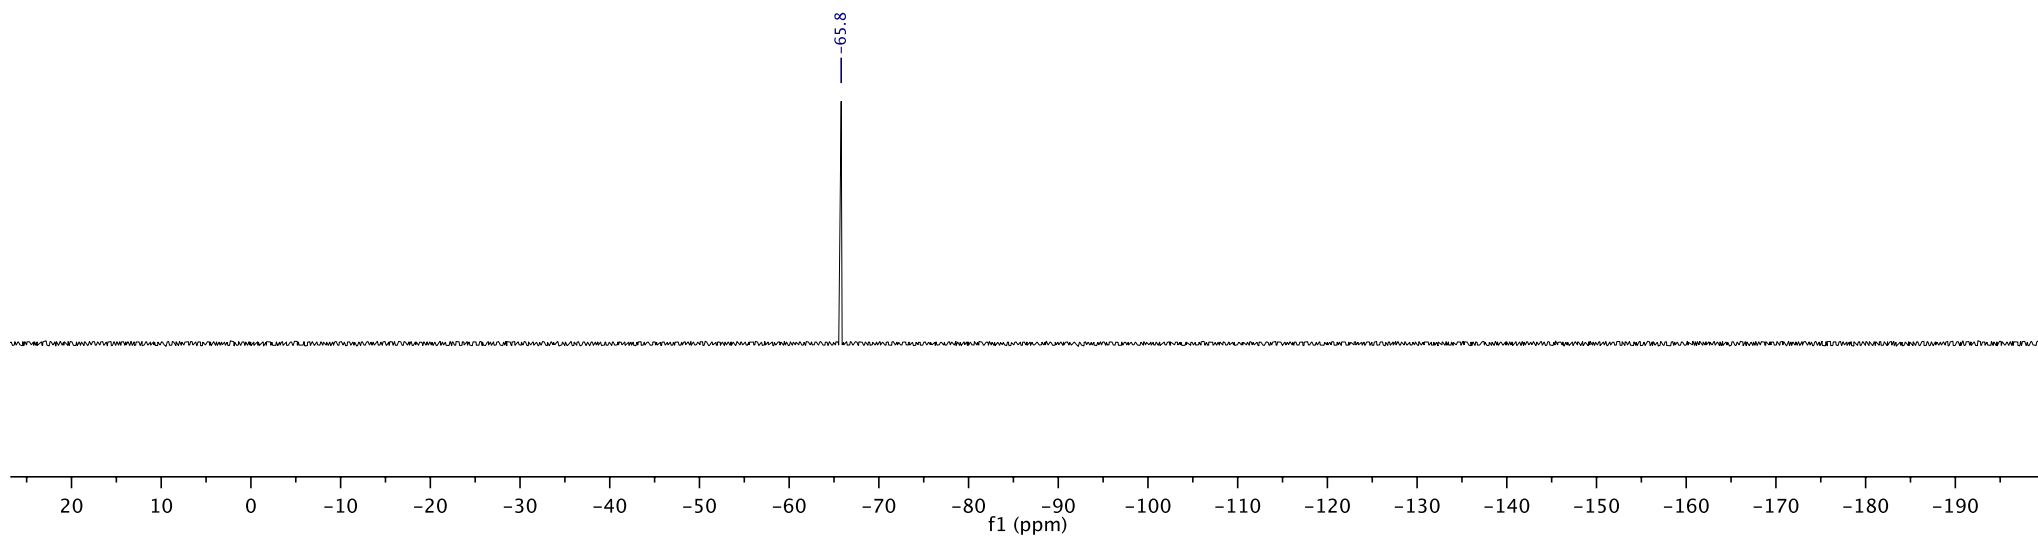

| Parameter              | Value               |
|------------------------|---------------------|
| Title                  | NAO-01-176A-C6F6    |
| Origin                 | Varian              |
| Solvent                | "cdcl3"             |
| Temperature            | 25.0                |
| Pulse Sequence         | s2pul               |
| Number of Scans        | 16                  |
| Receiver Gain          | 30                  |
| Relaxation Delay       | 1.0000              |
| Pulse Width            | 6.3333              |
| Acquisition Time       | 0.9856              |
| Acquisition Date       | 2016-08-31T23:23:38 |
| Spectrometer Frequency | 282.34              |
| Spectral Width         | 64935.1             |
| Lowest Frequency       | -58249.7            |
| Nucleus                | 19F                 |
| Acquired Size          | 64000               |
| Spectral Size          | 131072              |

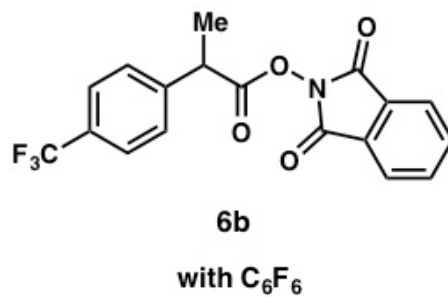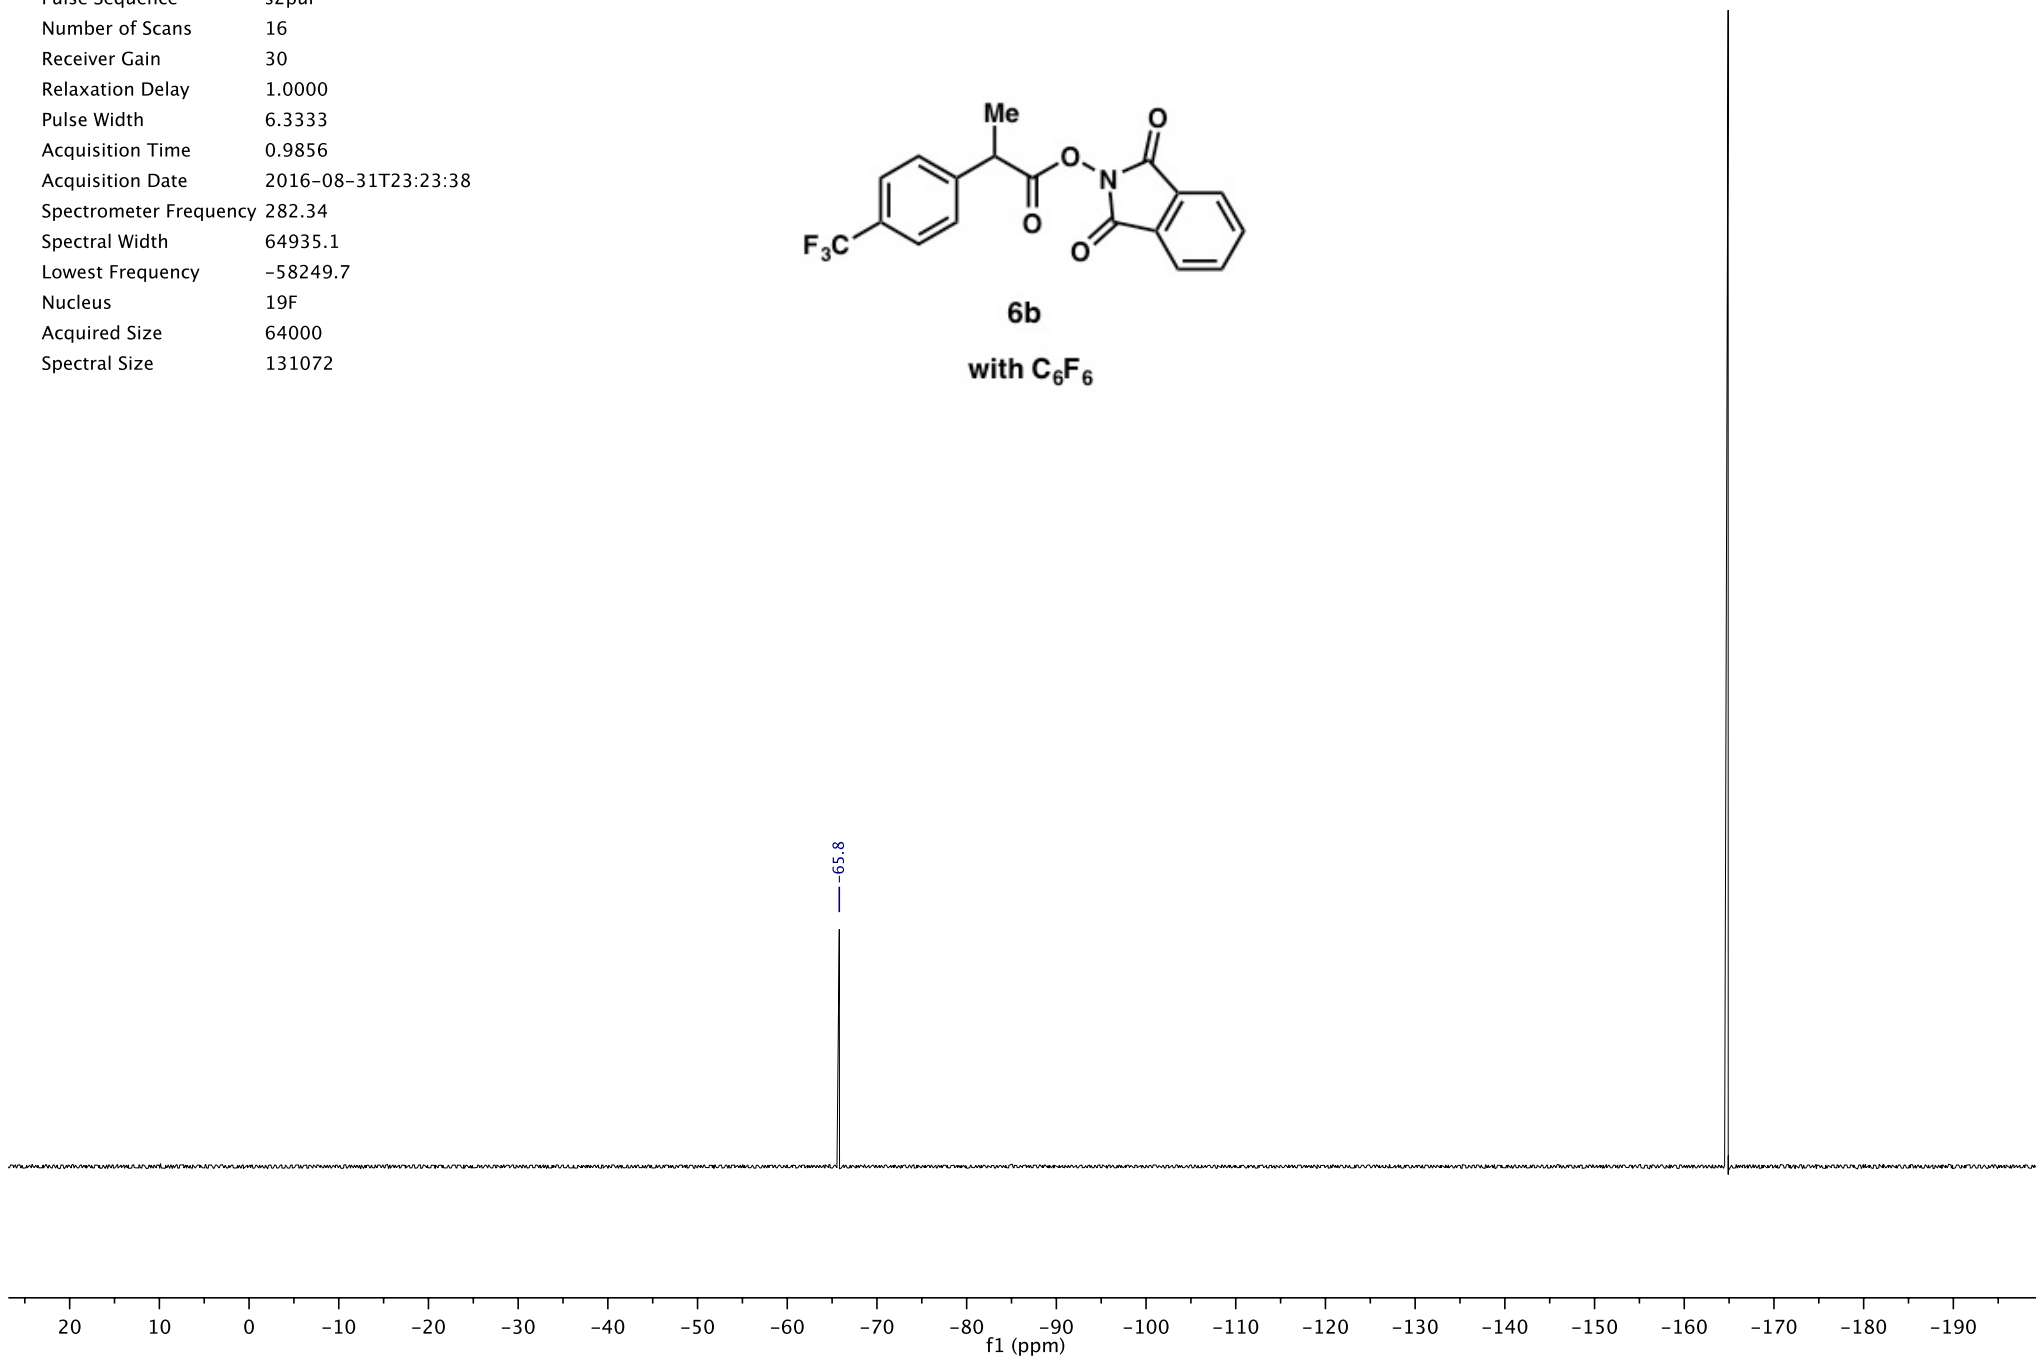

| Parameter              | Value               |
|------------------------|---------------------|
| Title                  | NAO-01-199-A.2.fid  |
| Origin                 | Bruker BioSpin GmbH |
| Solvent                | CDCl3               |
| Temperature            | 294.9               |
| Pulse Sequence         | zg30                |
| Number of Scans        | 16                  |
| Receiver Gain          | 112.8               |
| Relaxation Delay       | 1.0000              |
| Pulse Width            | 11.7000             |
| Acquisition Time       | 4.0894              |
| Acquisition Date       | 2016-08-19T23:03:07 |
| Spectrometer Frequency | 400.13              |
| Spectral Width         | 8012.8              |
| Lowest Frequency       | -1555.6             |
| Nucleus                | <sup>1</sup> H      |
| Acquired Size          | 32768               |
| Spectral Size          | 65536               |

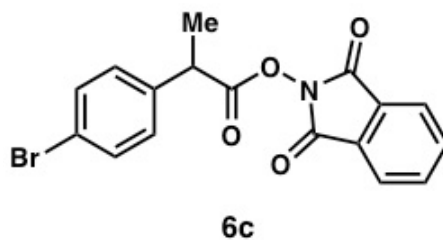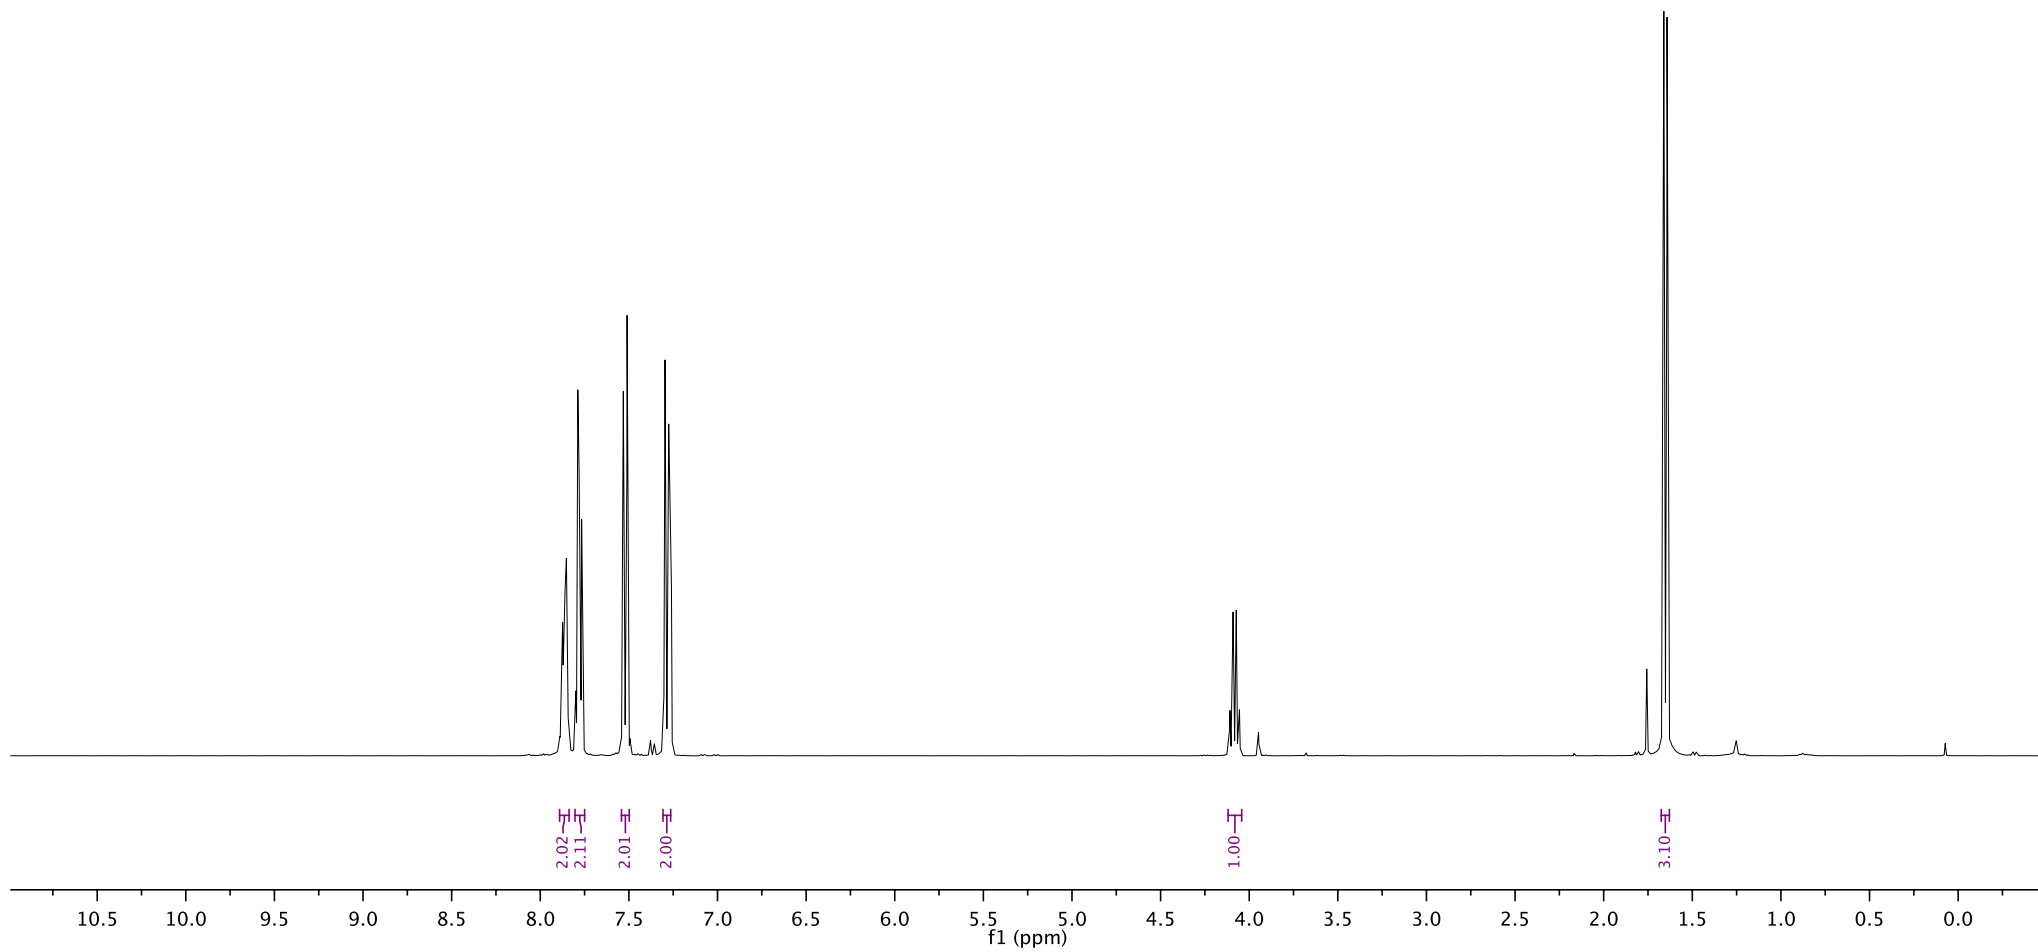



| Parameter              | Value               |
|------------------------|---------------------|
| Title                  | NAO-01-199-A.3.fid  |
| Origin                 | Bruker BioSpin GmbH |
| Solvent                | CDCl3               |
| Temperature            | 294.9               |
| Pulse Sequence         | zgpg30              |
| Number of Scans        | 128                 |
| Receiver Gain          | 72.0                |
| Relaxation Delay       | 2.0000              |
| Pulse Width            | 10.0000             |
| Acquisition Time       | 1.3631              |
| Acquisition Date       | 2016-08-19T23:11:04 |
| Spectrometer Frequency | 100.62              |
| Spectral Width         | 24038.5             |
| Lowest Frequency       | -1937.5             |
| Nucleus                | <sup>13</sup> C     |
| Acquired Size          | 32768               |
| Spectral Size          | 65536               |

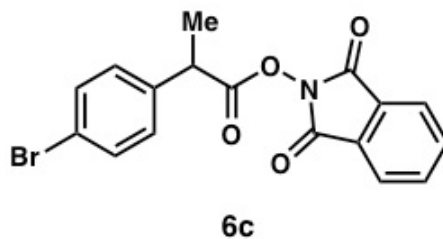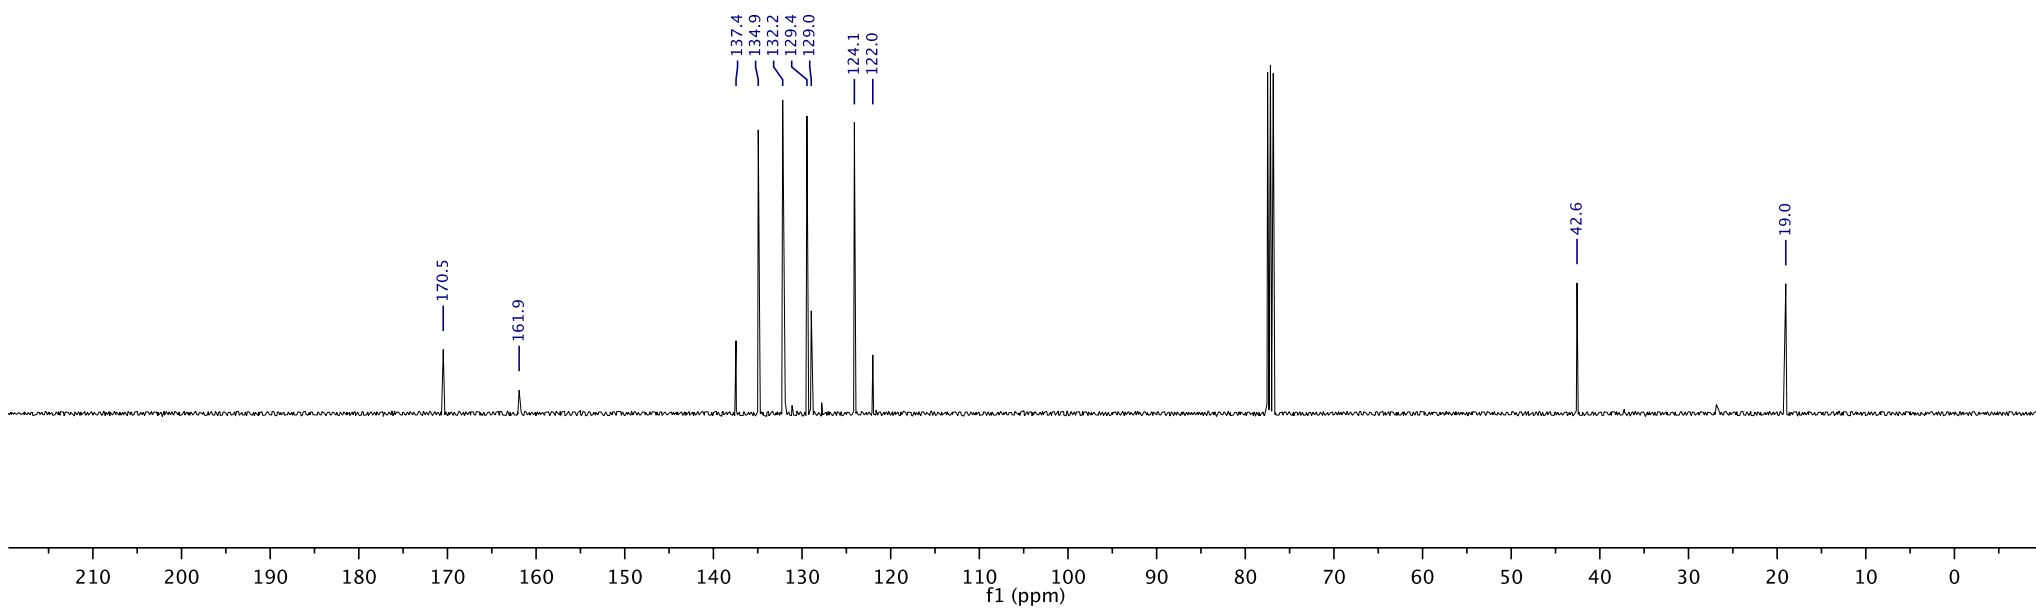

| Parameter              | Value               |
|------------------------|---------------------|
| Title                  | NAO-01-194-A.1.fid  |
| Origin                 | Bruker BioSpin GmbH |
| Solvent                | CDCl3               |
| Temperature            | 294.9               |
| Pulse Sequence         | zg30                |
| Number of Scans        | 16                  |
| Receiver Gain          | 87.8                |
| Relaxation Delay       | 1.0000              |
| Pulse Width            | 11.7000             |
| Acquisition Time       | 4.0894              |
| Acquisition Date       | 2016-09-23T19:21:20 |
| Spectrometer Frequency | 400.13              |
| Spectral Width         | 8012.8              |
| Lowest Frequency       | -1535.6             |
| Nucleus                | <sup>1</sup> H      |
| Acquired Size          | 32768               |
| Spectral Size          | 65536               |

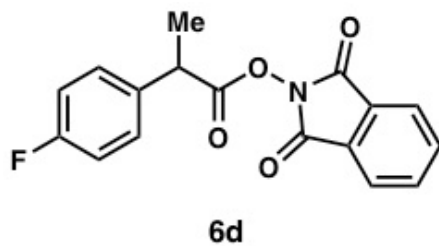

B (dd)  
7.77

D (m)  
7.08

A (dd)  
7.86

C (m)  
7.38

E (q)  
4.11

F (d)  
1.66

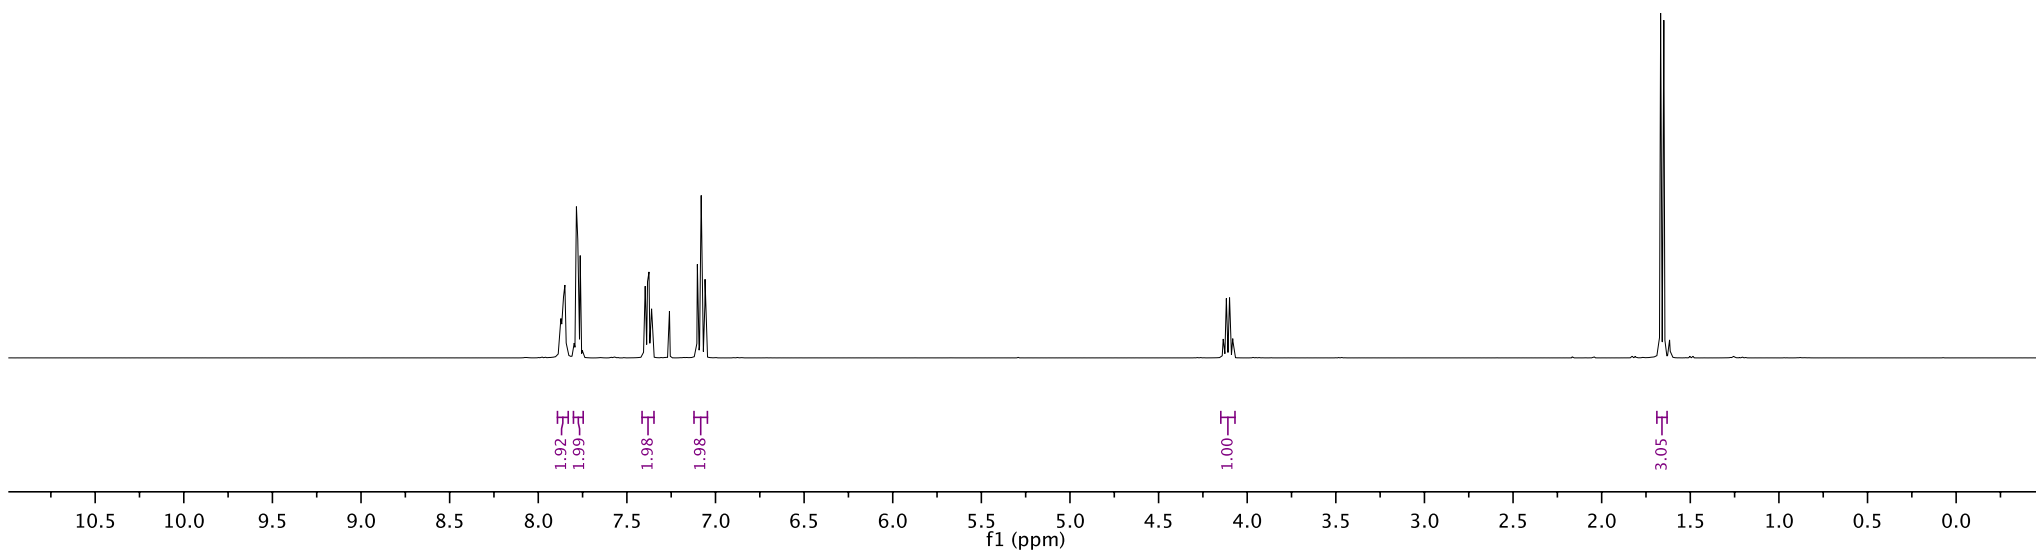

| Parameter              | Value               |
|------------------------|---------------------|
| Title                  | NAO-01-194-A.2.fid  |
| Origin                 | Bruker BioSpin GmbH |
| Solvent                | CDCl3               |
| Temperature            | 295.0               |
| Pulse Sequence         | zgpg30              |
| Number of Scans        | 128                 |
| Receiver Gain          | 55.5                |
| Relaxation Delay       | 2.0000              |
| Pulse Width            | 10.0000             |
| Acquisition Time       | 1.3631              |
| Acquisition Date       | 2016-09-23T19:29:17 |
| Spectrometer Frequency | 100.62              |
| Spectral Width         | 24038.5             |
| Lowest Frequency       | -1958.4             |
| Nucleus                | <sup>13</sup> C     |
| Acquired Size          | 32768               |
| Spectral Size          | 65536               |

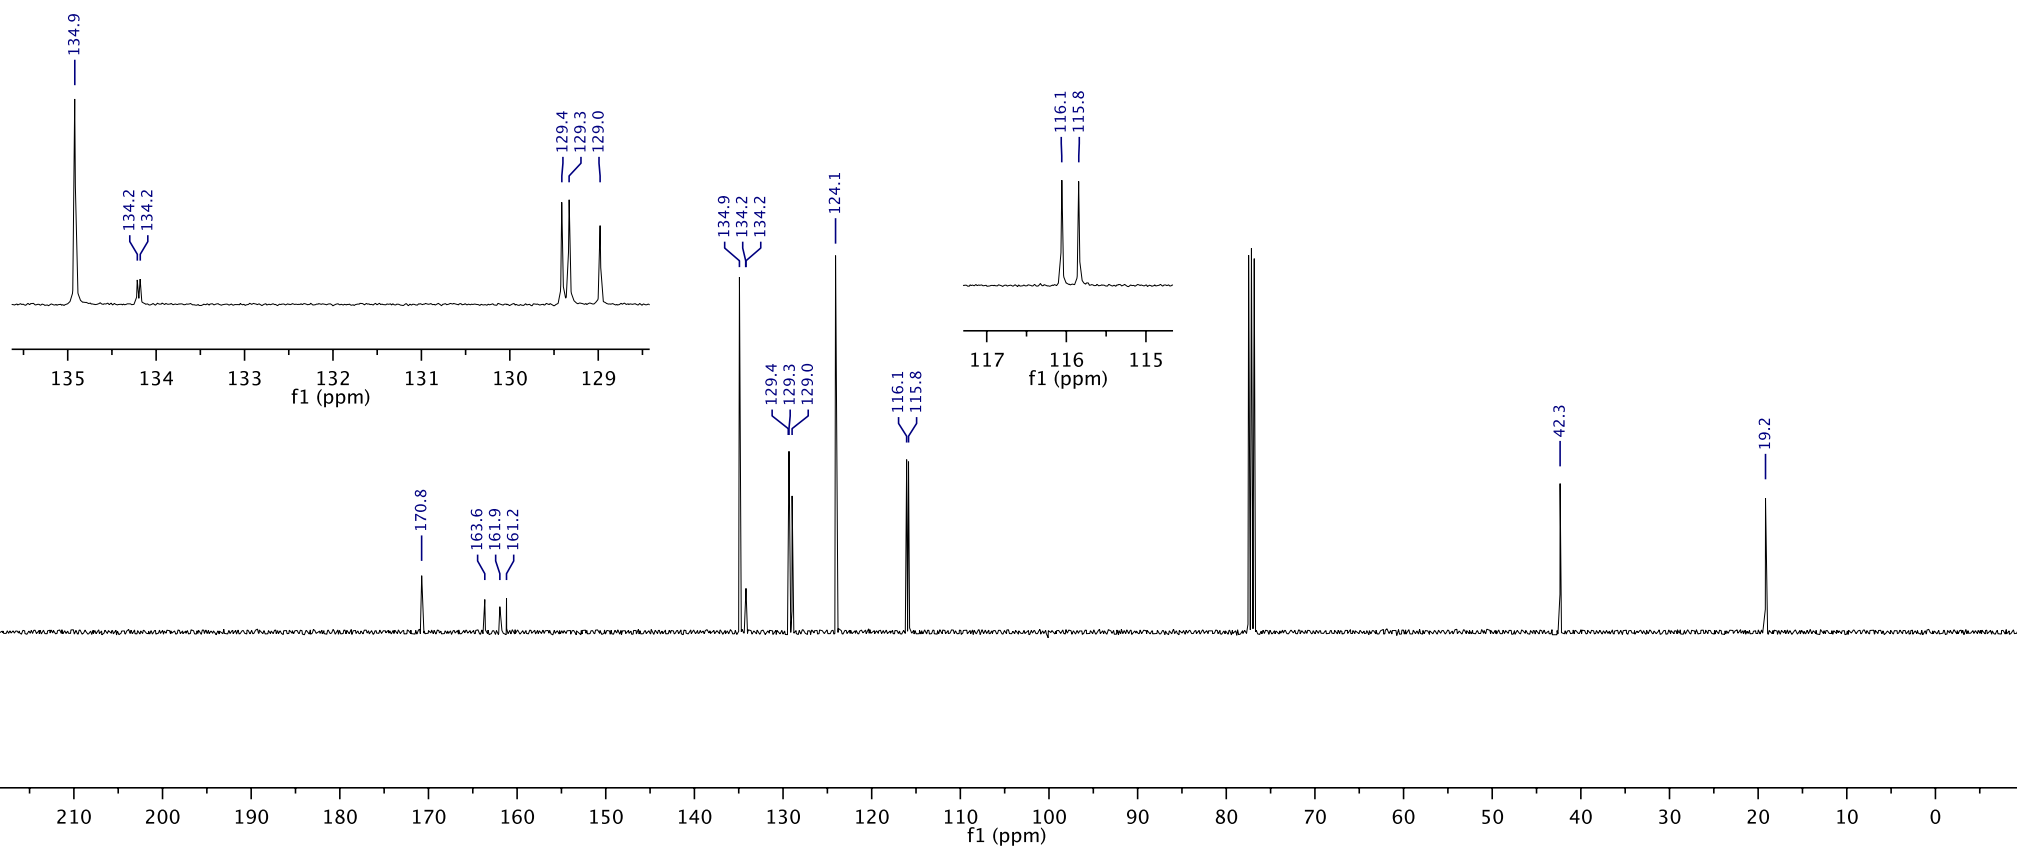

| Parameter              | Value               |
|------------------------|---------------------|
| Title                  | NAO-1-194A          |
| Origin                 | Varian              |
| Solvent                | "cdcl3"             |
| Temperature            | 25.0                |
| Pulse Sequence         | s2pul               |
| Number of Scans        | 16                  |
| Receiver Gain          | 30                  |
| Relaxation Delay       | 1.0000              |
| Pulse Width            | 6.3333              |
| Acquisition Time       | 0.9856              |
| Acquisition Date       | 2017-01-09T22:18:30 |
| Spectrometer Frequency | 282.34              |
| Spectral Width         | 64935.1             |
| Lowest Frequency       | -56468.7            |
| Nucleus                | 19F                 |
| Acquired Size          | 64000               |
| Spectral Size          | 131072              |

A (tt)  
-117.64

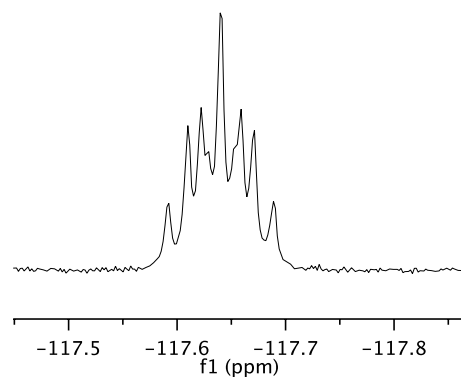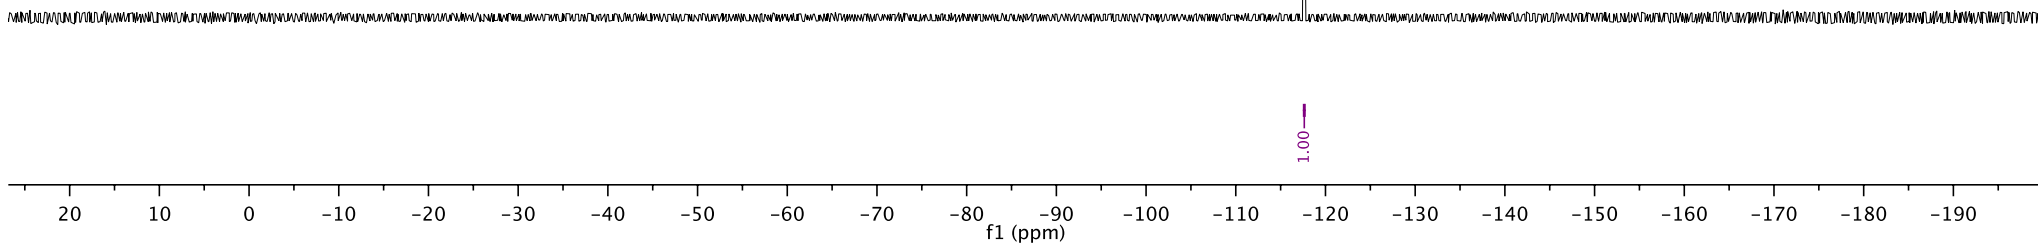

| Parameter              | Value               |
|------------------------|---------------------|
| Title                  | NAO-1-194A-C6F6     |
| Origin                 | Varian              |
| Solvent                | "cdcl3"             |
| Temperature            | 25.0                |
| Pulse Sequence         | s2pul               |
| Number of Scans        | 16                  |
| Receiver Gain          | 30                  |
| Relaxation Delay       | 1.0000              |
| Pulse Width            | 6.3333              |
| Acquisition Time       | 0.9856              |
| Acquisition Date       | 2017-01-09T22:35:50 |
| Spectrometer Frequency | 282.34              |
| Spectral Width         | 64935.1             |
| Lowest Frequency       | -56468.7            |
| Nucleus                | 19F                 |
| Acquired Size          | 64000               |
| Spectral Size          | 131072              |

A (tt)  
-117.64

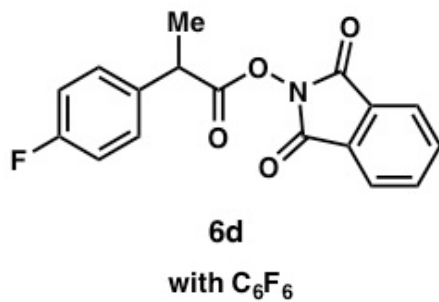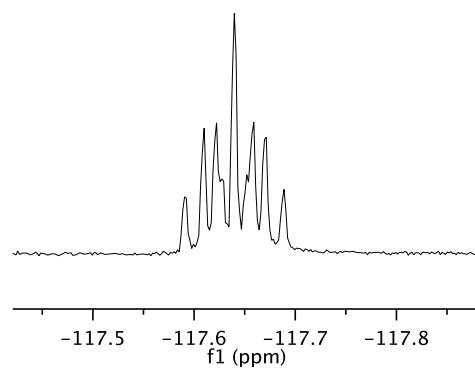

1.00

20 10 0 -10 -20 -30 -40 -50 -60 -70 -80 -90 -100 -110 -120 -130 -140 -150 -160 -170 -180 -190  
f1 (ppm)

| Parameter              | Value               |
|------------------------|---------------------|
| Title                  | NAO-02-087-A.1.fid  |
| Origin                 | Bruker BioSpin GmbH |
| Solvent                | CDCl3               |
| Temperature            | 295.0               |
| Pulse Sequence         | zg30                |
| Number of Scans        | 16                  |
| Receiver Gain          | 78.7                |
| Relaxation Delay       | 1.0000              |
| Pulse Width            | 11.7000             |
| Acquisition Time       | 4.0894              |
| Acquisition Date       | 2017-01-06T23:07:53 |
| Spectrometer Frequency | 400.13              |
| Spectral Width         | 8012.8              |
| Lowest Frequency       | -1535.6             |
| Nucleus                | <sup>1</sup> H      |
| Acquired Size          | 32768               |
| Spectral Size          | 65536               |

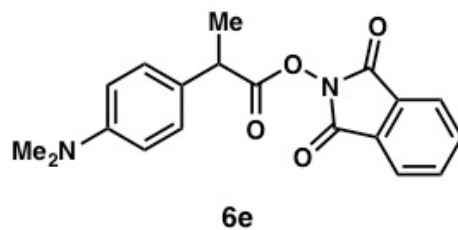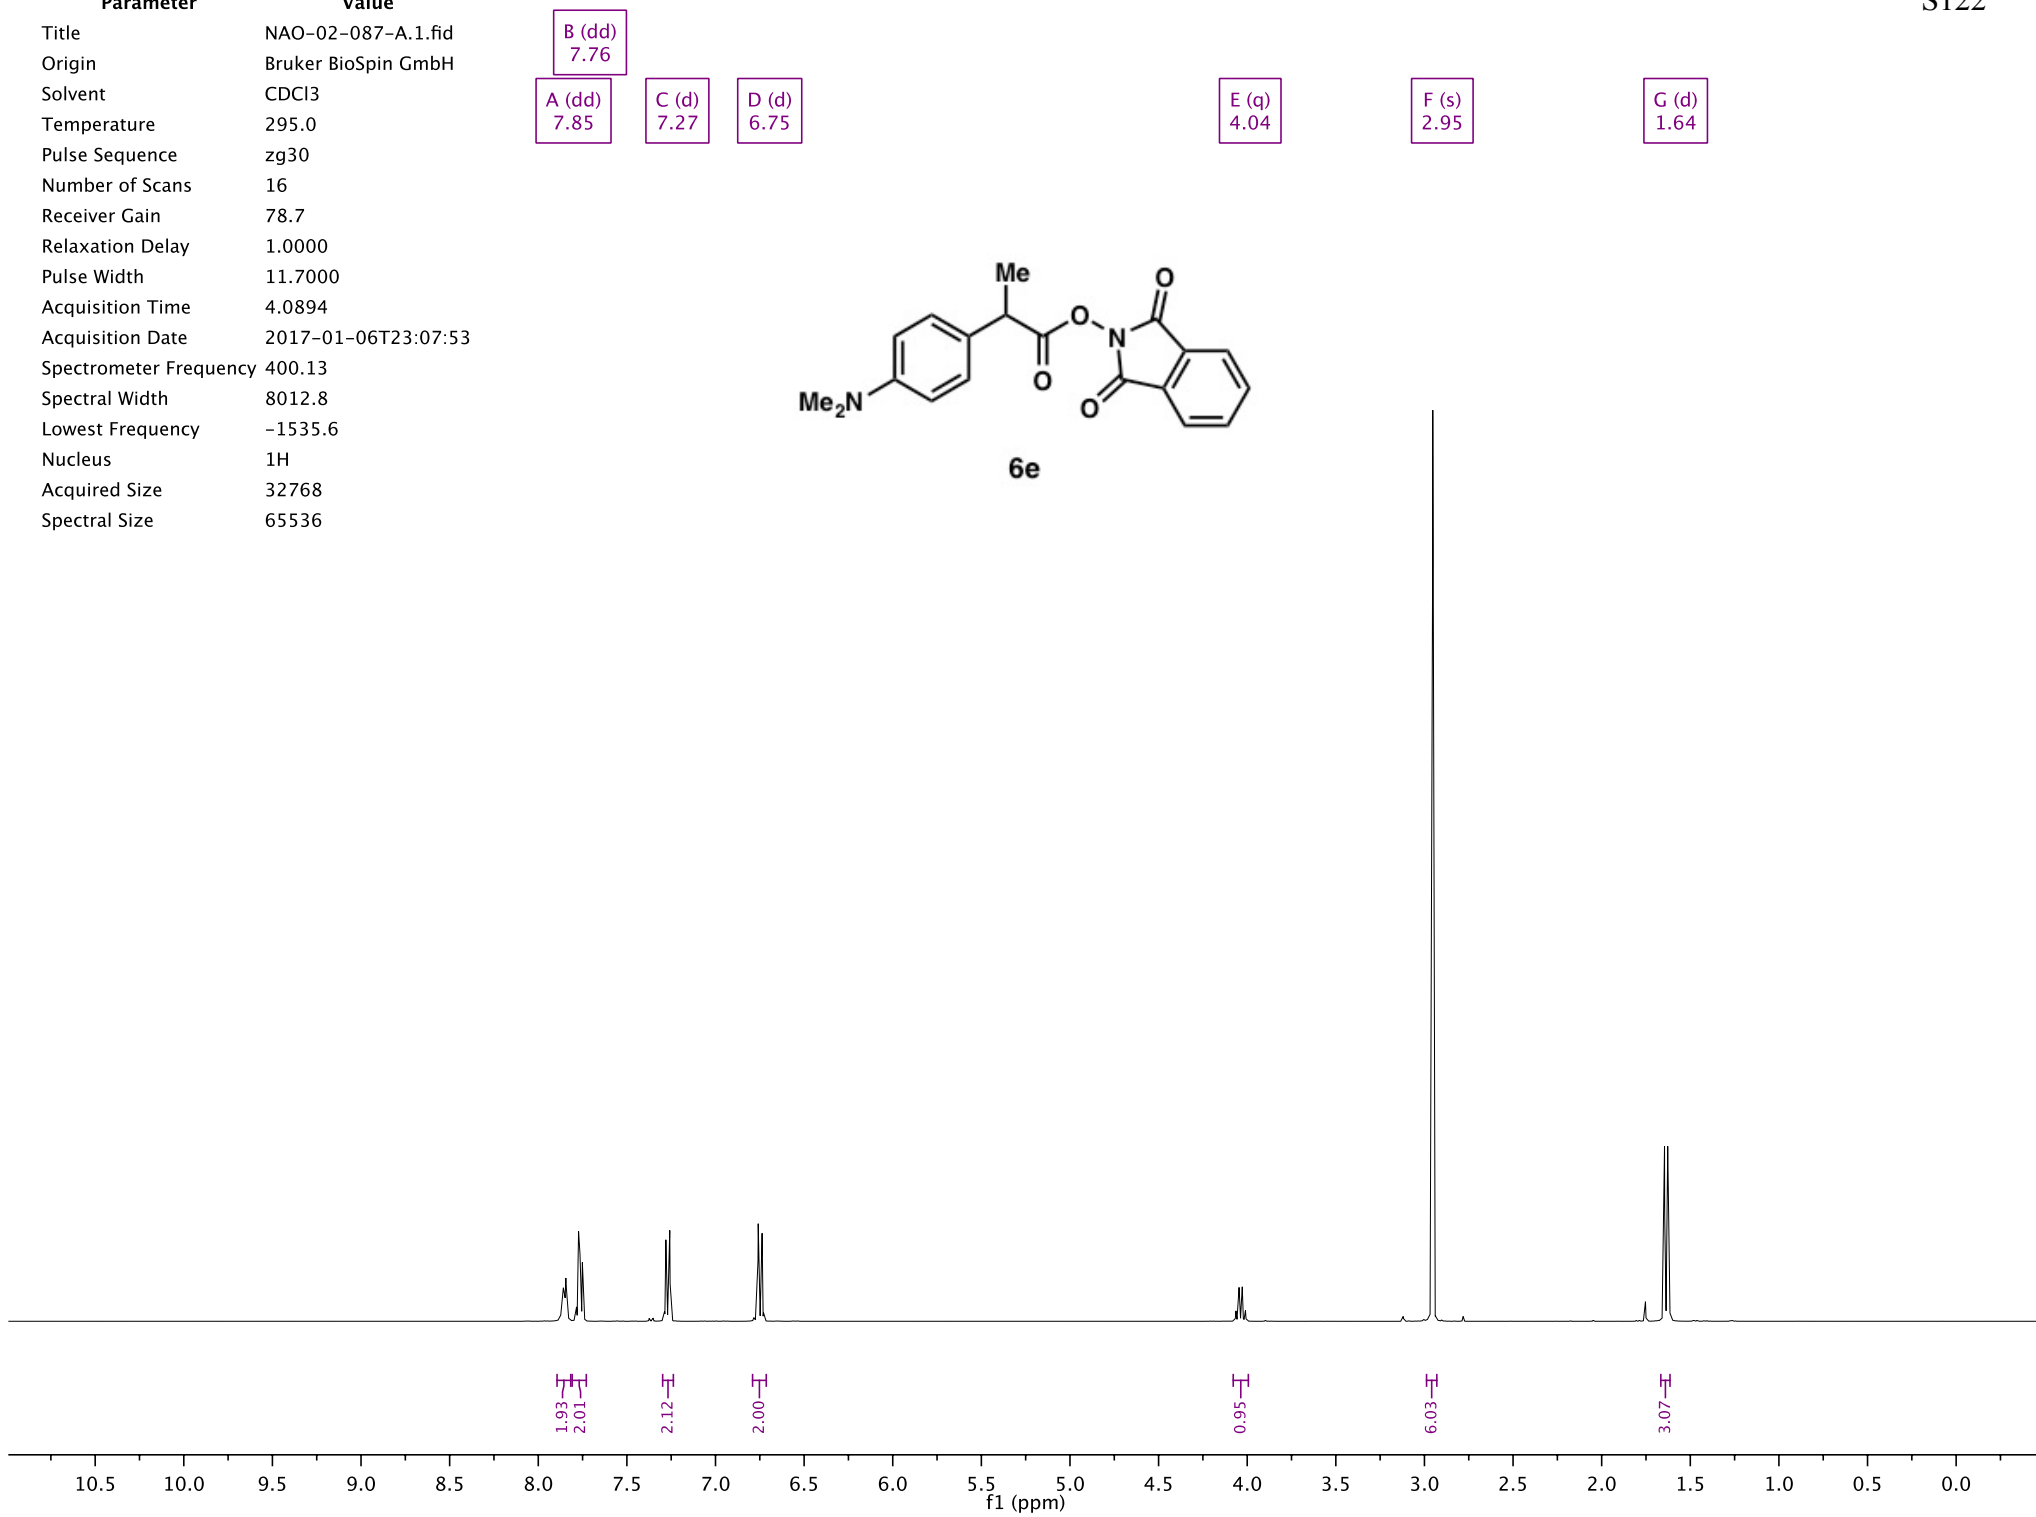

| Parameter              | Value               |
|------------------------|---------------------|
| Title                  | NAO-02-087-A.2.fid  |
| Origin                 | Bruker BioSpin GmbH |
| Solvent                | CDCl3               |
| Temperature            | 294.9               |
| Pulse Sequence         | zgpg30              |
| Number of Scans        | 128                 |
| Receiver Gain          | 78.7                |
| Relaxation Delay       | 2.0000              |
| Pulse Width            | 10.0000             |
| Acquisition Time       | 1.3631              |
| Acquisition Date       | 2017-01-06T23:15:50 |
| Spectrometer Frequency | 100.62              |
| Spectral Width         | 24038.5             |
| Lowest Frequency       | -1958.4             |
| Nucleus                | <sup>13</sup> C     |
| Acquired Size          | 32768               |
| Spectral Size          | 65536               |

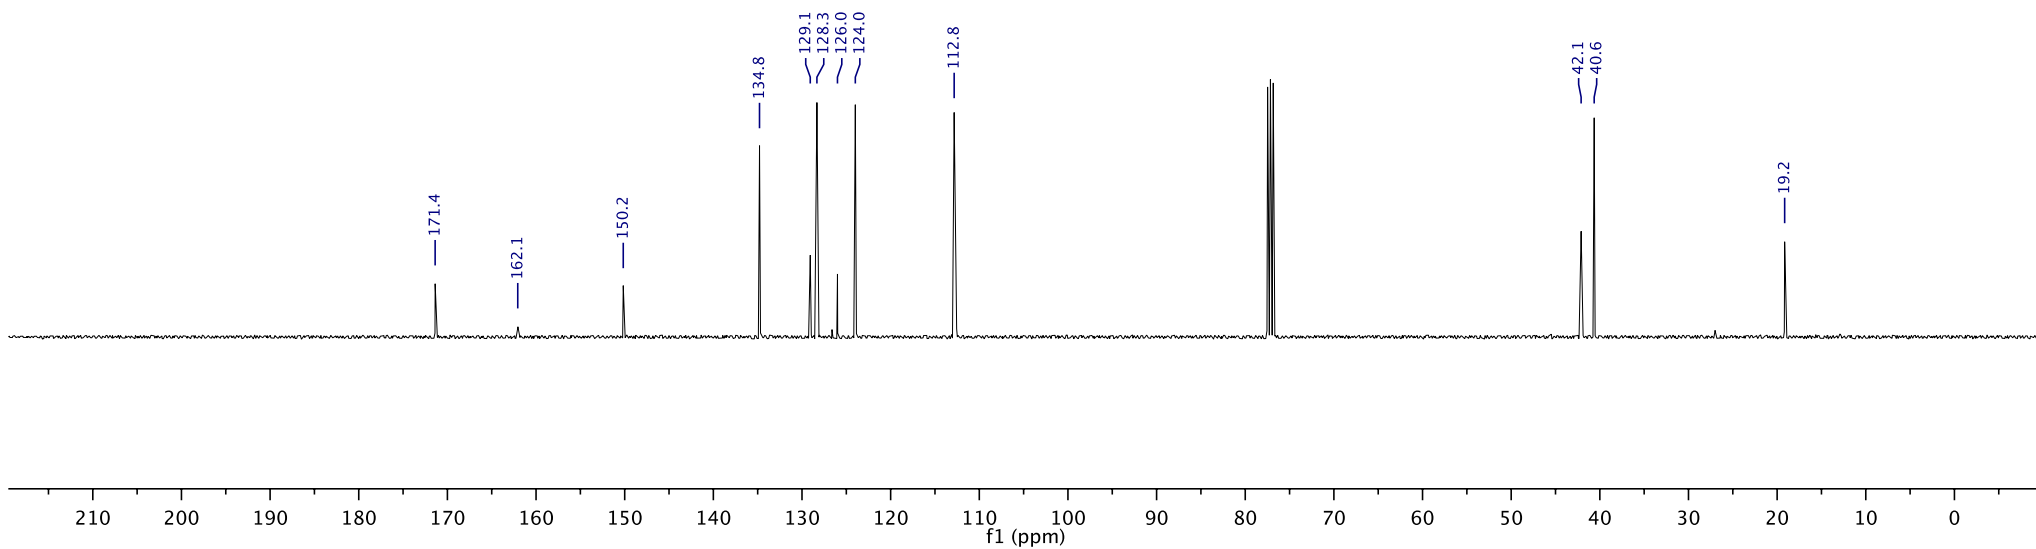

| Parameter              | Value               |
|------------------------|---------------------|
| Title                  | NAO-02-060-A.1.fid  |
| Origin                 | Bruker BioSpin GmbH |
| Solvent                | CDCl3               |
| Temperature            | 294.9               |
| Pulse Sequence         | zg30                |
| Number of Scans        | 16                  |
| Receiver Gain          | 127.1               |
| Relaxation Delay       | 1.0000              |
| Pulse Width            | 11.7000             |
| Acquisition Time       | 4.0894              |
| Acquisition Date       | 2017-01-06T22:09:26 |
| Spectrometer Frequency | 400.13              |
| Spectral Width         | 8012.8              |
| Lowest Frequency       | -1535.6             |
| Nucleus                | <sup>1</sup> H      |
| Acquired Size          | 32768               |
| Spectral Size          | 65536               |

|        |      |        |      |
|--------|------|--------|------|
| B (dd) | 7.79 | E (dd) | 7.26 |
| A (dd) | 7.87 | D (d)  | 7.47 |
| C (d)  | 7.52 |        |      |

F (q)  
4.08G (d)  
1.66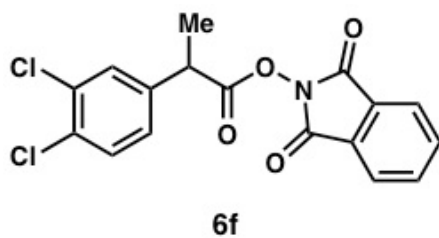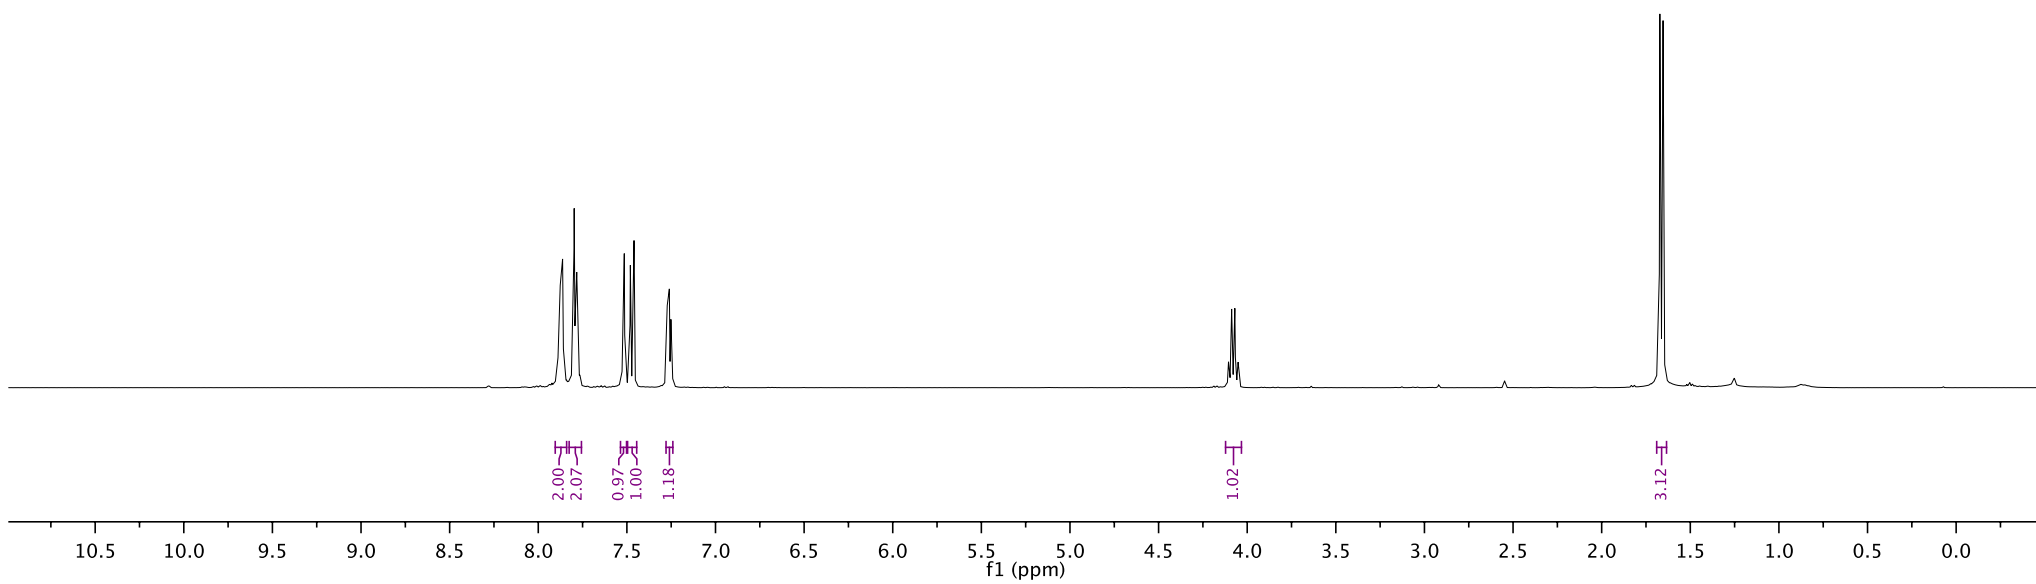



| Parameter              | Value               |
|------------------------|---------------------|
| Title                  | NAO-02-060-A.2.fid  |
| Origin                 | Bruker BioSpin GmbH |
| Solvent                | CDCl3               |
| Temperature            | 294.9               |
| Pulse Sequence         | zgpg30              |
| Number of Scans        | 128                 |
| Receiver Gain          | 64.2                |
| Relaxation Delay       | 2.0000              |
| Pulse Width            | 10.0000             |
| Acquisition Time       | 1.3631              |
| Acquisition Date       | 2017-01-06T22:17:23 |
| Spectrometer Frequency | 100.62              |
| Spectral Width         | 24038.5             |
| Lowest Frequency       | -1958.4             |
| Nucleus                | <sup>13</sup> C     |
| Acquired Size          | 32768               |
| Spectral Size          | 65536               |

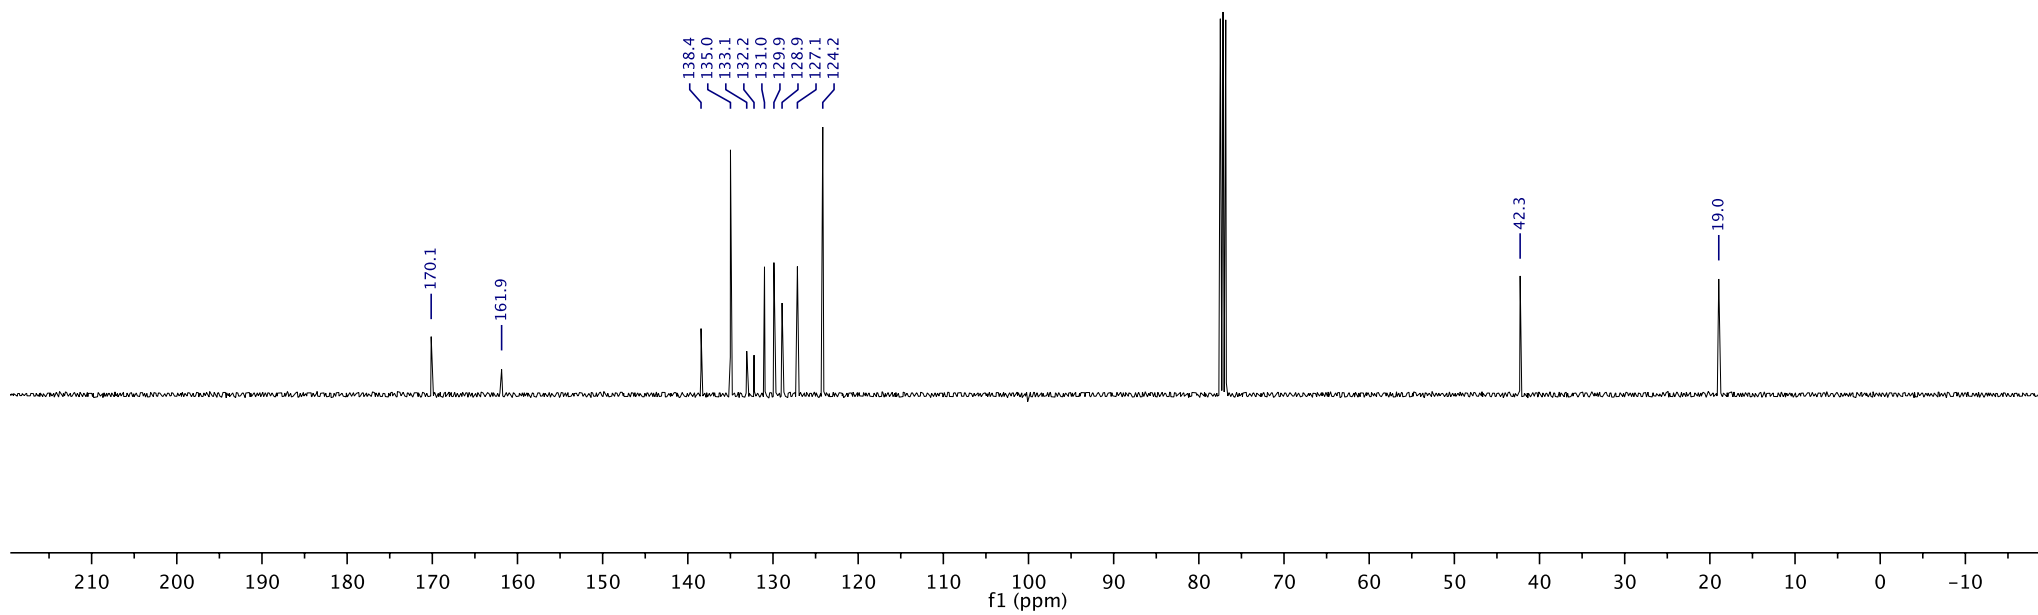



| Parameter              | Value               |
|------------------------|---------------------|
| Title                  | KS-1-173.2.fid      |
| Origin                 | Bruker BioSpin GmbH |
| Solvent                | CDCl3               |
| Temperature            | 294.9               |
| Pulse Sequence         | zgpg30              |
| Number of Scans        | 128                 |
| Receiver Gain          | 87.8                |
| Relaxation Delay       | 2.0000              |
| Pulse Width            | 10.0000             |
| Acquisition Time       | 1.3631              |
| Acquisition Date       | 2016-08-18T04:57:35 |
| Spectrometer Frequency | 100.62              |
| Spectral Width         | 24038.5             |
| Lowest Frequency       | -1940.8             |
| Nucleus                | <sup>13</sup> C     |
| Acquired Size          | 32768               |
| Spectral Size          | 65536               |

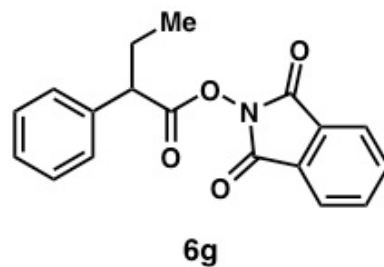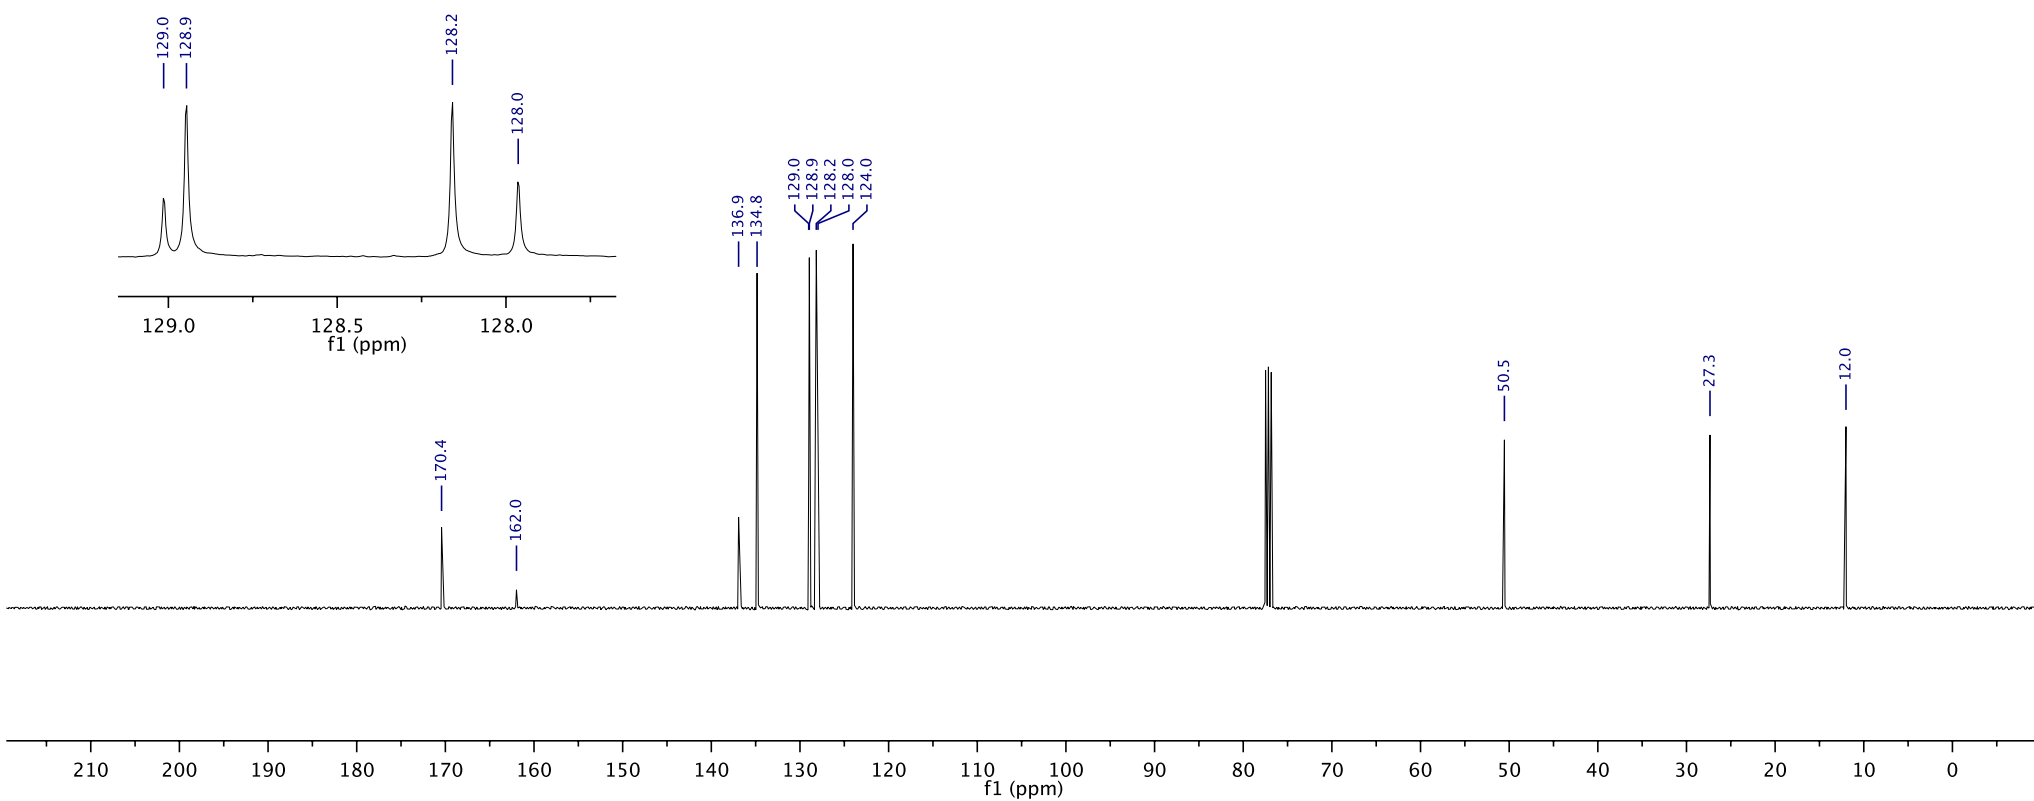

| Parameter              | Value               |
|------------------------|---------------------|
| Title                  | KS-1-203.1.fid      |
| Origin                 | Bruker BioSpin GmbH |
| Solvent                | CDCl3               |
| Temperature            | 295.0               |
| Pulse Sequence         | zg30                |
| Number of Scans        | 16                  |
| Receiver Gain          | 64.2                |
| Relaxation Delay       | 1.0000              |
| Pulse Width            | 11.7000             |
| Acquisition Time       | 4.0894              |
| Acquisition Date       | 2016-08-18T02:52:51 |
| Spectrometer Frequency | 400.13              |
| Spectral Width         | 8012.8              |
| Lowest Frequency       | -1555.6             |
| Nucleus                | <sup>1</sup> H      |
| Acquired Size          | 32768               |
| Spectral Size          | 65536               |

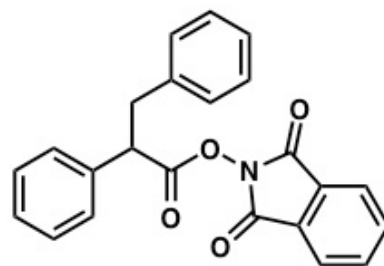

6h

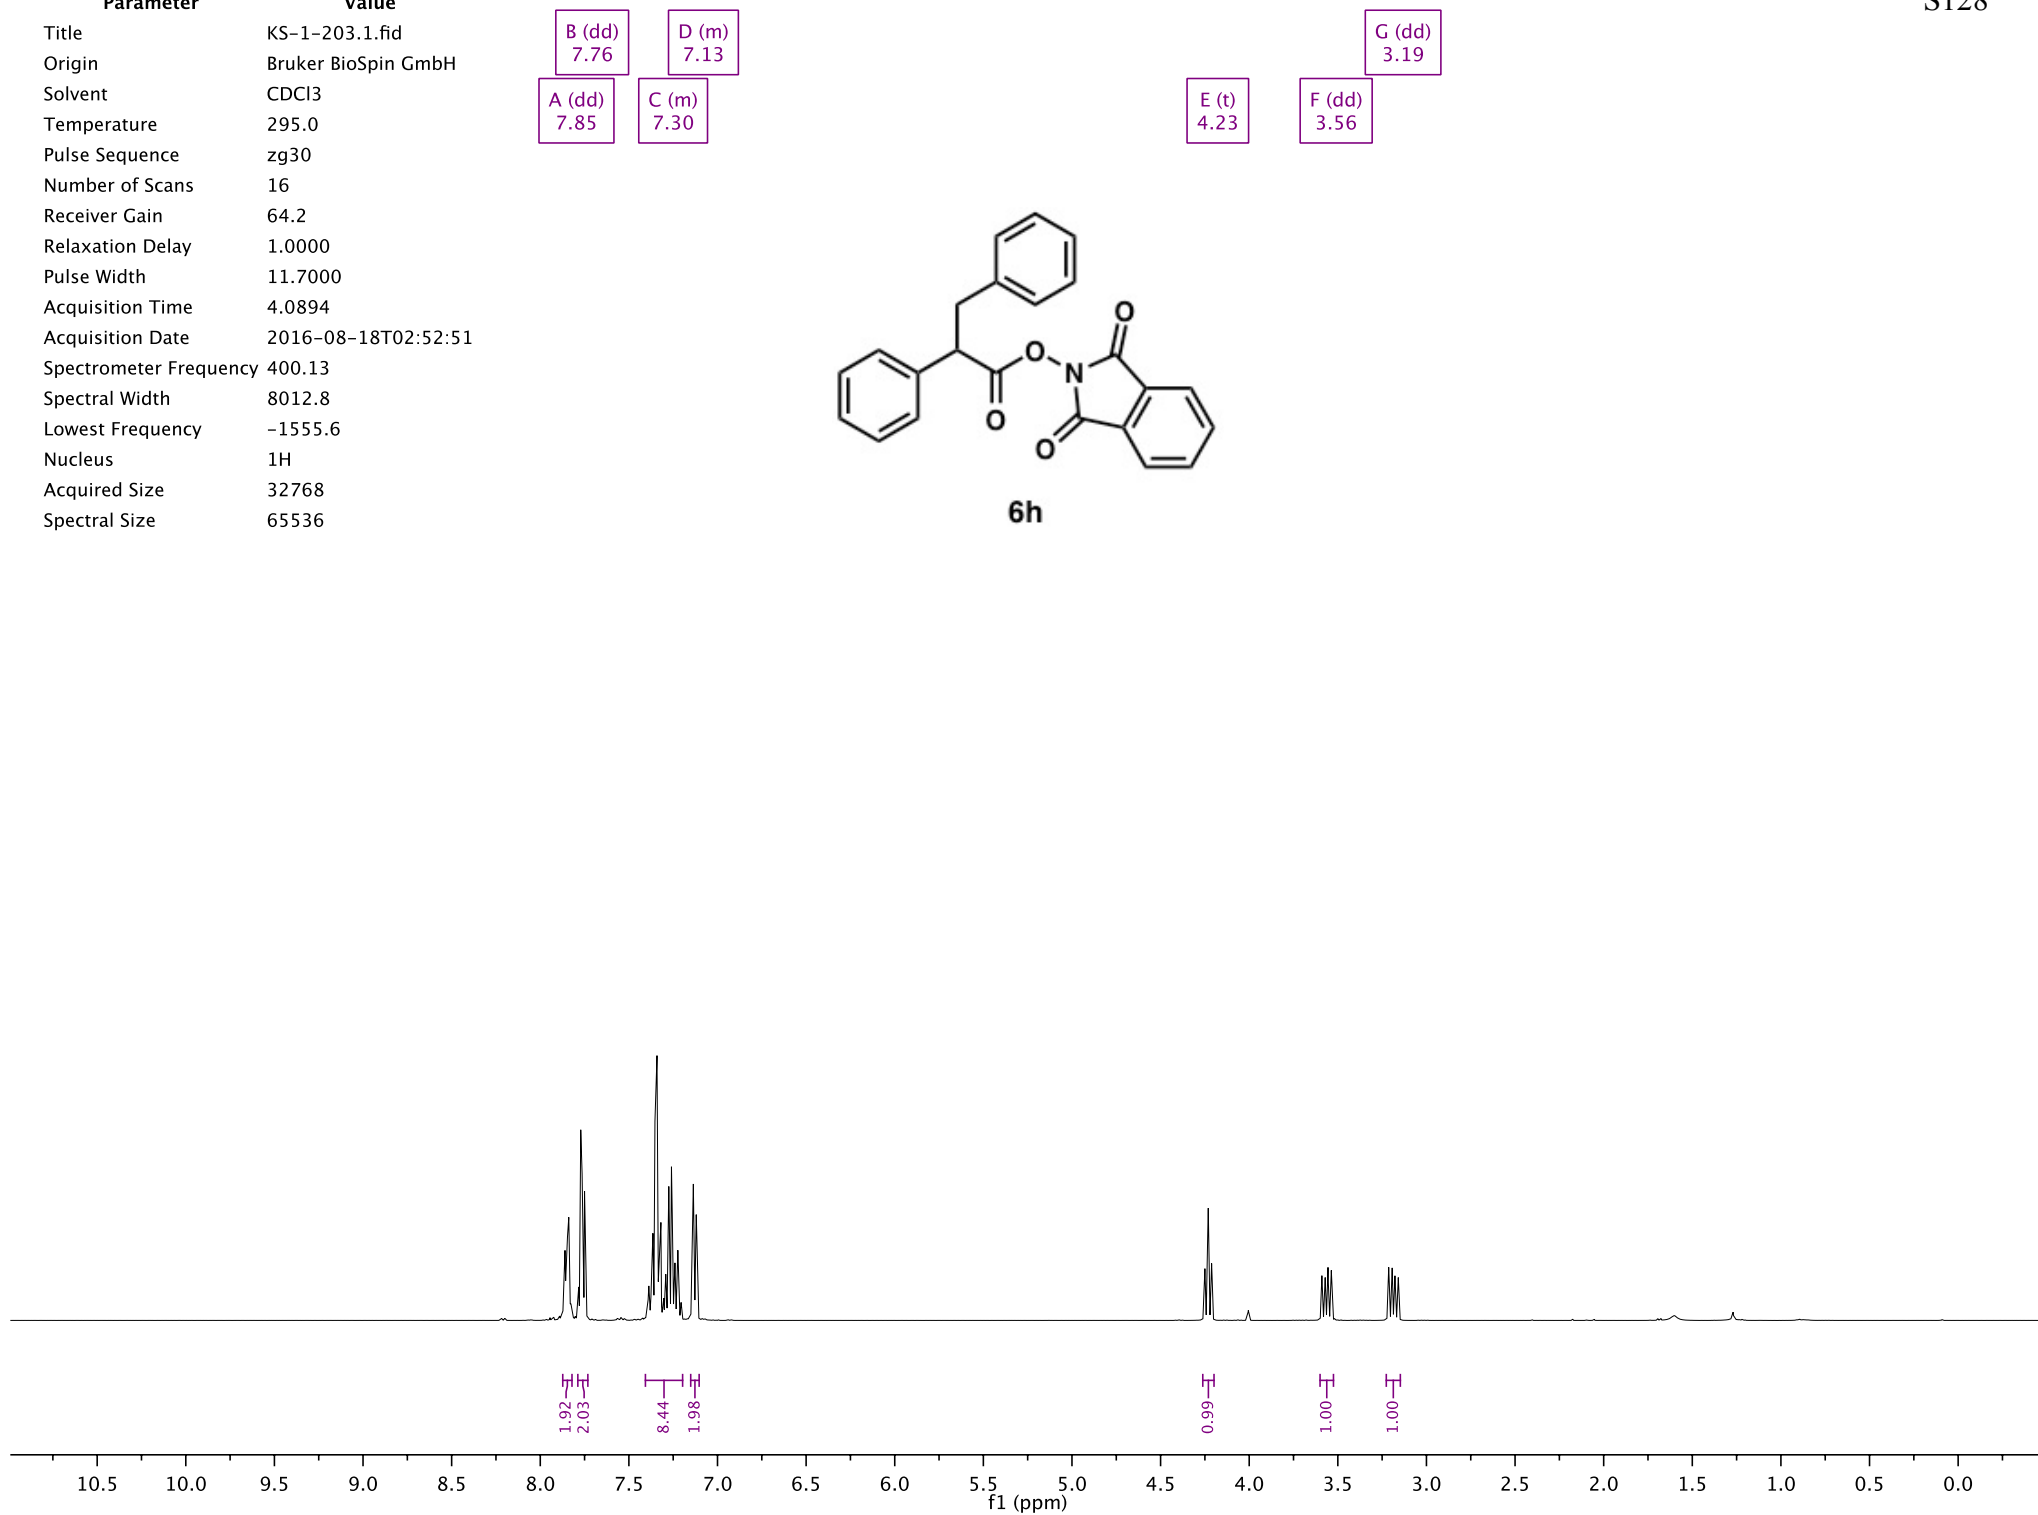

| Parameter              | Value               |
|------------------------|---------------------|
| Title                  | KS-1-203.2.fid      |
| Origin                 | Bruker BioSpin GmbH |
| Solvent                | CDCl3               |
| Temperature            | 295.0               |
| Pulse Sequence         | zgpg30              |
| Number of Scans        | 128                 |
| Receiver Gain          | 72.0                |
| Relaxation Delay       | 2.0000              |
| Pulse Width            | 10.0000             |
| Acquisition Time       | 1.3631              |
| Acquisition Date       | 2016-08-18T03:00:41 |
| Spectrometer Frequency | 100.62              |
| Spectral Width         | 24038.5             |
| Lowest Frequency       | -1941.0             |
| Nucleus                | <sup>13</sup> C     |
| Acquired Size          | 32768               |
| Spectral Size          | 65536               |

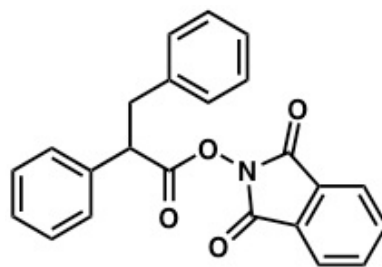

6h

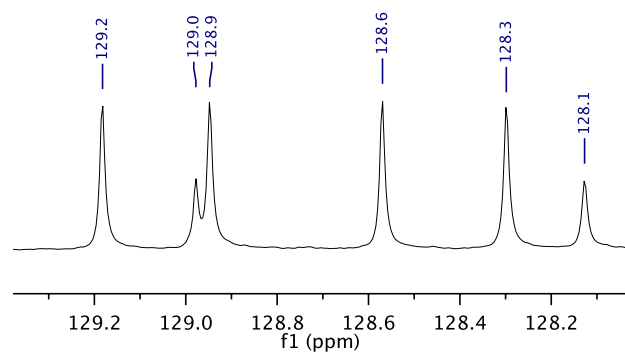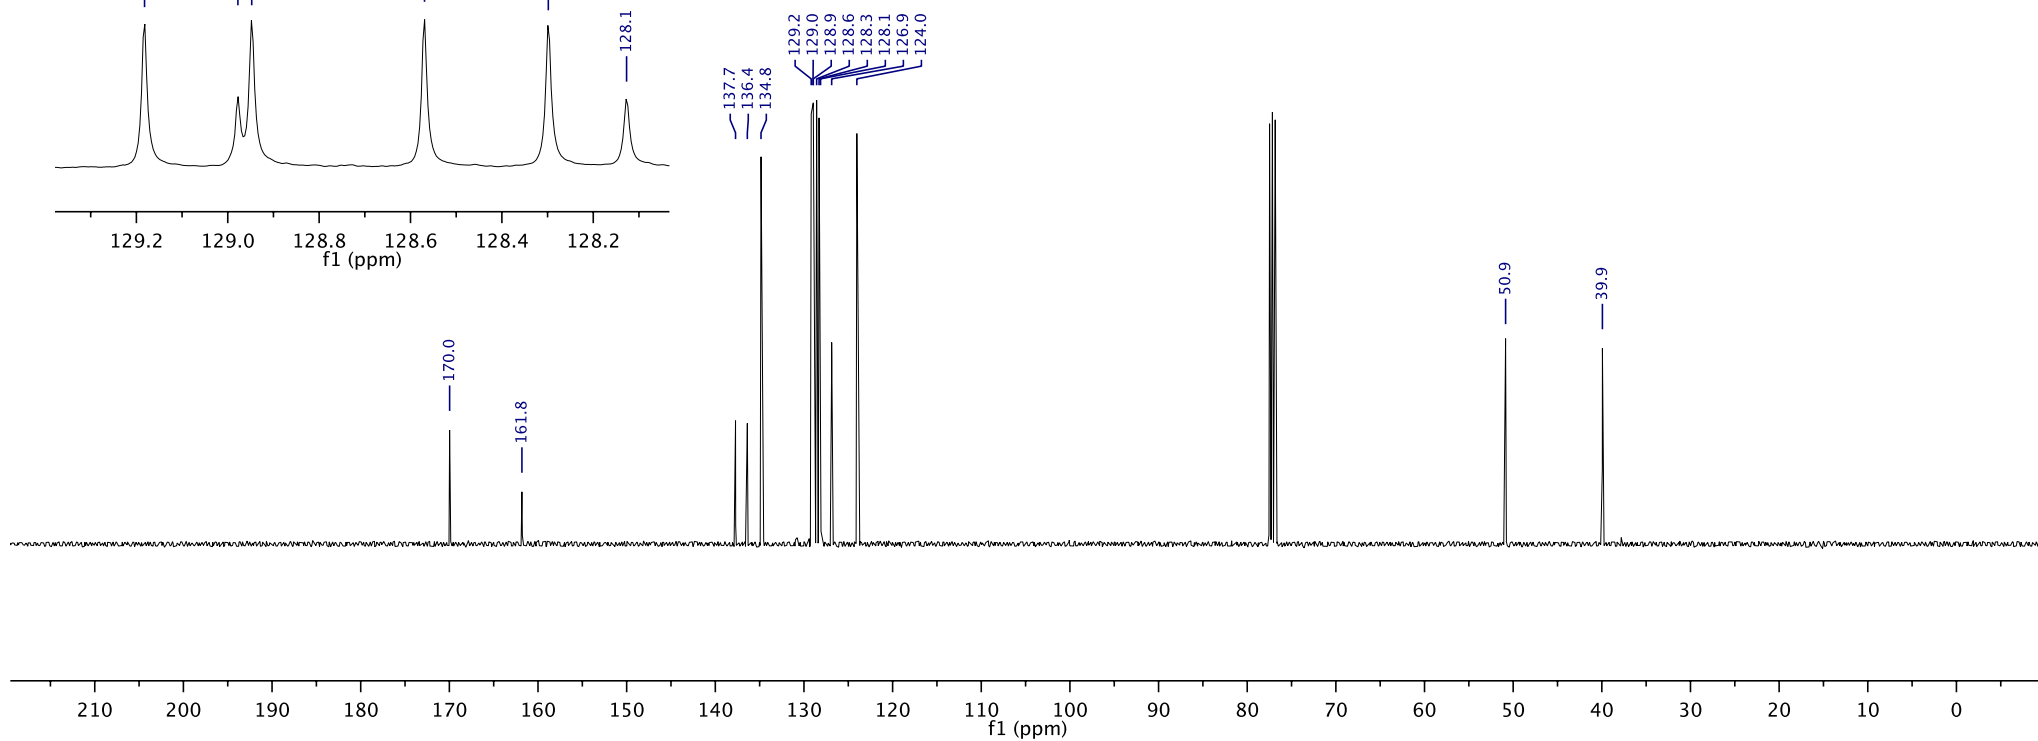

| Parameter              | Value               |
|------------------------|---------------------|
| Title                  | NAO-01-186-A.1.fid  |
| Origin                 | Bruker BioSpin GmbH |
| Solvent                | CDCl3               |
| Temperature            | 295.0               |
| Pulse Sequence         | zg30                |
| Number of Scans        | 16                  |
| Receiver Gain          | 55.5                |
| Relaxation Delay       | 1.0000              |
| Pulse Width            | 11.7000             |
| Acquisition Time       | 4.0894              |
| Acquisition Date       | 2016-08-18T05:47:44 |
| Spectrometer Frequency | 400.13              |
| Spectral Width         | 8012.8              |
| Lowest Frequency       | -1555.6             |
| Nucleus                | 1H                  |
| Acquired Size          | 32768               |
| Spectral Size          | 65536               |

|        |      |
|--------|------|
| B (dd) | 7.76 |
| A (dd) | 7.84 |
| C (m)  | 7.38 |

|       |      |
|-------|------|
| D (d) | 3.58 |
|-------|------|

|       |      |
|-------|------|
| E (m) | 2.44 |
|-------|------|

|       |      |
|-------|------|
| F (d) | 1.23 |
| G (d) | 0.84 |

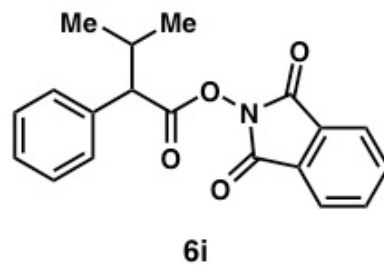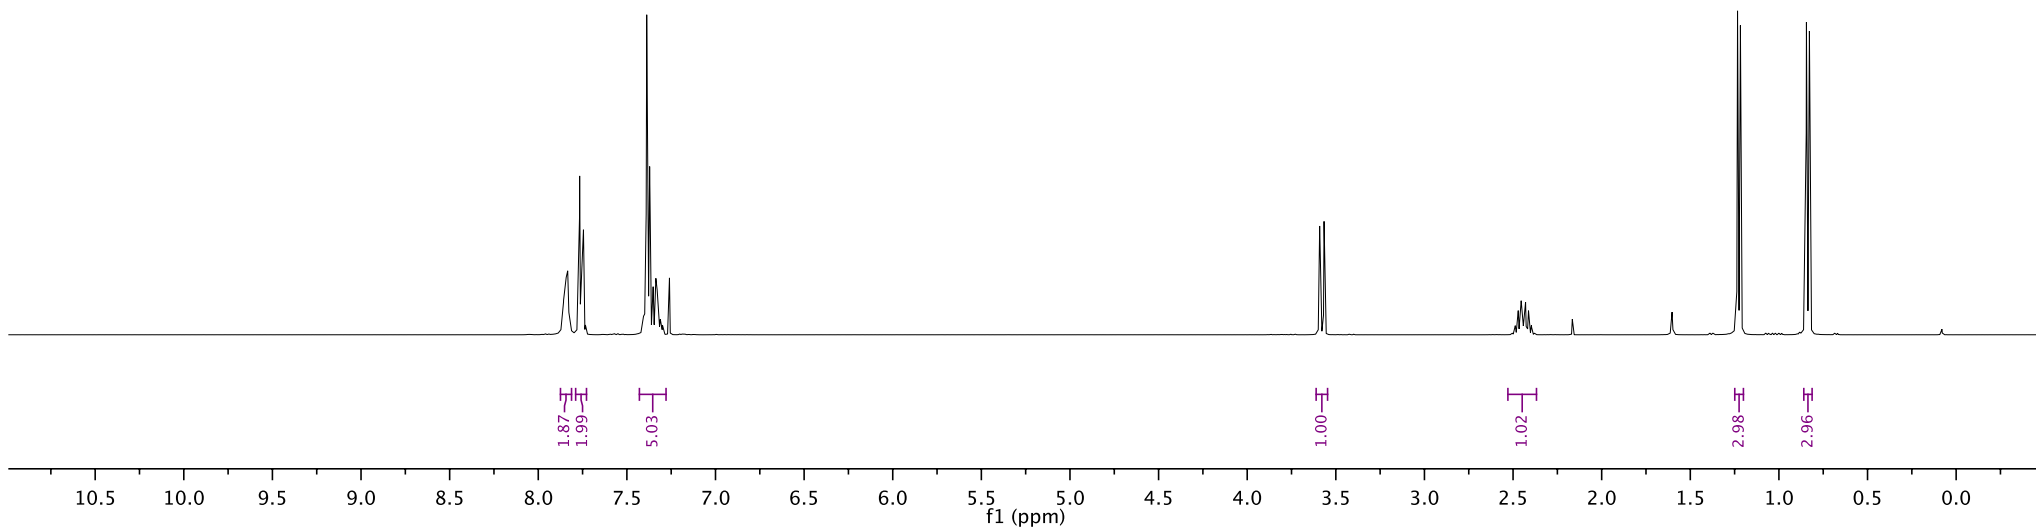

| Parameter              | Value               |
|------------------------|---------------------|
| Title                  | NAO-01-186-A.2.fid  |
| Origin                 | Bruker BioSpin GmbH |
| Solvent                | CDCl3               |
| Temperature            | 294.9               |
| Pulse Sequence         | zgpg30              |
| Number of Scans        | 128                 |
| Receiver Gain          | 78.7                |
| Relaxation Delay       | 2.0000              |
| Pulse Width            | 10.0000             |
| Acquisition Time       | 1.3631              |
| Acquisition Date       | 2016-08-18T05:55:35 |
| Spectrometer Frequency | 100.62              |
| Spectral Width         | 24038.5             |
| Lowest Frequency       | -1939.0             |
| Nucleus                | <sup>13</sup> C     |
| Acquired Size          | 32768               |
| Spectral Size          | 65536               |

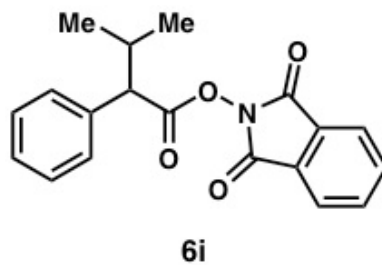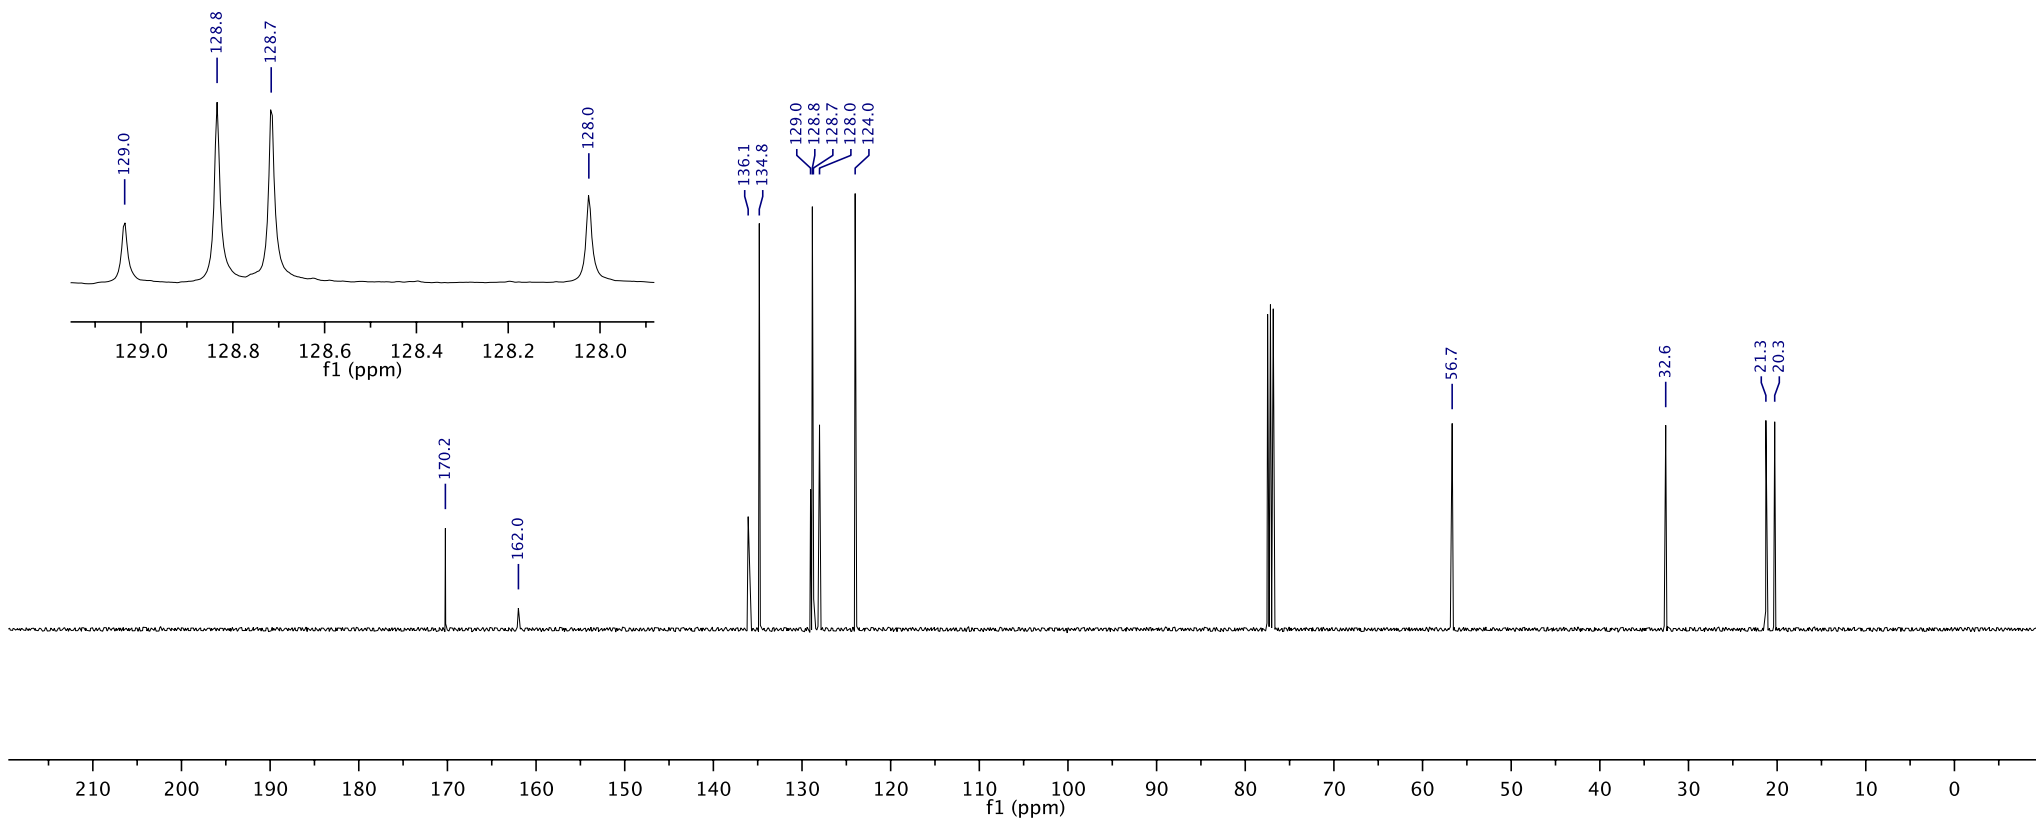

| Parameter              | Value               |
|------------------------|---------------------|
| Title                  | JLH-5-143.1.fid     |
| Origin                 | Bruker BioSpin GmbH |
| Solvent                | CDCl3               |
| Temperature            | 295.0               |
| Pulse Sequence         | zg30                |
| Number of Scans        | 16                  |
| Receiver Gain          | 30.3                |
| Relaxation Delay       | 1.0000              |
| Pulse Width            | 11.7000             |
| Acquisition Time       | 4.0894              |
| Acquisition Date       | 2016-08-18T03:51:09 |
| Spectrometer Frequency | 400.13              |
| Spectral Width         | 8012.8              |
| Lowest Frequency       | -1555.6             |
| Nucleus                | 1H                  |
| Acquired Size          | 32768               |
| Spectral Size          | 65536               |

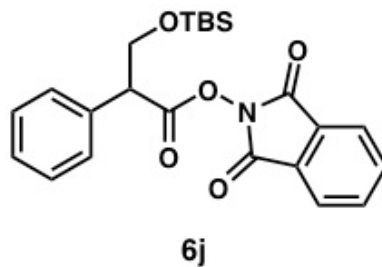

|        |      |        |      |       |      |
|--------|------|--------|------|-------|------|
| B (dd) | 7.77 | E (dd) | 3.93 | H (s) | 0.03 |
| A (dd) | 7.86 | C (m)  | 7.37 | D (m) | 4.23 |
|        |      |        |      | F (s) | 0.89 |
|        |      |        |      | G (s) | 0.05 |

S132

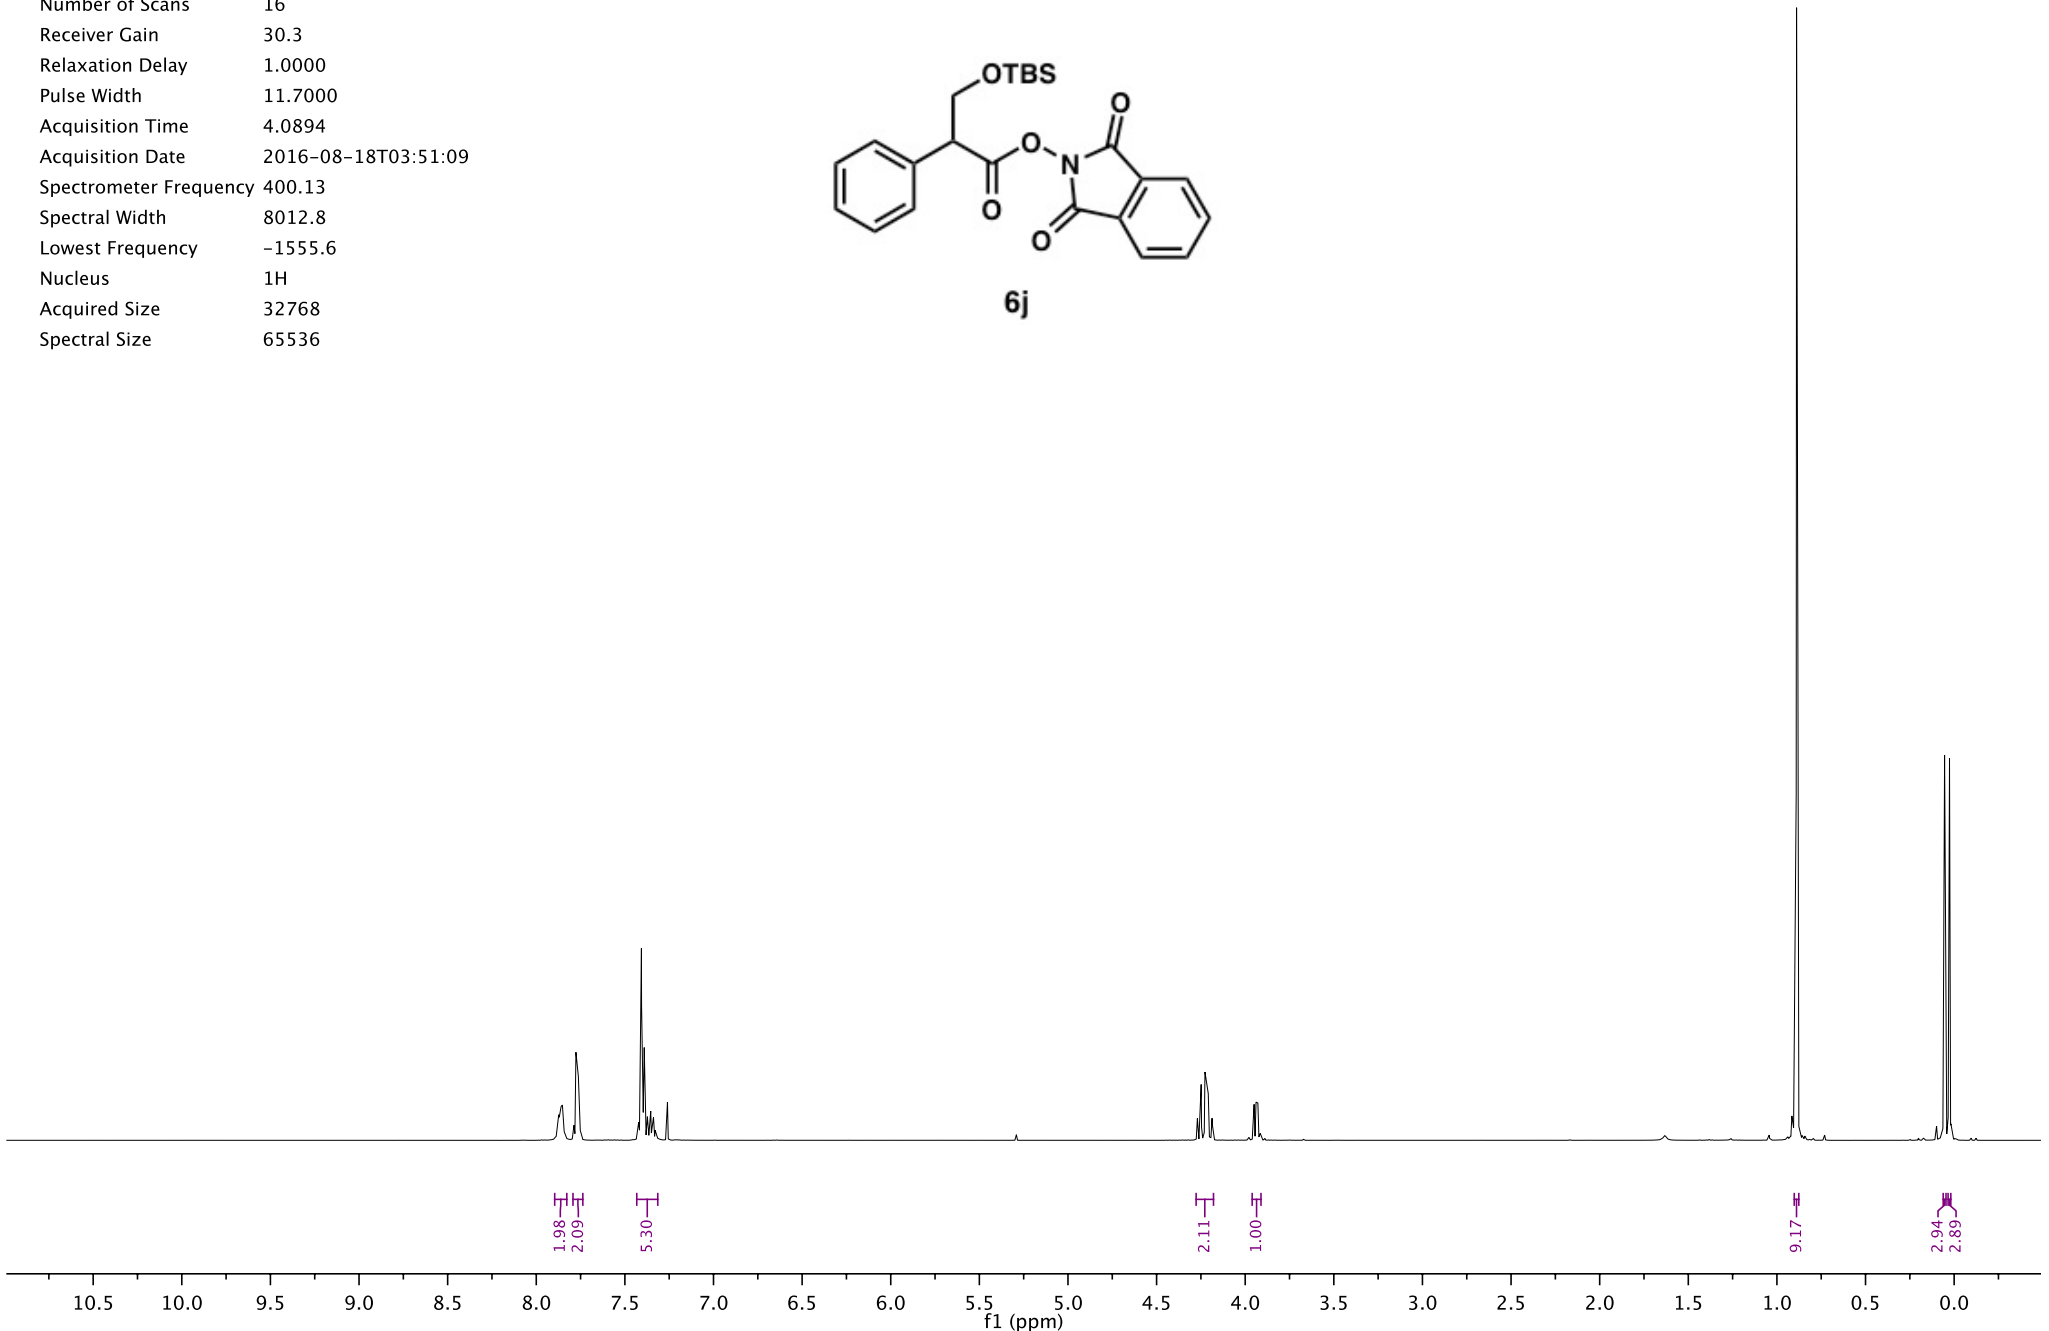



| Parameter              | Value               |
|------------------------|---------------------|
| Title                  | JLH-5-143.2.fid     |
| Origin                 | Bruker BioSpin GmbH |
| Solvent                | CDCl3               |
| Temperature            | 295.0               |
| Pulse Sequence         | zgpg30              |
| Number of Scans        | 128                 |
| Receiver Gain          | 72.0                |
| Relaxation Delay       | 2.0000              |
| Pulse Width            | 10.0000             |
| Acquisition Time       | 1.3631              |
| Acquisition Date       | 2016-08-18T03:59:00 |
| Spectrometer Frequency | 100.62              |
| Spectral Width         | 24038.5             |
| Lowest Frequency       | -1937.0             |
| Nucleus                | <sup>13</sup> C     |
| Acquired Size          | 32768               |
| Spectral Size          | 65536               |

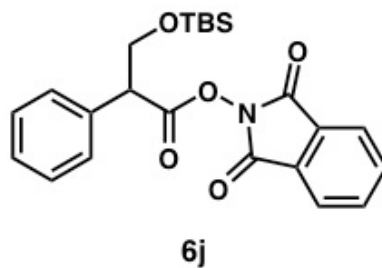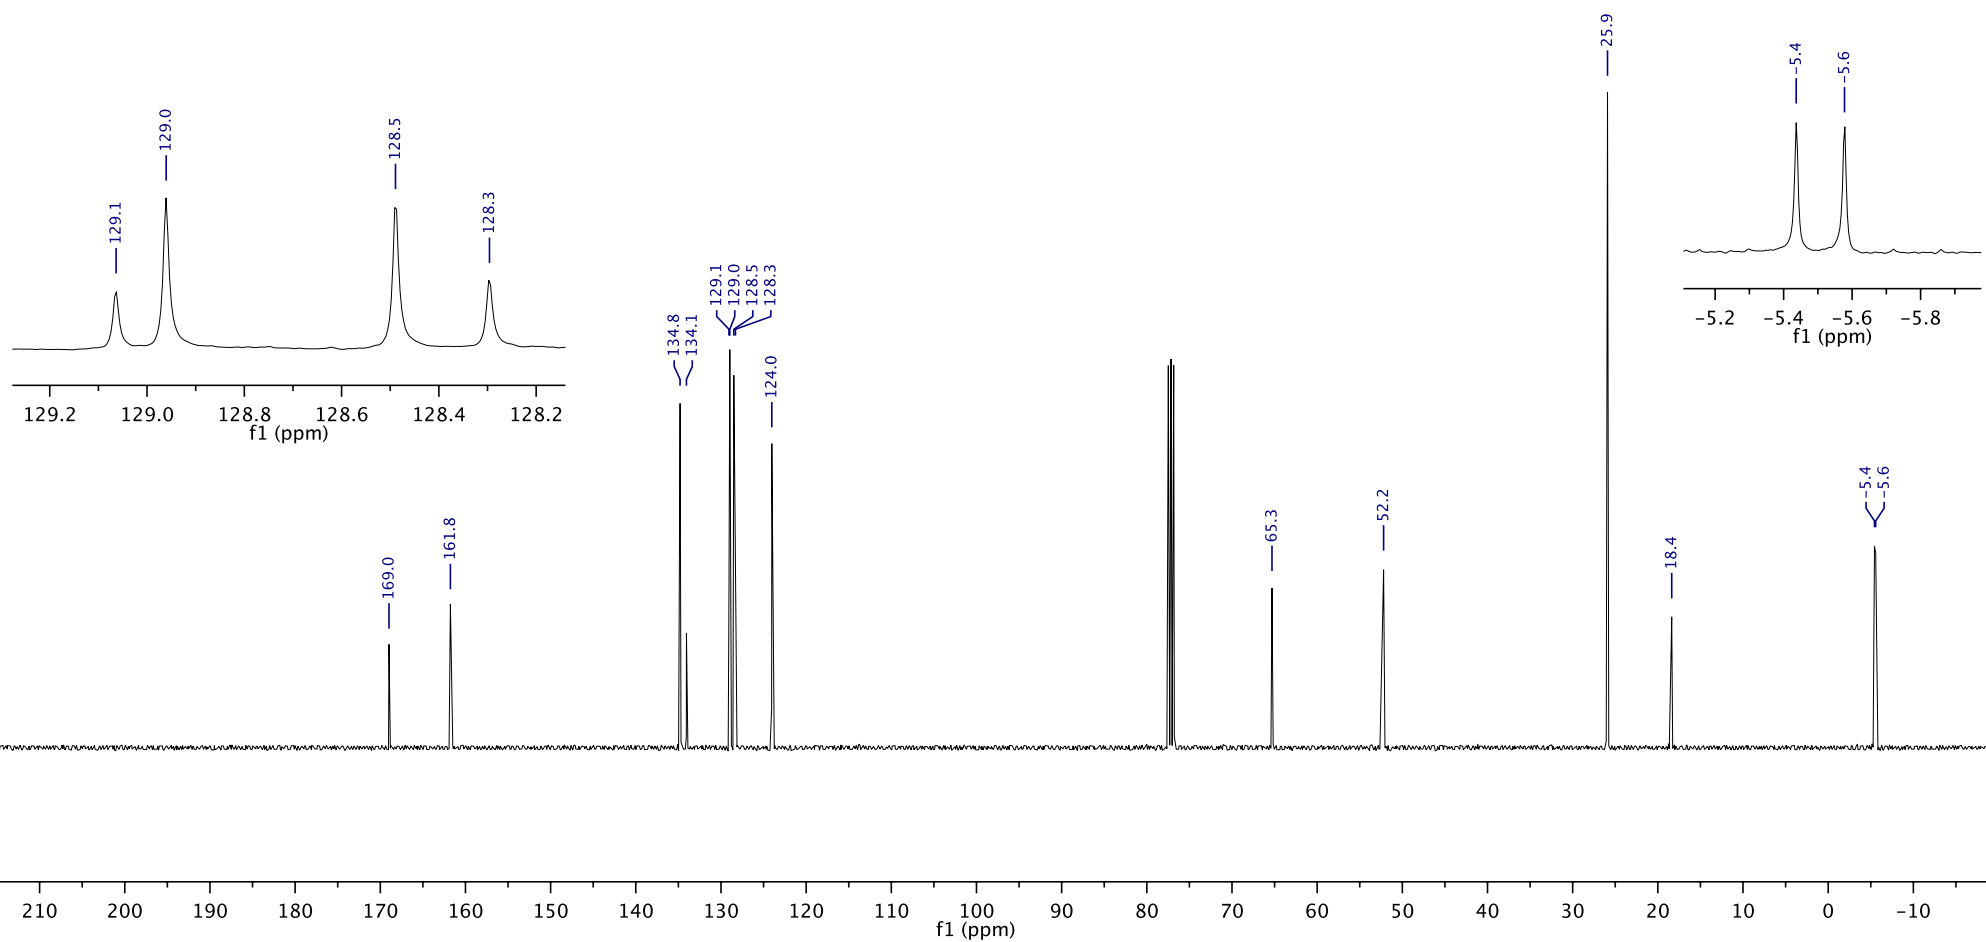

| Parameter              | Value               |
|------------------------|---------------------|
| Title                  | NAO-01-211-A.1.fid  |
| Origin                 | Bruker BioSpin GmbH |
| Solvent                | CDCl3               |
| Temperature            | 294.9               |
| Pulse Sequence         | zg30                |
| Number of Scans        | 16                  |
| Receiver Gain          | 64.2                |
| Relaxation Delay       | 1.0000              |
| Pulse Width            | 11.7000             |
| Acquisition Time       | 4.0894              |
| Acquisition Date       | 2016-08-19T22:04:00 |
| Spectrometer Frequency | 400.13              |
| Spectral Width         | 8012.8              |
| Lowest Frequency       | -1555.6             |
| Nucleus                | <sup>1</sup> H      |
| Acquired Size          | 32768               |
| Spectral Size          | 65536               |

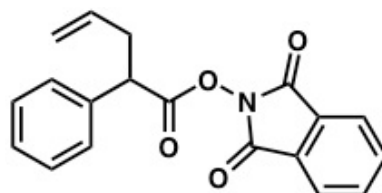

6k

B (dd)  
7.76F (m)  
5.12I (dtt)  
2.68A (dd)  
7.85C (m)  
7.37D (ddt)  
5.81E (dq)  
5.16G (dd)  
4.04H (m)  
2.95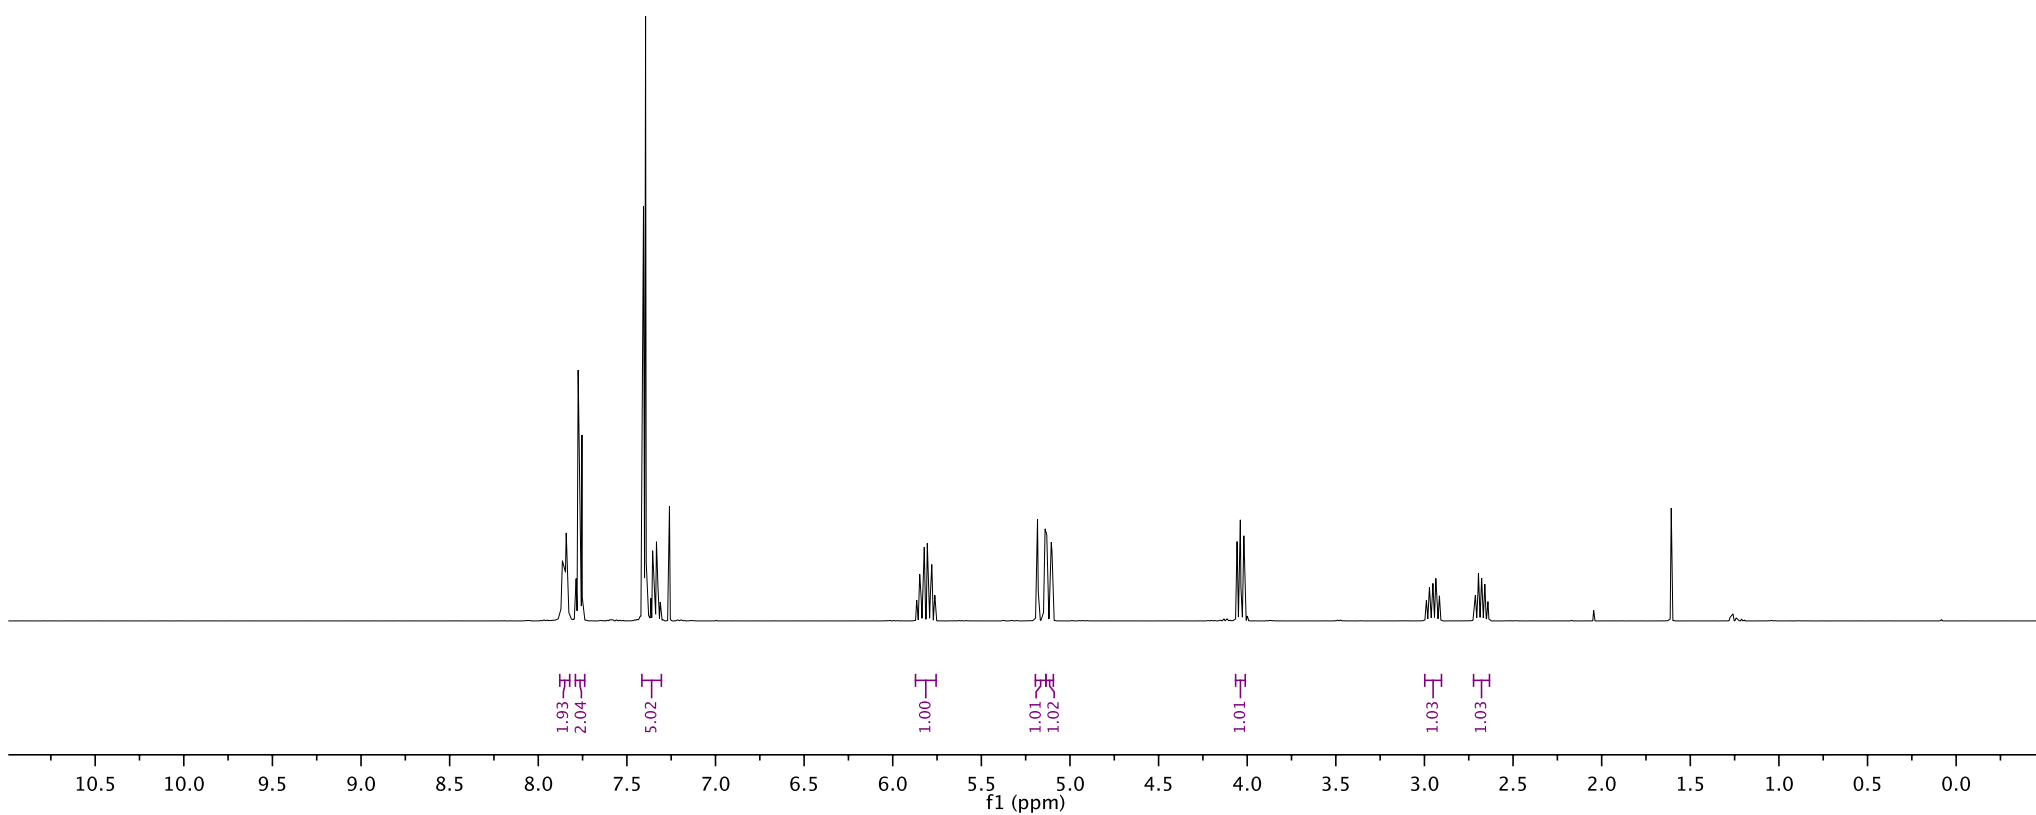

| Parameter              | Value               |
|------------------------|---------------------|
| Title                  | NAO-01-211-A.2.fid  |
| Origin                 | Bruker BioSpin GmbH |
| Solvent                | CDCl3               |
| Temperature            | 295.0               |
| Pulse Sequence         | zgpg30              |
| Number of Scans        | 128                 |
| Receiver Gain          | 78.7                |
| Relaxation Delay       | 2.0000              |
| Pulse Width            | 10.0000             |
| Acquisition Time       | 1.3631              |
| Acquisition Date       | 2016-08-19T22:11:57 |
| Spectrometer Frequency | 100.62              |
| Spectral Width         | 24038.5             |
| Lowest Frequency       | -1940.1             |
| Nucleus                | <sup>13</sup> C     |
| Acquired Size          | 32768               |
| Spectral Size          | 65536               |

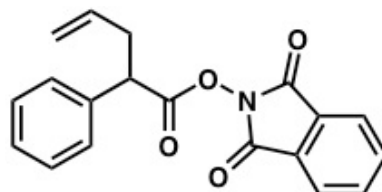

6k

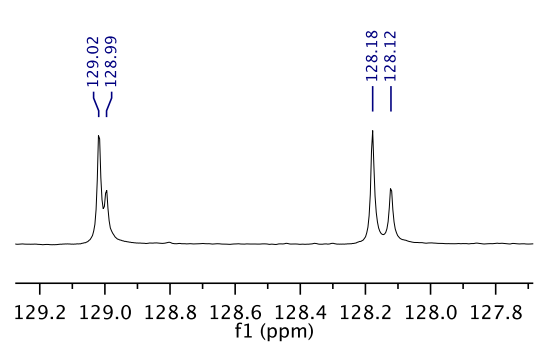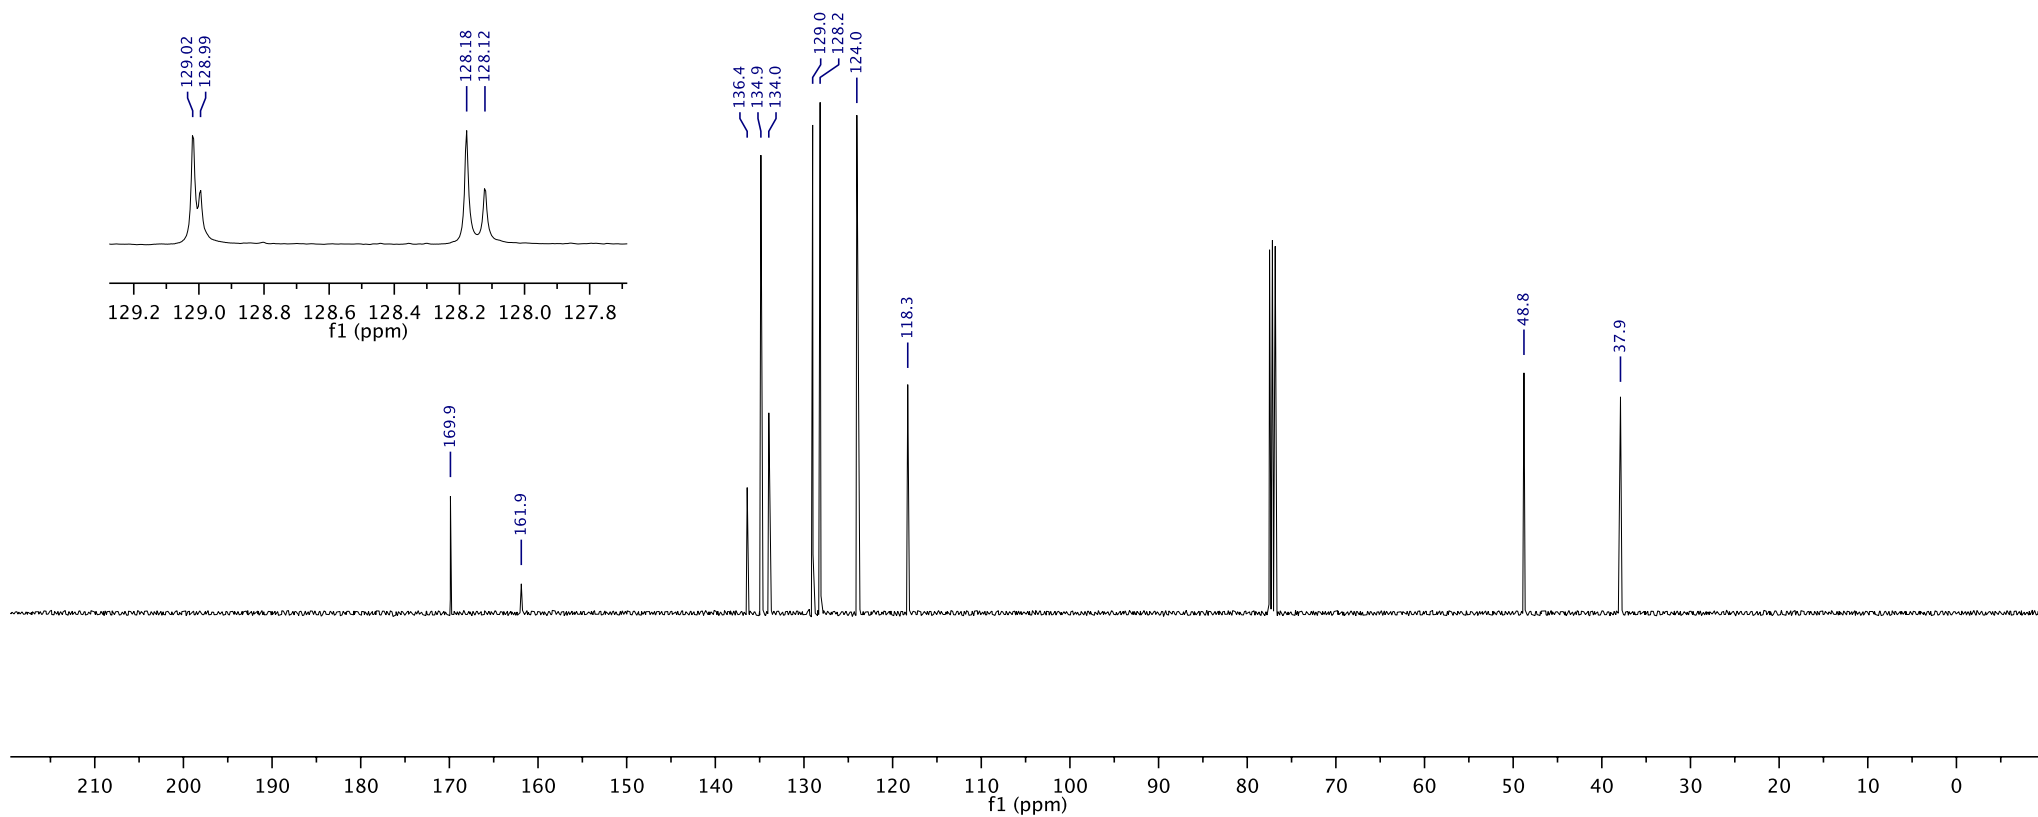

| Parameter              | Value                |
|------------------------|----------------------|
| Title                  | JLH-5-166-plug.1.fid |
| Origin                 | Bruker BioSpin GmbH  |
| Solvent                | CDCl3                |
| Temperature            | 294.9                |
| Pulse Sequence         | zg30                 |
| Number of Scans        | 16                   |
| Receiver Gain          | 64.2                 |
| Relaxation Delay       | 1.0000               |
| Pulse Width            | 11.7000              |
| Acquisition Time       | 4.0894               |
| Acquisition Date       | 2016-08-26T19:36:29  |
| Spectrometer Frequency | 400.13               |
| Spectral Width         | 8012.8               |
| Lowest Frequency       | -1555.6              |
| Nucleus                | <sup>1</sup> H       |
| Acquired Size          | 32768                |
| Spectral Size          | 65536                |

B (dd)  
7.77

A (dd)  
7.85

C (m)  
7.37

D (t)  
3.97

E (m)  
3.58

G (dddd)  
2.13

F (dddd)  
2.34

H (m)  
1.91

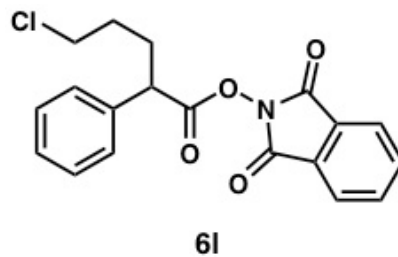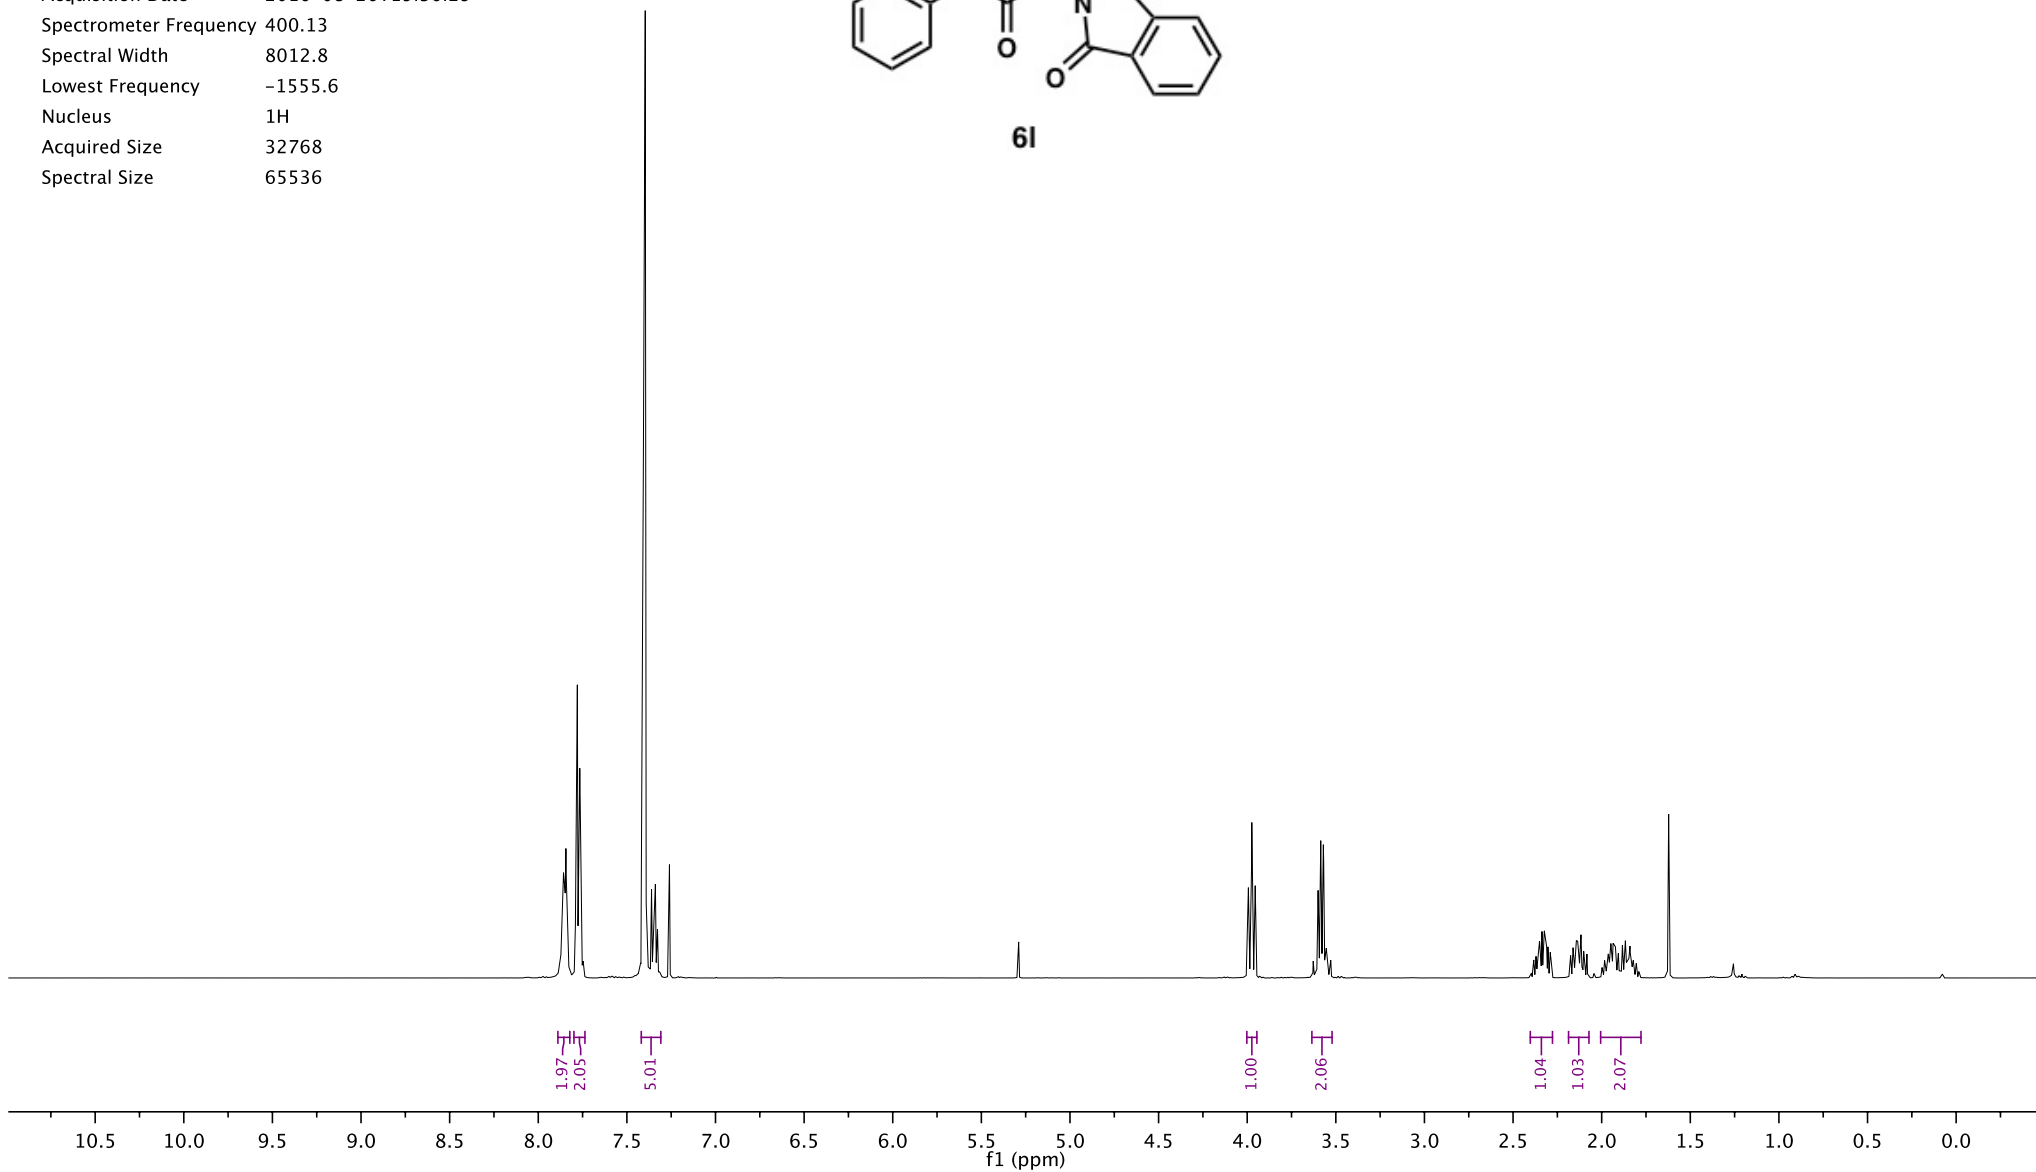

| Parameter              | Value                |
|------------------------|----------------------|
| Title                  | JLH-5-166-plug.2.fid |
| Origin                 | Bruker BioSpin GmbH  |
| Solvent                | CDCl3                |
| Temperature            | 295.0                |
| Pulse Sequence         | zgpg30               |
| Number of Scans        | 128                  |
| Receiver Gain          | 87.8                 |
| Relaxation Delay       | 2.0000               |
| Pulse Width            | 10.0000              |
| Acquisition Time       | 1.3631               |
| Acquisition Date       | 2016-08-26T19:44:19  |
| Spectrometer Frequency | 100.62               |
| Spectral Width         | 24038.5              |
| Lowest Frequency       | -1940.8              |
| Nucleus                | 13C                  |
| Acquired Size          | 32768                |
| Spectral Size          | 65536                |

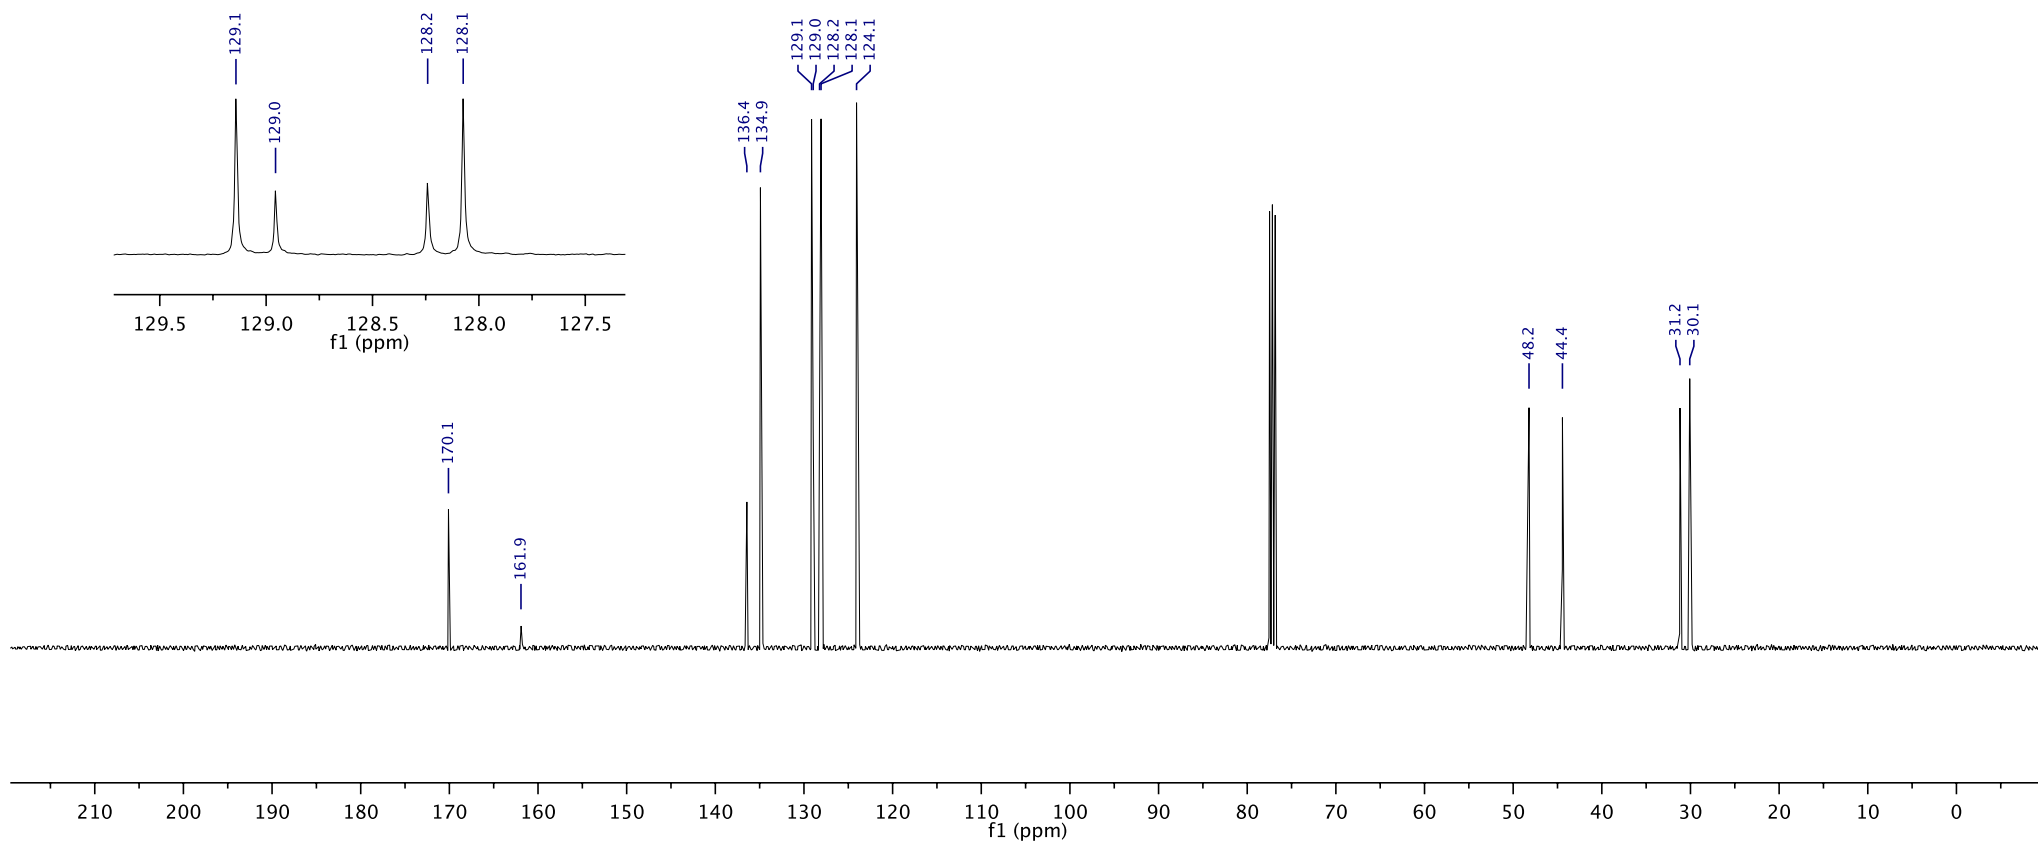

| Parameter              | Value               |
|------------------------|---------------------|
| Title                  | JLH-5-154-F2.1.fid  |
| Origin                 | Bruker BioSpin GmbH |
| Solvent                | CDCl3               |
| Temperature            | 295.0               |
| Pulse Sequence         | zg30                |
| Number of Scans        | 16                  |
| Receiver Gain          | 30.3                |
| Relaxation Delay       | 1.0000              |
| Pulse Width            | 11.7000             |
| Acquisition Time       | 4.0894              |
| Acquisition Date       | 2016-08-24T06:35:31 |
| Spectrometer Frequency | 400.13              |
| Spectral Width         | 8012.8              |
| Lowest Frequency       | -1535.6             |
| Nucleus                | 1H                  |
| Acquired Size          | 32768               |
| Spectral Size          | 65536               |

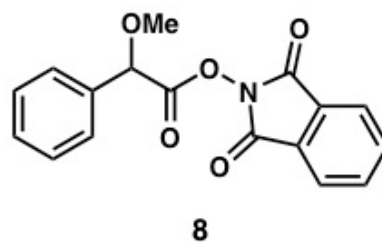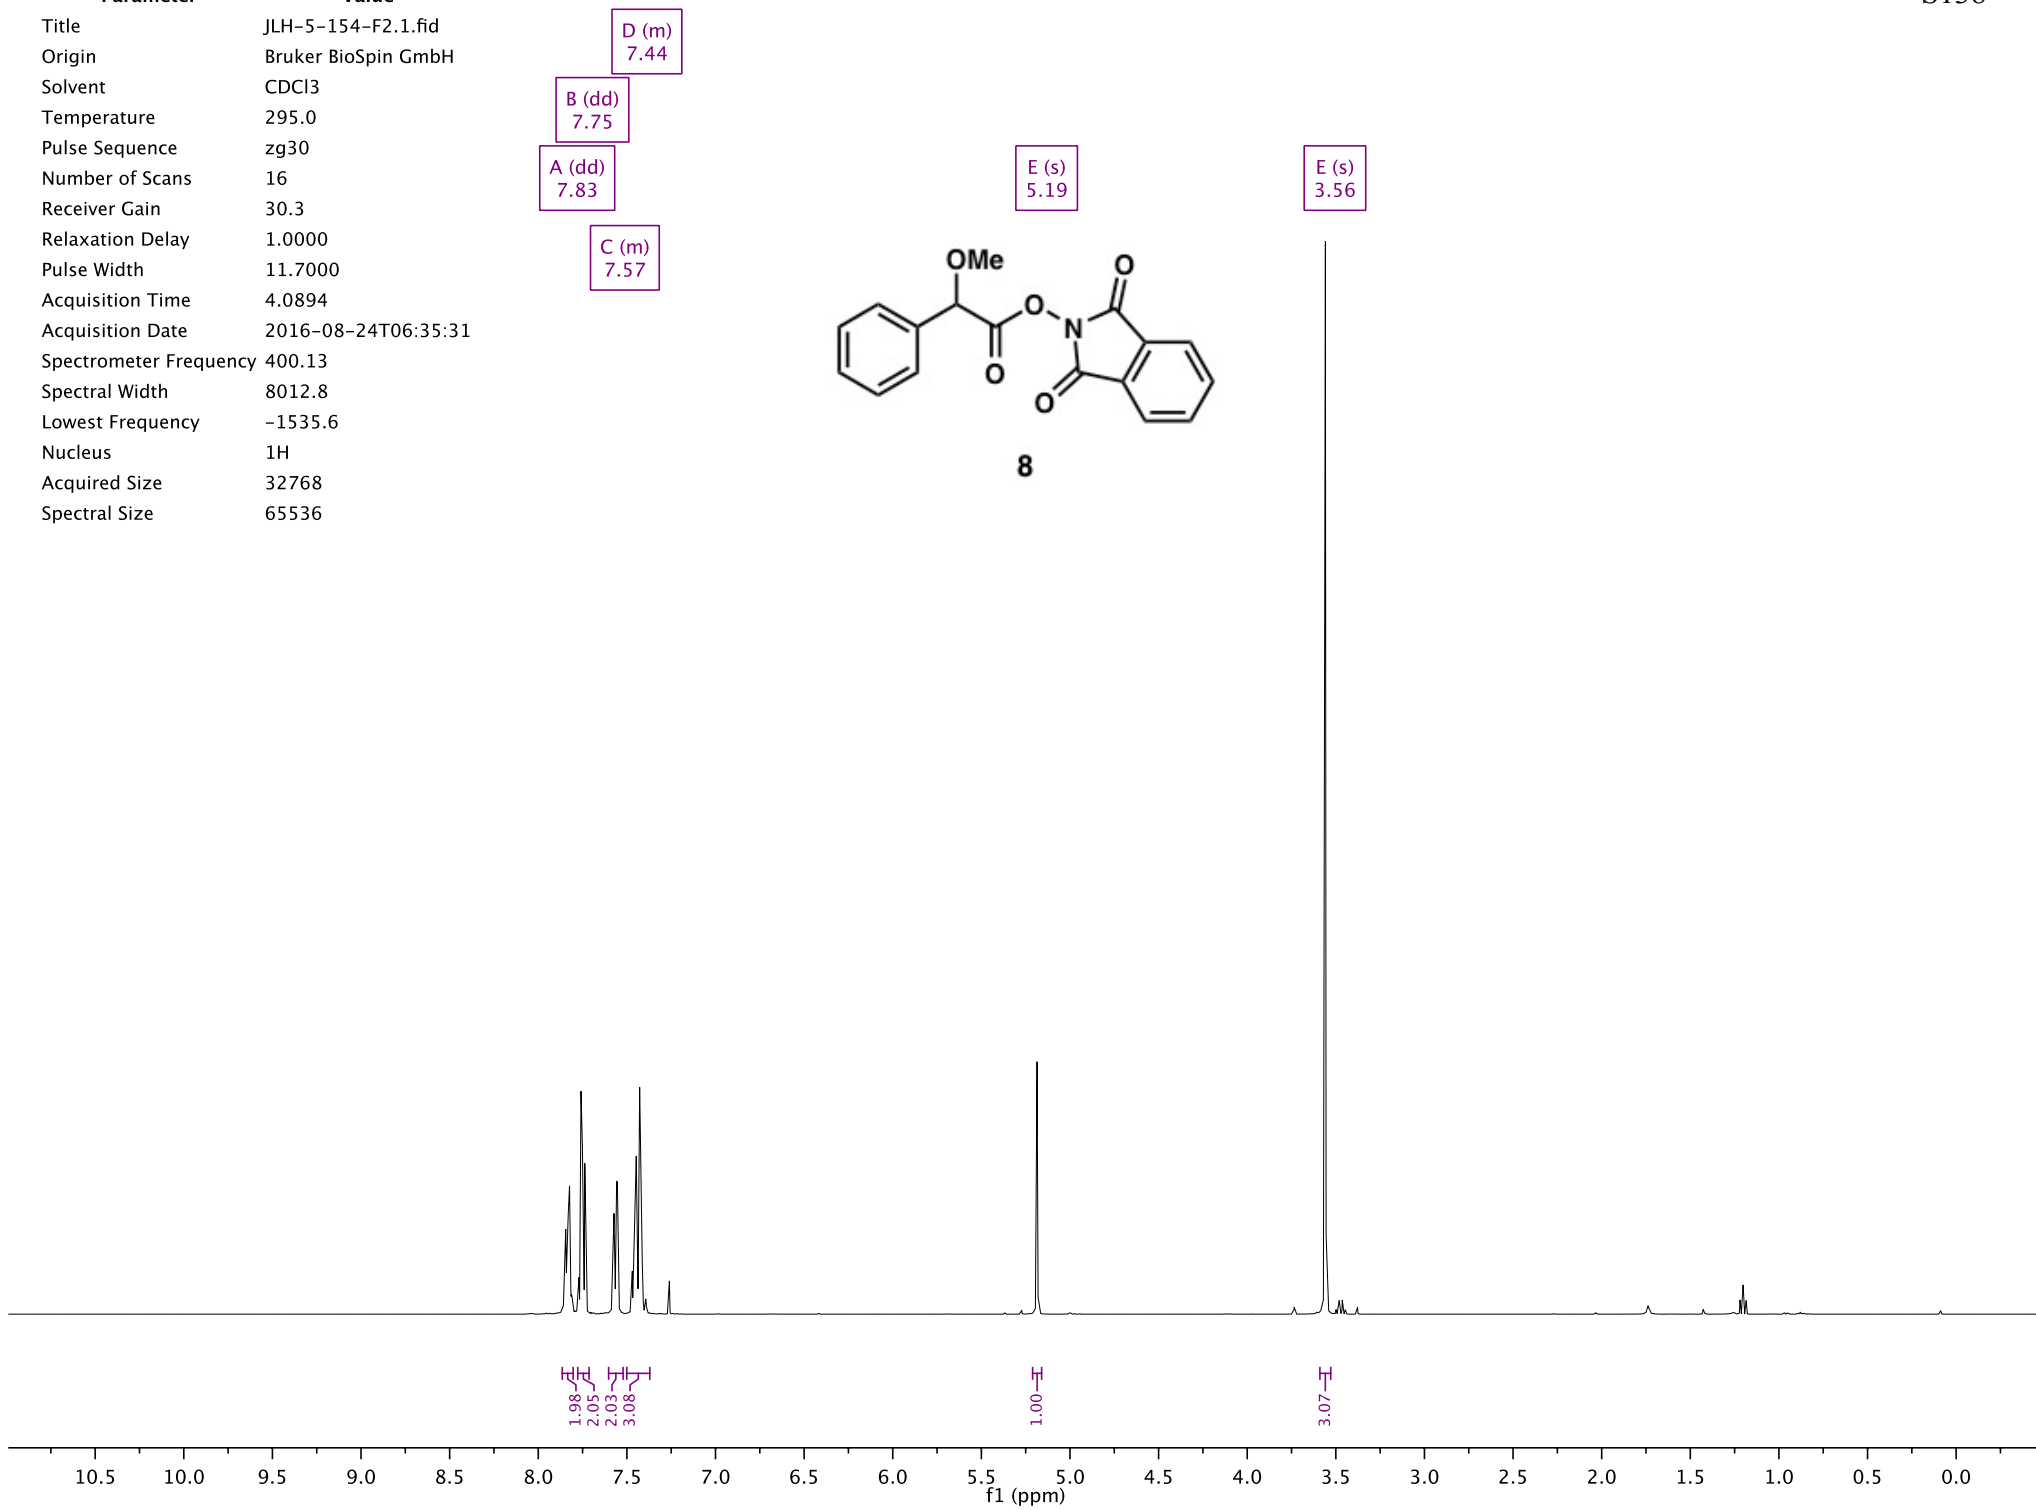

| Parameter              | Value               |
|------------------------|---------------------|
| Title                  | JLH-5-154-F2.2.fid  |
| Origin                 | Bruker BioSpin GmbH |
| Solvent                | CDCl3               |
| Temperature            | 295.0               |
| Pulse Sequence         | zgpg30              |
| Number of Scans        | 128                 |
| Receiver Gain          | 78.7                |
| Relaxation Delay       | 2.0000              |
| Pulse Width            | 10.0000             |
| Acquisition Time       | 1.3631              |
| Acquisition Date       | 2016-08-24T06:43:59 |
| Spectrometer Frequency | 100.62              |
| Spectral Width         | 24038.5             |
| Lowest Frequency       | -1951.5             |
| Nucleus                | <sup>13</sup> C     |
| Acquired Size          | 32768               |
| Spectral Size          | 65536               |

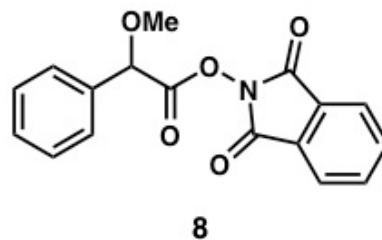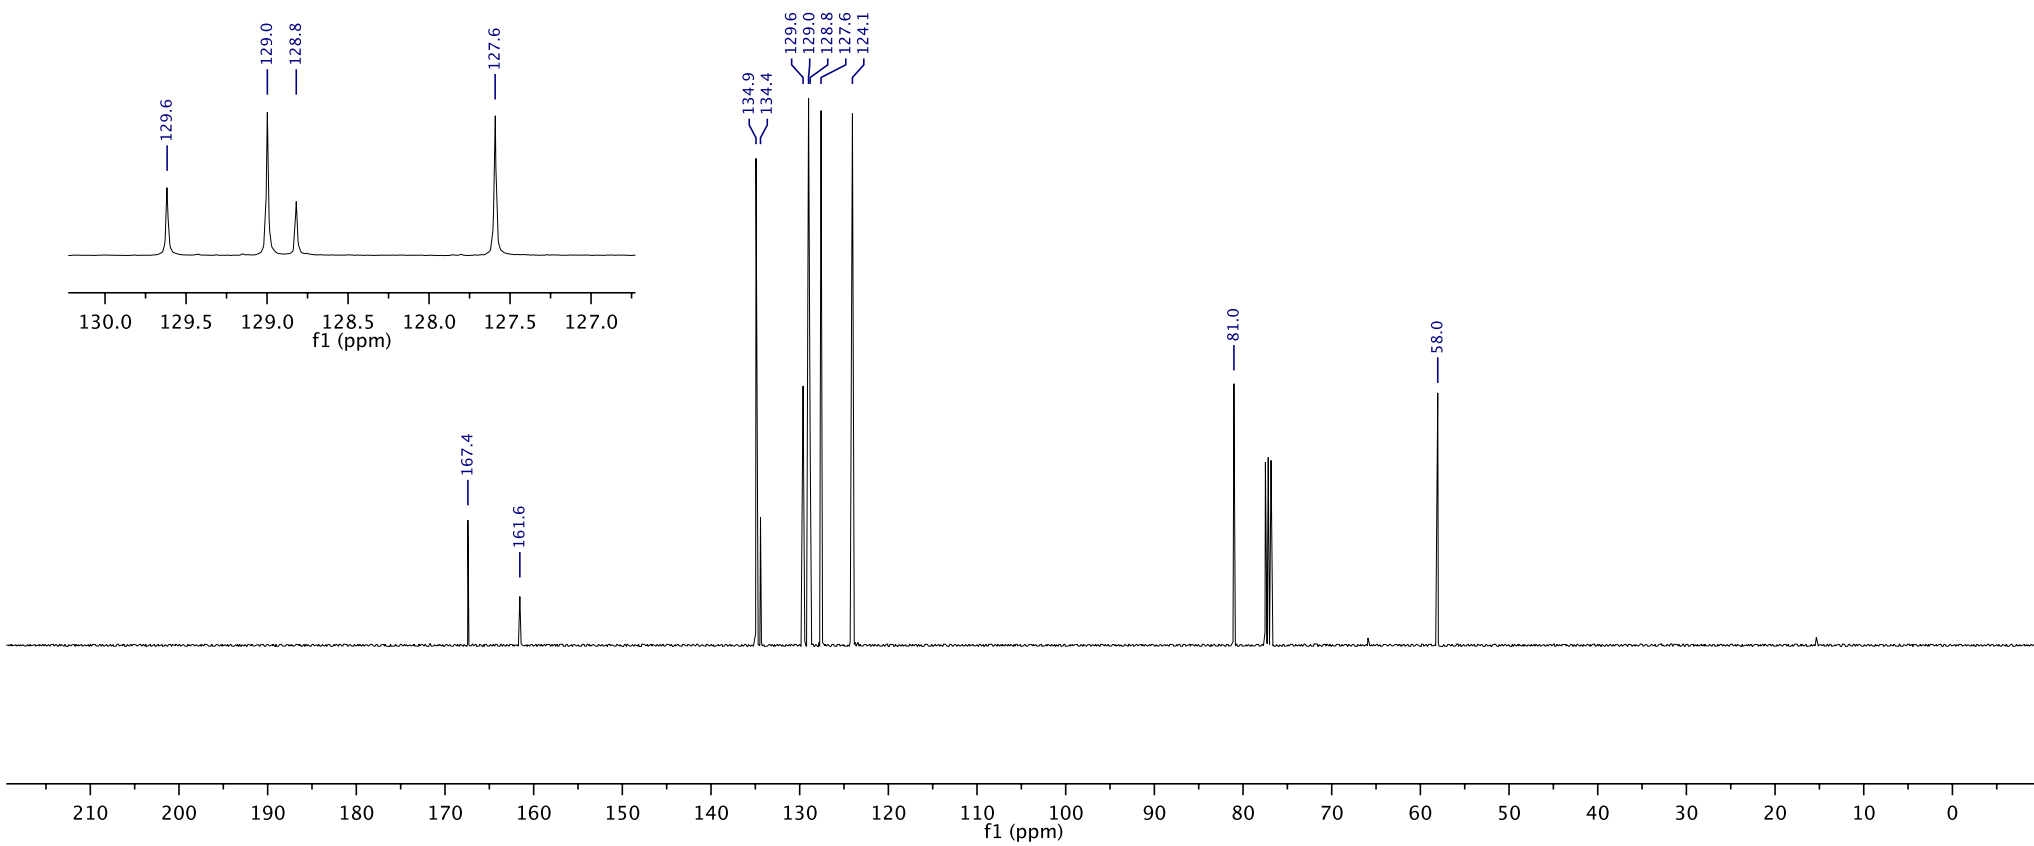

| Parameter              | Value                 |
|------------------------|-----------------------|
| Title                  | NAO-01-241-A-03.1.fid |
| Origin                 | Bruker BioSpin GmbH   |
| Solvent                | CDCl3                 |
| Temperature            | 295.0                 |
| Pulse Sequence         | zg30                  |
| Number of Scans        | 16                    |
| Receiver Gain          | 112.8                 |
| Relaxation Delay       | 1.0000                |
| Pulse Width            | 11.7000               |
| Acquisition Time       | 4.0894                |
| Acquisition Date       | 2016-09-15T04:42:26   |
| Spectrometer Frequency | 400.13                |
| Spectral Width         | 8012.8                |
| Lowest Frequency       | -1555.6               |
| Nucleus                | 1H                    |
| Acquired Size          | 32768                 |
| Spectral Size          | 65536                 |

B (m)  
7.78

E (m)  
7.35

A (dd)  
7.87

D (m)  
7.41

C (m)  
7.47

F (d)  
3.29

G (dt)  
1.53

H (dddd)  
0.82

J (m)  
0.60

I (m)  
0.70

K (m)  
0.39

S140

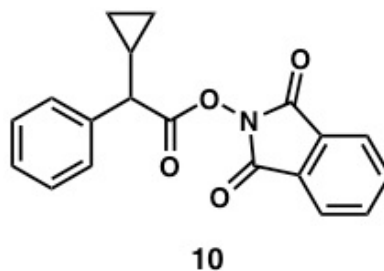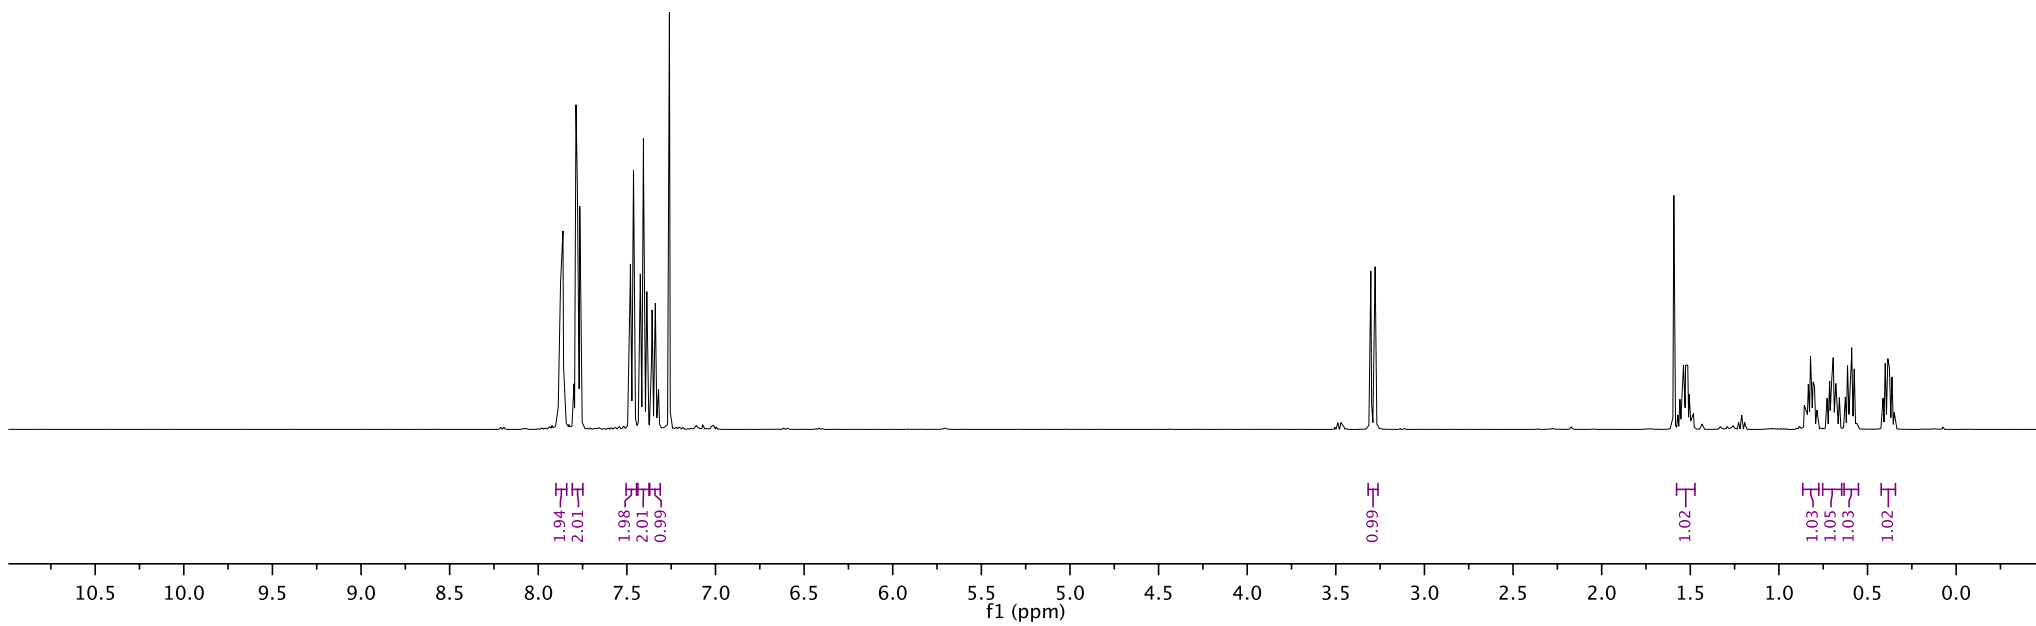



| Parameter              | Value                 |
|------------------------|-----------------------|
| Title                  | NAO-01-241-A-03.2.fid |
| Origin                 | Bruker BioSpin GmbH   |
| Solvent                | CDCl3                 |
| Temperature            | 294.9                 |
| Pulse Sequence         | zgpg30                |
| Number of Scans        | 128                   |
| Receiver Gain          | 78.7                  |
| Relaxation Delay       | 2.0000                |
| Pulse Width            | 10.0000               |
| Acquisition Time       | 1.3631                |
| Acquisition Date       | 2016-09-15T04:50:24   |
| Spectrometer Frequency | 100.62                |
| Spectral Width         | 24038.5               |
| Lowest Frequency       | -1936.3               |
| Nucleus                | <sup>13</sup> C       |
| Acquired Size          | 32768                 |
| Spectral Size          | 65536                 |

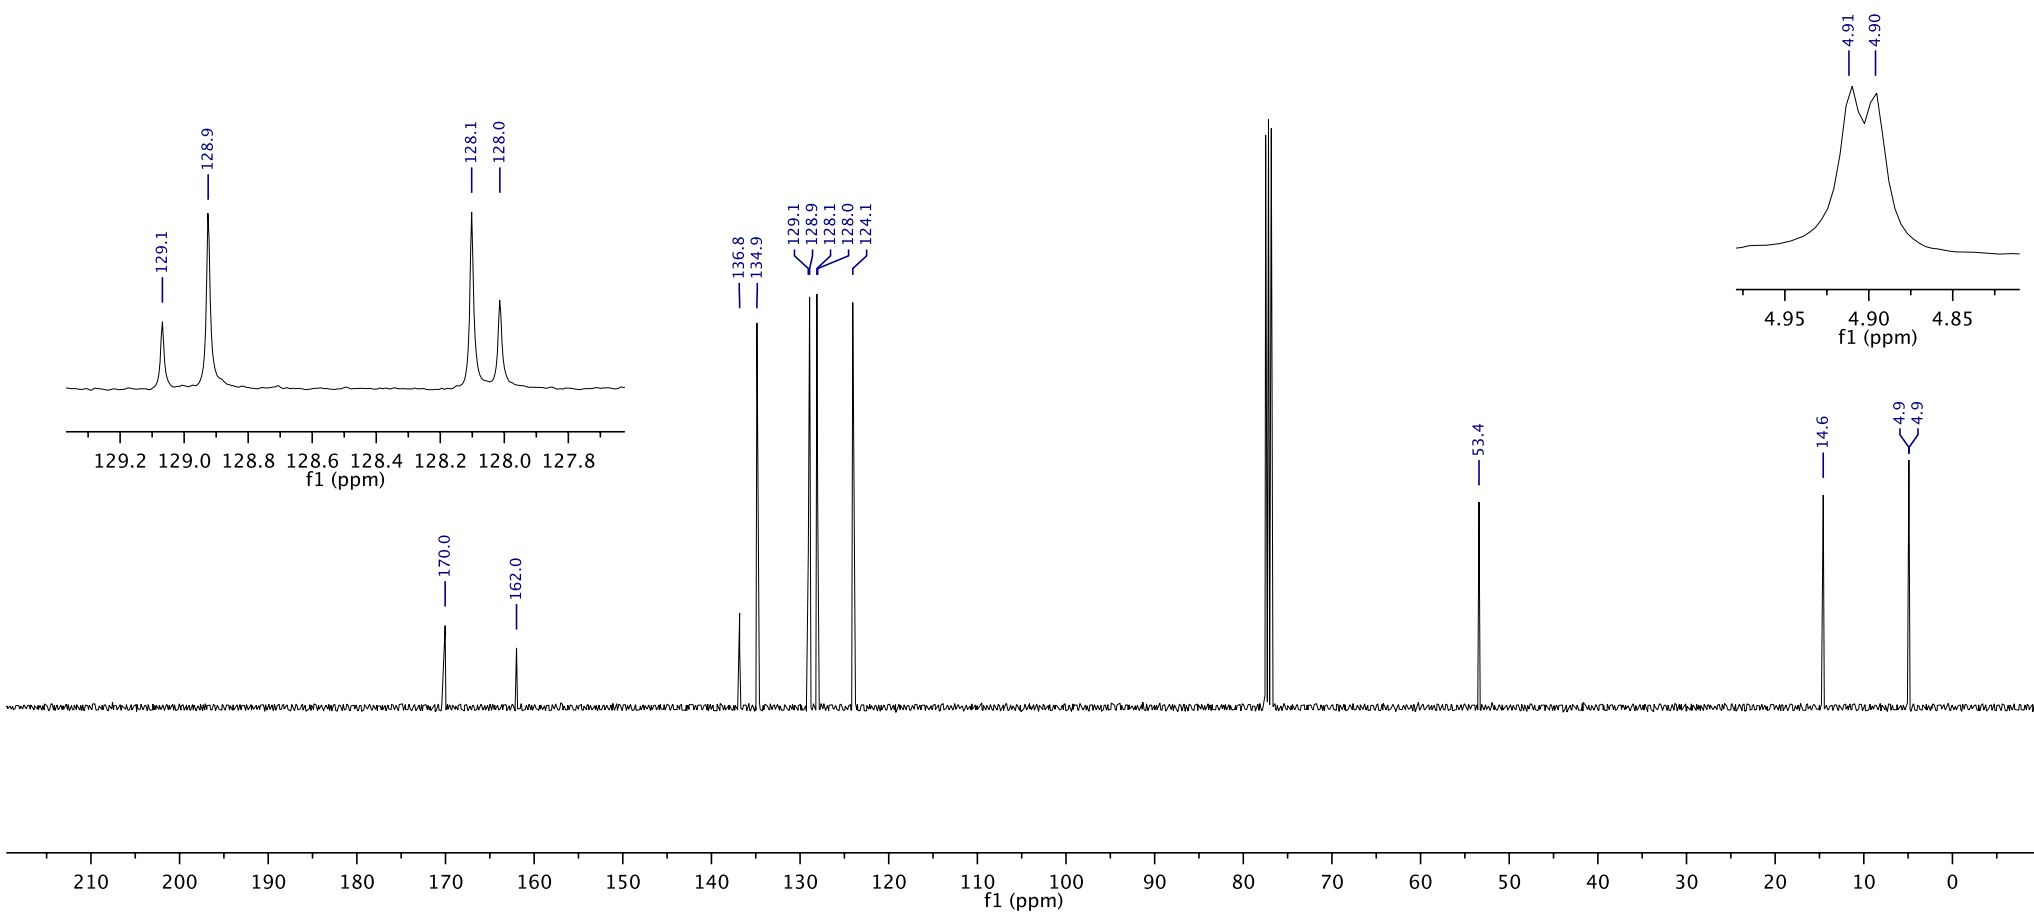

| Parameter              | Value                   |
|------------------------|-------------------------|
| Title                  | JLH-6-039-plug-CH.1.fid |
| Origin                 | Bruker BioSpin GmbH     |
| Solvent                | CDCl3                   |
| Temperature            | 295.0                   |
| Pulse Sequence         | zg30                    |
| Number of Scans        | 16                      |
| Receiver Gain          | 78.7                    |
| Relaxation Delay       | 1.0000                  |
| Pulse Width            | 11.7000                 |
| Acquisition Time       | 4.0894                  |
| Acquisition Date       | 2017-01-05T15:37:27     |
| Spectrometer Frequency | 400.13                  |
| Spectral Width         | 8012.8                  |
| Lowest Frequency       | -1535.6                 |
| Nucleus                | 1H                      |
| Acquired Size          | 32768                   |
| Spectral Size          | 65536                   |

D (m)  
7.31B (m)  
7.46A (m)  
7.70E (m)  
6.98C (s)  
7.41F (s)  
2.45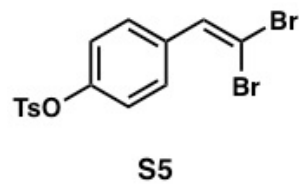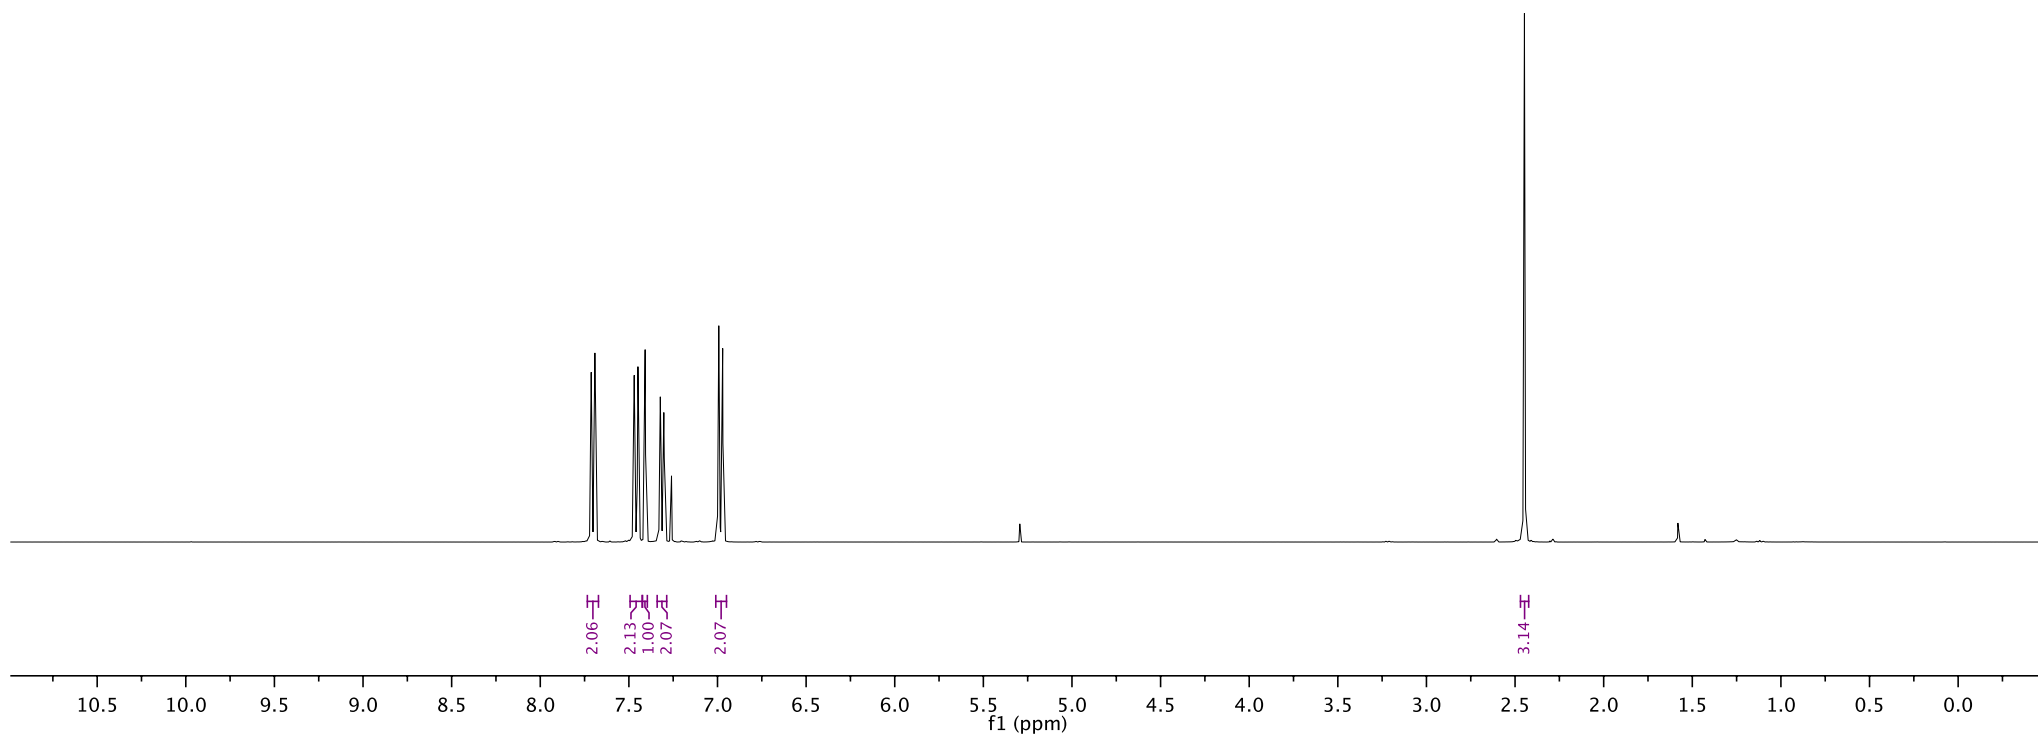

| Parameter              | Value                   |
|------------------------|-------------------------|
| Title                  | JLH-6-039-plug-CH.2.fid |
| Origin                 | Bruker BioSpin GmbH     |
| Solvent                | CDCl3                   |
| Temperature            | 294.9                   |
| Pulse Sequence         | zgpg30                  |
| Number of Scans        | 128                     |
| Receiver Gain          | 72.0                    |
| Relaxation Delay       | 2.0000                  |
| Pulse Width            | 10.0000                 |
| Acquisition Time       | 1.3631                  |
| Acquisition Date       | 2017-01-05T15:45:24     |
| Spectrometer Frequency | 100.62                  |
| Spectral Width         | 24038.5                 |
| Lowest Frequency       | -1958.4                 |
| Nucleus                | <sup>13</sup> C         |
| Acquired Size          | 32768                   |
| Spectral Size          | 65536                   |

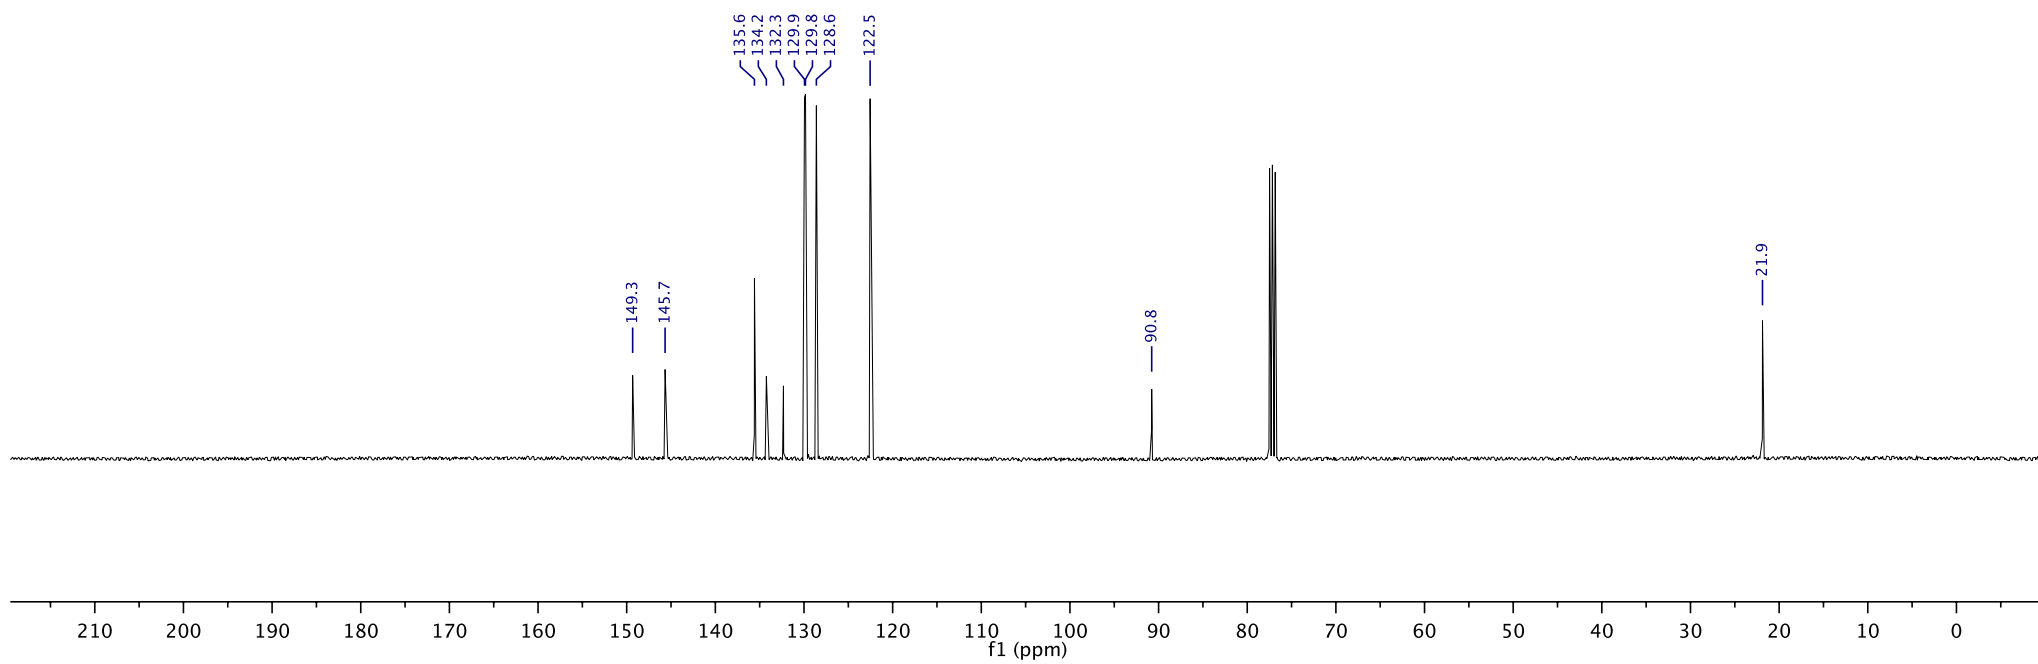

| Parameter              | Value               |
|------------------------|---------------------|
| Title                  | JLH-3-095-column-CH |
| Origin                 | Varian              |
| Solvent                | "cdcl3"             |
| Temperature            | 25.0                |
| Pulse Sequence         | s2pul               |
| Number of Scans        | 8                   |
| Receiver Gain          | 32                  |
| Relaxation Delay       | 1.0000              |
| Pulse Width            | 5.9000              |
| Acquisition Time       | 3.0000              |
| Acquisition Date       | 2016-04-23T16:02:14 |
| Spectrometer Frequency | 499.66              |
| Spectral Width         | 8000.0              |
| Lowest Frequency       | -1026.1             |
| Nucleus                | <sup>1</sup> H      |
| Acquired Size          | 24000               |
| Spectral Size          | 65536               |

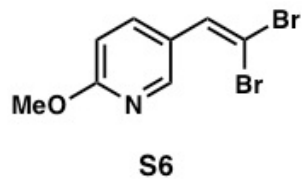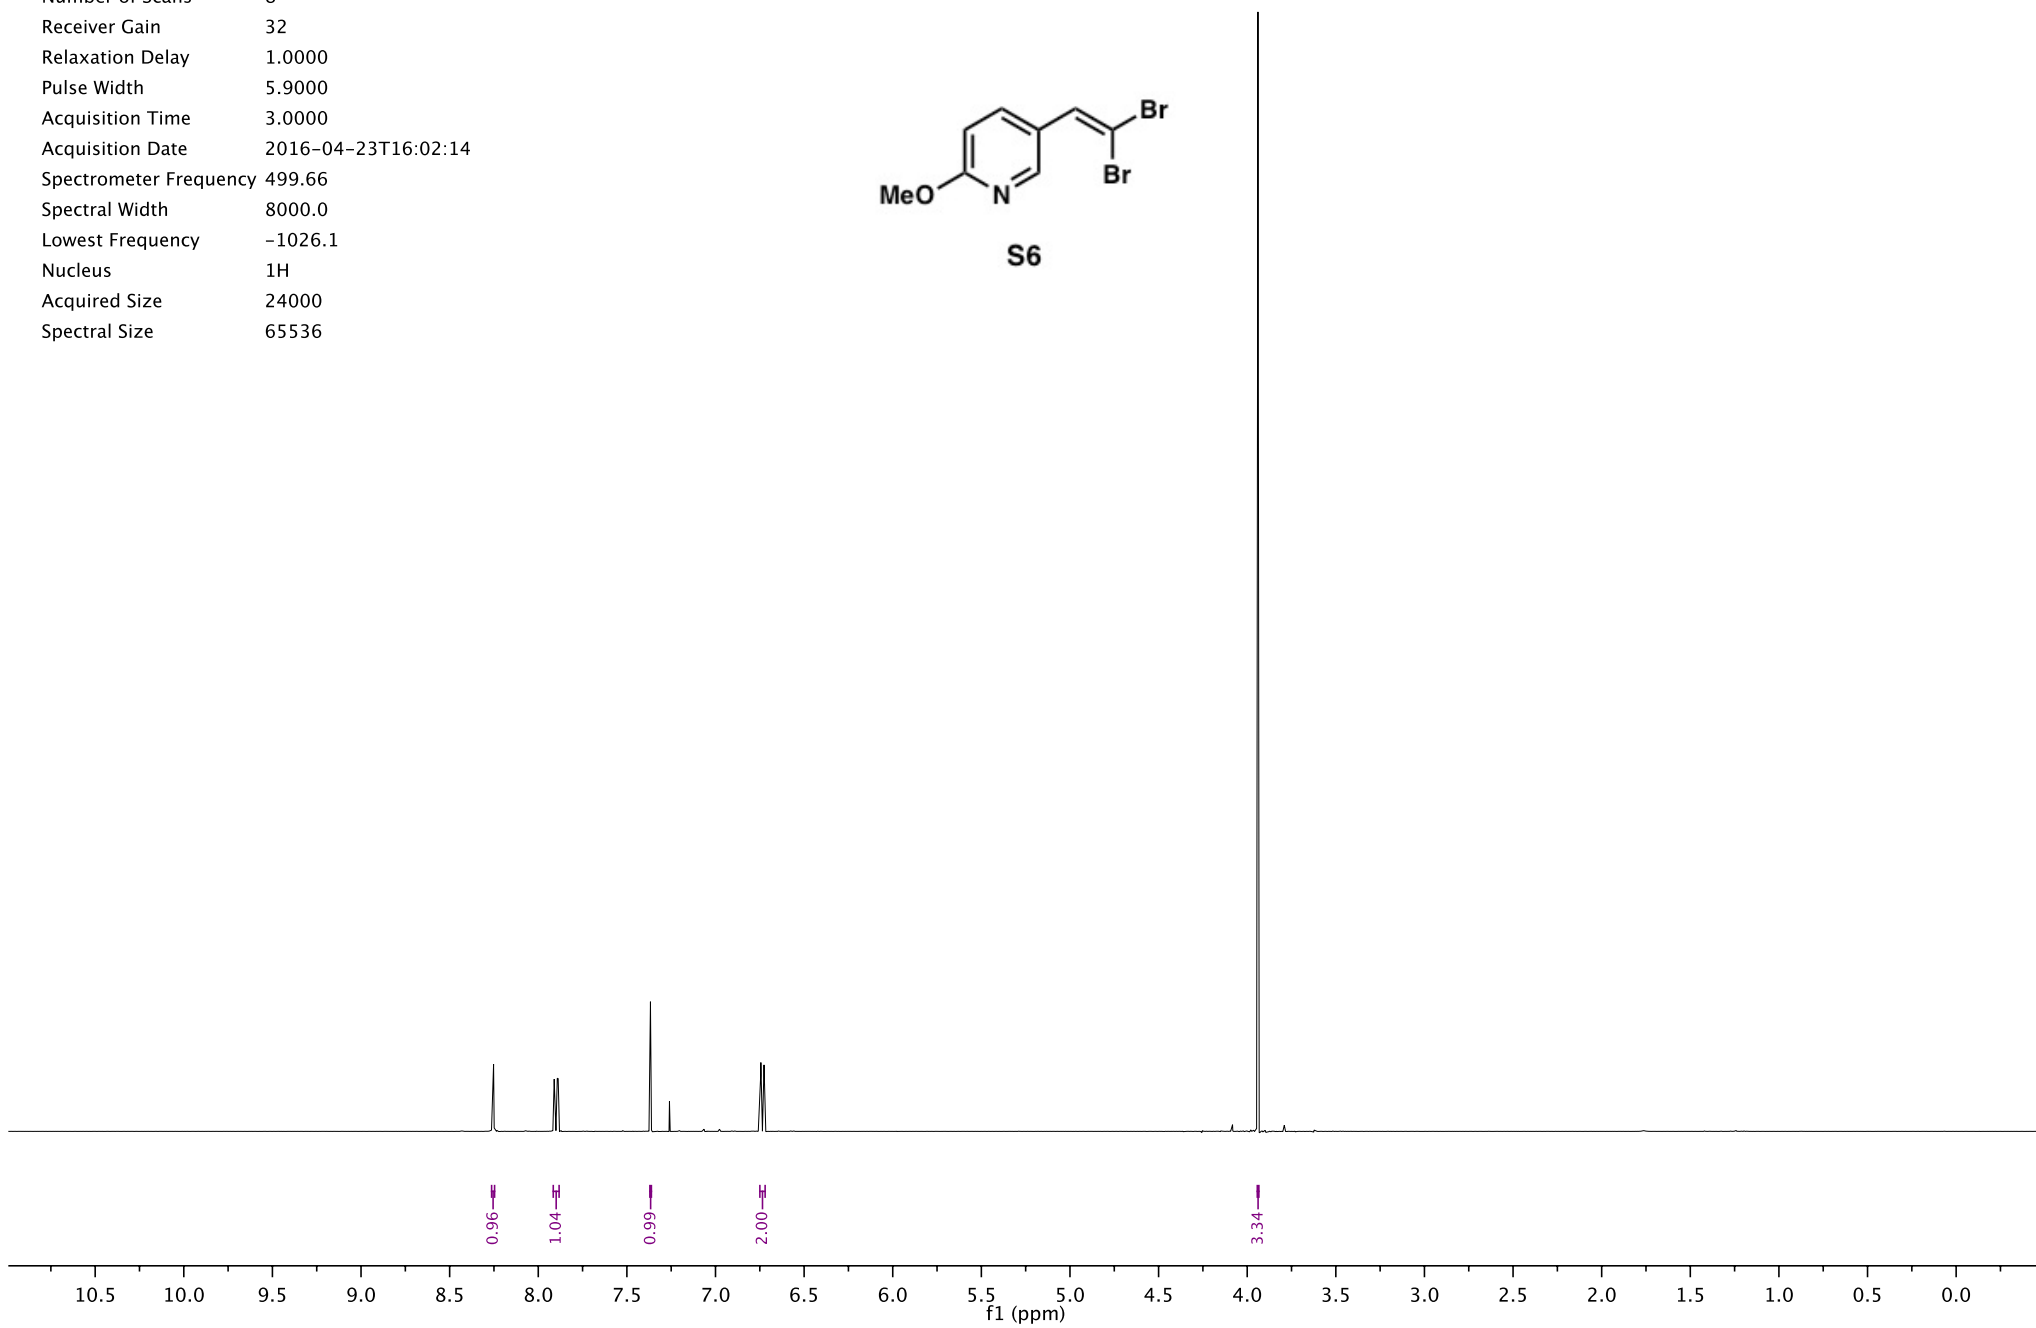

| Parameter              | Value               |
|------------------------|---------------------|
| Title                  | JLH-3-095-column-CH |
| Origin                 | Varian              |
| Solvent                | "cdcl3"             |
| Temperature            | 25.0                |
| Pulse Sequence         | s2pul               |
| Number of Scans        | 256                 |
| Receiver Gain          | 30                  |
| Relaxation Delay       | 1.0000              |
| Pulse Width            | 4.5000              |
| Acquisition Time       | 1.0420              |
| Acquisition Date       | 2016-04-23T16:03:02 |
| Spectrometer Frequency | 125.65              |
| Spectral Width         | 31446.5             |
| Lowest Frequency       | -1874.1             |
| Nucleus                | <sup>13</sup> C     |
| Acquired Size          | 32768               |
| Spectral Size          | 65536               |

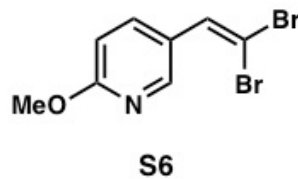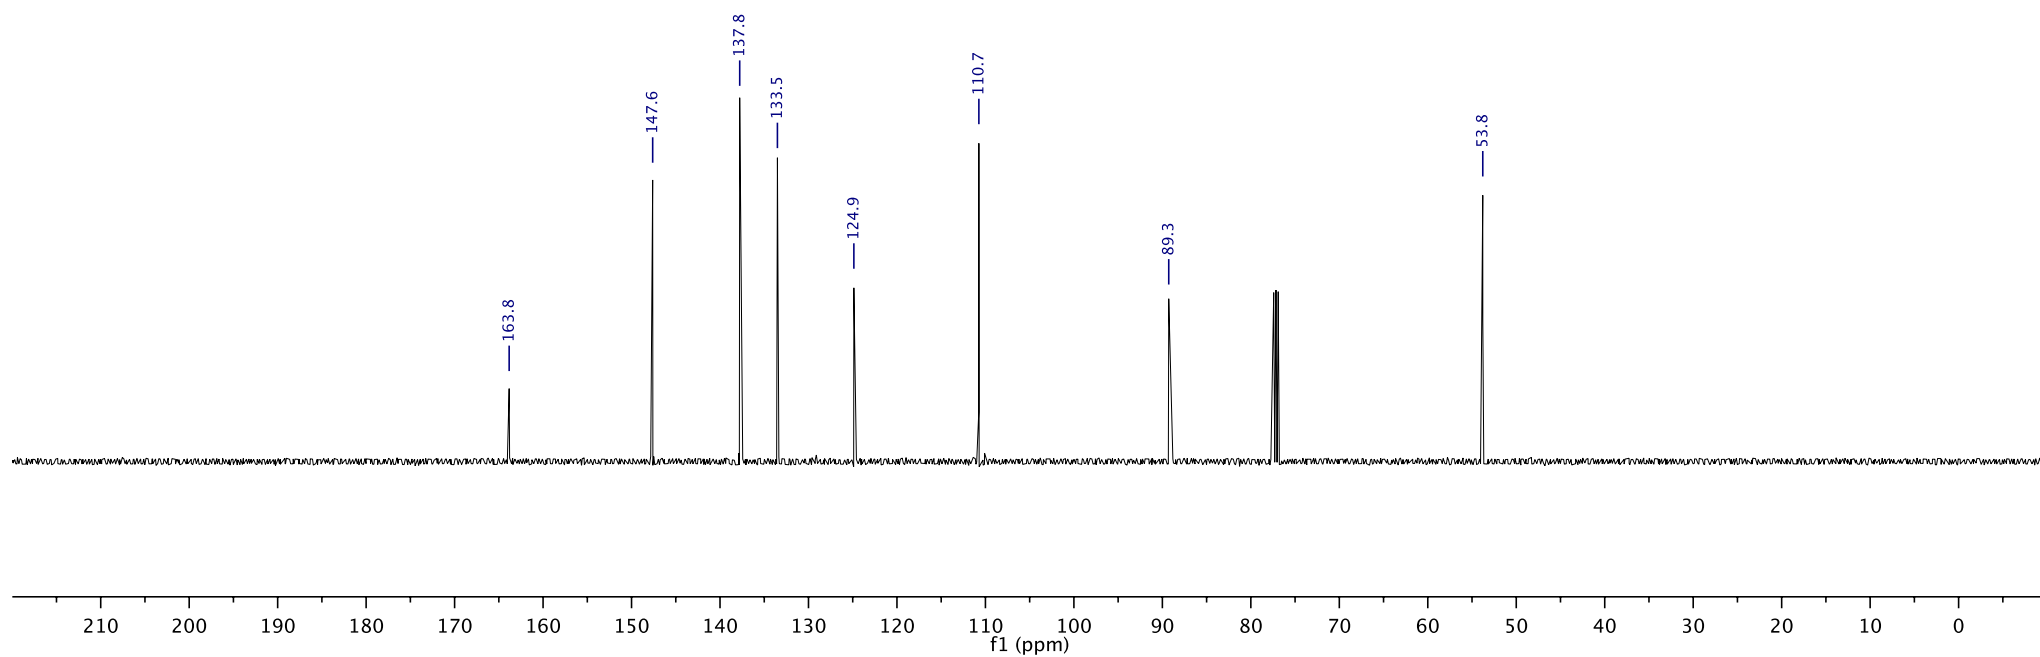

| Parameter              | Value               |
|------------------------|---------------------|
| Title                  | AHC-7-91-2-CH.1.fid |
| Origin                 | Bruker BioSpin GmbH |
| Solvent                | CDCl3               |
| Temperature            | 294.9               |
| Pulse Sequence         | zg30                |
| Number of Scans        | 16                  |
| Receiver Gain          | 64.2                |
| Relaxation Delay       | 1.0000              |
| Pulse Width            | 11.7000             |
| Acquisition Time       | 4.0894              |
| Acquisition Date       | 2017-01-05T15:49:57 |
| Spectrometer Frequency | 400.13              |
| Spectral Width         | 8012.8              |
| Lowest Frequency       | -1535.6             |
| Nucleus                | <sup>1</sup> H      |
| Acquired Size          | 32768               |
| Spectral Size          | 65536               |

|       |       |       |
|-------|-------|-------|
| B (m) | E (m) |       |
| 7.31  | 6.93  |       |
| A (m) | C (m) | F (d) |
| 7.69  | 7.20  | 6.73  |
| D (d) |       |       |
| 7.03  |       |       |
| G (s) |       |       |
| 2.44  |       |       |

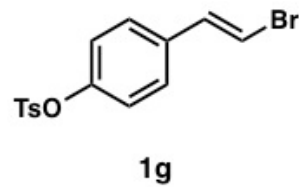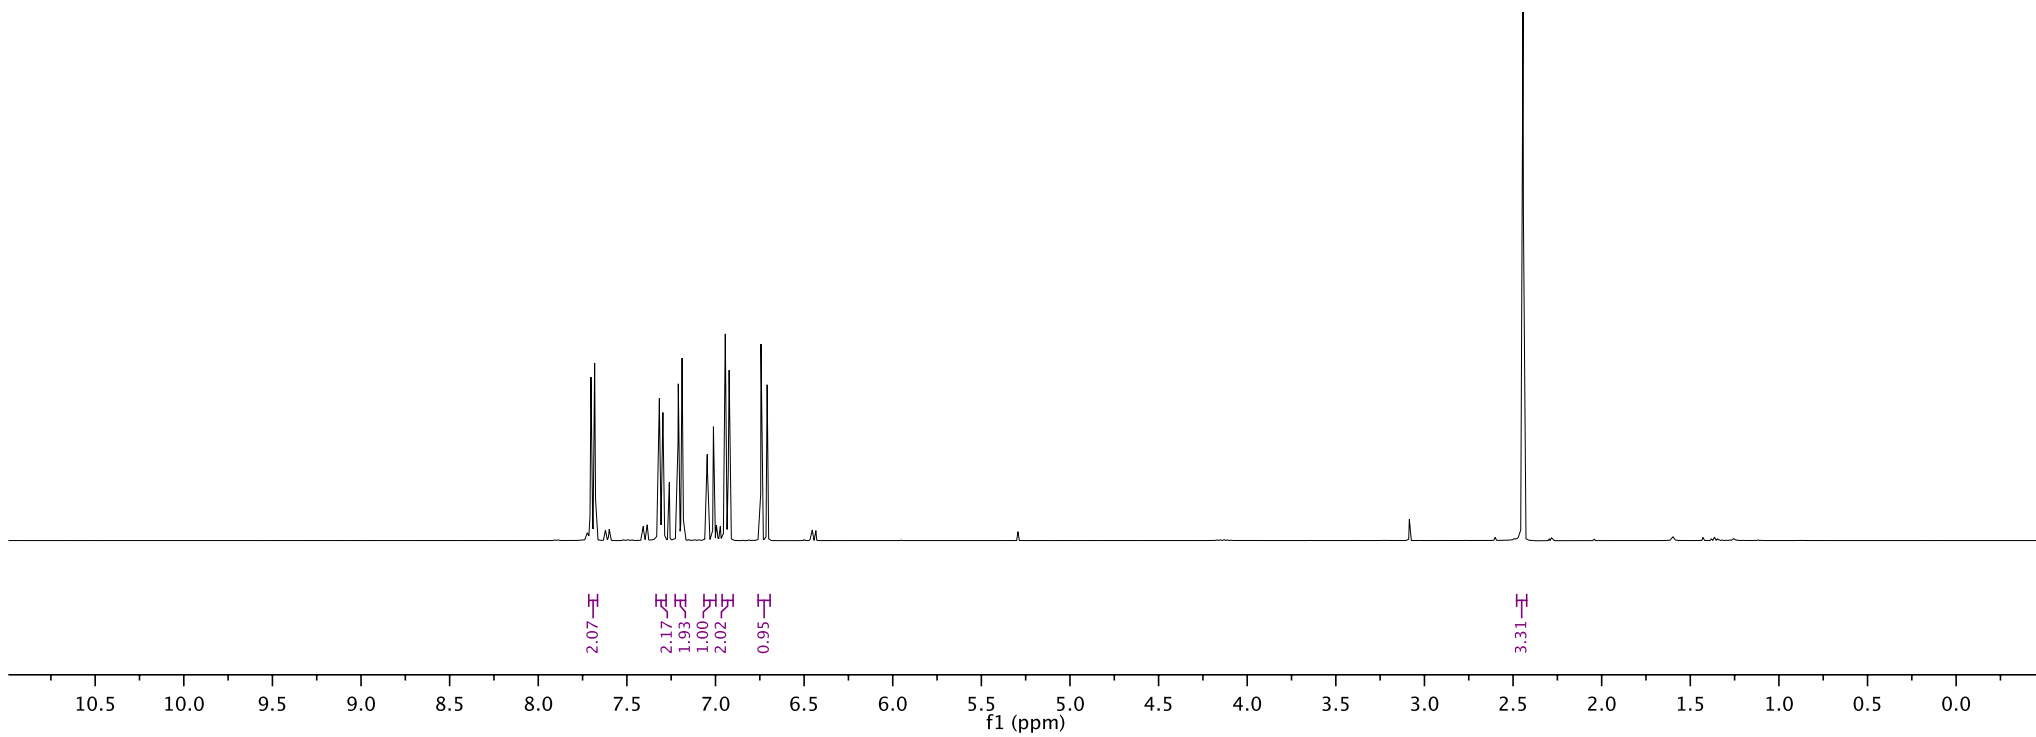

| Parameter              | Value               |
|------------------------|---------------------|
| Title                  | AHC-7-91-2-CH.2.fid |
| Origin                 | Bruker BioSpin GmbH |
| Solvent                | CDCl3               |
| Temperature            | 294.9               |
| Pulse Sequence         | zgpg30              |
| Number of Scans        | 128                 |
| Receiver Gain          | 55.5                |
| Relaxation Delay       | 2.0000              |
| Pulse Width            | 10.0000             |
| Acquisition Time       | 1.3631              |
| Acquisition Date       | 2017-01-05T15:57:47 |
| Spectrometer Frequency | 100.62              |
| Spectral Width         | 24038.5             |
| Lowest Frequency       | -1958.0             |
| Nucleus                | <sup>13</sup> C     |
| Acquired Size          | 32768               |
| Spectral Size          | 65536               |

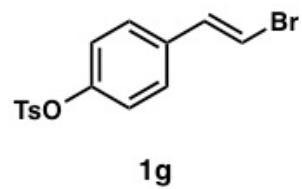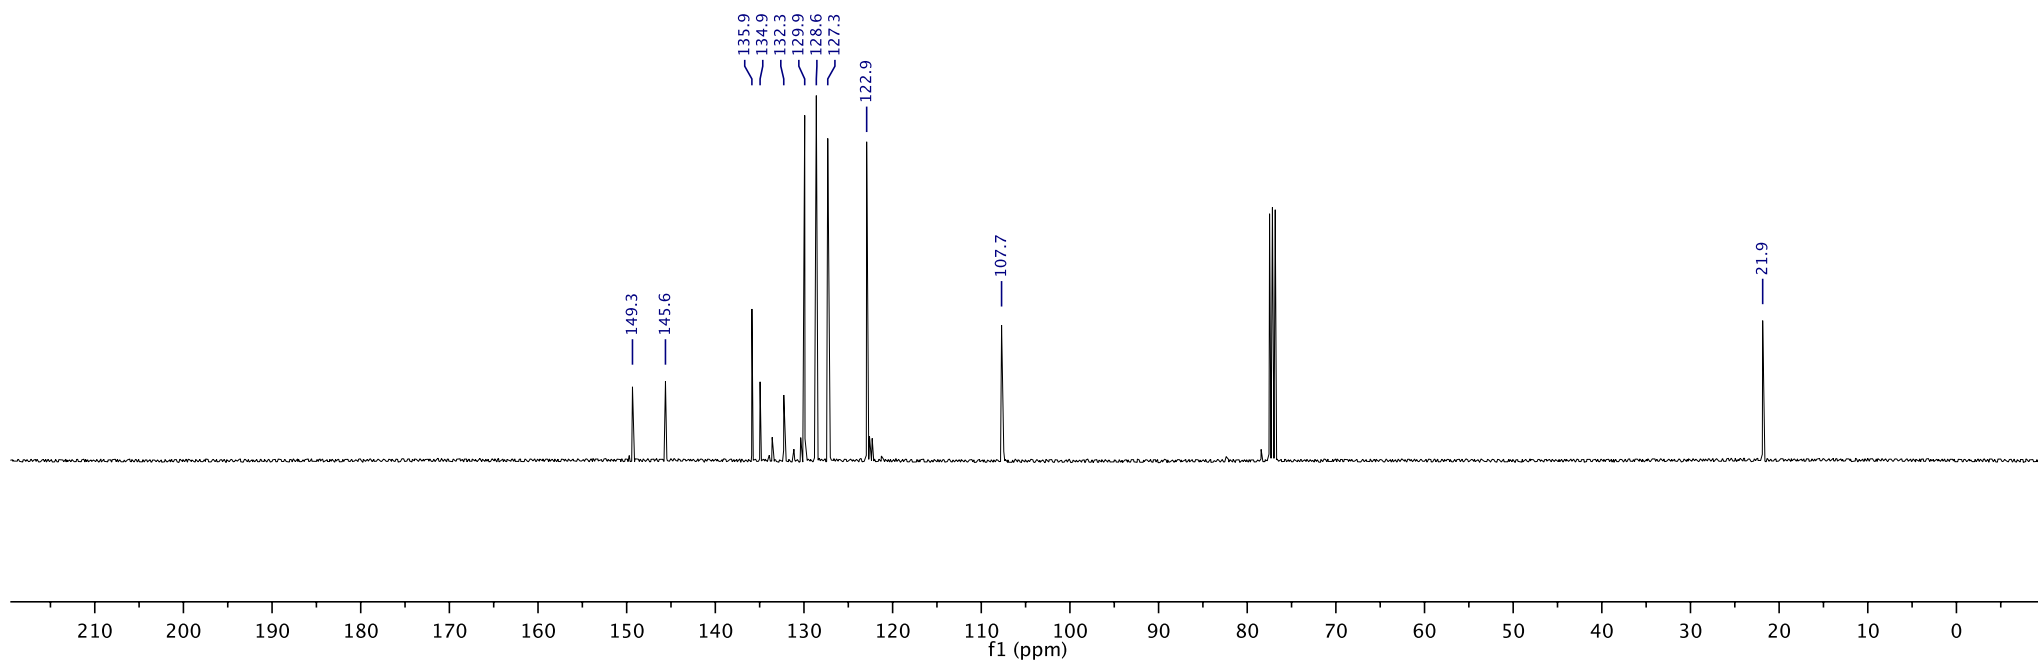

| Parameter              | Value               |
|------------------------|---------------------|
| Title                  | JLH-3-093-column-CH |
| Origin                 | Varian              |
| Solvent                | "cdcl3"             |
| Temperature            | 25.0                |
| Pulse Sequence         | s2pul               |
| Number of Scans        | 8                   |
| Receiver Gain          | 32                  |
| Relaxation Delay       | 1.0000              |
| Pulse Width            | 5.9000              |
| Acquisition Time       | 3.0000              |
| Acquisition Date       | 2016-04-23T15:48:26 |
| Spectrometer Frequency | 499.66              |
| Spectral Width         | 8000.0              |
| Lowest Frequency       | -1026.1             |
| Nucleus                | <sup>1</sup> H      |
| Acquired Size          | 24000               |
| Spectral Size          | 65536               |

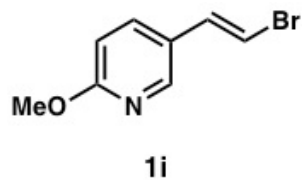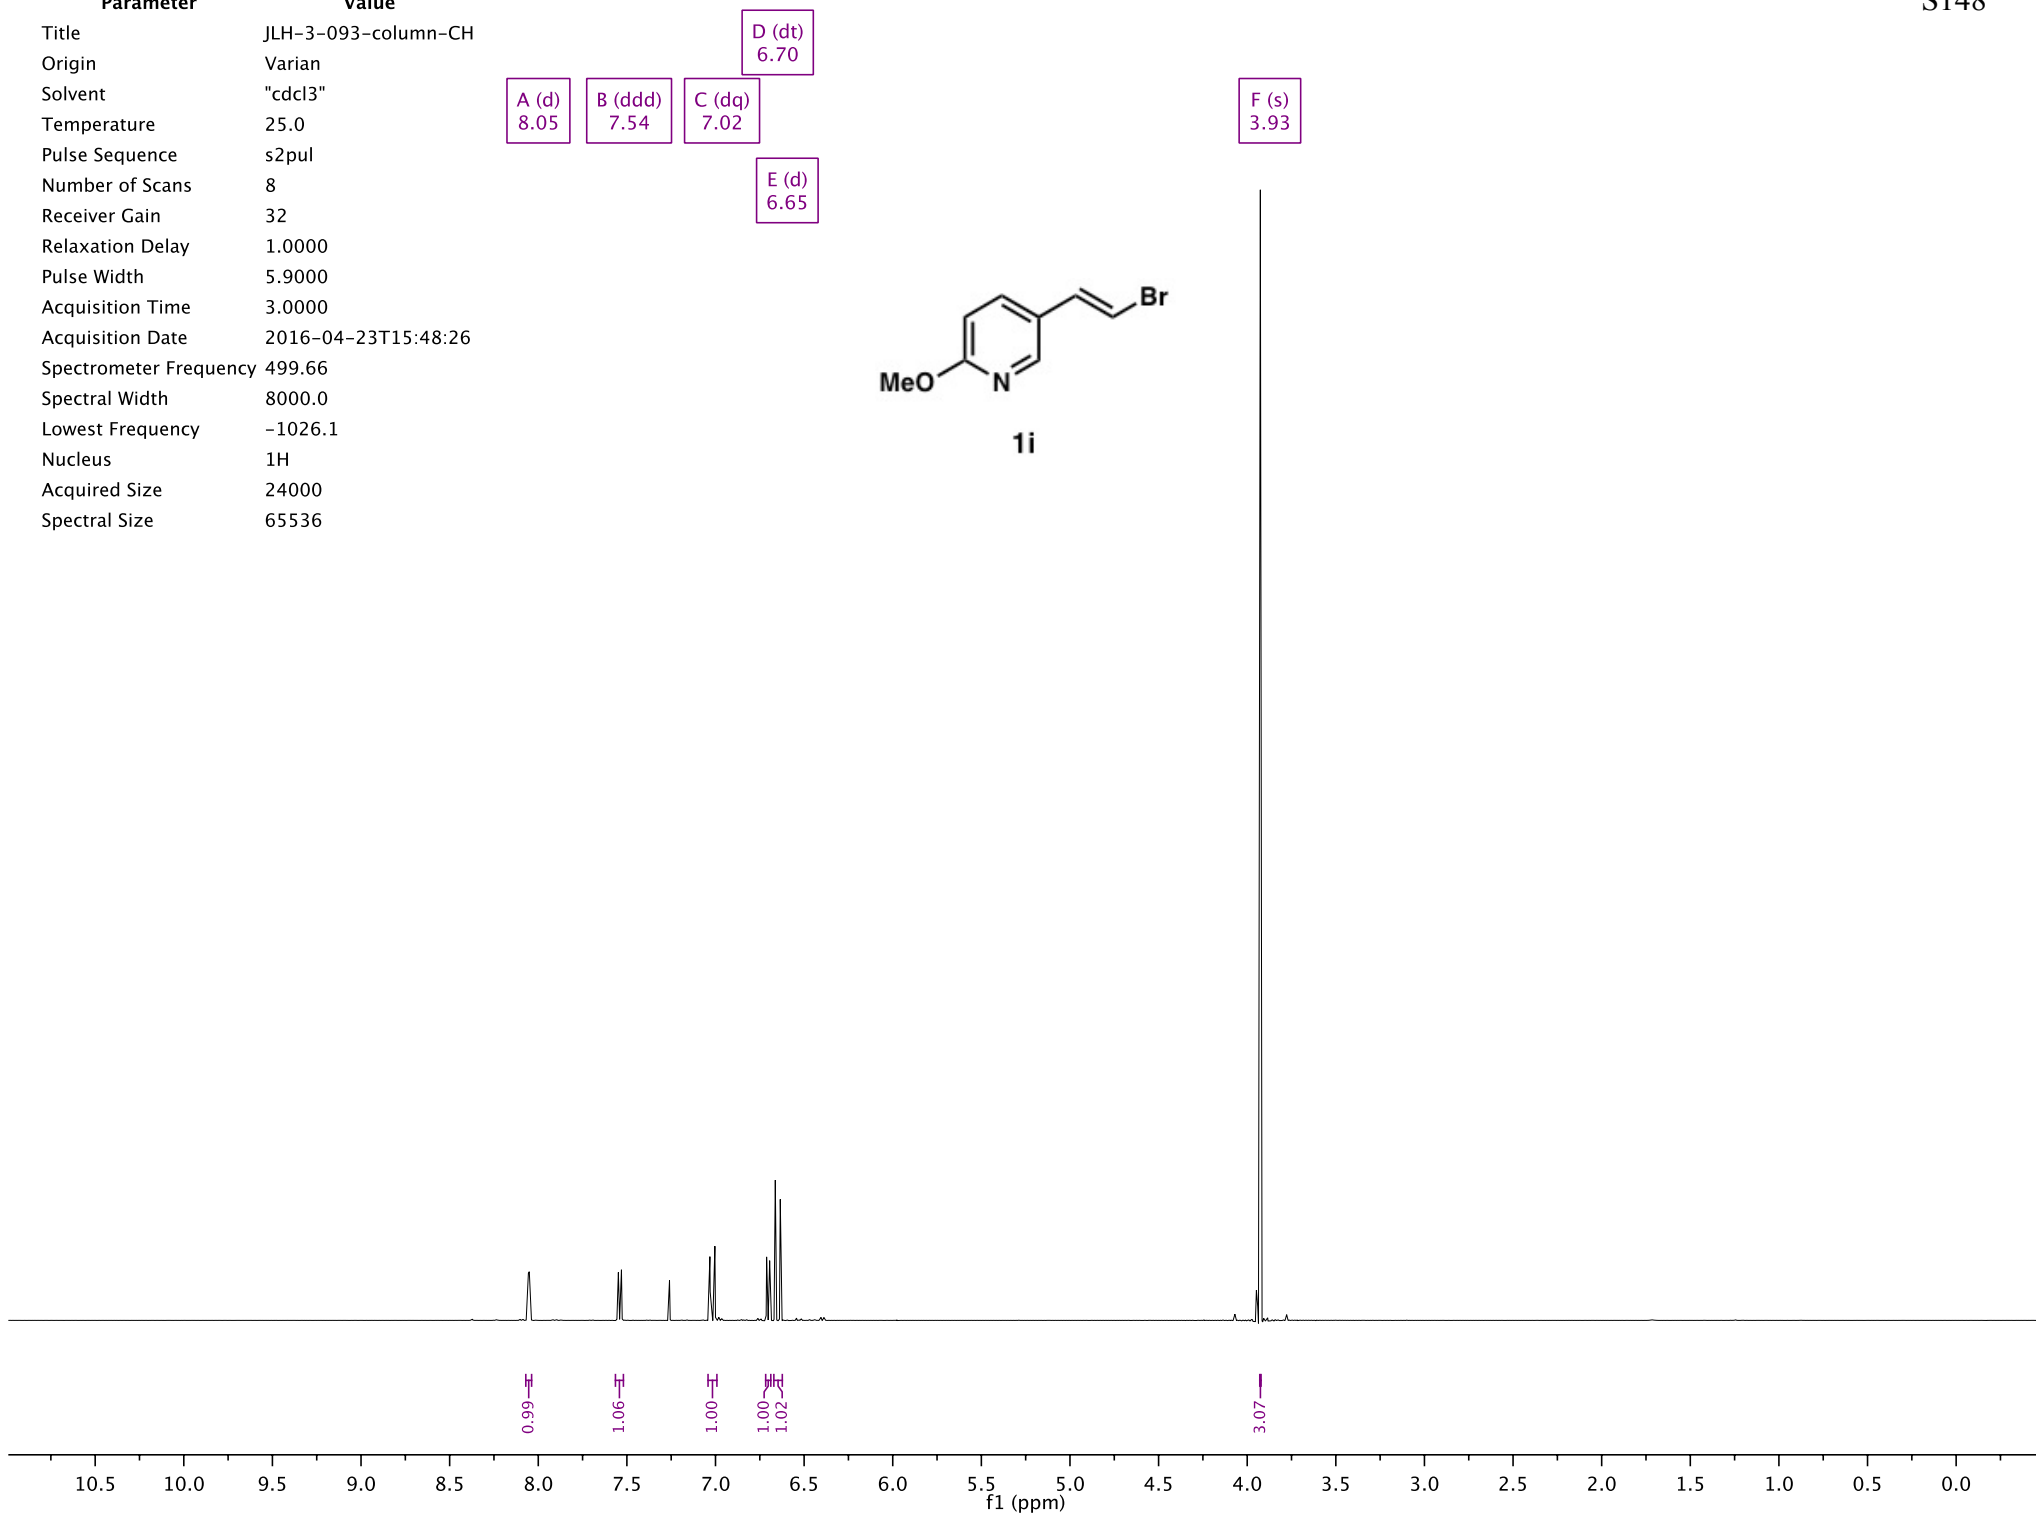



| Parameter              | Value               |
|------------------------|---------------------|
| Title                  | JLH-3-093-column-CH |
| Origin                 | Varian              |
| Solvent                | "cdcl3"             |
| Temperature            | 25.0                |
| Pulse Sequence         | s2pul               |
| Number of Scans        | 256                 |
| Receiver Gain          | 30                  |
| Relaxation Delay       | 1.0000              |
| Pulse Width            | 4.5000              |
| Acquisition Time       | 1.0420              |
| Acquisition Date       | 2016-04-23T15:49:14 |
| Spectrometer Frequency | 125.65              |
| Spectral Width         | 31446.5             |
| Lowest Frequency       | -1872.8             |
| Nucleus                | 13C                 |
| Acquired Size          | 32768               |
| Spectral Size          | 65536               |

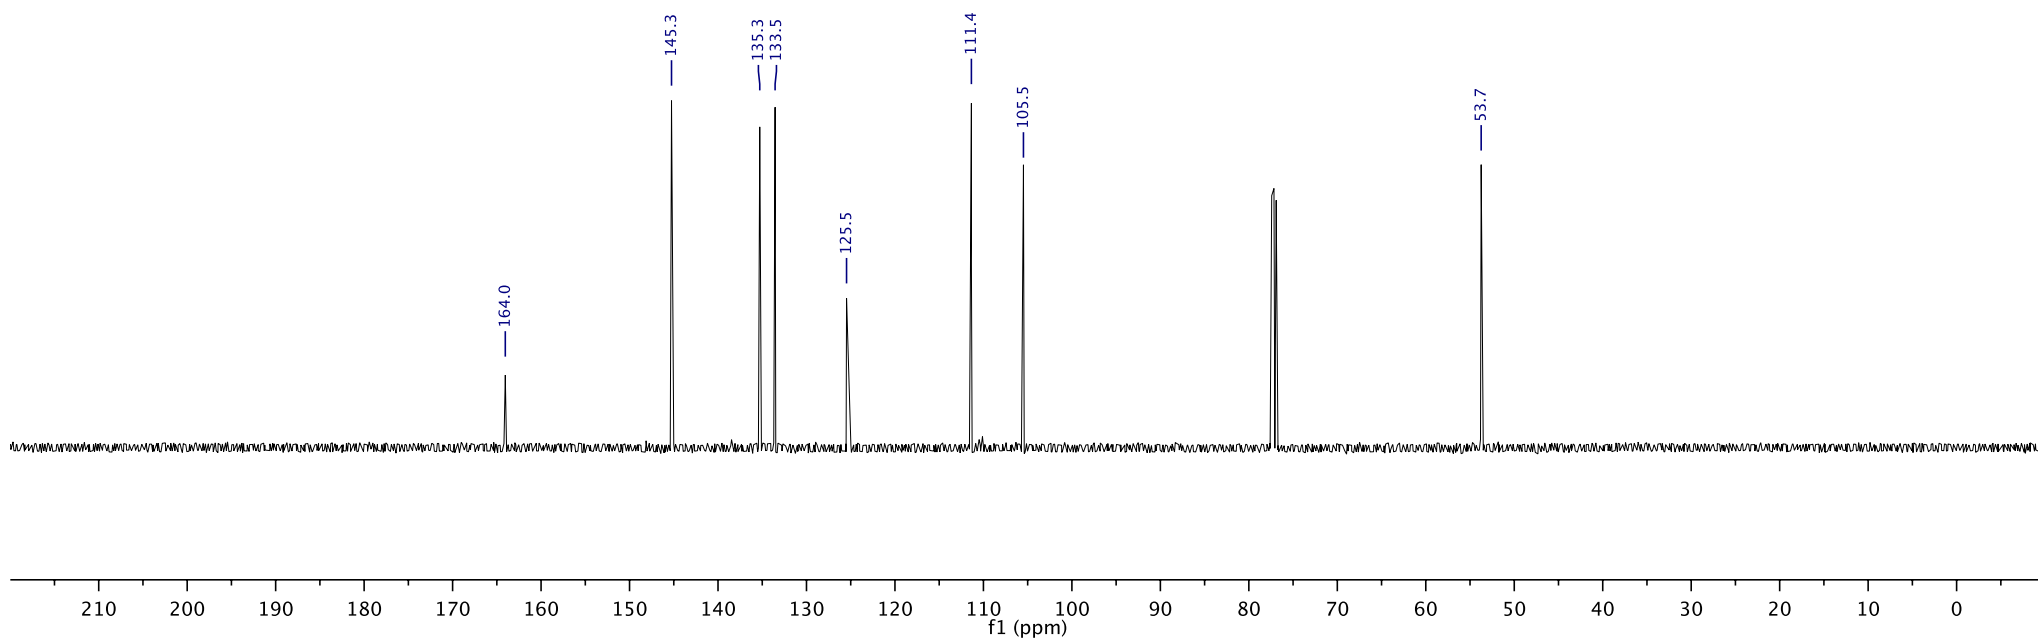

| Parameter              | Value               |
|------------------------|---------------------|
| Title                  | NAO-01-177-B.1.fid  |
| Origin                 | Bruker BioSpin GmbH |
| Solvent                | CDCl3               |
| Temperature            | 295.0               |
| Pulse Sequence         | zg30                |
| Number of Scans        | 16                  |
| Receiver Gain          | 64.2                |
| Relaxation Delay       | 1.0000              |
| Pulse Width            | 11.7000             |
| Acquisition Time       | 4.0894              |
| Acquisition Date       | 2016-07-21T05:52:07 |
| Spectrometer Frequency | 400.13              |
| Spectral Width         | 8012.8              |
| Lowest Frequency       | -1555.6             |
| Nucleus                | 1H                  |
| Acquired Size          | 32768               |
| Spectral Size          | 65536               |

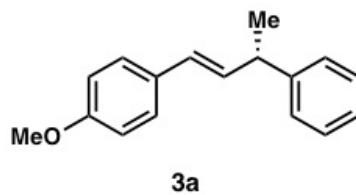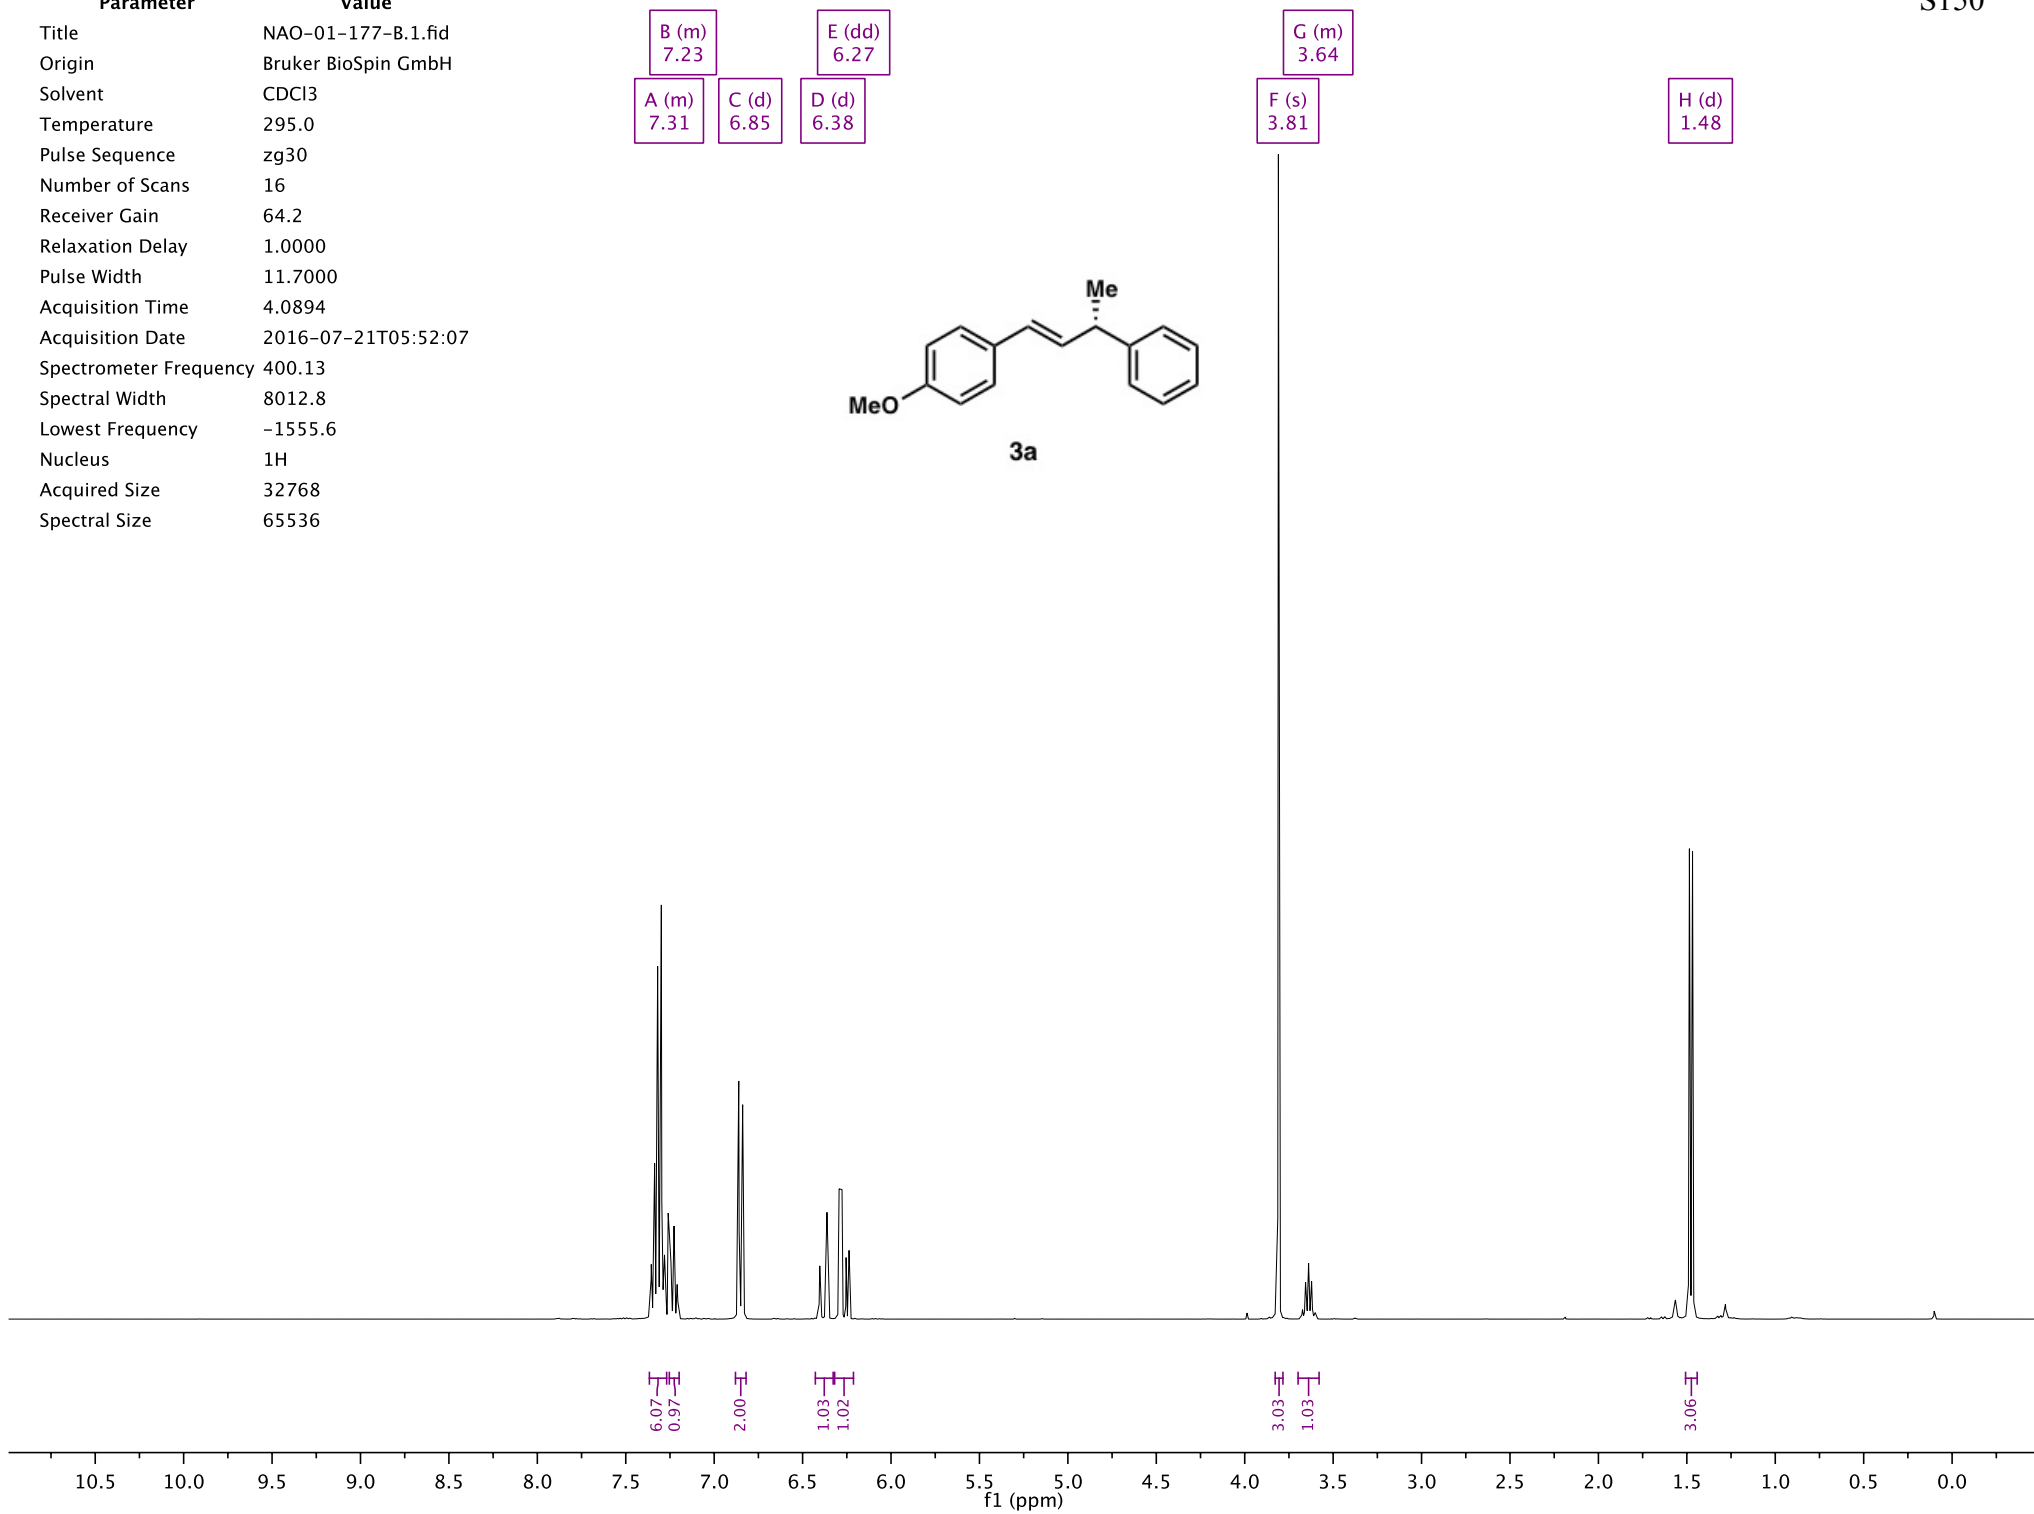

| Parameter              | Value               |
|------------------------|---------------------|
| Title                  | NAO-01-177-B.2.fid  |
| Origin                 | Bruker BioSpin GmbH |
| Solvent                | CDCl3               |
| Temperature            | 294.9               |
| Pulse Sequence         | zgpg30              |
| Number of Scans        | 128                 |
| Receiver Gain          | 72.0                |
| Relaxation Delay       | 2.0000              |
| Pulse Width            | 10.0000             |
| Acquisition Time       | 1.3631              |
| Acquisition Date       | 2016-07-21T05:59:57 |
| Spectrometer Frequency | 100.62              |
| Spectral Width         | 24038.5             |
| Lowest Frequency       | -1938.4             |
| Nucleus                | <sup>13</sup> C     |
| Acquired Size          | 32768               |
| Spectral Size          | 65536               |

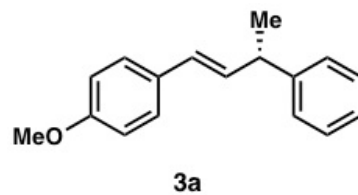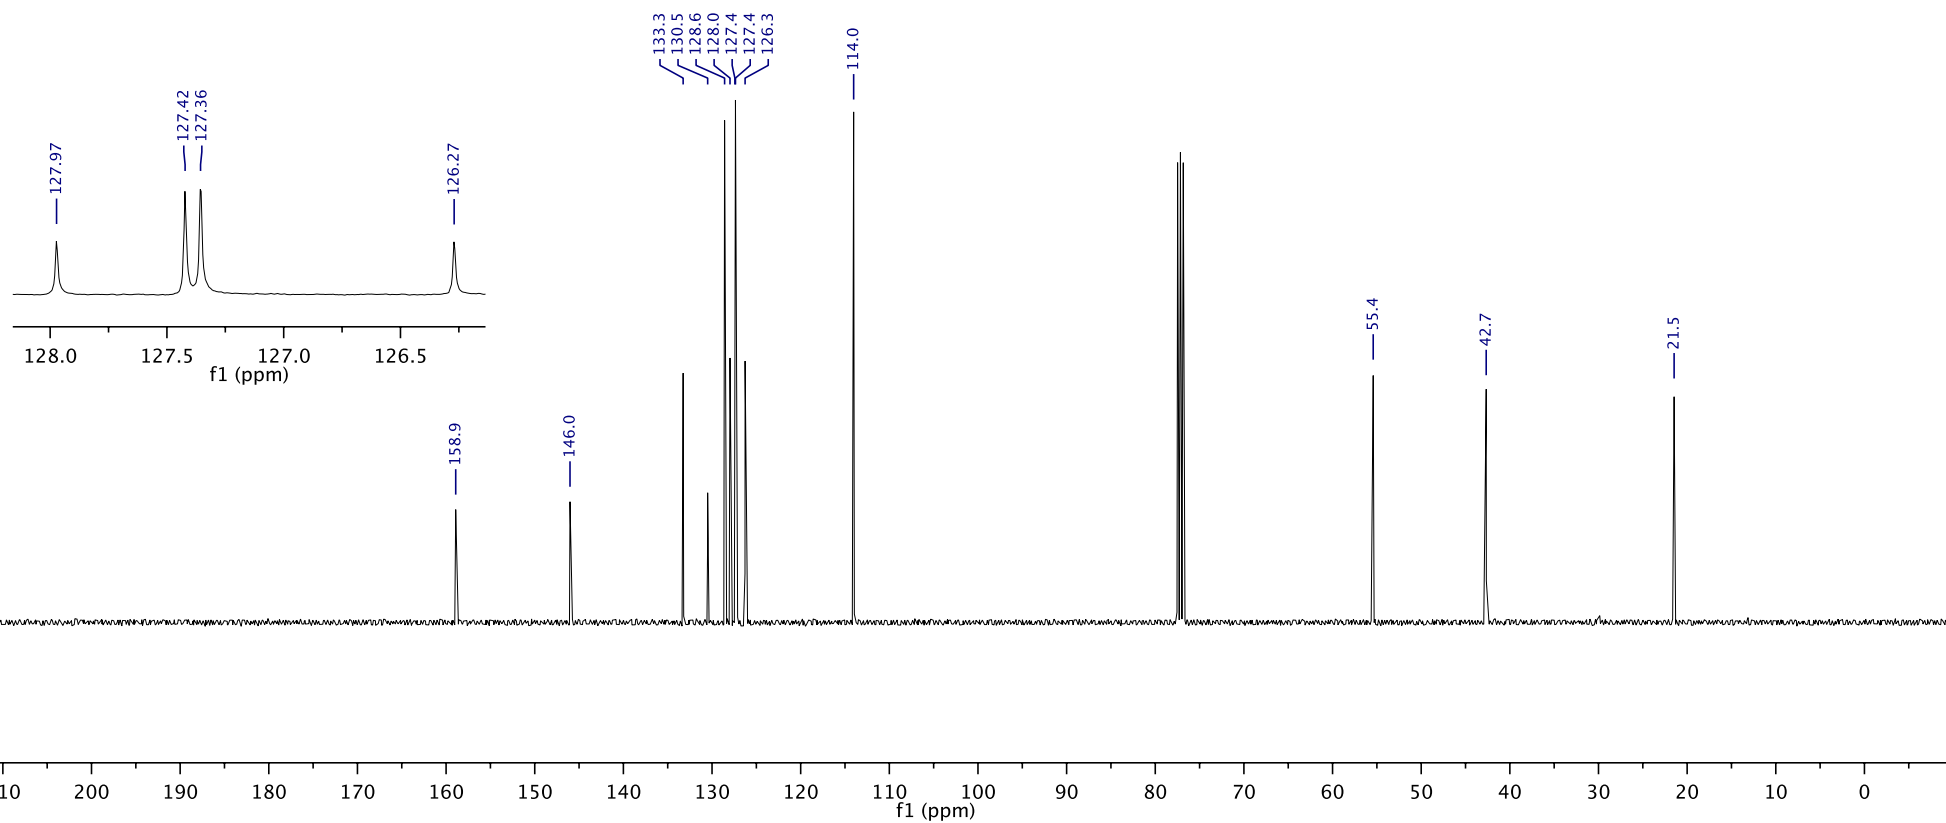

| Parameter              | Value                   |
|------------------------|-------------------------|
| Title                  | JLH-5-099A-column.1.fid |
| Origin                 | Bruker BioSpin GmbH     |
| Solvent                | CDCl3                   |
| Temperature            | 294.9                   |
| Pulse Sequence         | zg30                    |
| Number of Scans        | 16                      |
| Receiver Gain          | 30.3                    |
| Relaxation Delay       | 1.0000                  |
| Pulse Width            | 11.7000                 |
| Acquisition Time       | 4.0894                  |
| Acquisition Date       | 2016-07-21T02:57:27     |
| Spectrometer Frequency | 400.13                  |
| Spectral Width         | 8012.8                  |
| Lowest Frequency       | -1563.6                 |
| Nucleus                | <sup>1</sup> H          |
| Acquired Size          | 32768                   |
| Spectral Size          | 65536                   |

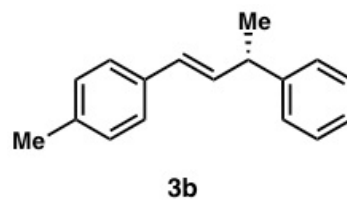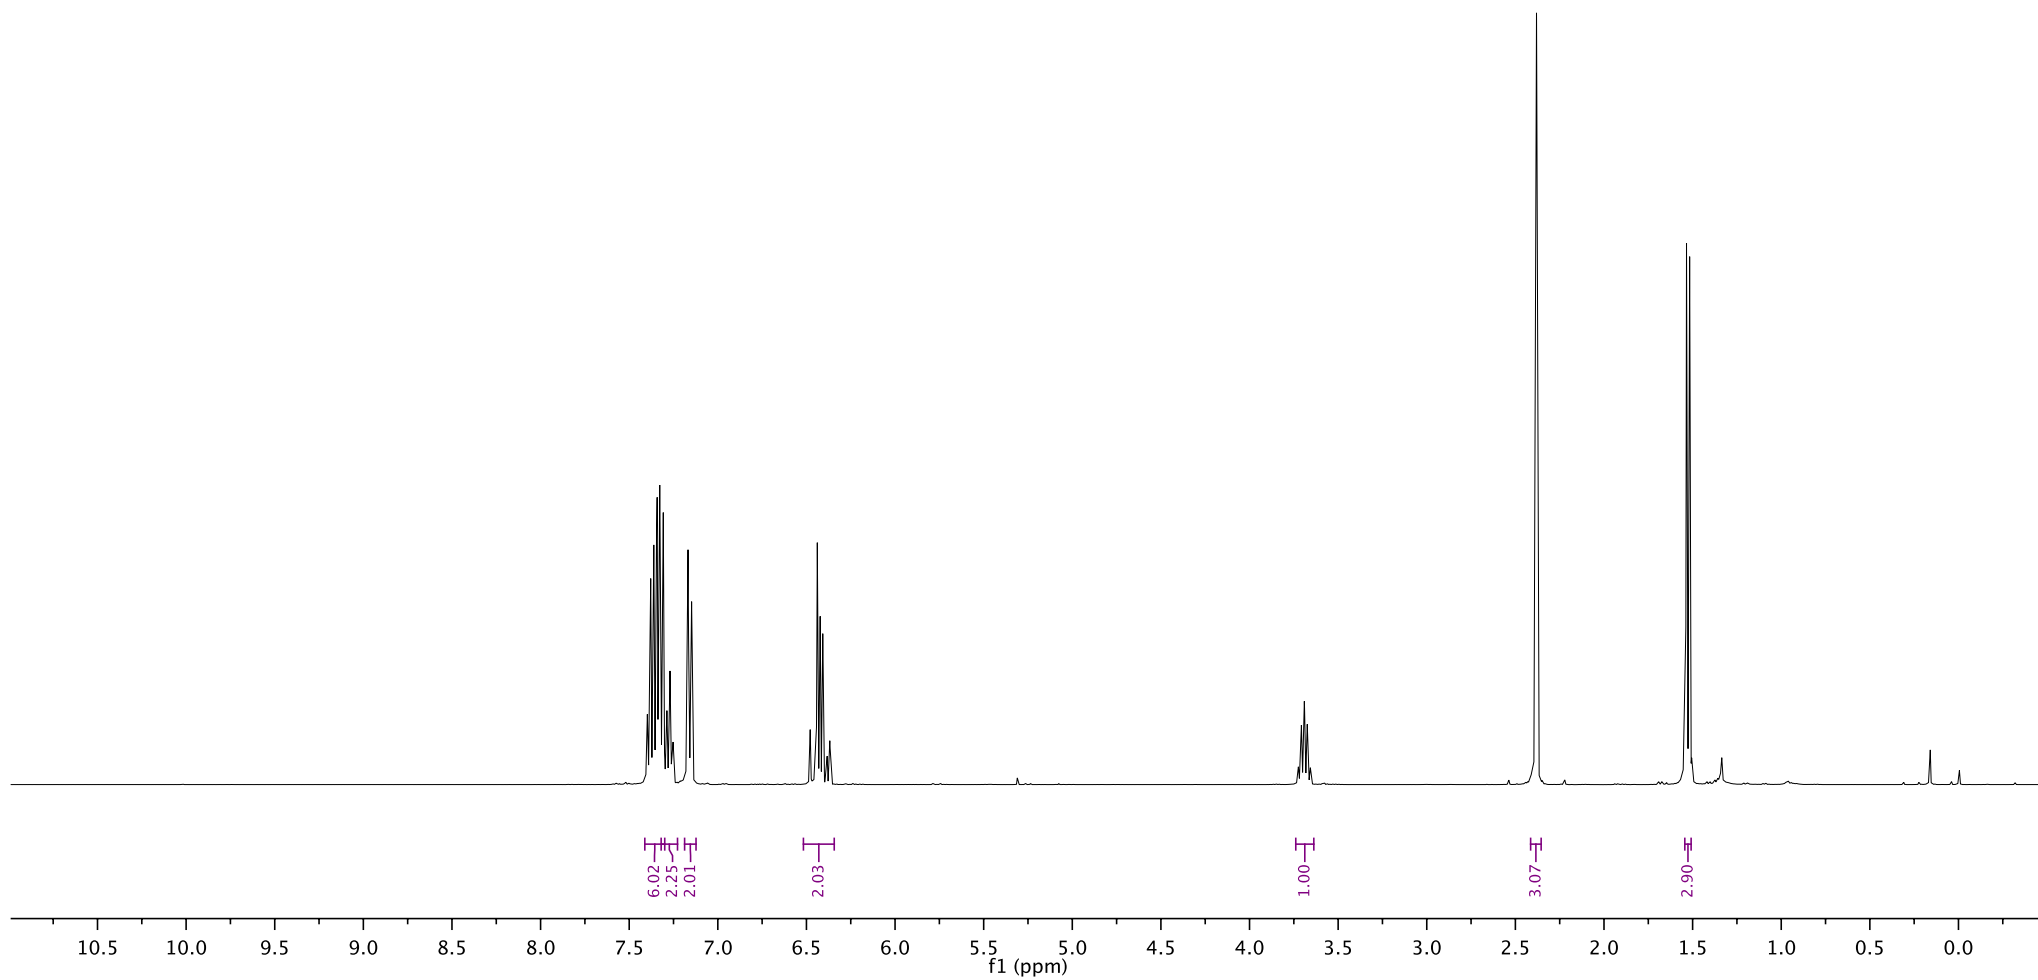

| Parameter              | Value                   |
|------------------------|-------------------------|
| Title                  | JLH-5-099A-column.2.fid |
| Origin                 | Bruker BioSpin GmbH     |
| Solvent                | CDCl3                   |
| Temperature            | 294.9                   |
| Pulse Sequence         | zgpg30                  |
| Number of Scans        | 128                     |
| Receiver Gain          | 87.8                    |
| Relaxation Delay       | 2.0000                  |
| Pulse Width            | 10.0000                 |
| Acquisition Time       | 1.3631                  |
| Acquisition Date       | 2016-07-21T03:05:17     |
| Spectrometer Frequency | 100.62                  |
| Spectral Width         | 24038.5                 |
| Lowest Frequency       | -1949.5                 |
| Nucleus                | 13C                     |
| Acquired Size          | 32768                   |
| Spectral Size          | 65536                   |

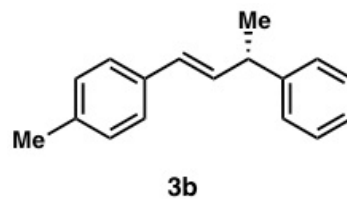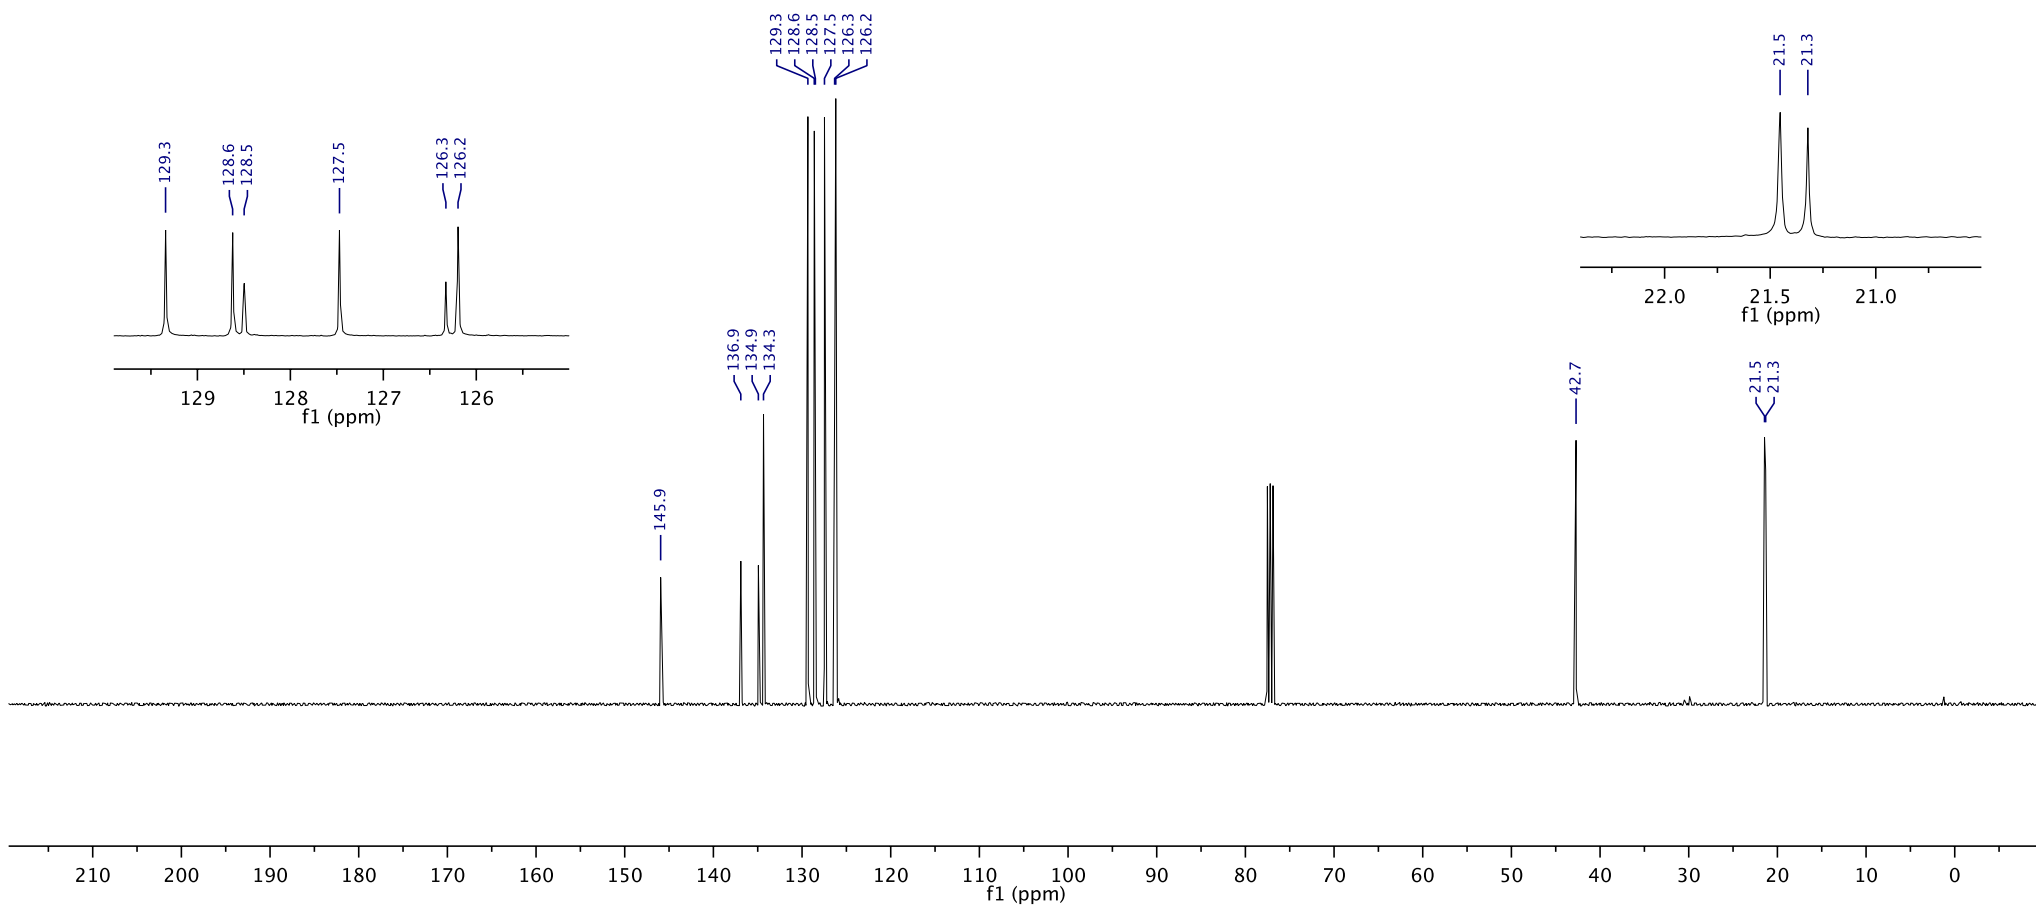

| Parameter              | Value                   |
|------------------------|-------------------------|
| Title                  | KEP-2-216_fr13-22.1.fid |
| Origin                 | Bruker BioSpin GmbH     |
| Solvent                | CDCl3                   |
| Temperature            | 294.9                   |
| Pulse Sequence         | zg30                    |
| Number of Scans        | 16                      |
| Receiver Gain          | 78.7                    |
| Relaxation Delay       | 1.0000                  |
| Pulse Width            | 11.7000                 |
| Acquisition Time       | 4.0894                  |
| Acquisition Date       | 2016-07-20T23:03:44     |
| Spectrometer Frequency | 400.13                  |
| Spectral Width         | 8012.8                  |
| Lowest Frequency       | -1535.6                 |
| Nucleus                | <sup>1</sup> H          |
| Acquired Size          | 32768                   |
| Spectral Size          | 65536                   |

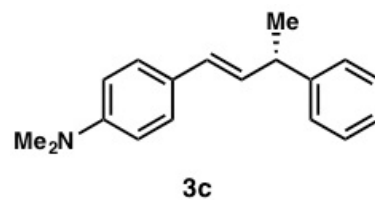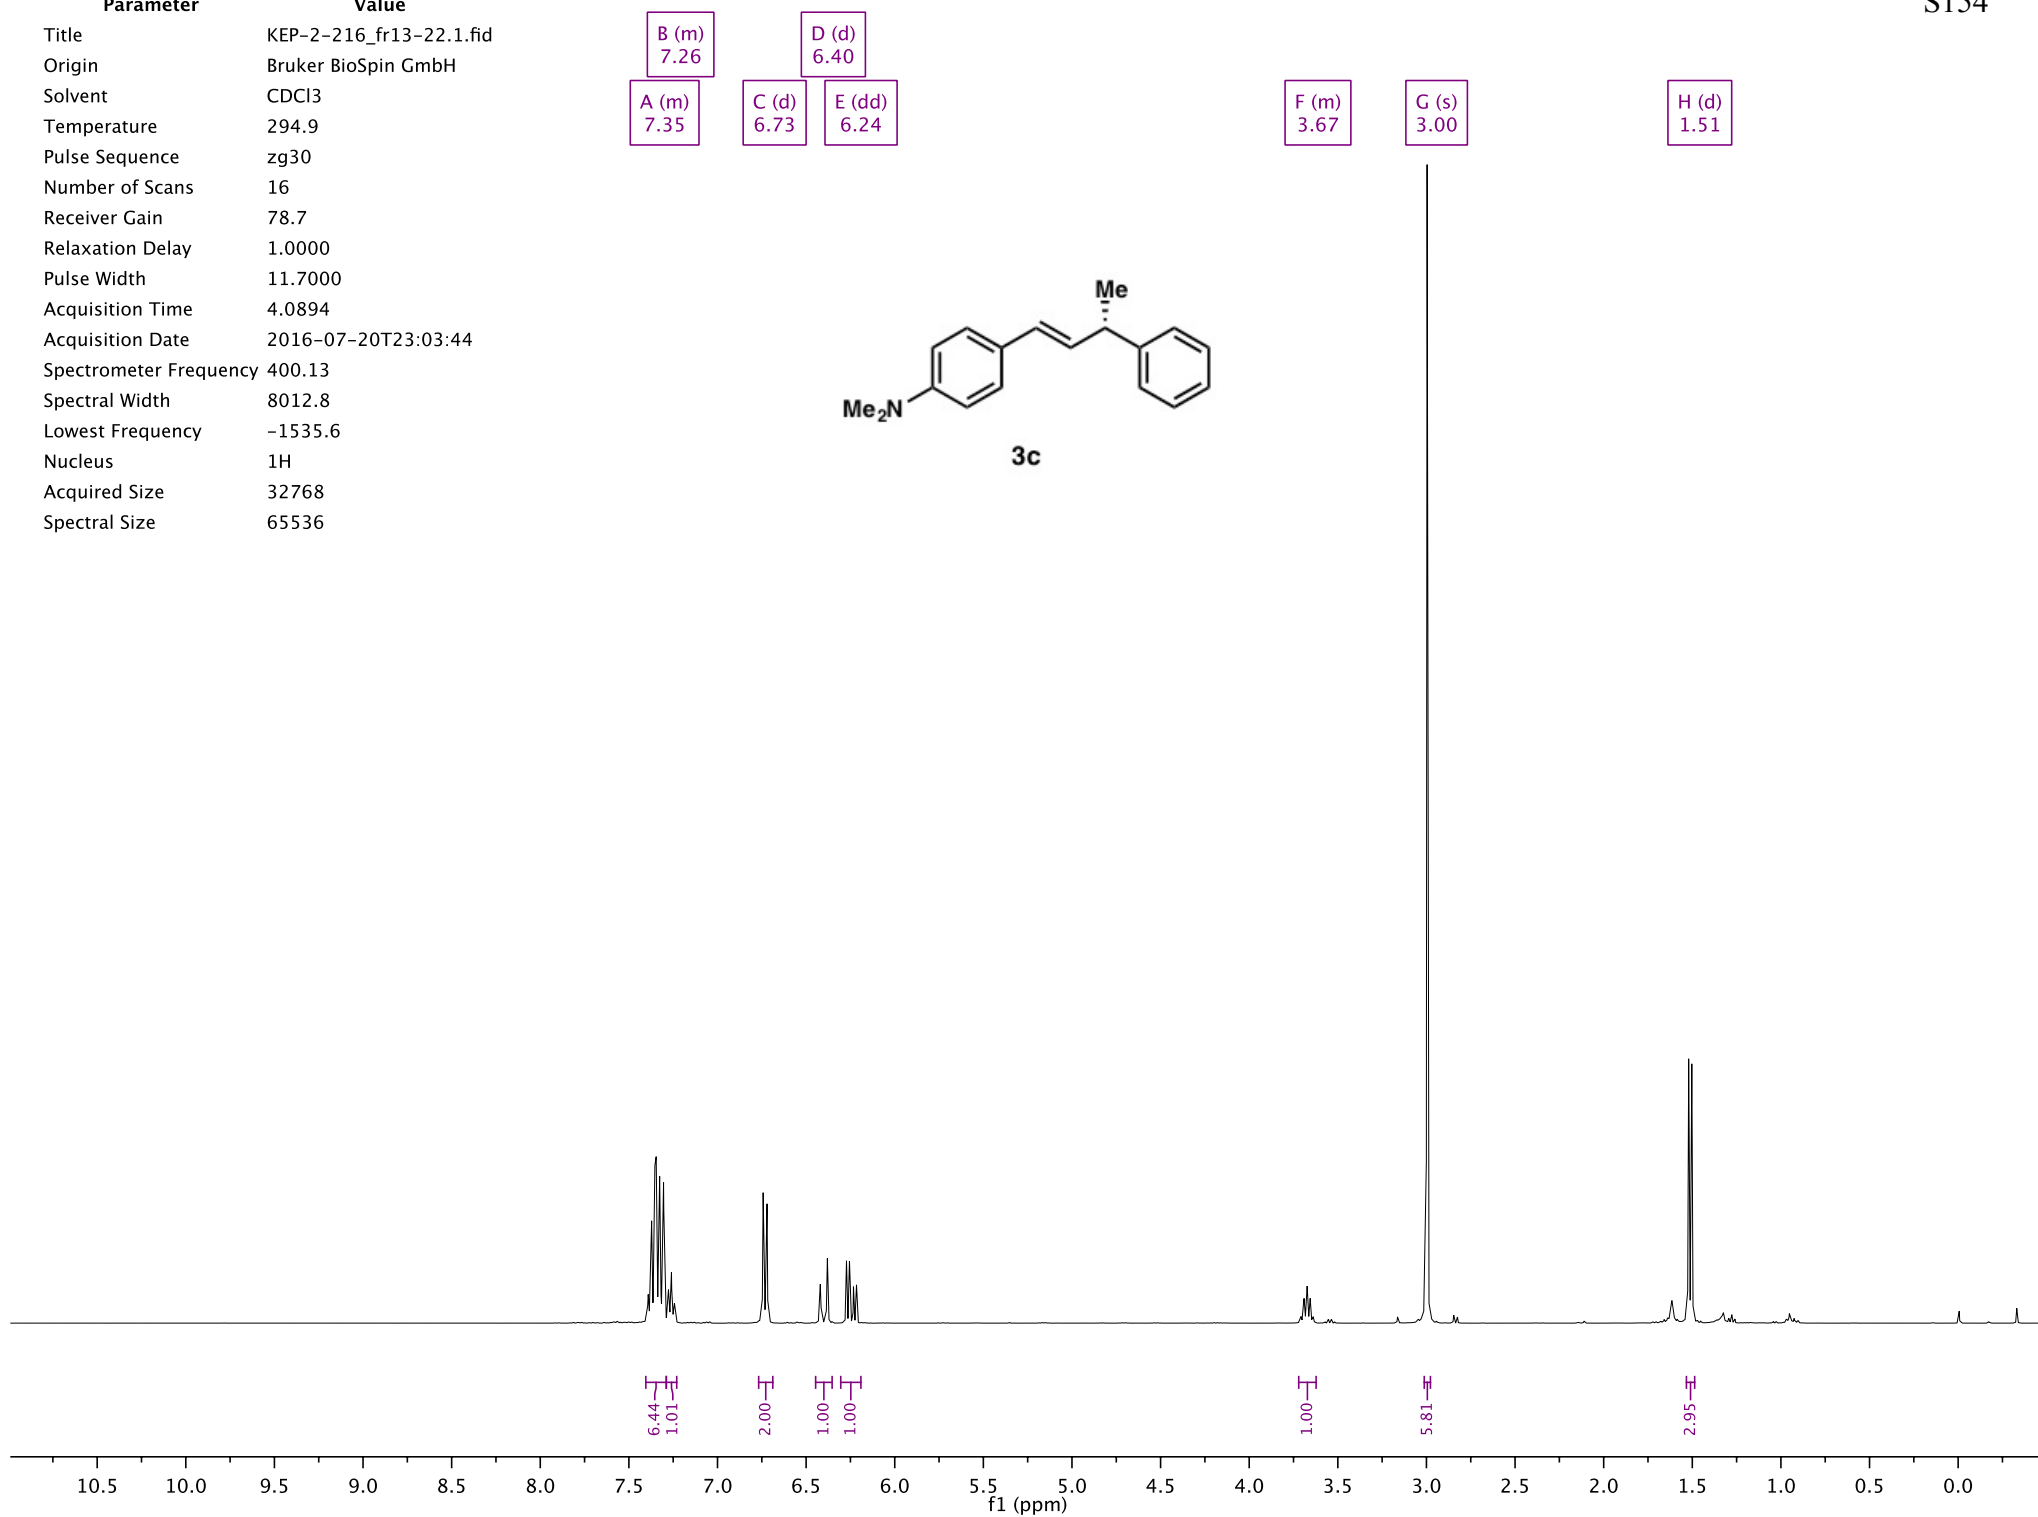

| Parameter              | Value                   |
|------------------------|-------------------------|
| Title                  | KEP-2-216_fr13-22.2.fid |
| Origin                 | Bruker BioSpin GmbH     |
| Solvent                | CDCl3                   |
| Temperature            | 294.9                   |
| Pulse Sequence         | zgpg30                  |
| Number of Scans        | 128                     |
| Receiver Gain          | 87.8                    |
| Relaxation Delay       | 2.0000                  |
| Pulse Width            | 10.0000                 |
| Acquisition Time       | 1.3631                  |
| Acquisition Date       | 2016-07-20T23:11:35     |
| Spectrometer Frequency | 100.62                  |
| Spectral Width         | 24038.5                 |
| Lowest Frequency       | -1937.0                 |
| Nucleus                | 13C                     |
| Acquired Size          | 32768                   |
| Spectral Size          | 65536                   |

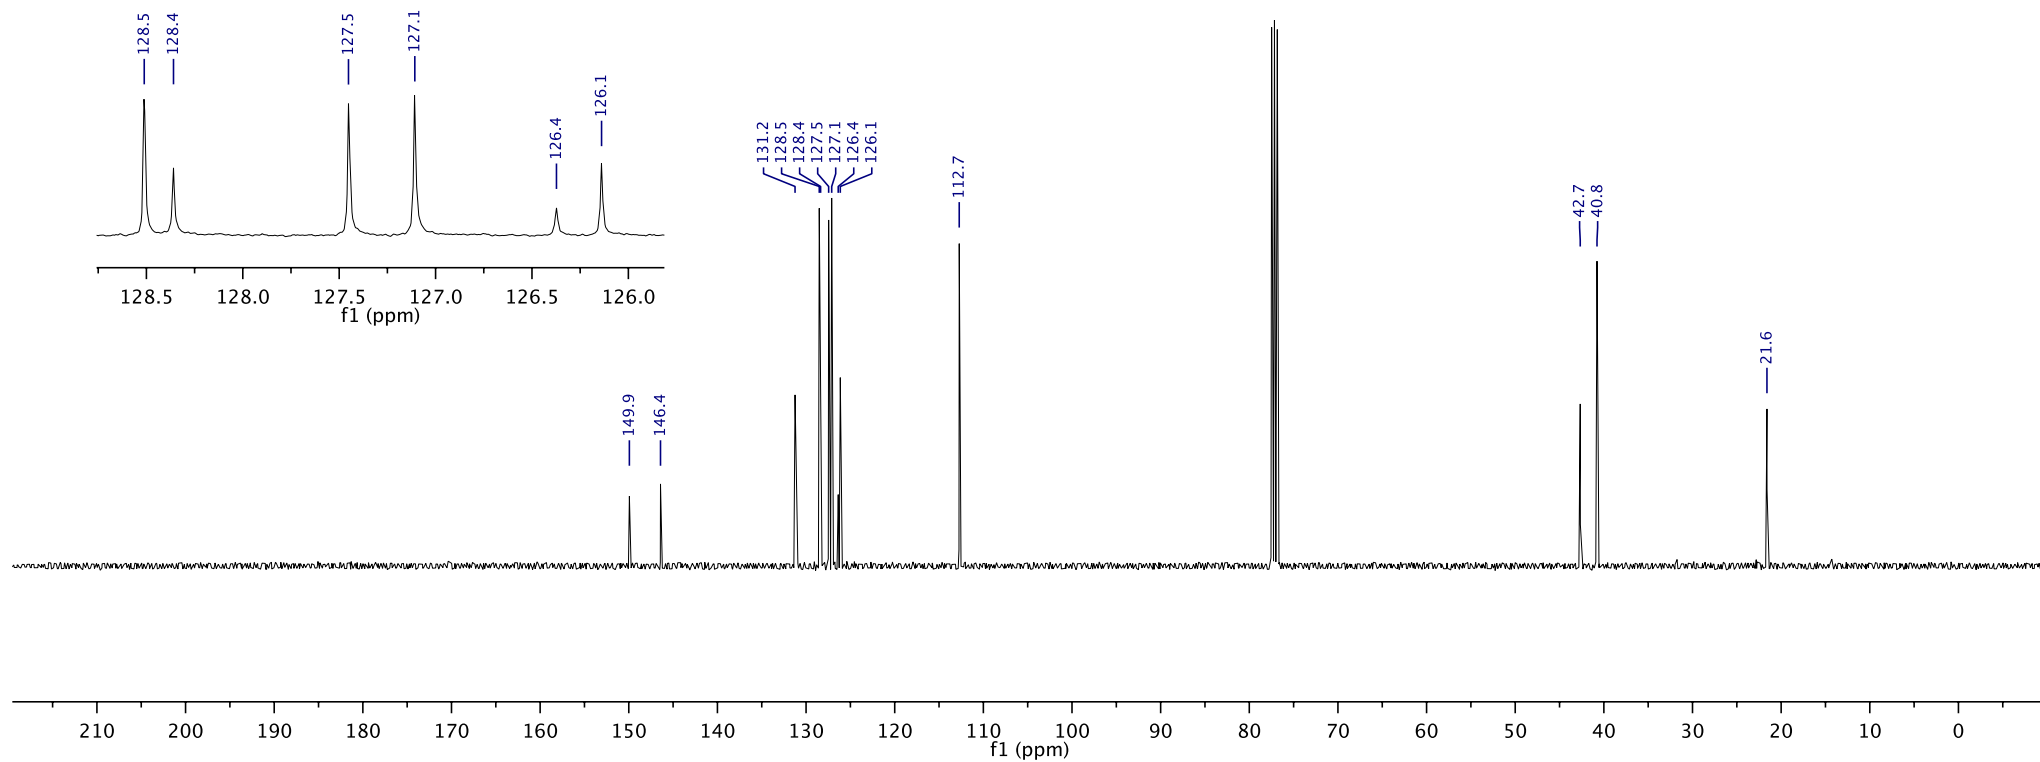

| Parameter              | Value                   |
|------------------------|-------------------------|
| Title                  | JLH-5-103A-column.1.fid |
| Origin                 | Bruker BioSpin GmbH     |
| Solvent                | CDCl3                   |
| Temperature            | 295.0                   |
| Pulse Sequence         | zg30                    |
| Number of Scans        | 16                      |
| Receiver Gain          | 30.3                    |
| Relaxation Delay       | 1.0000                  |
| Pulse Width            | 11.7000                 |
| Acquisition Time       | 4.0894                  |
| Acquisition Date       | 2016-07-21T00:02:30     |
| Spectrometer Frequency | 400.13                  |
| Spectral Width         | 8012.8                  |
| Lowest Frequency       | -1535.6                 |
| Nucleus                | <sup>1</sup> H          |
| Acquired Size          | 32768                   |
| Spectral Size          | 65536                   |

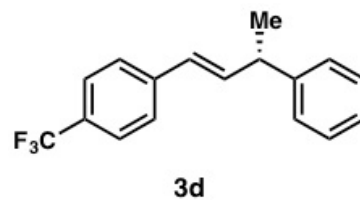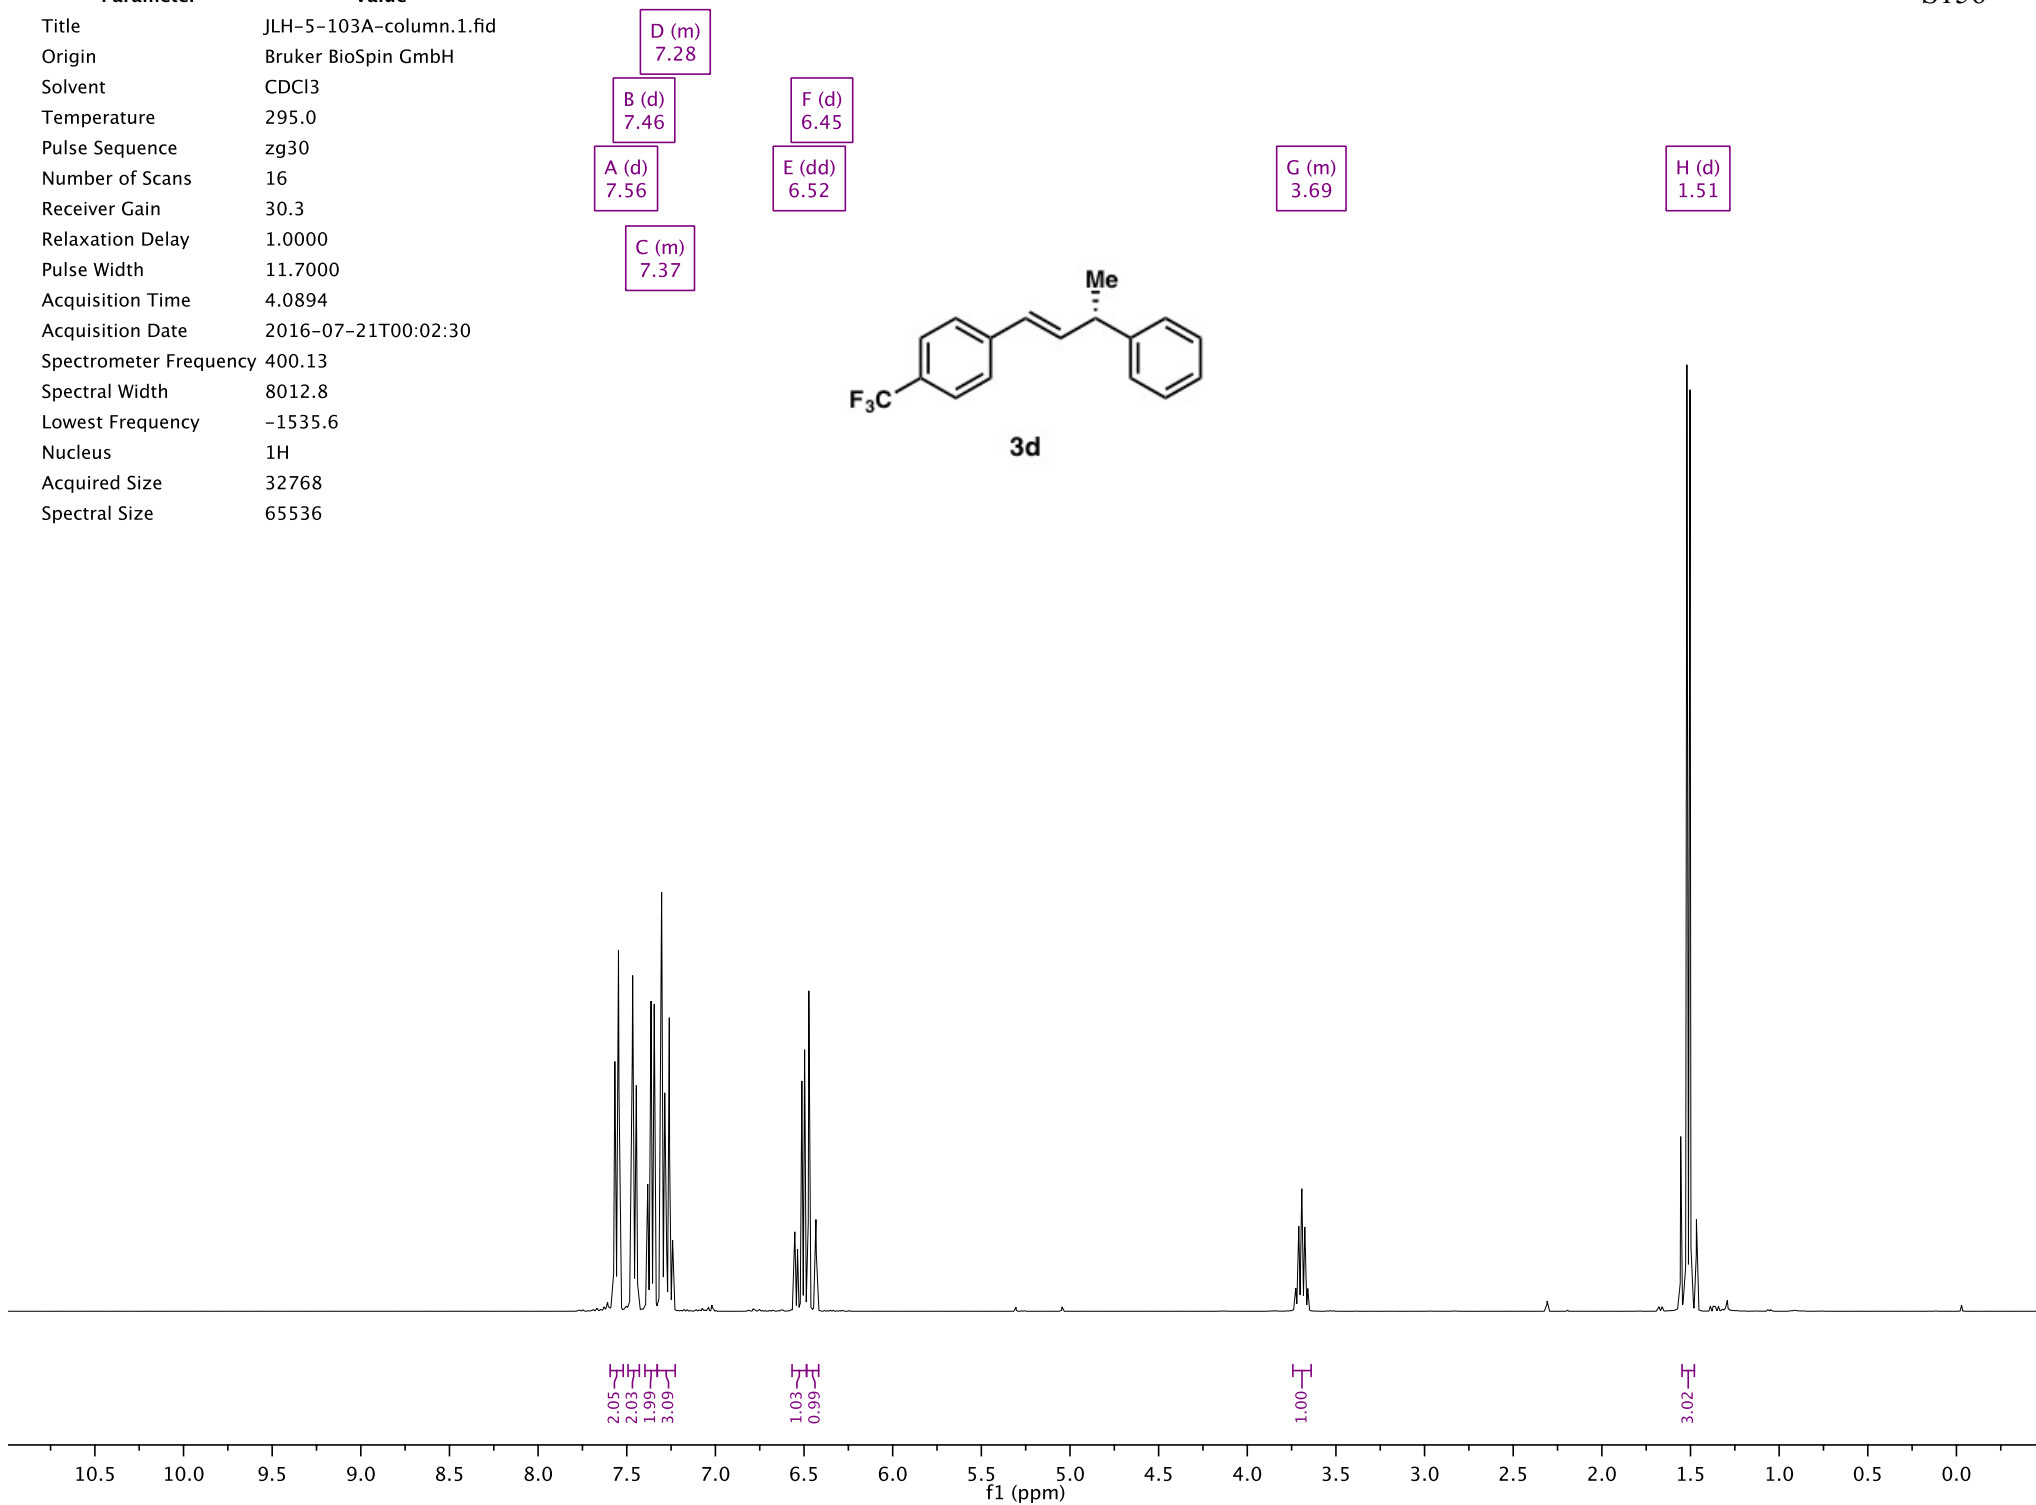



| Parameter              | Value                   |
|------------------------|-------------------------|
| Title                  | JLH-5-103A-column.2.fid |
| Origin                 | Bruker BioSpin GmbH     |
| Solvent                | CDCl3                   |
| Temperature            | 294.9                   |
| Pulse Sequence         | zgpg30                  |
| Number of Scans        | 128                     |
| Receiver Gain          | 72.0                    |
| Relaxation Delay       | 2.0000                  |
| Pulse Width            | 10.0000                 |
| Acquisition Time       | 1.3631                  |
| Acquisition Date       | 2016-07-21T00:10:20     |
| Spectrometer Frequency | 100.62                  |
| Spectral Width         | 24038.5                 |
| Lowest Frequency       | -1937.2                 |
| Nucleus                | <sup>13</sup> C         |
| Acquired Size          | 32768                   |
| Spectral Size          | 65536                   |

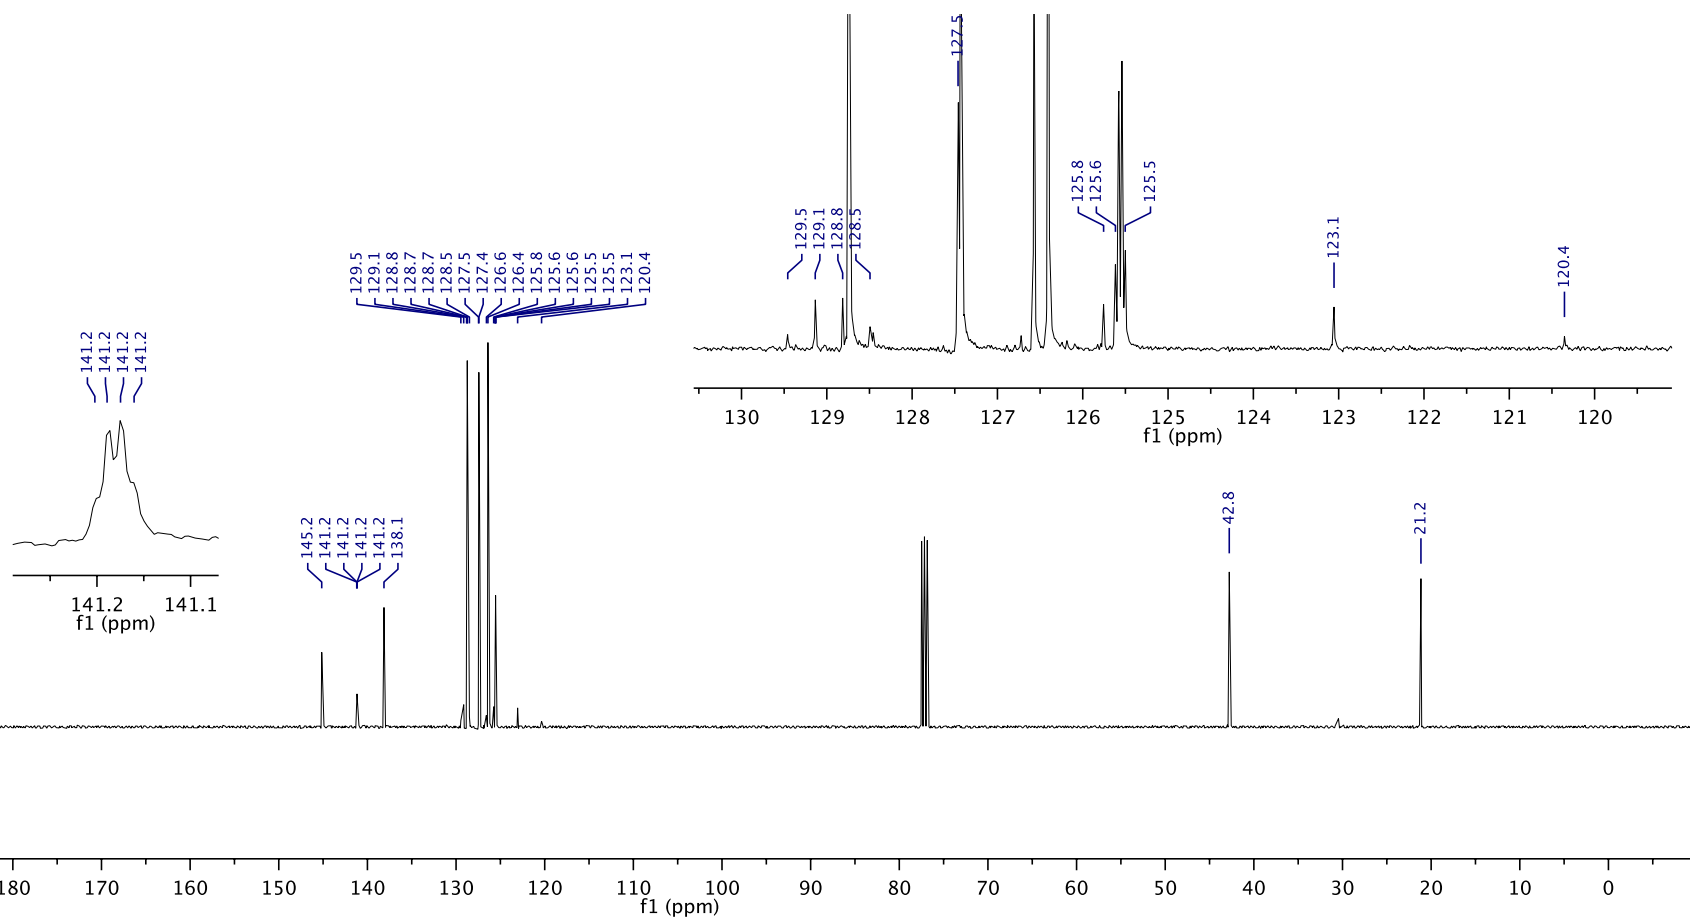

| Parameter              | Value               |
|------------------------|---------------------|
| Title                  | JLH-5-103A          |
| Origin                 | Varian              |
| Solvent                | "cdcl3"             |
| Temperature            | 25.0                |
| Pulse Sequence         | s2pul               |
| Number of Scans        | 16                  |
| Receiver Gain          | 30                  |
| Relaxation Delay       | 1.0000              |
| Pulse Width            | 6.3333              |
| Acquisition Time       | 0.9856              |
| Acquisition Date       | 2016-08-31T23:36:19 |
| Spectrometer Frequency | 282.34              |
| Spectral Width         | 64935.1             |
| Lowest Frequency       | -58252.6            |
| Nucleus                | 19F                 |
| Acquired Size          | 64000               |
| Spectral Size          | 131072              |
| Absolute Reference     |                     |

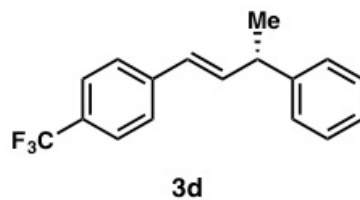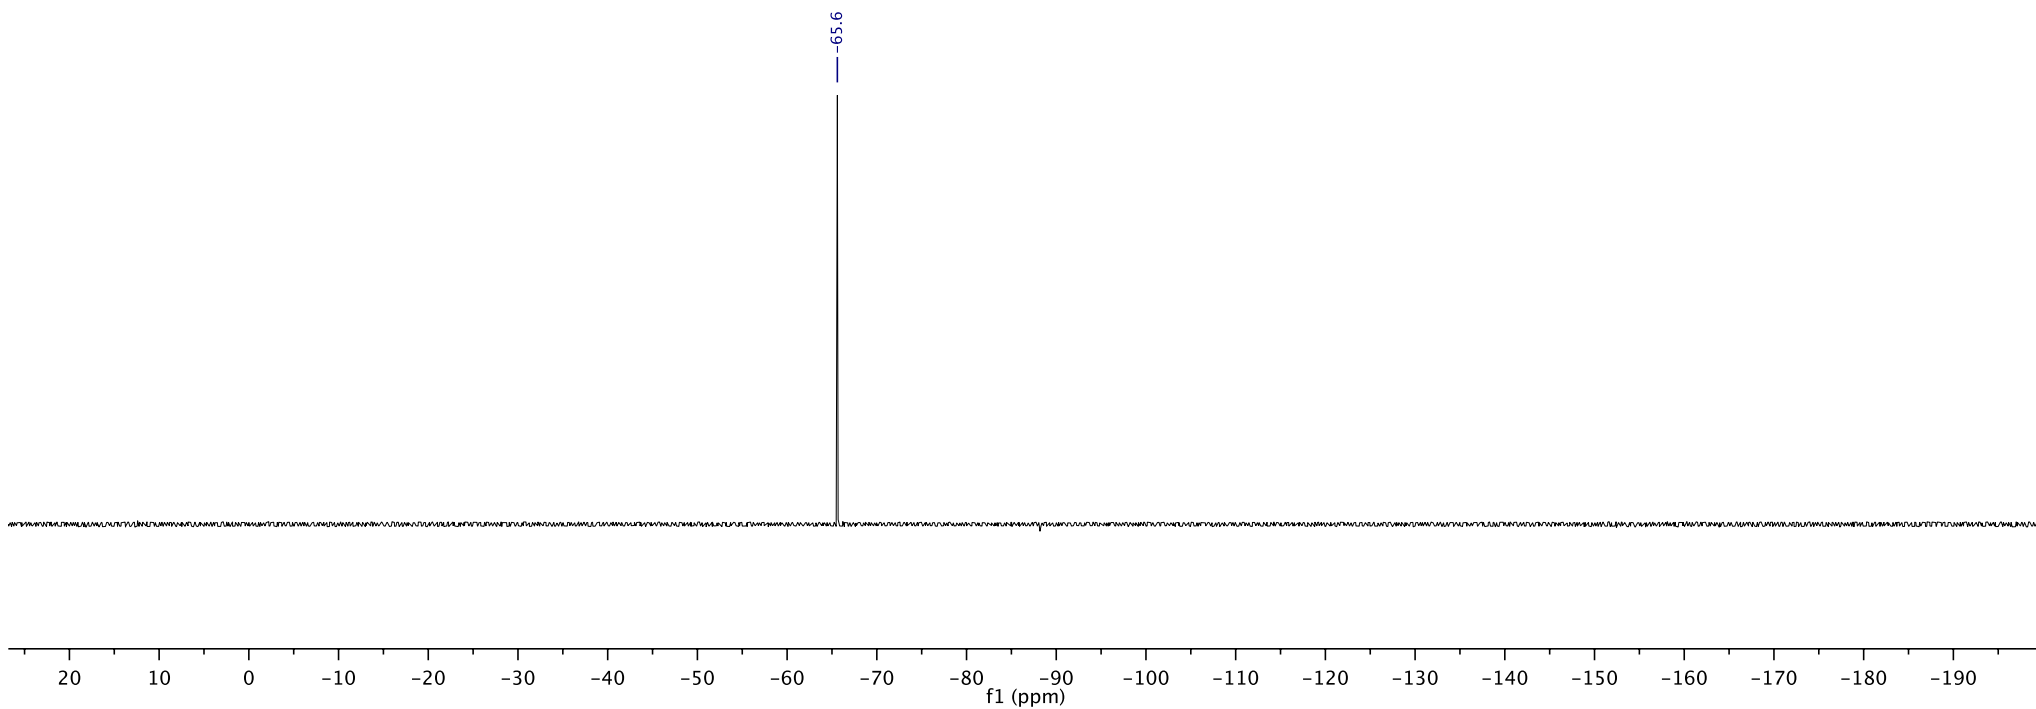

| Parameter              | Value               |
|------------------------|---------------------|
| Title                  | JLH-5-103A-C6F6     |
| Origin                 | Varian              |
| Solvent                | "cdcl3"             |
| Temperature            | 25.0                |
| Pulse Sequence         | s2pul               |
| Number of Scans        | 16                  |
| Receiver Gain          | 30                  |
| Relaxation Delay       | 1.0000              |
| Pulse Width            | 6.3333              |
| Acquisition Time       | 0.9856              |
| Acquisition Date       | 2016-08-31T23:40:31 |
| Spectrometer Frequency | 282.34              |
| Spectral Width         | 64935.1             |
| Lowest Frequency       | -58228.3            |
| Nucleus                | 19F                 |
| Acquired Size          | 64000               |
| Spectral Size          | 131072              |

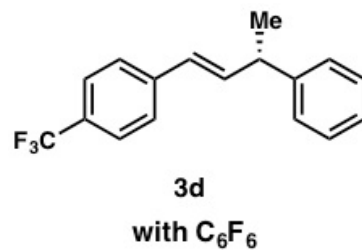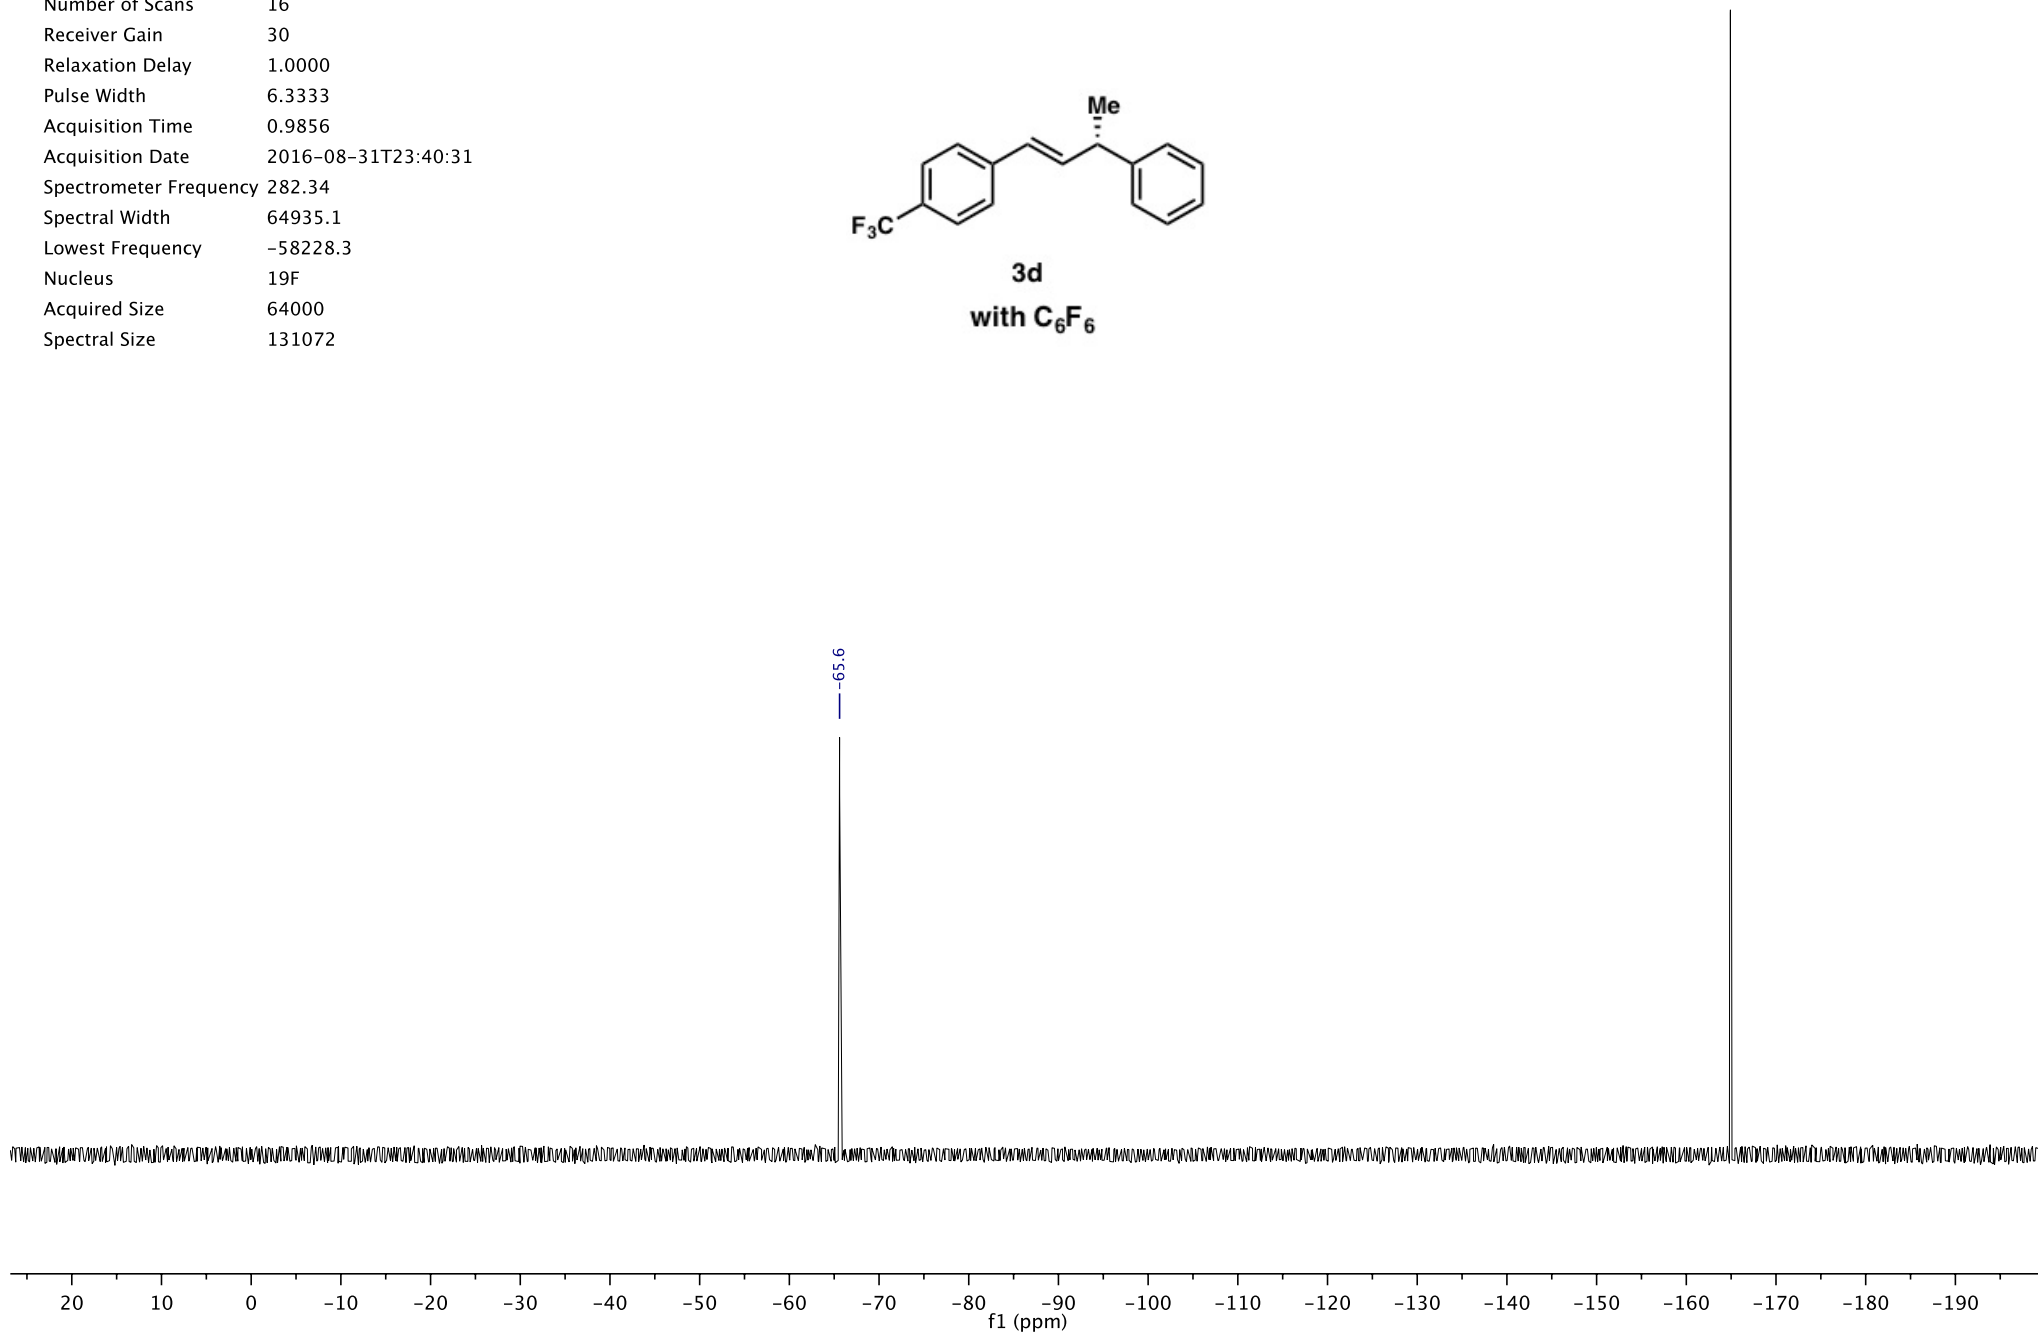

| Parameter              | Value                   |
|------------------------|-------------------------|
| Title                  | JLH-5-102A-column.1.fid |
| Origin                 | Bruker BioSpin GmbH     |
| Solvent                | CDCl3                   |
| Temperature            | 294.9                   |
| Pulse Sequence         | zg30                    |
| Number of Scans        | 16                      |
| Receiver Gain          | 30.3                    |
| Relaxation Delay       | 1.0000                  |
| Pulse Width            | 11.7000                 |
| Acquisition Time       | 4.0894                  |
| Acquisition Date       | 2016-07-21T01:59:17     |
| Spectrometer Frequency | 400.13                  |
| Spectral Width         | 8012.8                  |
| Lowest Frequency       | -1555.6                 |
| Nucleus                | <sup>1</sup> H          |
| Acquired Size          | 32768                   |
| Spectral Size          | 65536                   |

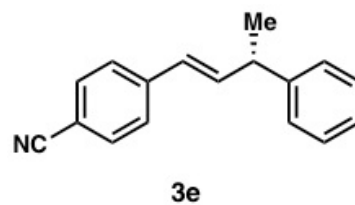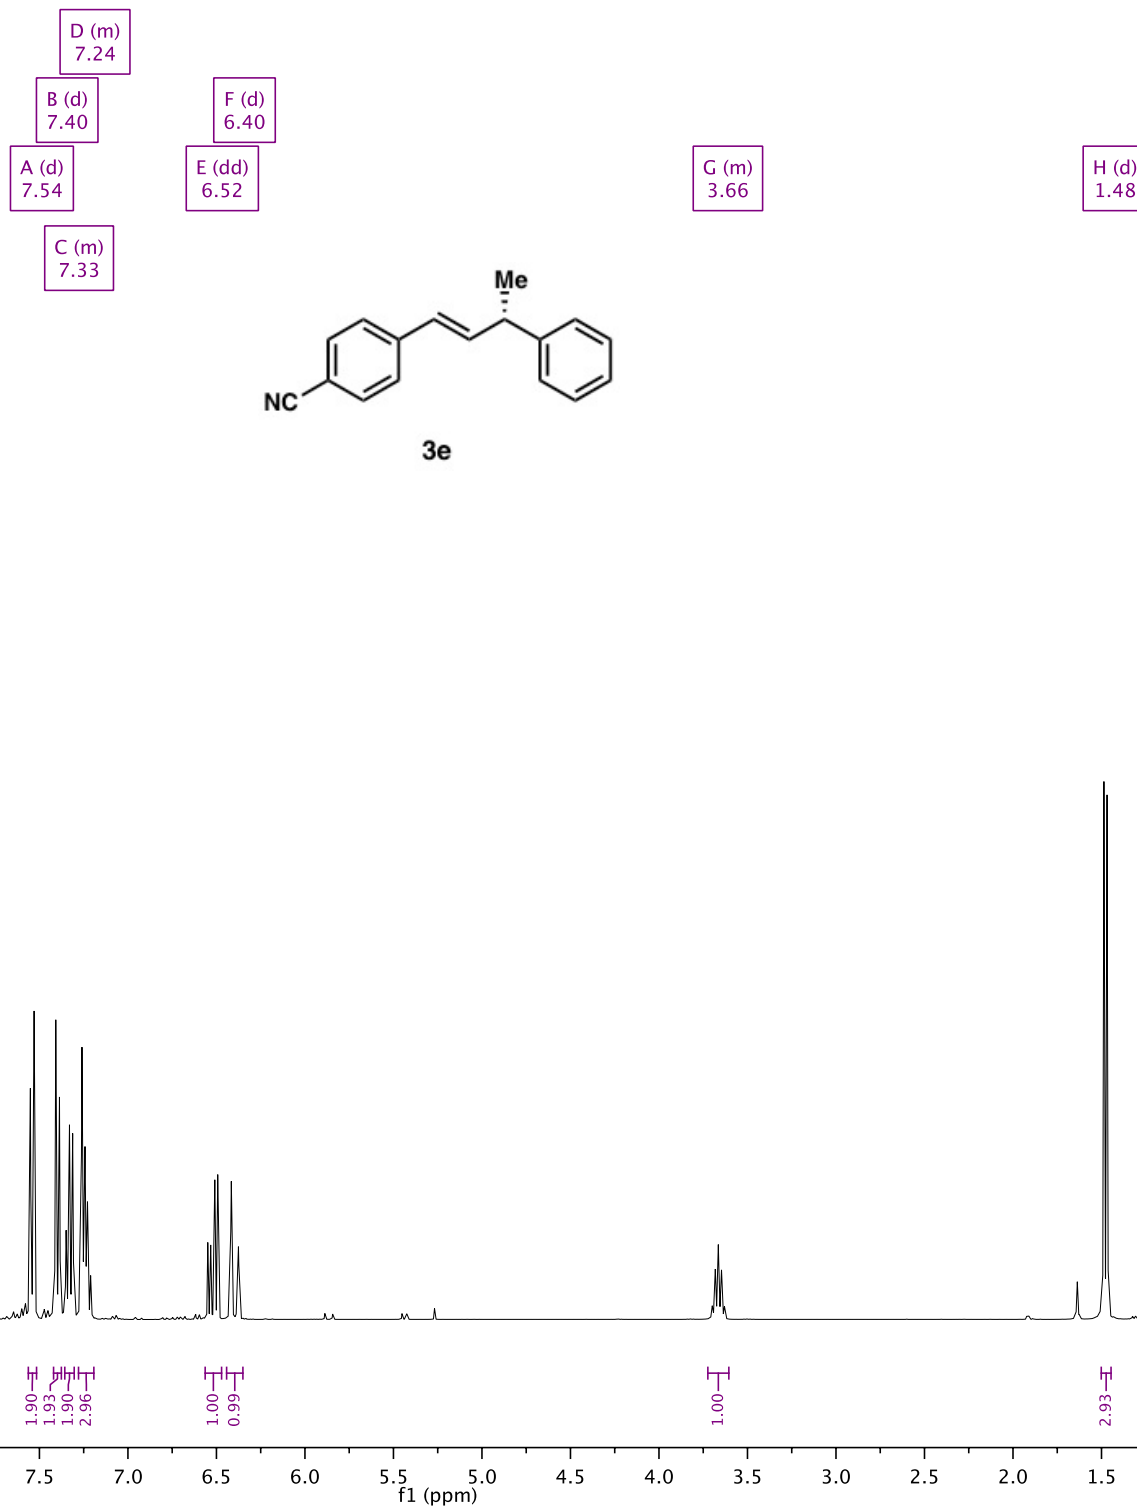

| Parameter              | Value                   |
|------------------------|-------------------------|
| Title                  | JLH-5-102A-column.2.fid |
| Origin                 | Bruker BioSpin GmbH     |
| Solvent                | CDCl3                   |
| Temperature            | 295.0                   |
| Pulse Sequence         | zgpg30                  |
| Number of Scans        | 128                     |
| Receiver Gain          | 78.7                    |
| Relaxation Delay       | 2.0000                  |
| Pulse Width            | 10.0000                 |
| Acquisition Time       | 1.3631                  |
| Acquisition Date       | 2016-07-21T02:07:07     |
| Spectrometer Frequency | 100.62                  |
| Spectral Width         | 24038.5                 |
| Lowest Frequency       | -1955.3                 |
| Nucleus                | <sup>13</sup> C         |
| Acquired Size          | 32768                   |
| Spectral Size          | 65536                   |

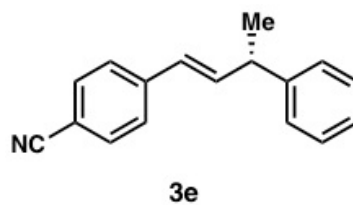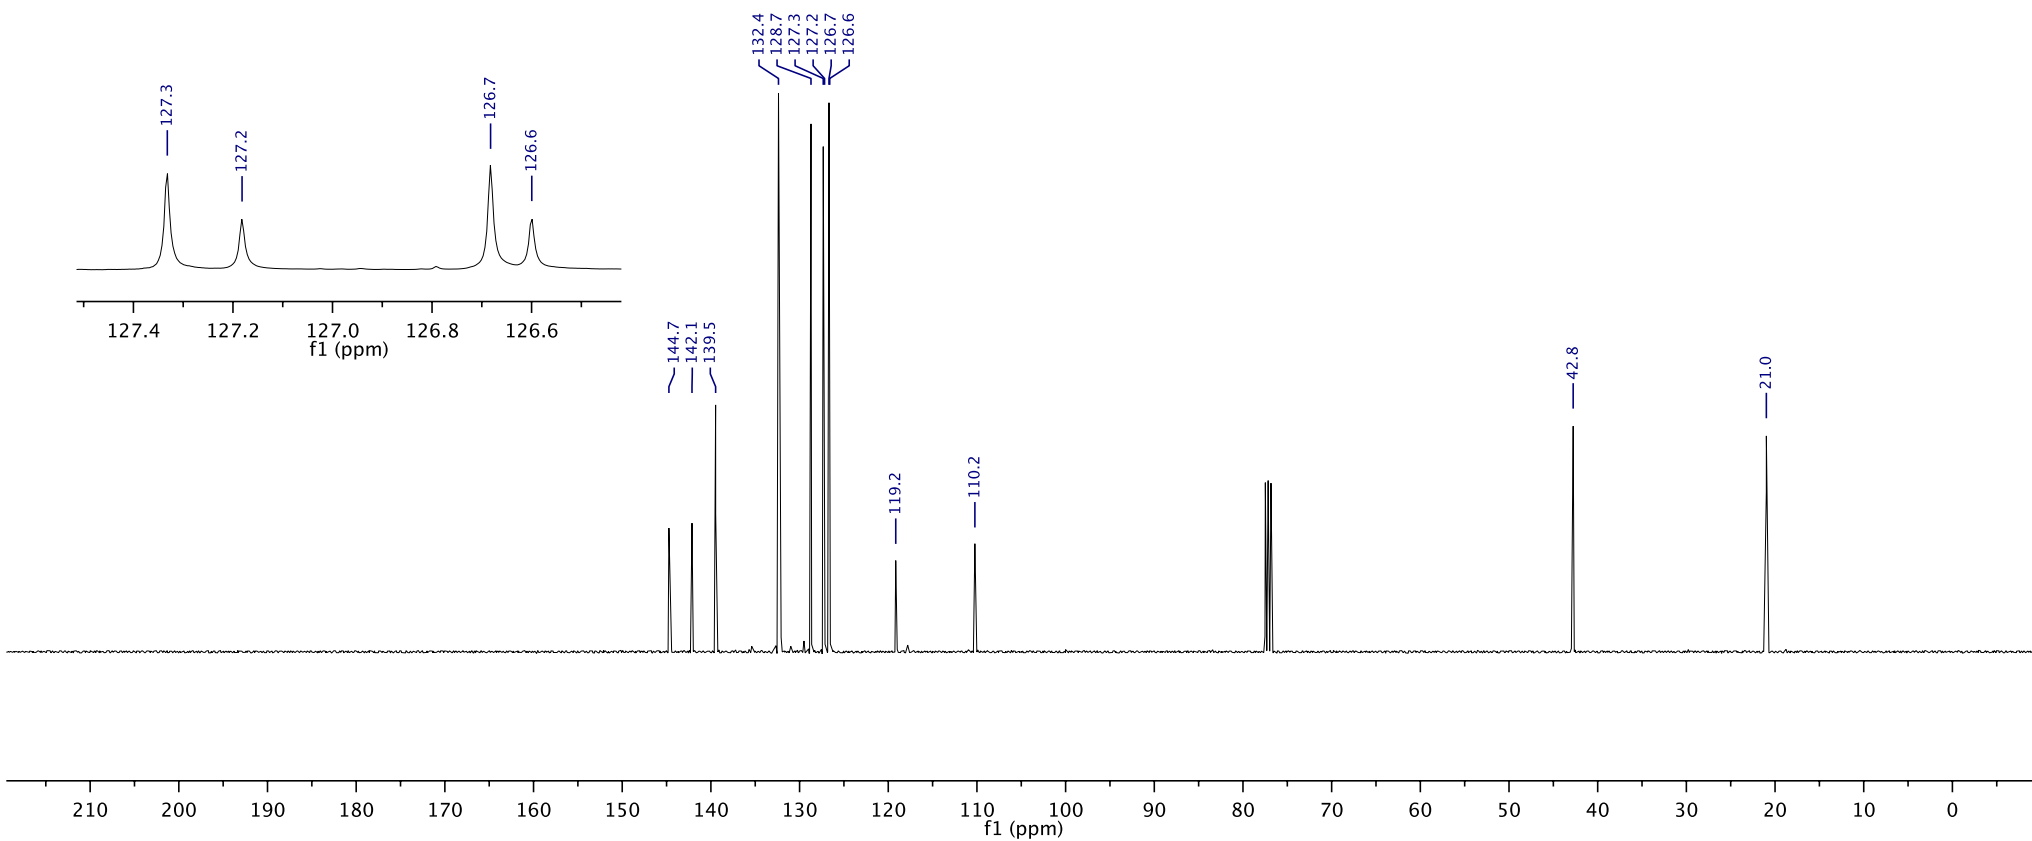

| Parameter              | Value                |
|------------------------|----------------------|
| Title                  | KEP-2-223_pure.1.fid |
| Origin                 | Bruker BioSpin GmbH  |
| Solvent                | CDCl3                |
| Temperature            | 294.9                |
| Pulse Sequence         | zg30                 |
| Number of Scans        | 16                   |
| Receiver Gain          | 78.7                 |
| Relaxation Delay       | 1.0000               |
| Pulse Width            | 11.7000              |
| Acquisition Time       | 4.0894               |
| Acquisition Date       | 2016-08-19T04:09:06  |
| Spectrometer Frequency | 400.13               |
| Spectral Width         | 8012.8               |
| Lowest Frequency       | -1555.6              |
| Nucleus                | 1H                   |
| Acquired Size          | 32768                |
| Spectral Size          | 65536                |

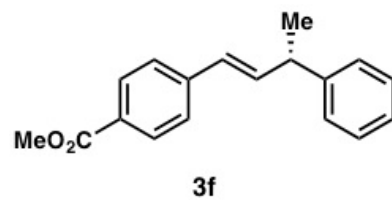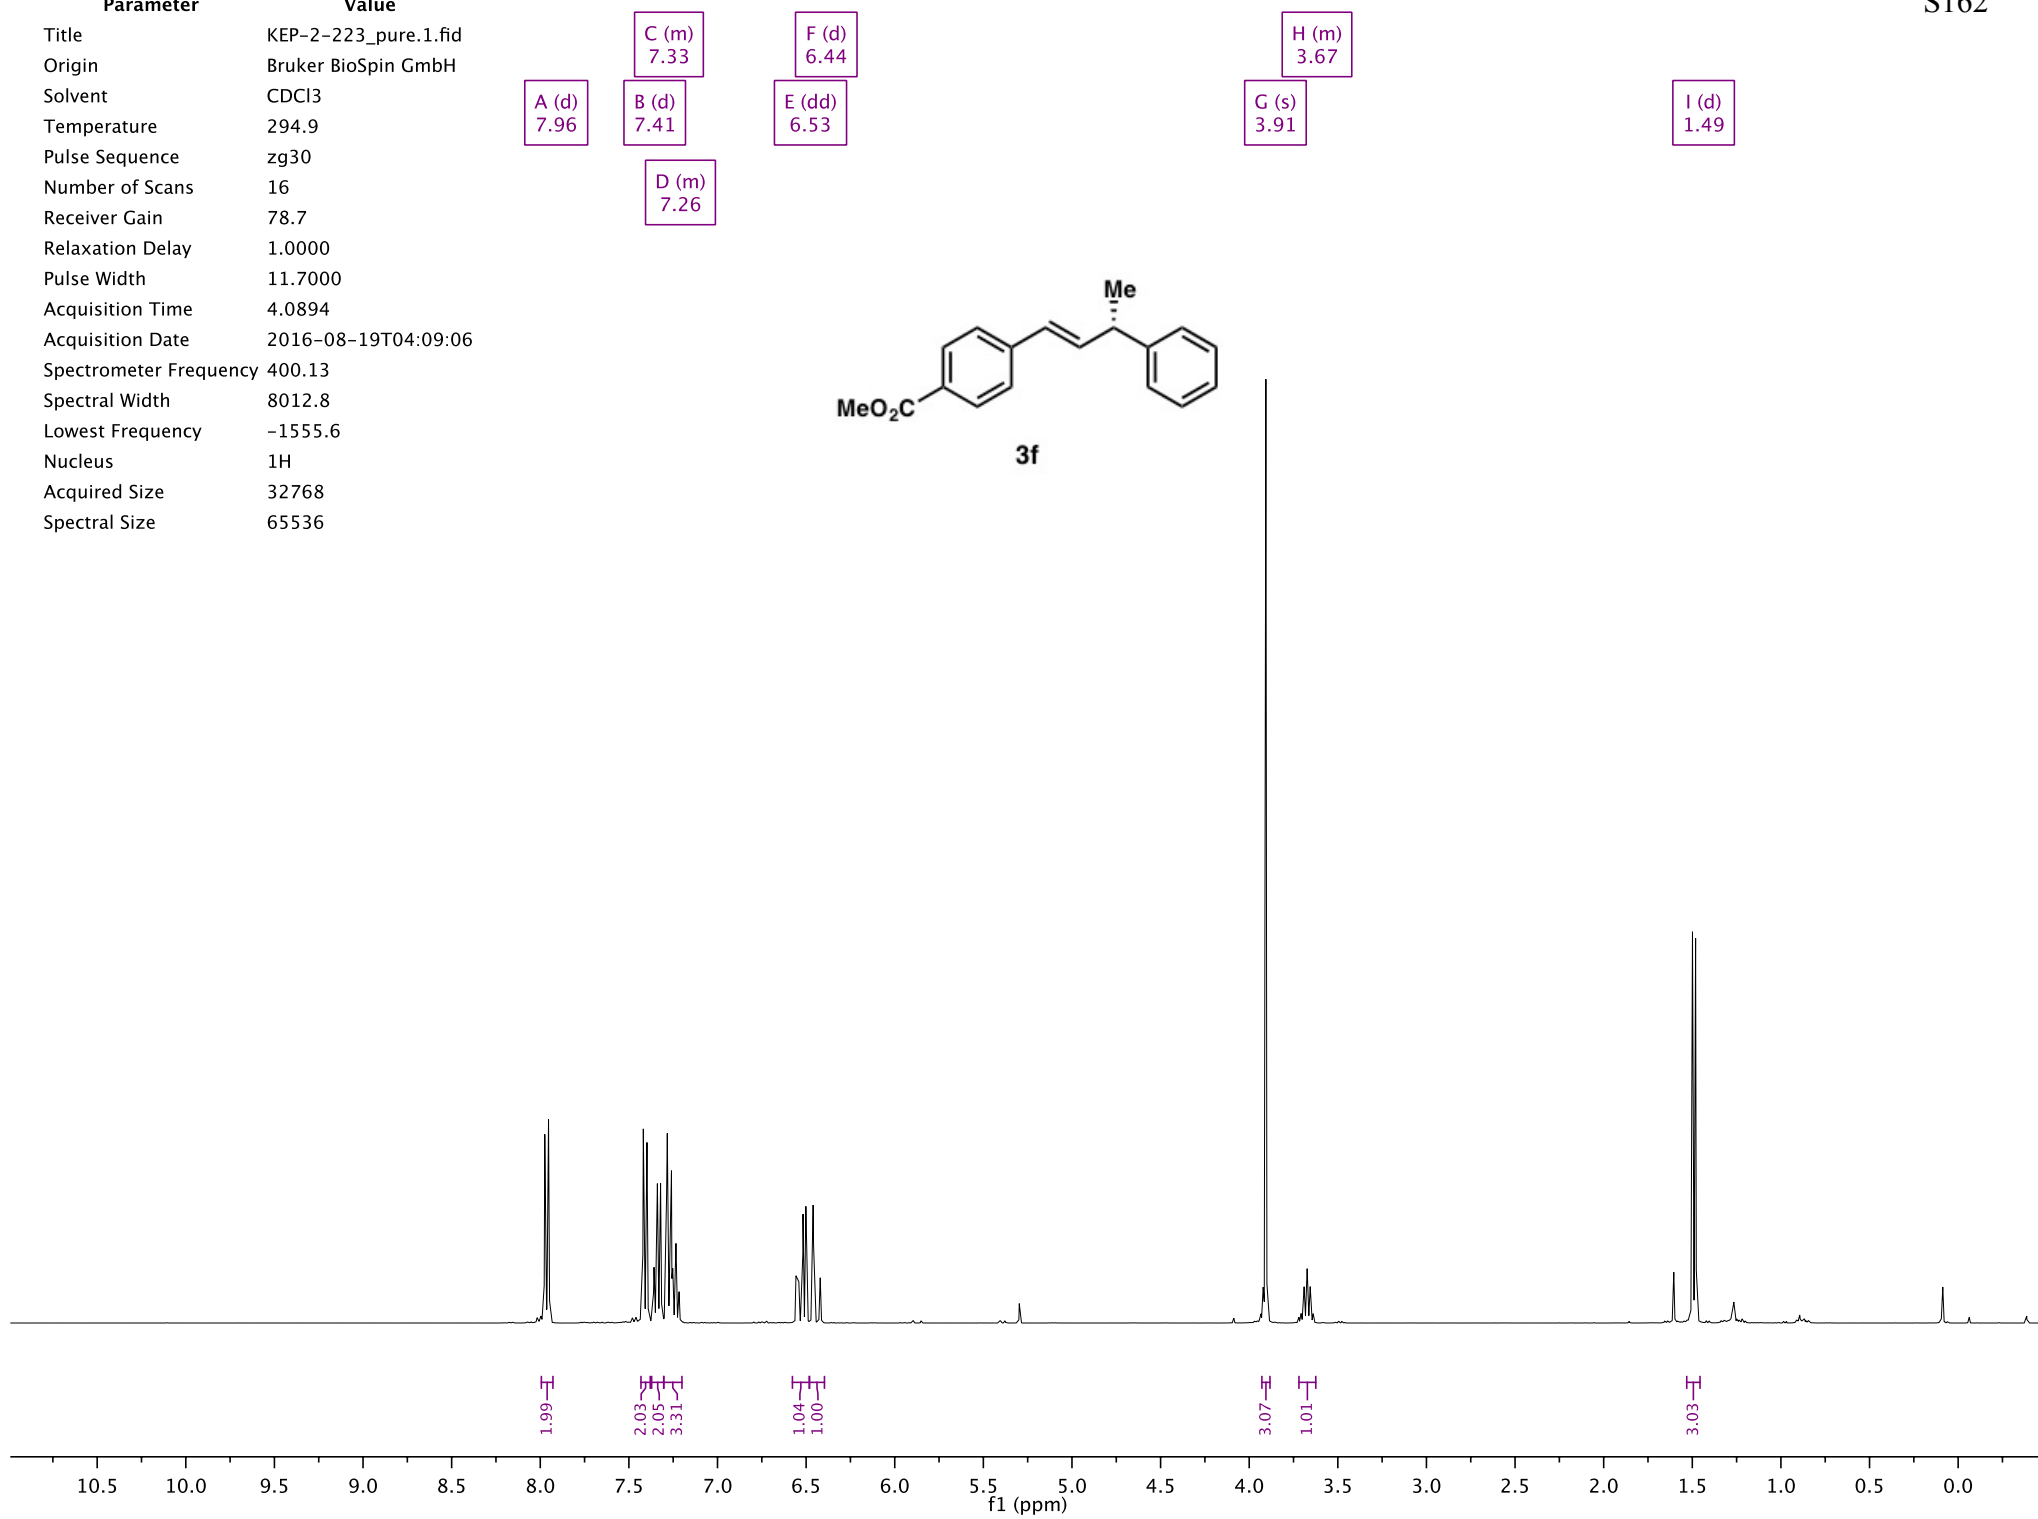

| Parameter              | Value                |
|------------------------|----------------------|
| Title                  | KEP-2-223_pure.2.fid |
| Origin                 | Bruker BioSpin GmbH  |
| Solvent                | CDCl3                |
| Temperature            | 294.9                |
| Pulse Sequence         | zgpg30               |
| Number of Scans        | 128                  |
| Receiver Gain          | 87.8                 |
| Relaxation Delay       | 2.0000               |
| Pulse Width            | 10.0000              |
| Acquisition Time       | 1.3631               |
| Acquisition Date       | 2016-08-19T04:16:57  |
| Spectrometer Frequency | 100.62               |
| Spectral Width         | 24038.5              |
| Lowest Frequency       | -1936.8              |
| Nucleus                | <sup>13</sup> C      |
| Acquired Size          | 32768                |
| Spectral Size          | 65536                |

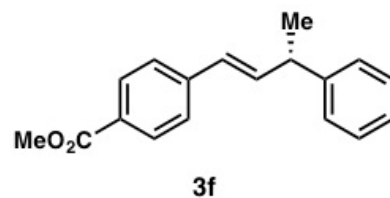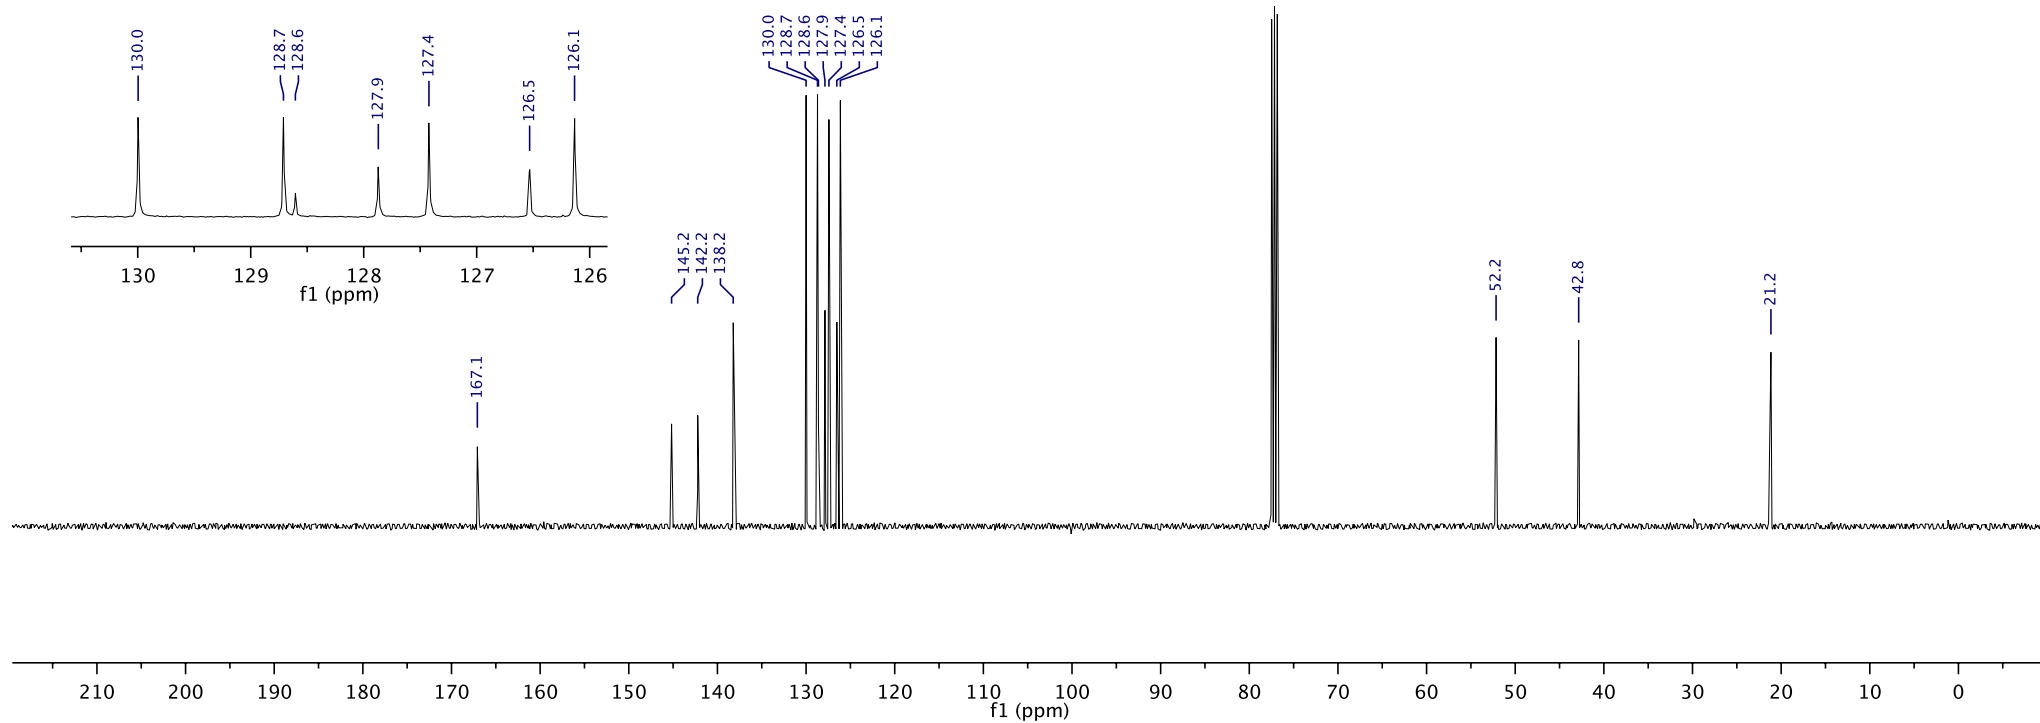

| Parameter              | Value                      |
|------------------------|----------------------------|
| Title                  | JLH-6-027A-column-CH.1.fid |
| Origin                 | Bruker BioSpin GmbH        |
| Solvent                | CDCl3                      |
| Temperature            | 294.9                      |
| Pulse Sequence         | zg30                       |
| Number of Scans        | 16                         |
| Receiver Gain          | 30.3                       |
| Relaxation Delay       | 1.0000                     |
| Pulse Width            | 11.7000                    |
| Acquisition Time       | 4.0894                     |
| Acquisition Date       | 2016-12-23T14:59:22        |
| Spectrometer Frequency | 400.13                     |
| Spectral Width         | 8012.8                     |
| Lowest Frequency       | -1535.6                    |
| Nucleus                | <sup>1</sup> H             |
| Acquired Size          | 32768                      |
| Spectral Size          | 65536                      |

|       |       |       |       |       |       |       |
|-------|-------|-------|-------|-------|-------|-------|
|       | C (m) |       |       |       |       |       |
|       | 7.25  |       |       |       |       |       |
| A (d) | B (m) | D (d) | E (m) | F (m) | G (s) | H (d) |
| 7.70  | 7.32  | 6.90  | 6.35  | 3.63  | 2.45  | 1.46  |

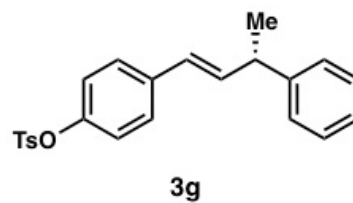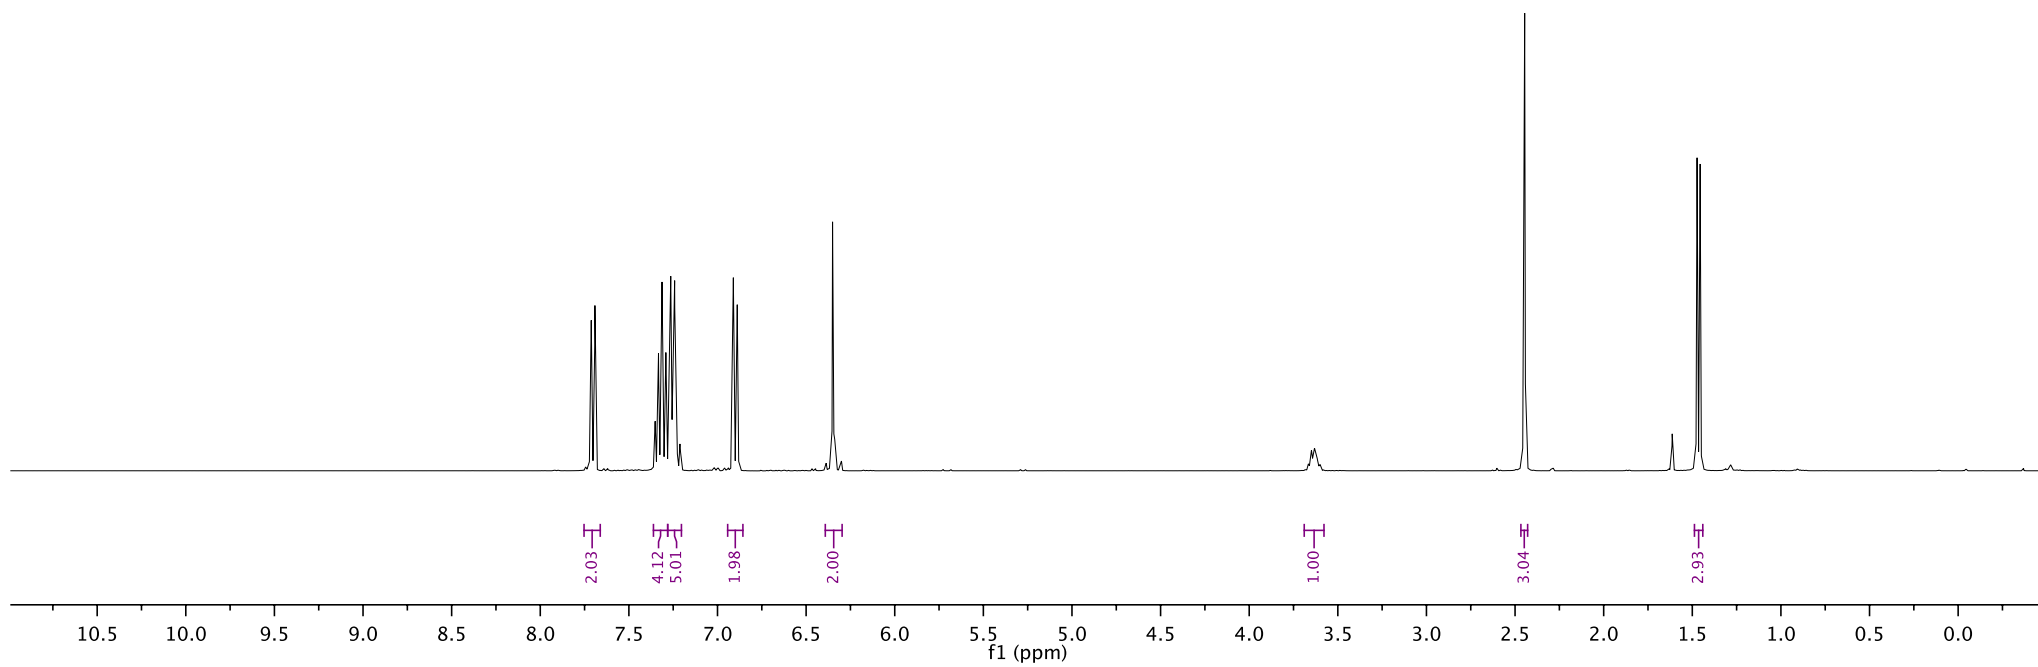



| Parameter              | Value                      |
|------------------------|----------------------------|
| Title                  | JLH-6-027A-column-CH.2.fid |
| Origin                 | Bruker BioSpin GmbH        |
| Solvent                | CDCl3                      |
| Temperature            | 295.0                      |
| Pulse Sequence         | zgpg30                     |
| Number of Scans        | 128                        |
| Receiver Gain          | 64.2                       |
| Relaxation Delay       | 2.0000                     |
| Pulse Width            | 10.0000                    |
| Acquisition Time       | 1.3631                     |
| Acquisition Date       | 2016-12-23T15:07:12        |
| Spectrometer Frequency | 100.62                     |
| Spectral Width         | 24038.5                    |
| Lowest Frequency       | -1958.0                    |
| Nucleus                | 13C                        |
| Acquired Size          | 32768                      |
| Spectral Size          | 65536                      |

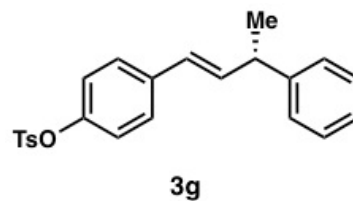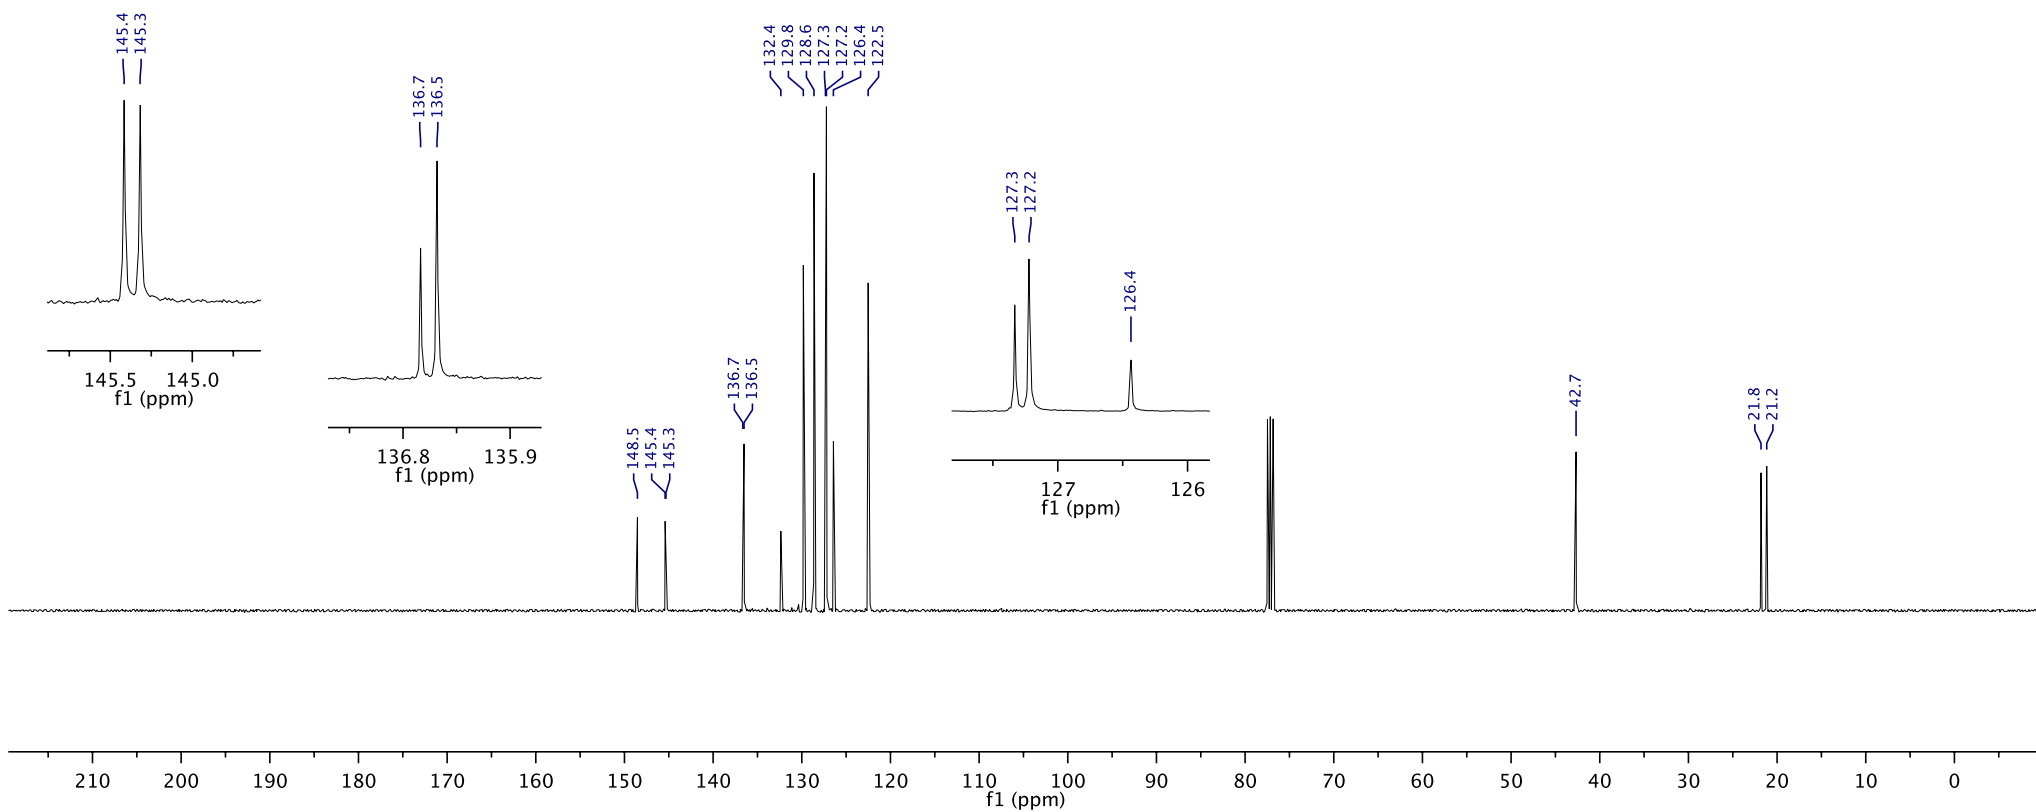

| Parameter              | Value               |
|------------------------|---------------------|
| Title                  | JLH-5-126.1.fid     |
| Origin                 | Bruker BioSpin GmbH |
| Solvent                | CDCl3               |
| Temperature            | 294.9               |
| Pulse Sequence         | zg30                |
| Number of Scans        | 16                  |
| Receiver Gain          | 30.3                |
| Relaxation Delay       | 1.0000              |
| Pulse Width            | 11.7000             |
| Acquisition Time       | 4.0894              |
| Acquisition Date       | 2016-08-19T13:43:12 |
| Spectrometer Frequency | 400.13              |
| Spectral Width         | 8012.8              |
| Lowest Frequency       | -1553.2             |
| Nucleus                | <sup>1</sup> H      |
| Acquired Size          | 32768               |
| Spectral Size          | 65536               |

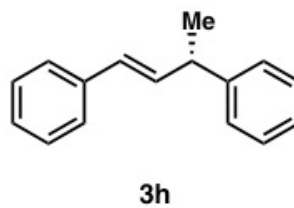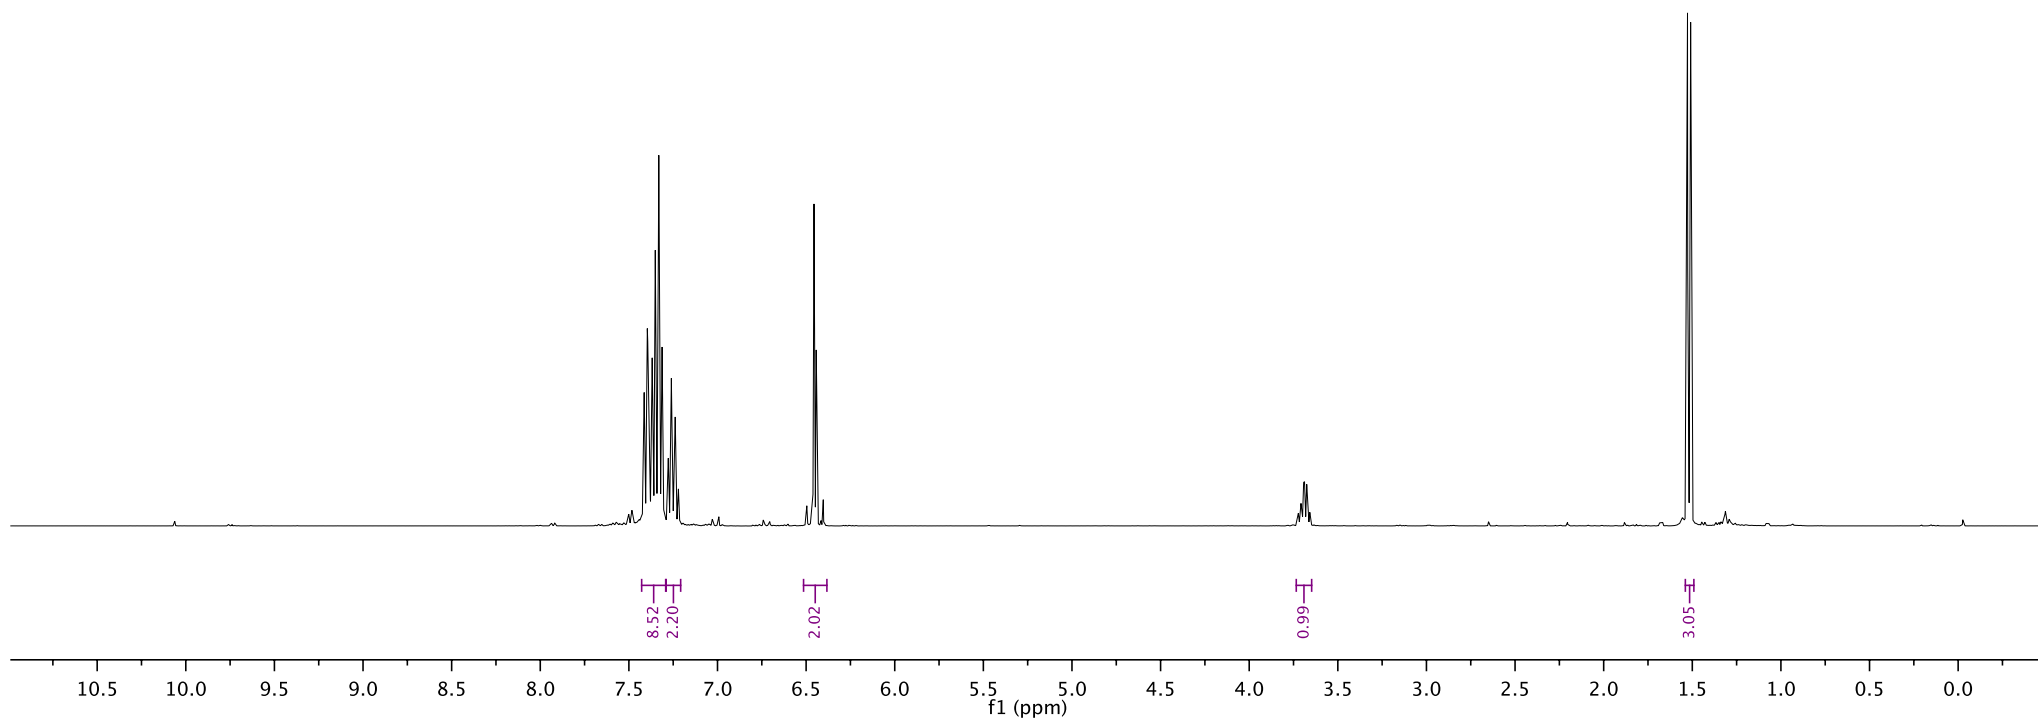

| Parameter              | Value               |
|------------------------|---------------------|
| Title                  | JLH-5-126.2.fid     |
| Origin                 | Bruker BioSpin GmbH |
| Solvent                | CDCl3               |
| Temperature            | 294.9               |
| Pulse Sequence         | zgpg30              |
| Number of Scans        | 128                 |
| Receiver Gain          | 72.0                |
| Relaxation Delay       | 2.0000              |
| Pulse Width            | 10.0000             |
| Acquisition Time       | 1.3631              |
| Acquisition Date       | 2016-08-19T13:51:02 |
| Spectrometer Frequency | 100.62              |
| Spectral Width         | 24038.5             |
| Lowest Frequency       | -1943.9             |
| Nucleus                | <sup>13</sup> C     |
| Acquired Size          | 32768               |
| Spectral Size          | 65536               |

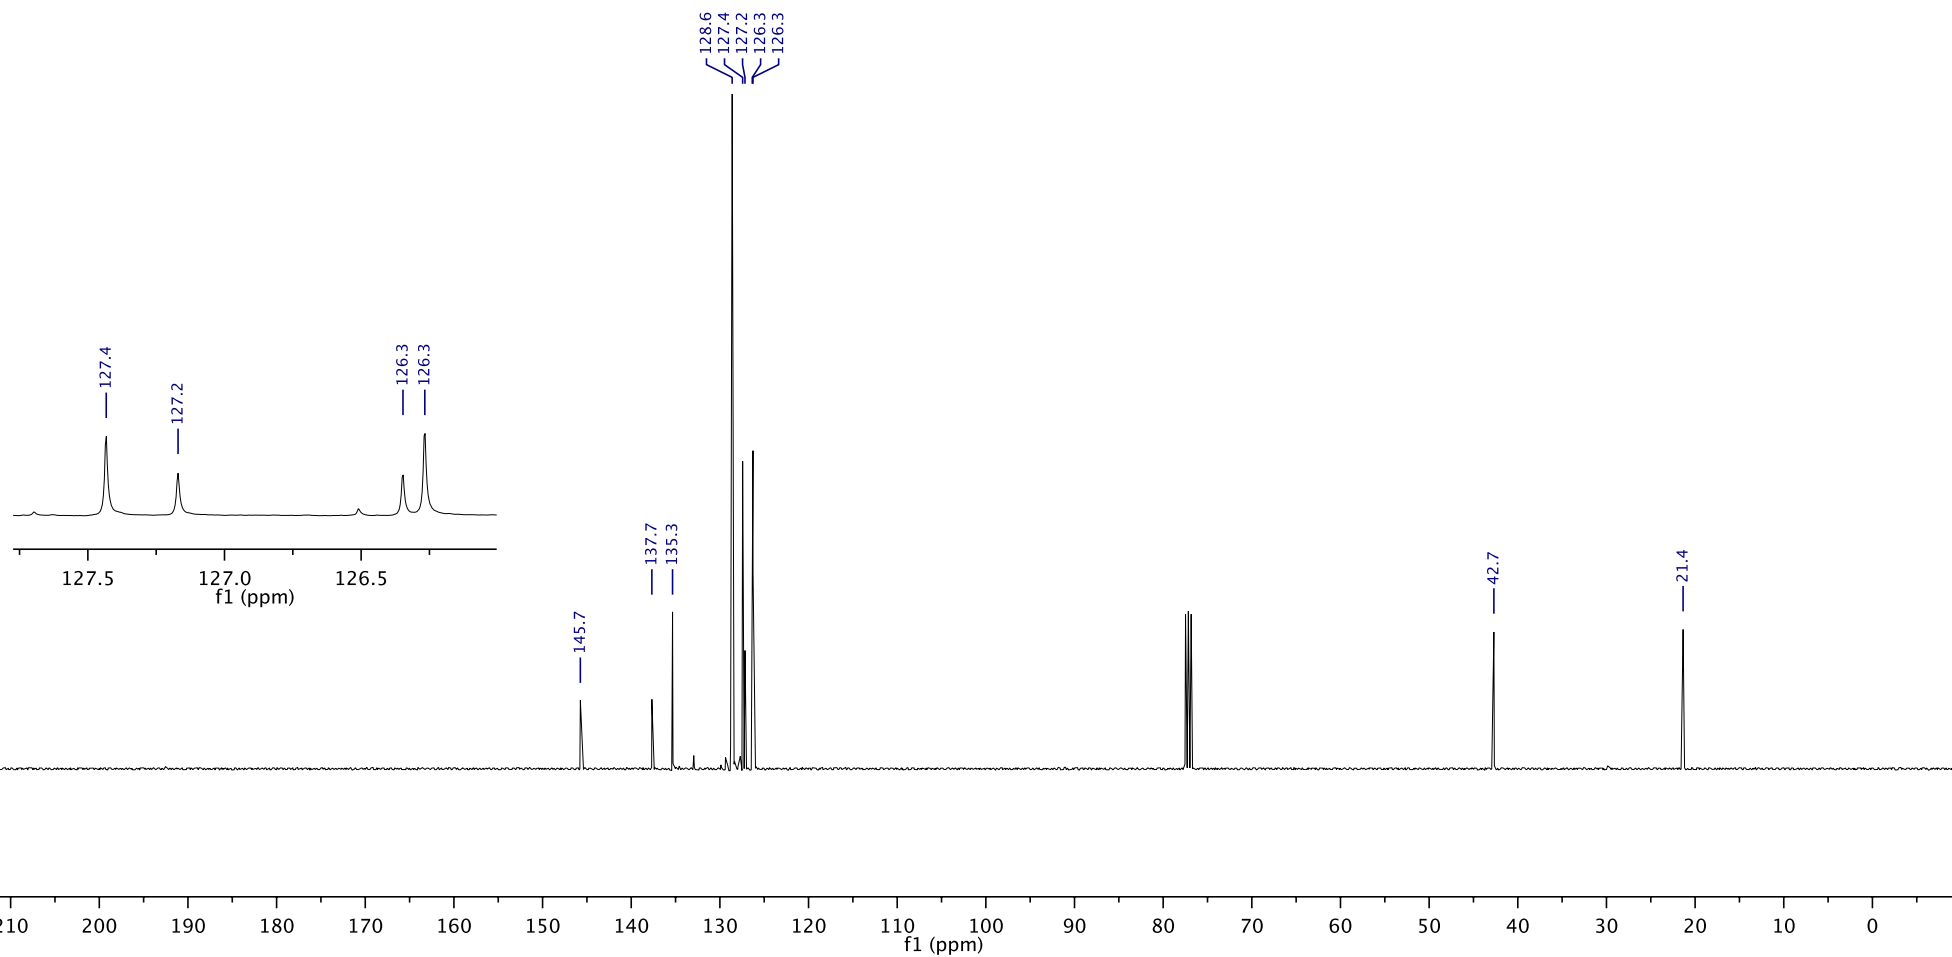

| Parameter              | Value               |
|------------------------|---------------------|
| Title                  | KEP-250-B.1.fid     |
| Origin                 | Bruker BioSpin GmbH |
| Solvent                | CDCl3               |
| Temperature            | 294.9               |
| Pulse Sequence         | zg30                |
| Number of Scans        | 16                  |
| Receiver Gain          | 30.3                |
| Relaxation Delay       | 1.0000              |
| Pulse Width            | 11.7000             |
| Acquisition Time       | 4.0894              |
| Acquisition Date       | 2016-09-05T14:00:16 |
| Spectrometer Frequency | 400.13              |
| Spectral Width         | 8012.8              |
| Lowest Frequency       | -1555.6             |
| Nucleus                | 1H                  |
| Acquired Size          | 32768               |
| Spectral Size          | 65536               |

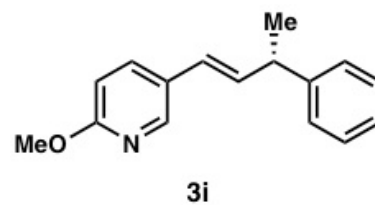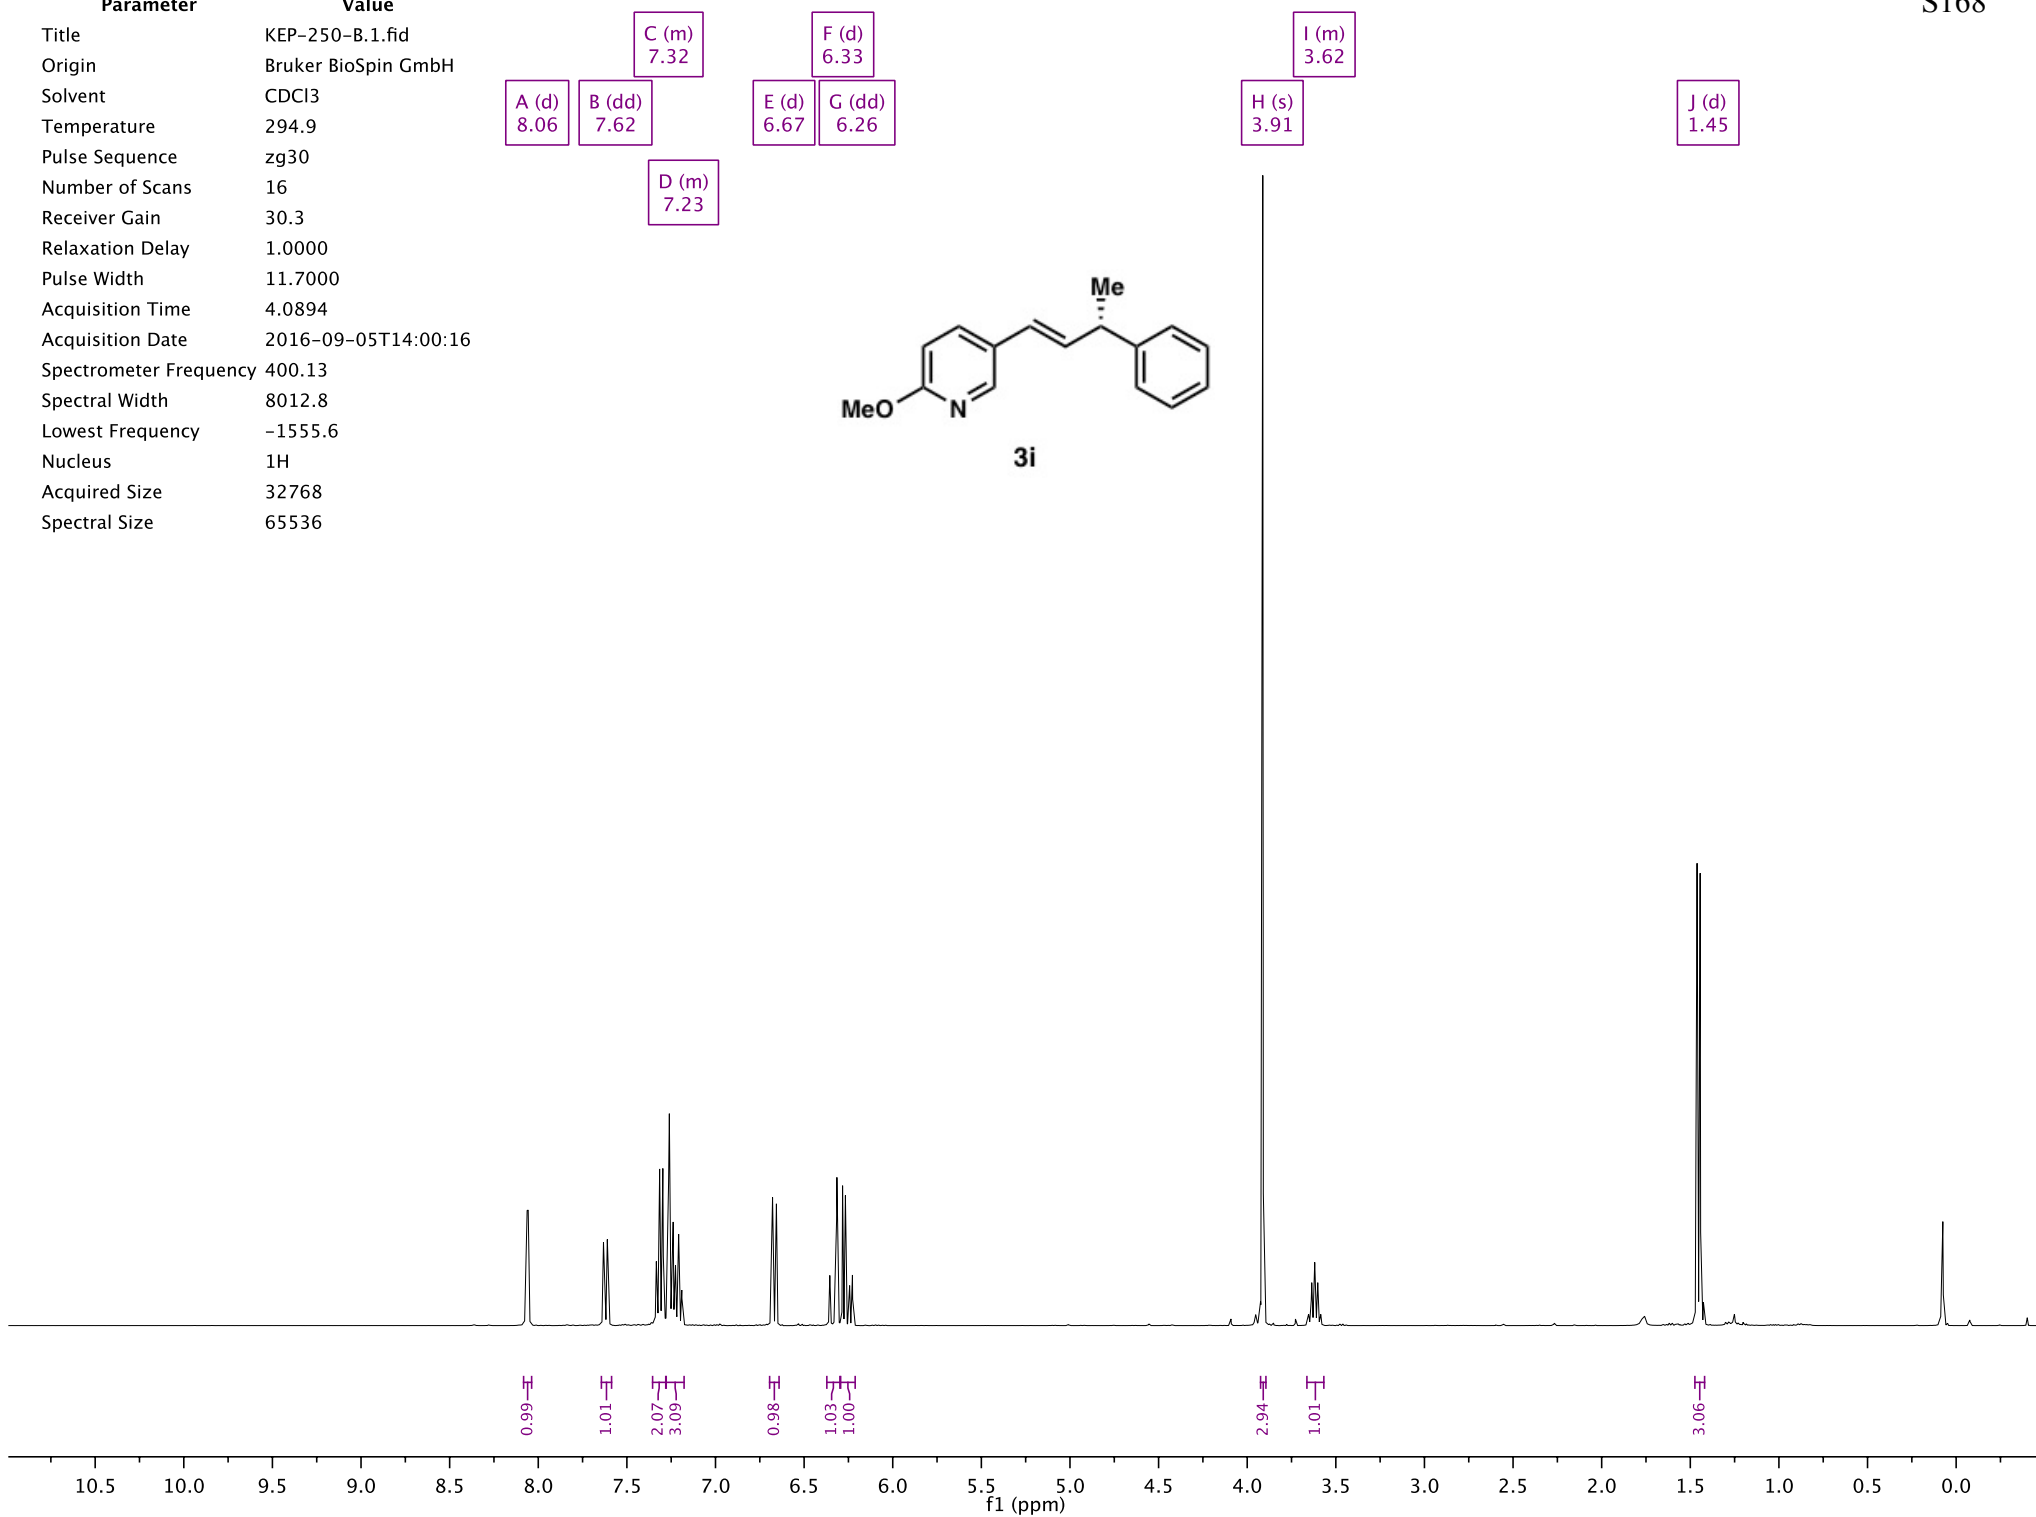

| Parameter              | Value               |
|------------------------|---------------------|
| Title                  | KEP-250-B.2.fid     |
| Origin                 | Bruker BioSpin GmbH |
| Solvent                | CDCl3               |
| Temperature            | 294.9               |
| Pulse Sequence         | zgpg30              |
| Number of Scans        | 128                 |
| Receiver Gain          | 64.2                |
| Relaxation Delay       | 2.0000              |
| Pulse Width            | 10.0000             |
| Acquisition Time       | 1.3631              |
| Acquisition Date       | 2016-09-05T14:08:13 |
| Spectrometer Frequency | 100.62              |
| Spectral Width         | 24038.5             |
| Lowest Frequency       | -1830.5             |
| Nucleus                | 13C                 |
| Acquired Size          | 32768               |
| Spectral Size          | 65536               |

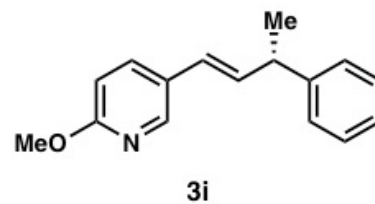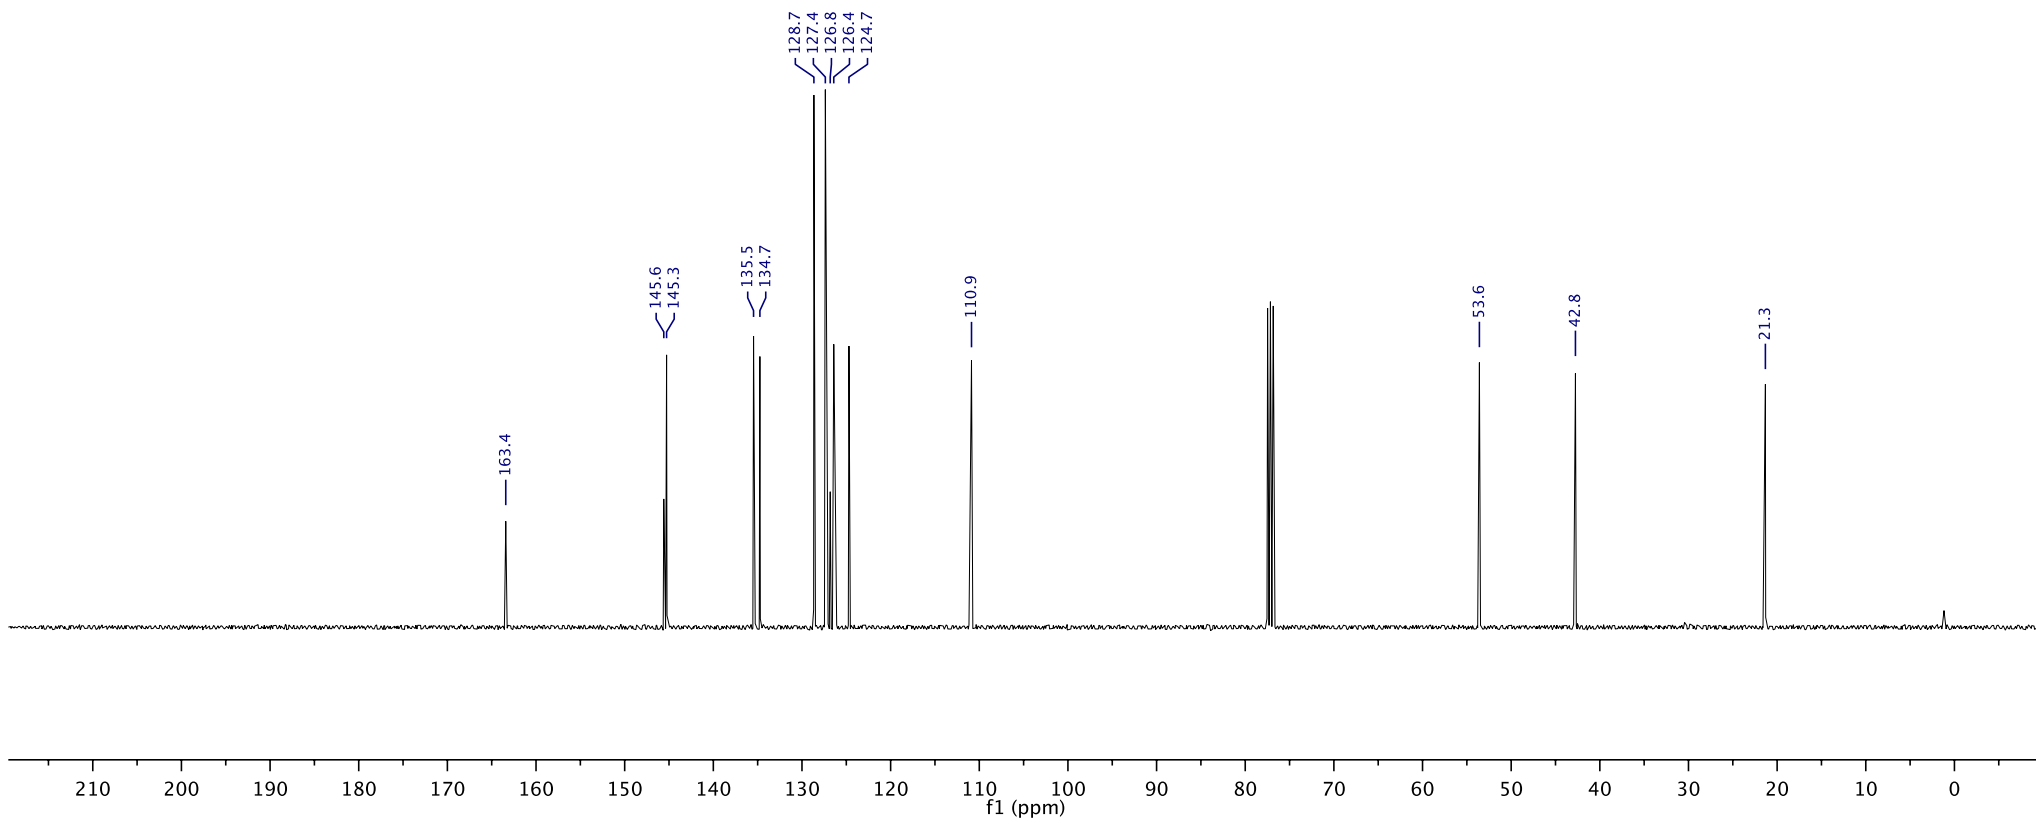

| Parameter              | Value                     |
|------------------------|---------------------------|
| Title                  | KEP-2-218_A_fr13-19.1.fid |
| Origin                 | Bruker BioSpin GmbH       |
| Solvent                | CDCl3                     |
| Temperature            | 294.9                     |
| Pulse Sequence         | zg30                      |
| Number of Scans        | 16                        |
| Receiver Gain          | 78.7                      |
| Relaxation Delay       | 1.0000                    |
| Pulse Width            | 11.7000                   |
| Acquisition Time       | 4.0894                    |
| Acquisition Date       | 2016-07-21T08:46:37       |
| Spectrometer Frequency | 400.13                    |
| Spectral Width         | 8012.8                    |
| Lowest Frequency       | -1555.6                   |
| Nucleus                | <sup>1</sup> H            |
| Acquired Size          | 32768                     |
| Spectral Size          | 65536                     |

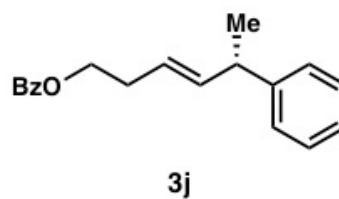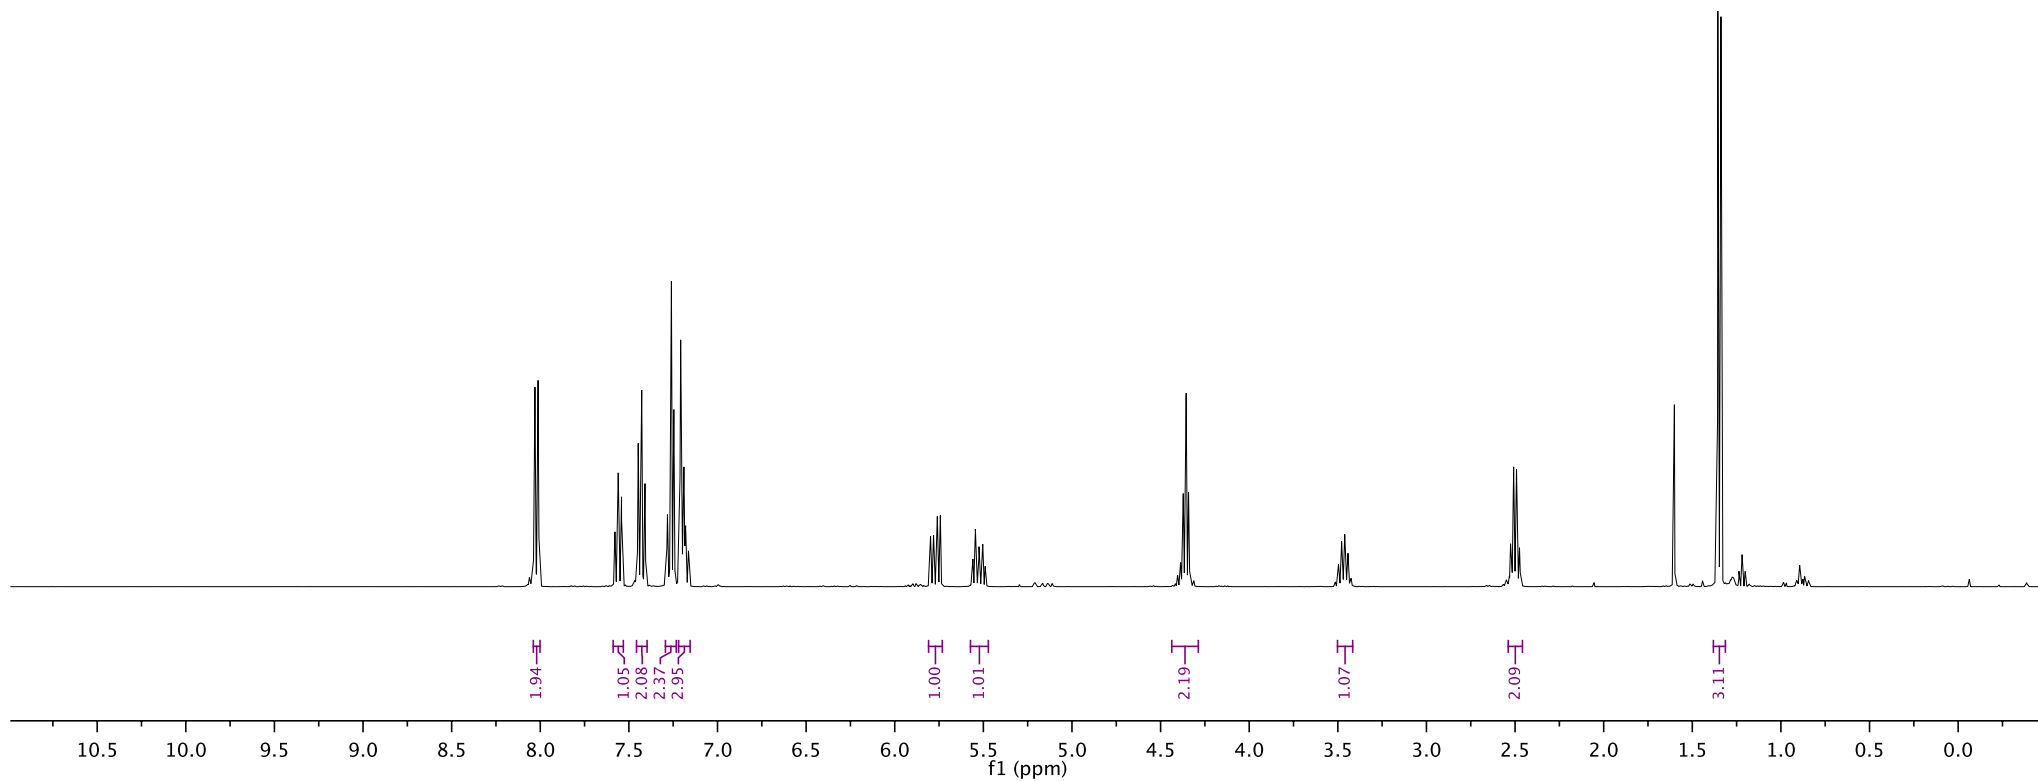

| Parameter              | Value                     |
|------------------------|---------------------------|
| Title                  | KEP-2-218_A_fr13-19.2.fid |
| Origin                 | Bruker BioSpin GmbH       |
| Solvent                | CDCl3                     |
| Temperature            | 295.0                     |
| Pulse Sequence         | zgpg30                    |
| Number of Scans        | 128                       |
| Receiver Gain          | 78.7                      |
| Relaxation Delay       | 2.0000                    |
| Pulse Width            | 10.0000                   |
| Acquisition Time       | 1.3631                    |
| Acquisition Date       | 2016-07-21T08:54:27       |
| Spectrometer Frequency | 100.62                    |
| Spectral Width         | 24038.5                   |
| Lowest Frequency       | -1936.2                   |
| Nucleus                | <sup>13</sup> C           |
| Acquired Size          | 32768                     |
| Spectral Size          | 65536                     |

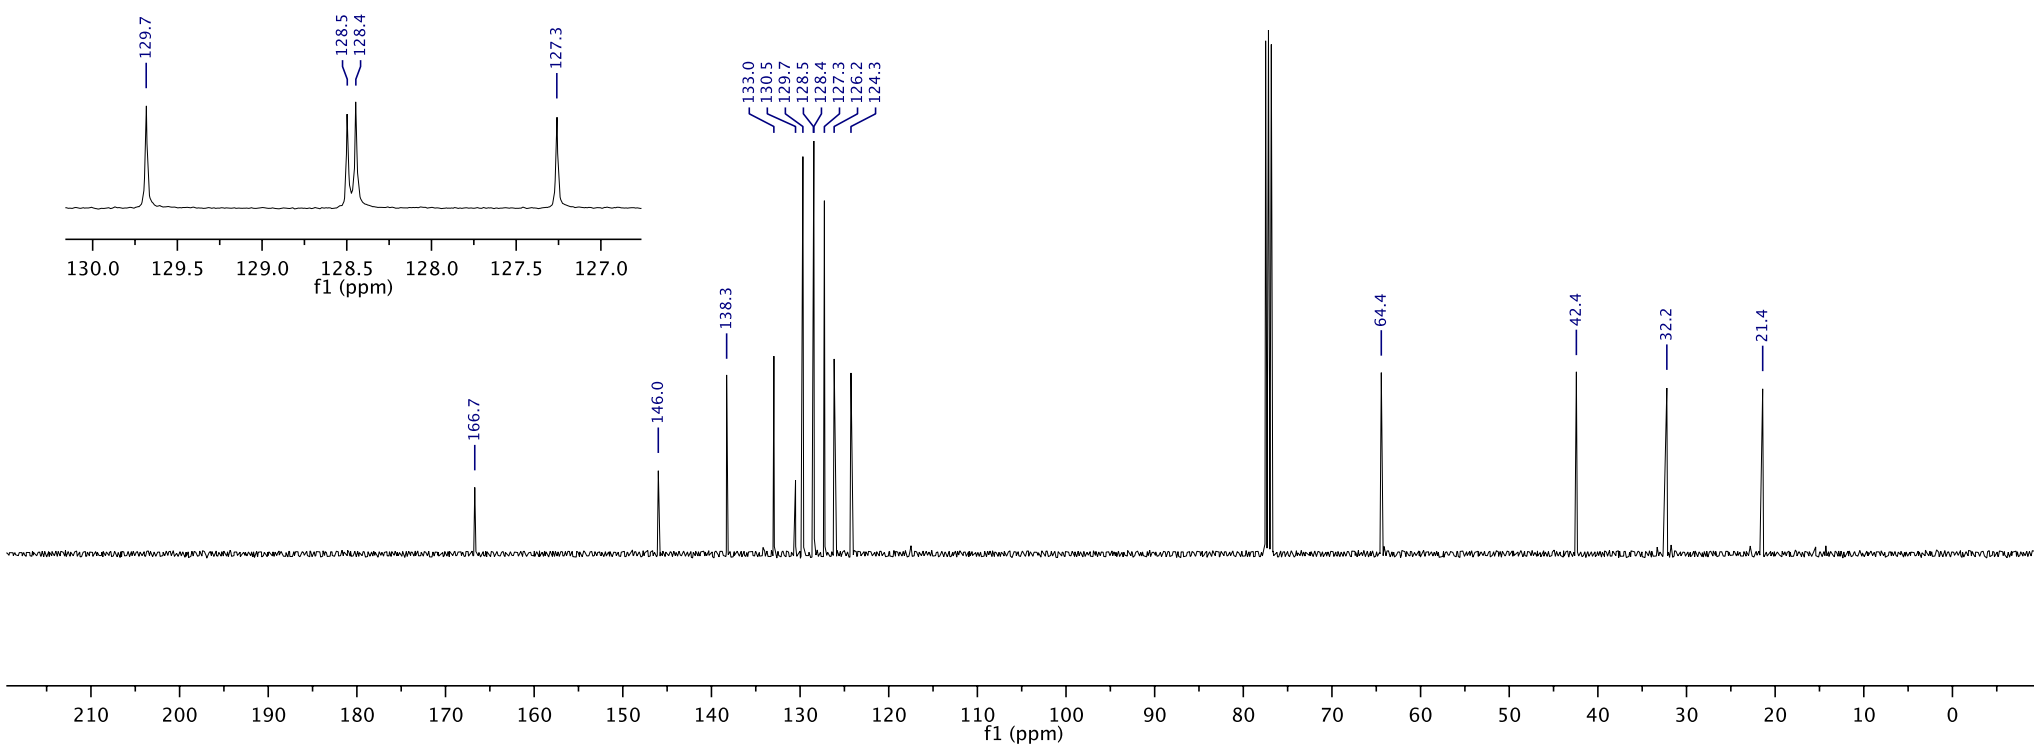

| Parameter              | Value               |
|------------------------|---------------------|
| Title                  | JLH-5-109B.1.fid    |
| Origin                 | Bruker BioSpin GmbH |
| Solvent                | CDCl3               |
| Temperature            | 294.9               |
| Pulse Sequence         | zg30                |
| Number of Scans        | 16                  |
| Receiver Gain          | 30.3                |
| Relaxation Delay       | 1.0000              |
| Pulse Width            | 11.7000             |
| Acquisition Time       | 4.0894              |
| Acquisition Date       | 2016-08-19T12:45:00 |
| Spectrometer Frequency | 400.13              |
| Spectral Width         | 8012.8              |
| Lowest Frequency       | -1555.6             |
| Nucleus                | 1H                  |
| Acquired Size          | 32768               |
| Spectral Size          | 65536               |

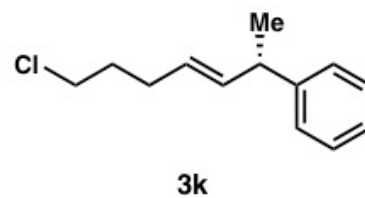

B (m)  
7.22

A (m)  
7.32

D (dtd)  
5.43

C (ddt)  
5.69

F (m)  
3.45

E (t)  
3.54

H (m)  
1.86

G (m)  
2.20

I (d)  
1.36

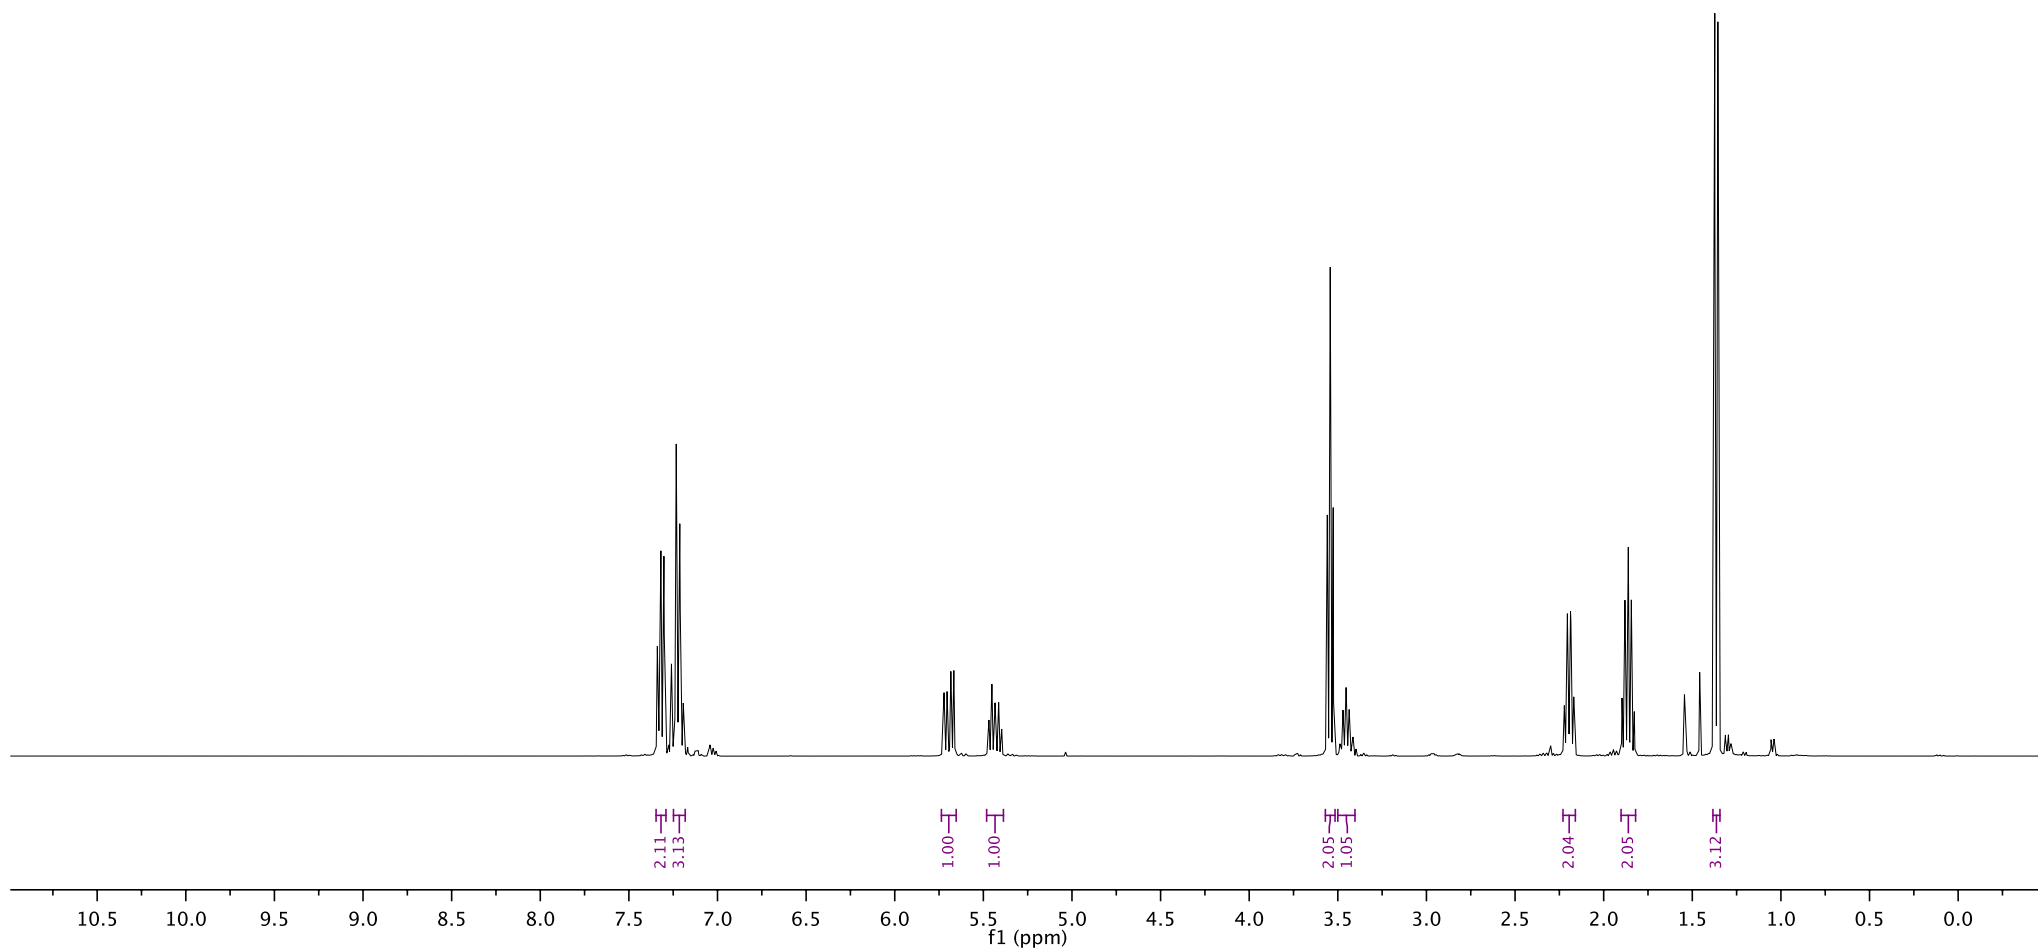



| Parameter              | Value               |
|------------------------|---------------------|
| Title                  | JLH-5-109B.2.fid    |
| Origin                 | Bruker BioSpin GmbH |
| Solvent                | CDCl3               |
| Temperature            | 295.0               |
| Pulse Sequence         | zgpg30              |
| Number of Scans        | 128                 |
| Receiver Gain          | 38.0                |
| Relaxation Delay       | 2.0000              |
| Pulse Width            | 10.0000             |
| Acquisition Time       | 1.3631              |
| Acquisition Date       | 2016-08-19T12:52:47 |
| Spectrometer Frequency | 100.62              |
| Spectral Width         | 24038.5             |
| Lowest Frequency       | -1939.6             |
| Nucleus                | <sup>13</sup> C     |
| Acquired Size          | 32768               |
| Spectral Size          | 65536               |

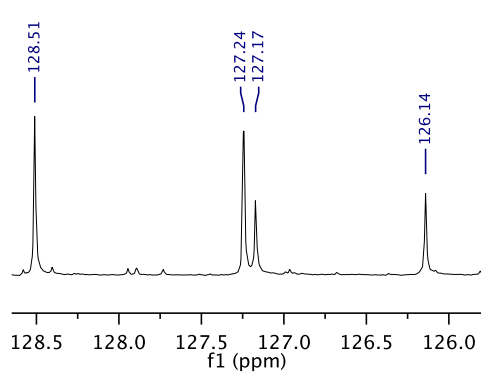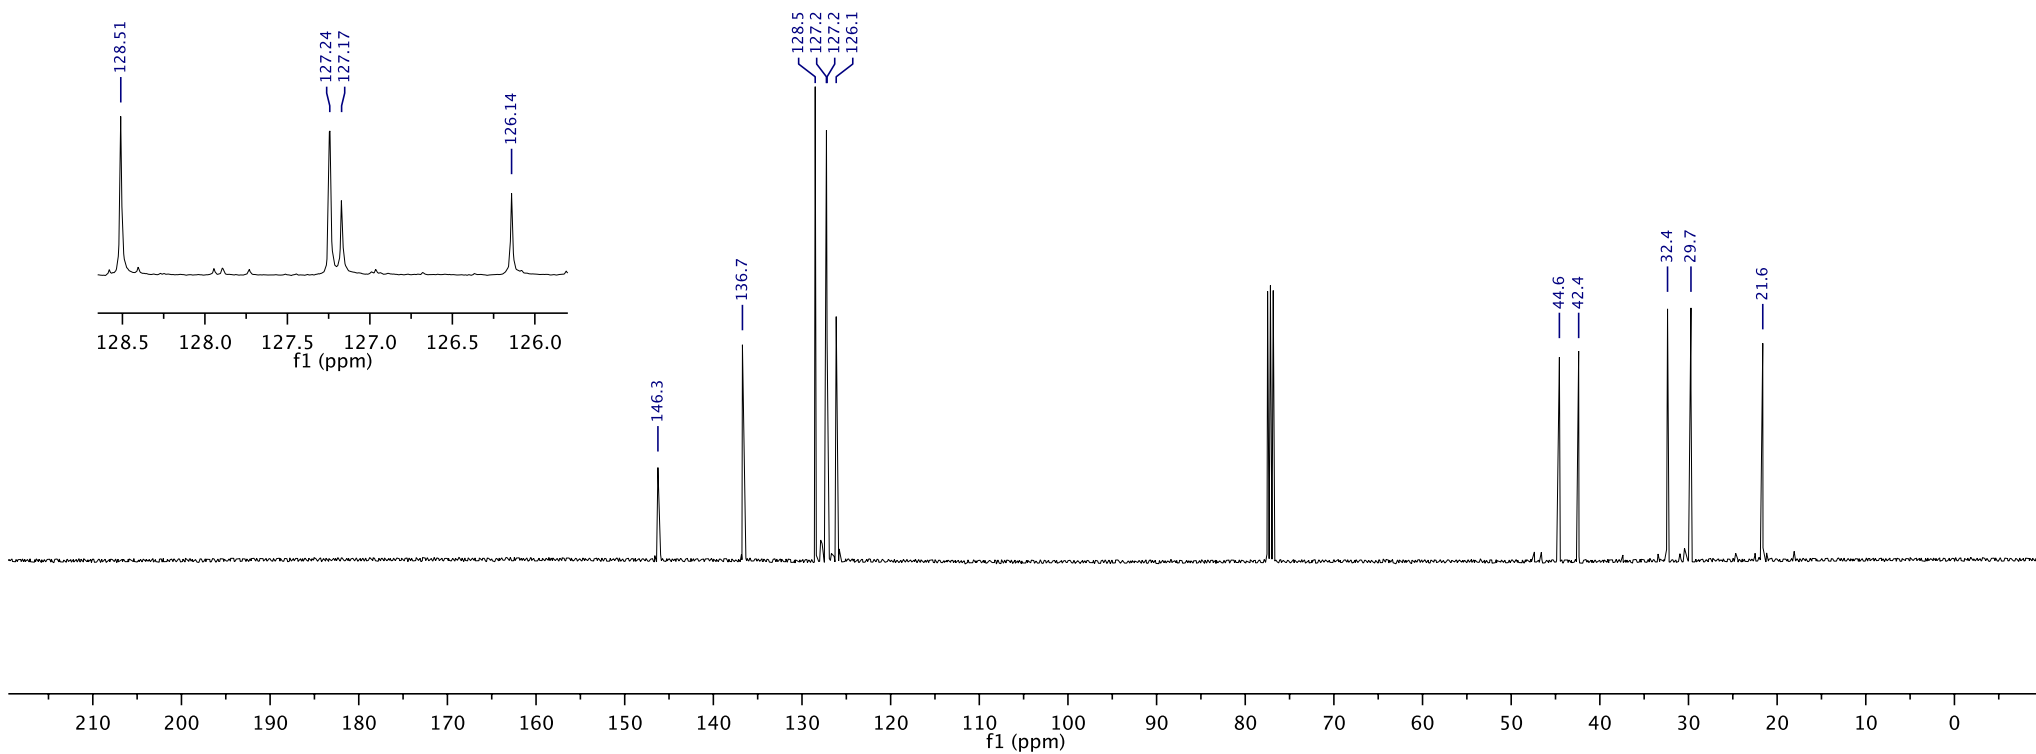

| Parameter              | Value                |
|------------------------|----------------------|
| Title                  | KEP-2-224_pure.1.fid |
| Origin                 | Bruker BioSpin GmbH  |
| Solvent                | CDCl3                |
| Temperature            | 294.9                |
| Pulse Sequence         | zg30                 |
| Number of Scans        | 16                   |
| Receiver Gain          | 64.2                 |
| Relaxation Delay       | 1.0000               |
| Pulse Width            | 11.7000              |
| Acquisition Time       | 4.0894               |
| Acquisition Date       | 2016-08-19T05:07:09  |
| Spectrometer Frequency | 400.13               |
| Spectral Width         | 8012.8               |
| Lowest Frequency       | -1535.6              |
| Nucleus                | <sup>1</sup> H       |
| Acquired Size          | 32768                |
| Spectral Size          | 65536                |

B (m)  
7.20D (dtd)  
5.46A (m)  
7.30C (ddt)  
5.60E (m)  
3.43F (m)  
2.02G (m)  
1.32H (m)  
0.89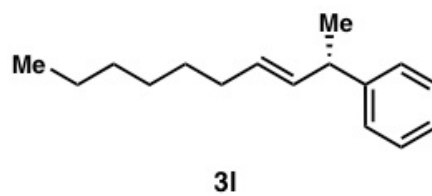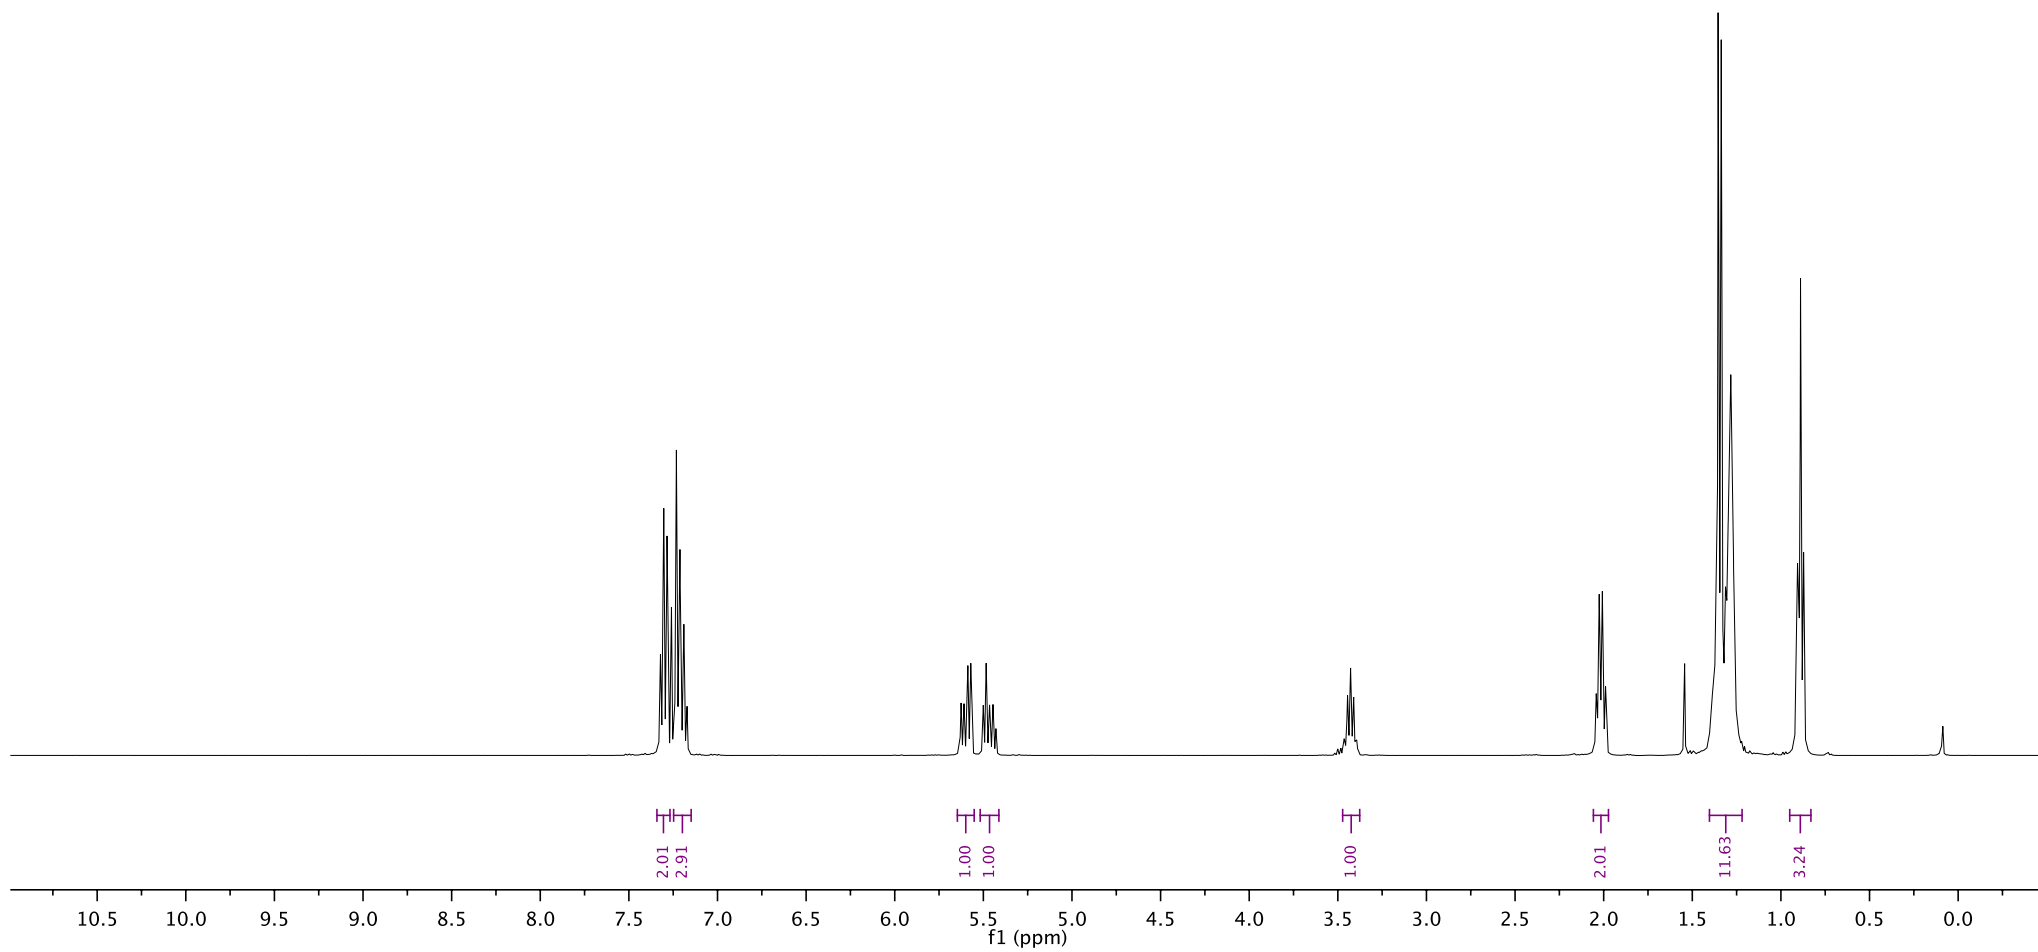

| Parameter              | Value                |
|------------------------|----------------------|
| Title                  | KEP-2-224_pure.2.fid |
| Origin                 | Bruker BioSpin GmbH  |
| Solvent                | CDCl3                |
| Temperature            | 295.0                |
| Pulse Sequence         | zgpg30               |
| Number of Scans        | 128                  |
| Receiver Gain          | 98.9                 |
| Relaxation Delay       | 2.0000               |
| Pulse Width            | 10.0000              |
| Acquisition Time       | 1.3631               |
| Acquisition Date       | 2016-08-19T05:14:59  |
| Spectrometer Frequency | 100.62               |
| Spectral Width         | 24038.5              |
| Lowest Frequency       | -1933.2              |
| Nucleus                | 13C                  |
| Acquired Size          | 32768                |
| Spectral Size          | 65536                |

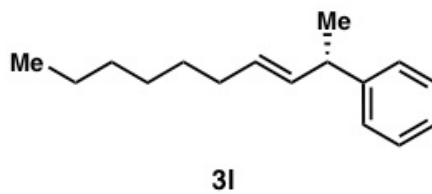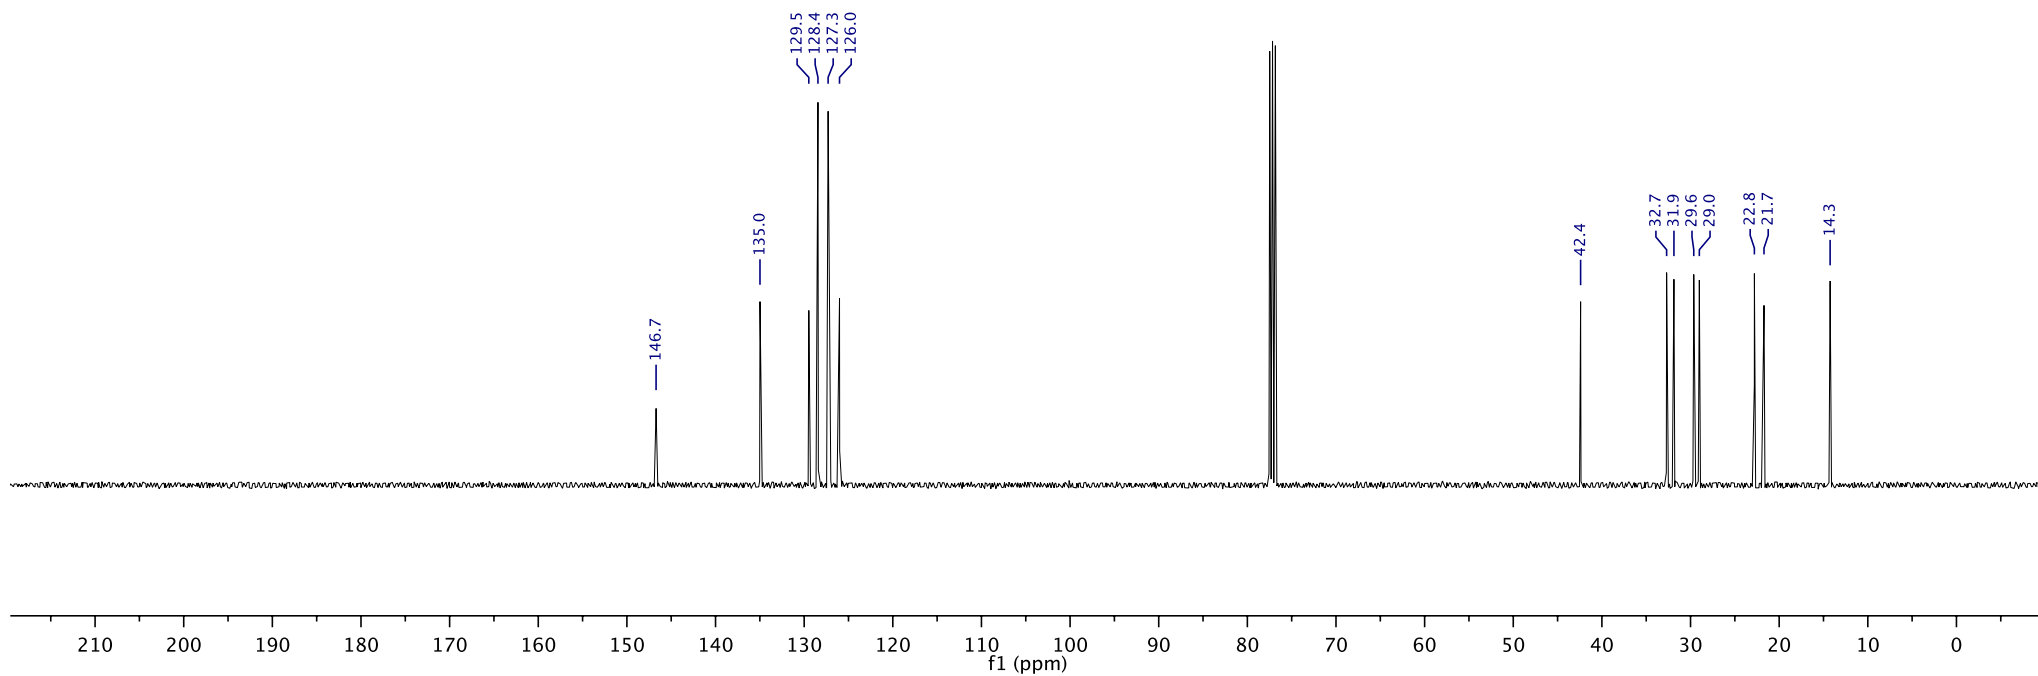

| Parameter              | Value                      |
|------------------------|----------------------------|
| Title                  | JLH-6-042A-column-CH.1.fid |
| Origin                 | Bruker BioSpin GmbH        |
| Solvent                | CDCl3                      |
| Temperature            | 294.9                      |
| Pulse Sequence         | zg30                       |
| Number of Scans        | 16                         |
| Receiver Gain          | 30.3                       |
| Relaxation Delay       | 1.0000                     |
| Pulse Width            | 11.7000                    |
| Acquisition Time       | 4.0894                     |
| Acquisition Date       | 2017-01-07T19:20:30        |
| Spectrometer Frequency | 400.13                     |
| Spectral Width         | 8012.8                     |
| Lowest Frequency       | -1535.6                    |
| Nucleus                | <sup>1</sup> H             |
| Acquired Size          | 32768                      |
| Spectral Size          | 65536                      |

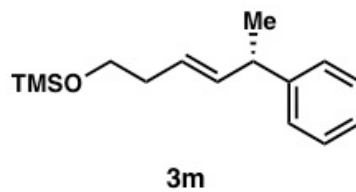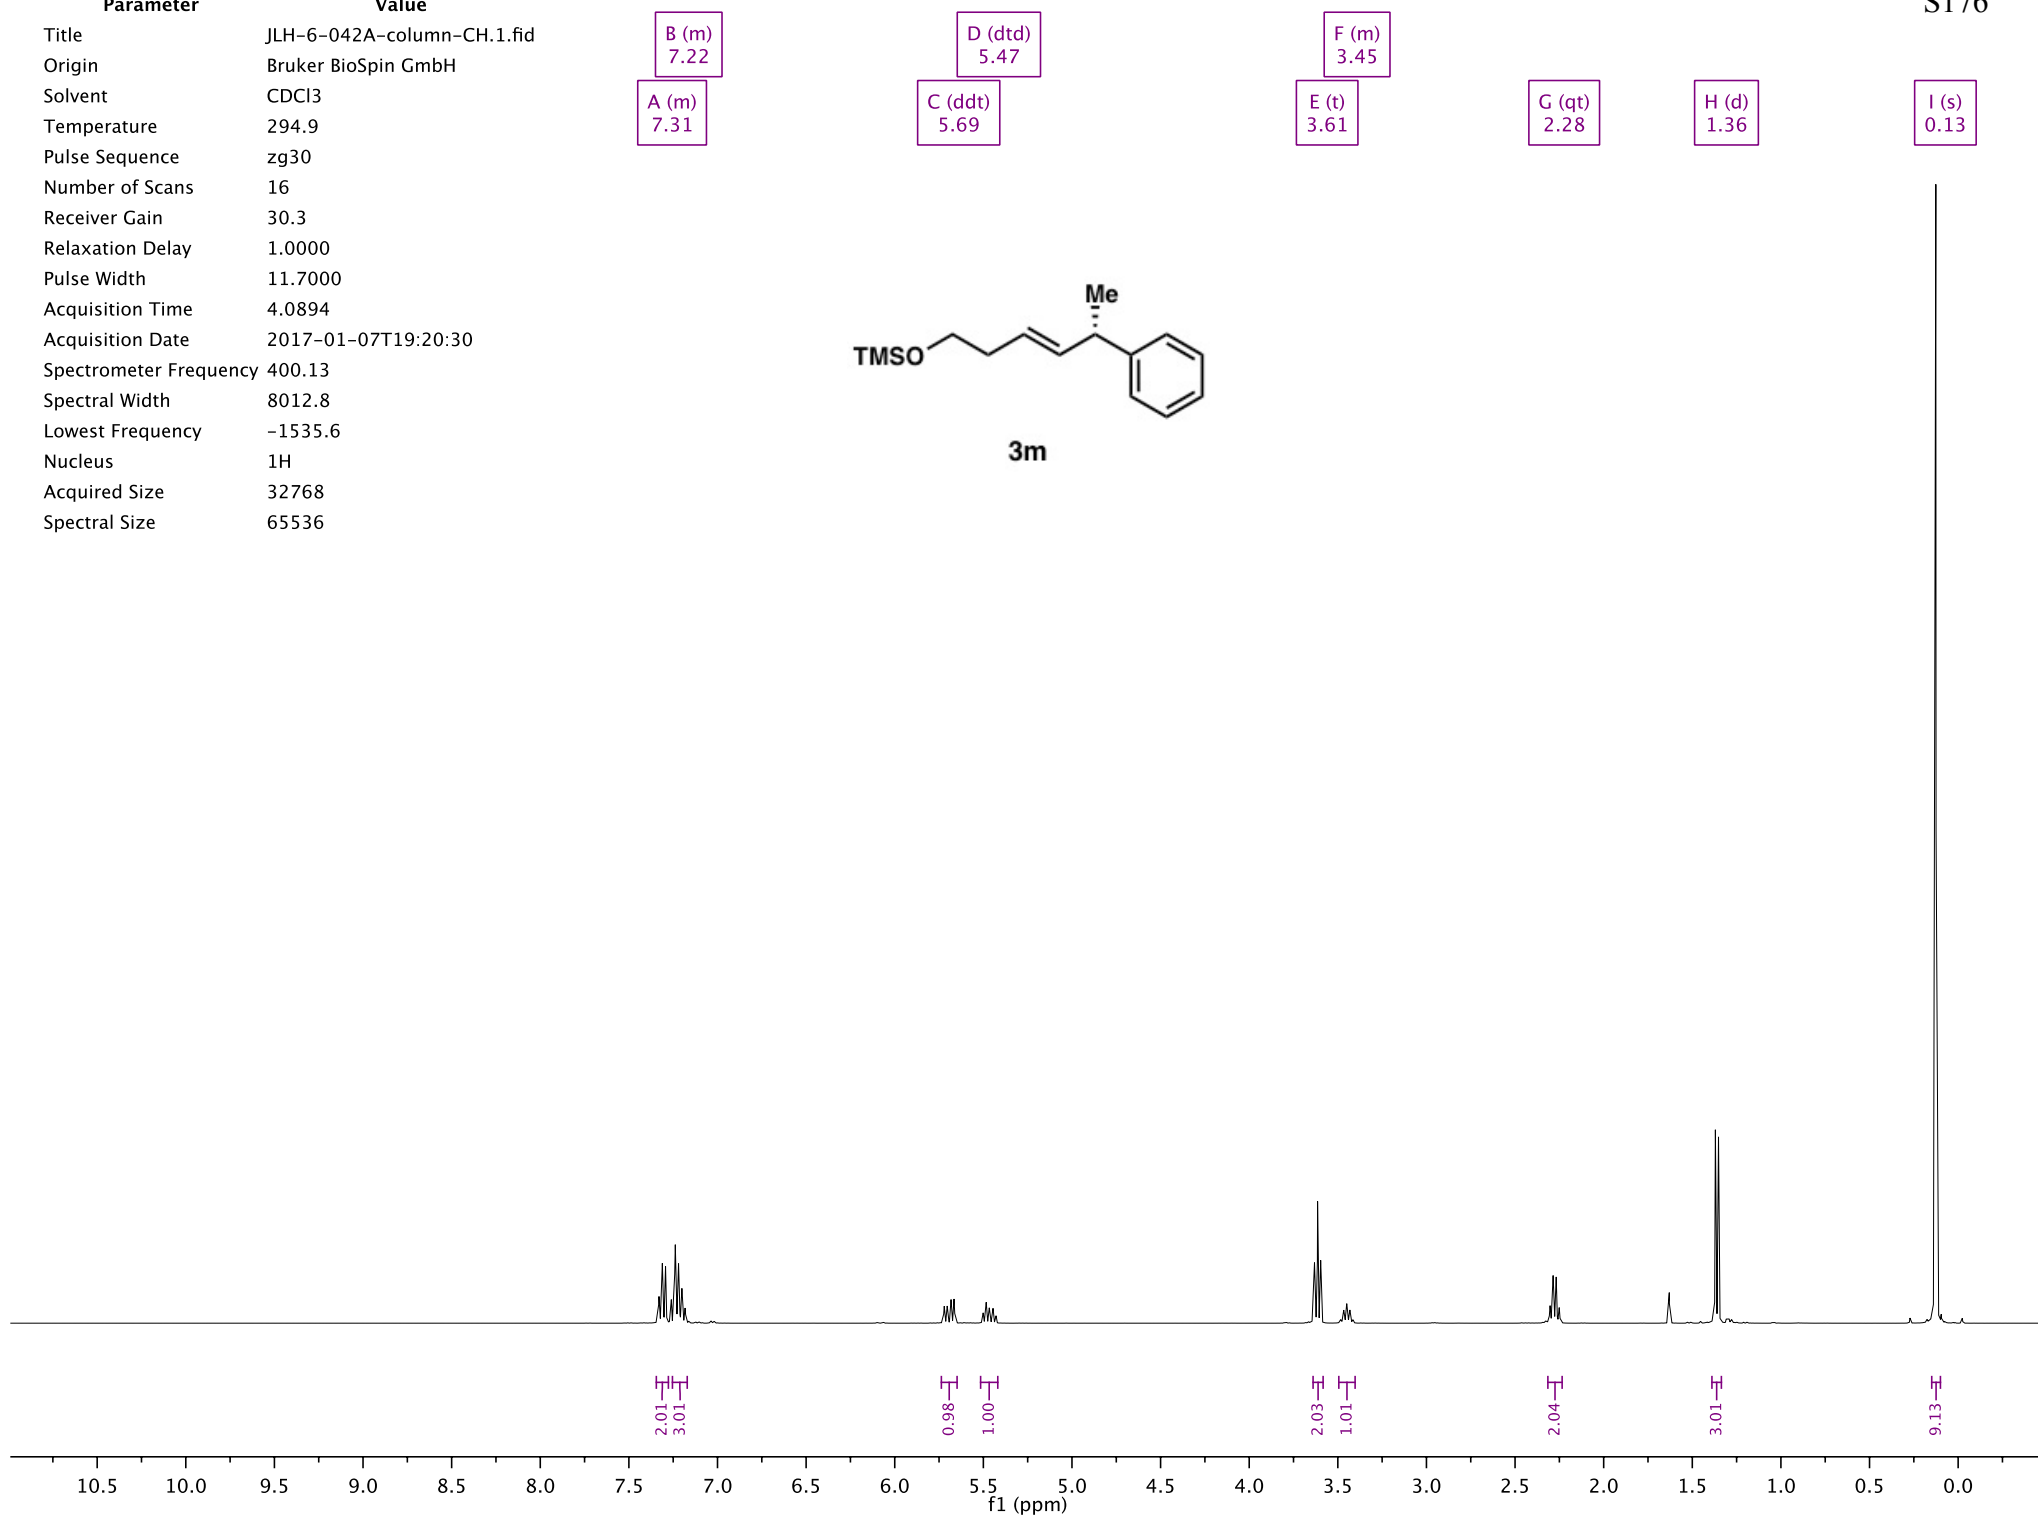

| Parameter              | Value                      |
|------------------------|----------------------------|
| Title                  | JLH-6-042A-column-CH.2.fid |
| Origin                 | Bruker BioSpin GmbH        |
| Solvent                | CDCl3                      |
| Temperature            | 294.9                      |
| Pulse Sequence         | zgpg30                     |
| Number of Scans        | 128                        |
| Receiver Gain          | 64.2                       |
| Relaxation Delay       | 2.0000                     |
| Pulse Width            | 10.0000                    |
| Acquisition Time       | 1.3631                     |
| Acquisition Date       | 2017-01-07T19:28:21        |
| Spectrometer Frequency | 100.62                     |
| Spectral Width         | 24038.5                    |
| Lowest Frequency       | -1918.3                    |
| Nucleus                | <sup>13</sup> C            |
| Acquired Size          | 32768                      |
| Spectral Size          | 65536                      |

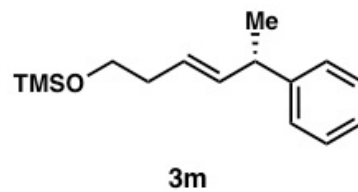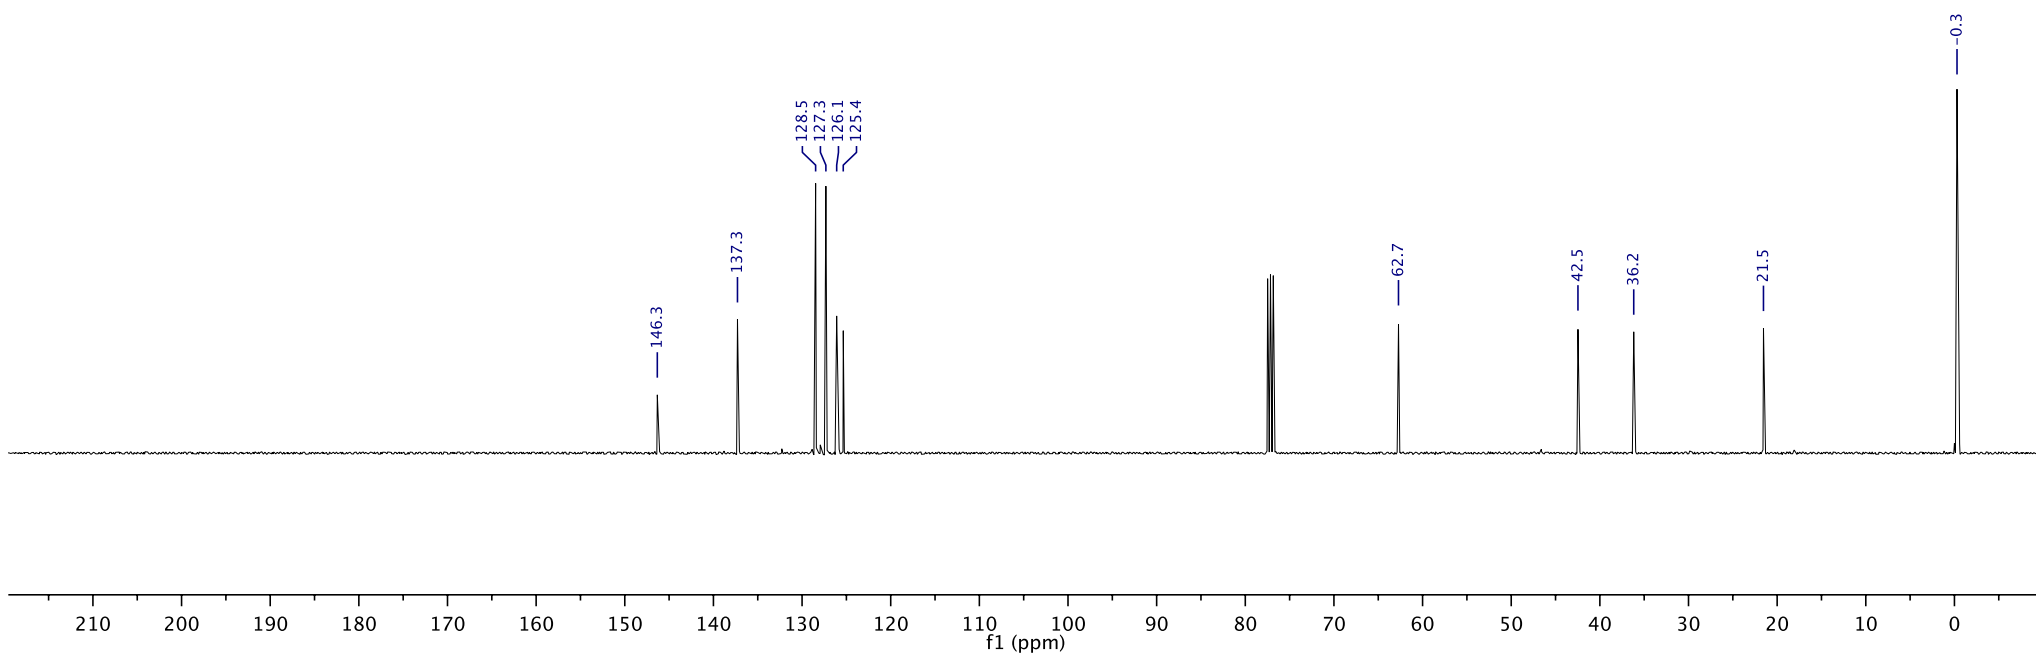

| Parameter              | Value                    |
|------------------------|--------------------------|
| Title                  | JLH-6-043-crude-CH.1.fid |
| Origin                 | Bruker BioSpin GmbH      |
| Solvent                | CDCl3                    |
| Temperature            | 295.0                    |
| Pulse Sequence         | zg30                     |
| Number of Scans        | 16                       |
| Receiver Gain          | 50.3                     |
| Relaxation Delay       | 1.0000                   |
| Pulse Width            | 11.7000                  |
| Acquisition Time       | 4.0894                   |
| Acquisition Date       | 2017-01-08T14:57:21      |
| Spectrometer Frequency | 400.13                   |
| Spectral Width         | 8012.8                   |
| Lowest Frequency       | -1535.6                  |
| Nucleus                | <sup>1</sup> H           |
| Acquired Size          | 32768                    |
| Spectral Size          | 65536                    |

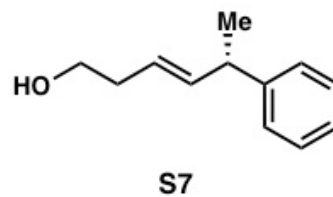

B (m)  
7.22

A (m)  
7.31

D (dtd)  
5.45

C (ddt)  
5.76

F (m)  
3.47

E (t)  
3.65

G (q)  
2.30

I (d)  
1.37

H (s)  
1.54

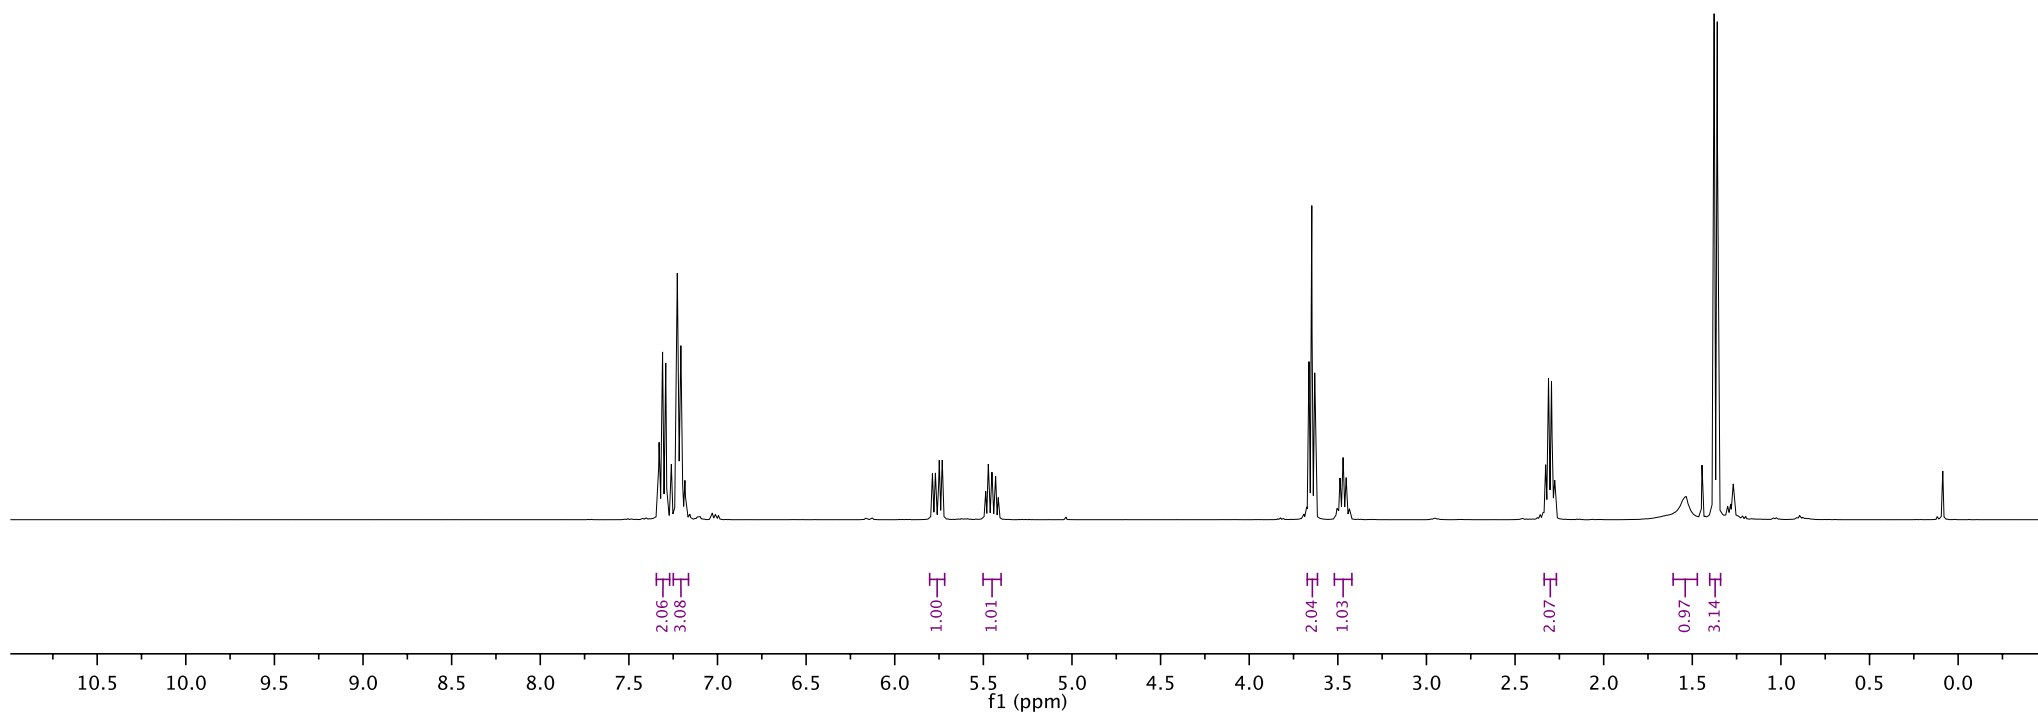

| Parameter              | Value                    |
|------------------------|--------------------------|
| Title                  | JLH-6-043-crude-CH.2.fid |
| Origin                 | Bruker BioSpin GmbH      |
| Solvent                | CDCl3                    |
| Temperature            | 295.0                    |
| Pulse Sequence         | zgpg30                   |
| Number of Scans        | 128                      |
| Receiver Gain          | 64.2                     |
| Relaxation Delay       | 2.0000                   |
| Pulse Width            | 10.0000                  |
| Acquisition Time       | 1.3631                   |
| Acquisition Date       | 2017-01-08T15:05:12      |
| Spectrometer Frequency | 100.62                   |
| Spectral Width         | 24038.5                  |
| Lowest Frequency       | -1958.0                  |
| Nucleus                | <sup>13</sup> C          |
| Acquired Size          | 32768                    |
| Spectral Size          | 65536                    |

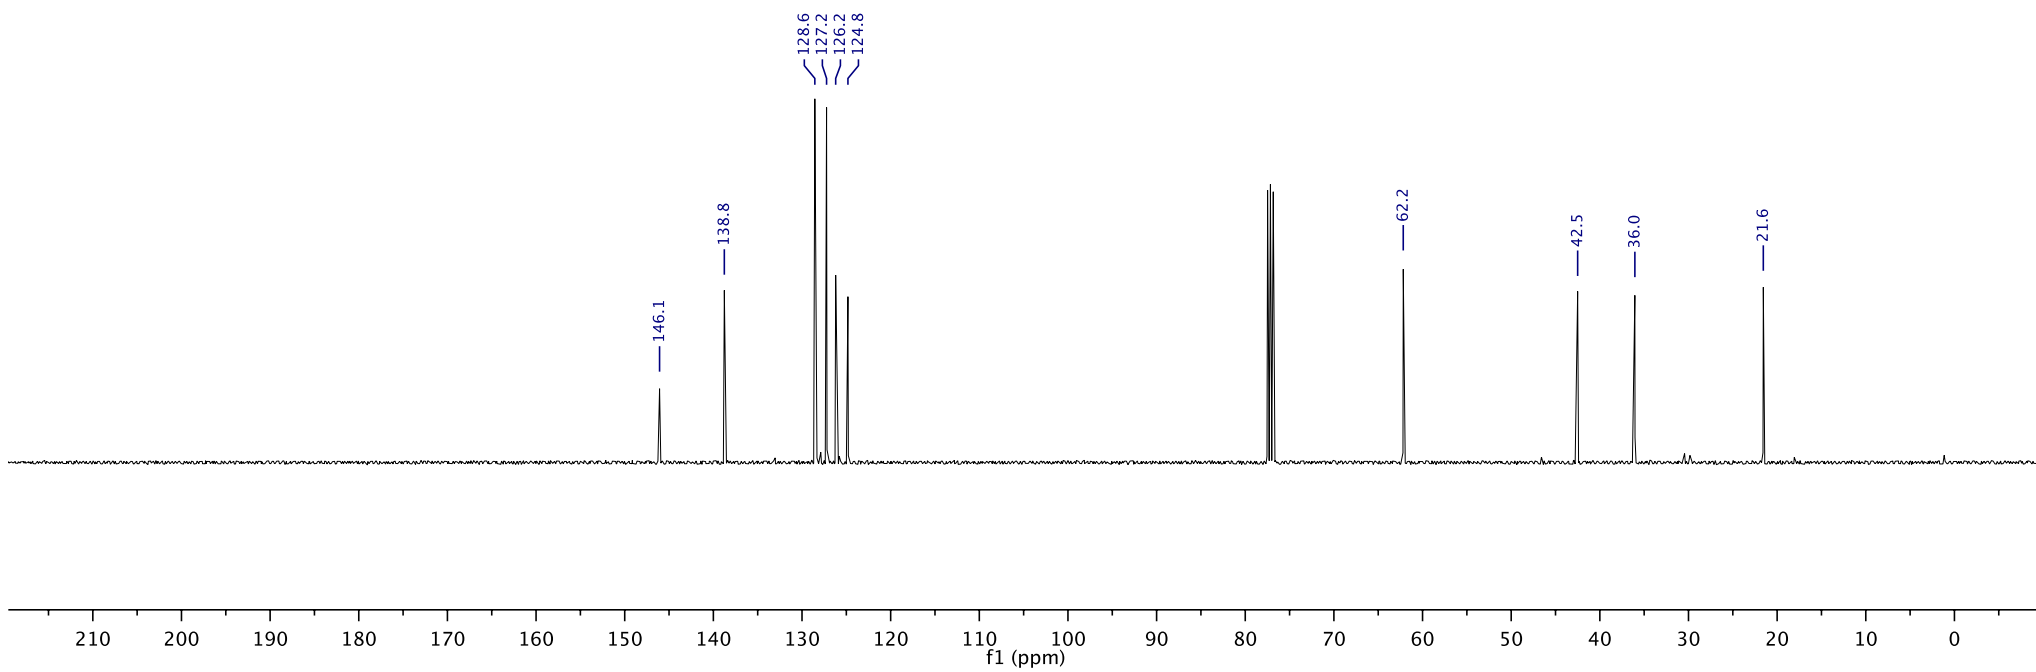

| Parameter              | Value                      |
|------------------------|----------------------------|
| Title                  | JLH-6-030A-column-CH.1.fid |
| Origin                 | Bruker BioSpin GmbH        |
| Solvent                | CDCl3                      |
| Temperature            | 294.9                      |
| Pulse Sequence         | zg30                       |
| Number of Scans        | 16                         |
| Receiver Gain          | 78.7                       |
| Relaxation Delay       | 1.0000                     |
| Pulse Width            | 11.7000                    |
| Acquisition Time       | 4.0894                     |
| Acquisition Date       | 2016-12-23T14:46:52        |
| Spectrometer Frequency | 400.13                     |
| Spectral Width         | 8012.8                     |
| Lowest Frequency       | -1535.6                    |
| Nucleus                | <sup>1</sup> H             |
| Acquired Size          | 32768                      |
| Spectral Size          | 65536                      |

|        |      |
|--------|------|
| B (m)  | 7.16 |
| A (m)  | 7.27 |
| C (dd) | 6.32 |
| D (dd) | 5.38 |
| E (dd) | 3.92 |
| F (dd) | 3.59 |
| G (m)  | 3.50 |
| H (s)  | 2.69 |
| I (d)  | 1.36 |

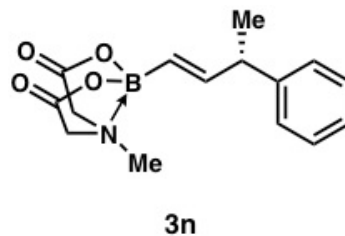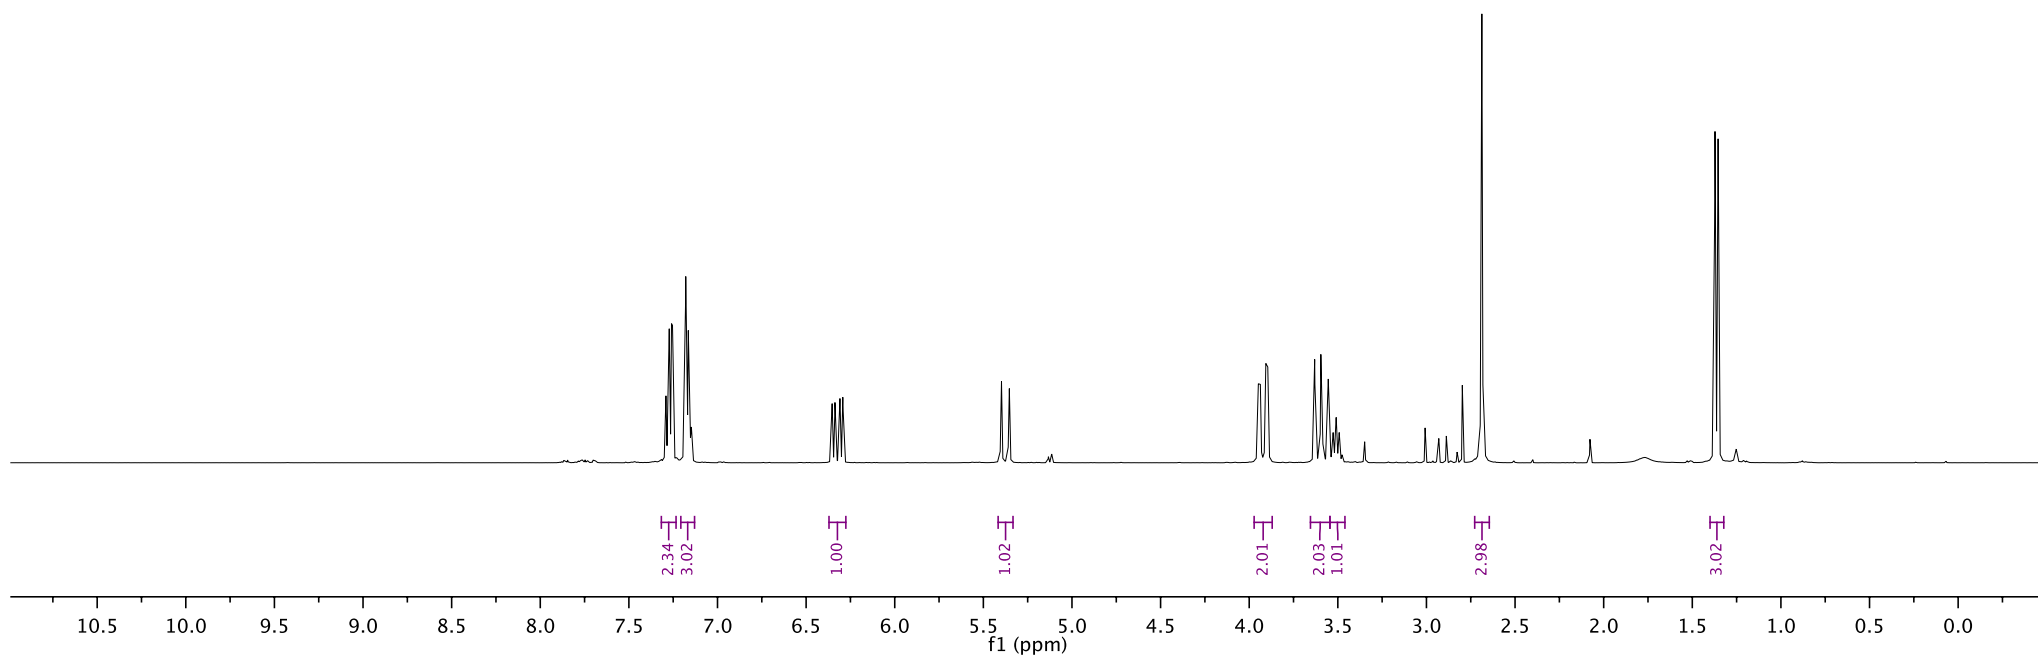



| Parameter              | Value                      |
|------------------------|----------------------------|
| Title                  | JLH-6-030A-column-CH.2.fid |
| Origin                 | Bruker BioSpin GmbH        |
| Solvent                | CDCl3                      |
| Temperature            | 295.0                      |
| Pulse Sequence         | zgpg30                     |
| Number of Scans        | 128                        |
| Receiver Gain          | 64.2                       |
| Relaxation Delay       | 2.0000                     |
| Pulse Width            | 10.0000                    |
| Acquisition Time       | 1.3631                     |
| Acquisition Date       | 2016-12-23T14:54:42        |
| Spectrometer Frequency | 100.62                     |
| Spectral Width         | 24038.5                    |
| Lowest Frequency       | -1958.0                    |
| Nucleus                | <sup>13</sup> C            |
| Acquired Size          | 32768                      |
| Spectral Size          | 65536                      |

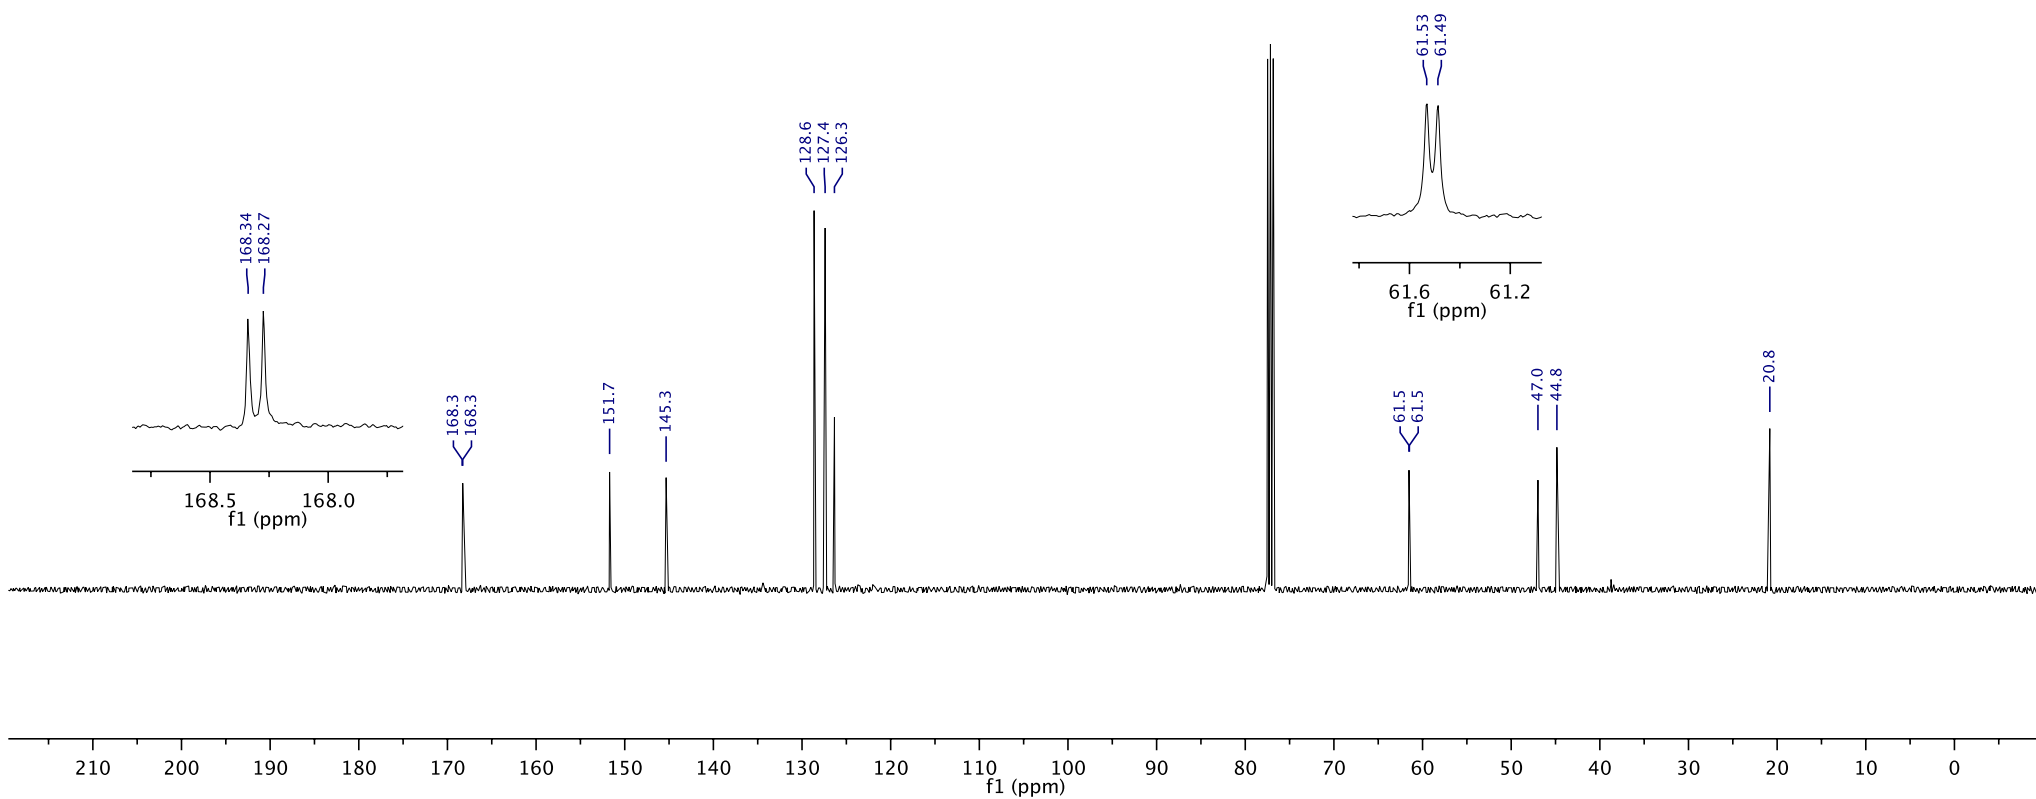

| Parameter              | Value               |
|------------------------|---------------------|
| Title                  | KEP-2-219_TMS.1.fid |
| Origin                 | Bruker BioSpin GmbH |
| Solvent                | CDCl3               |
| Temperature            | 294.9               |
| Pulse Sequence         | zg30                |
| Number of Scans        | 16                  |
| Receiver Gain          | 72.0                |
| Relaxation Delay       | 1.0000              |
| Pulse Width            | 11.7000             |
| Acquisition Time       | 4.0894              |
| Acquisition Date       | 2016-07-22T06:34:10 |
| Spectrometer Frequency | 400.13              |
| Spectral Width         | 8012.8              |
| Lowest Frequency       | -1555.6             |
| Nucleus                | <sup>1</sup> H      |
| Acquired Size          | 32768               |
| Spectral Size          | 65536               |

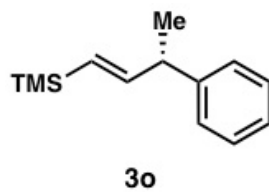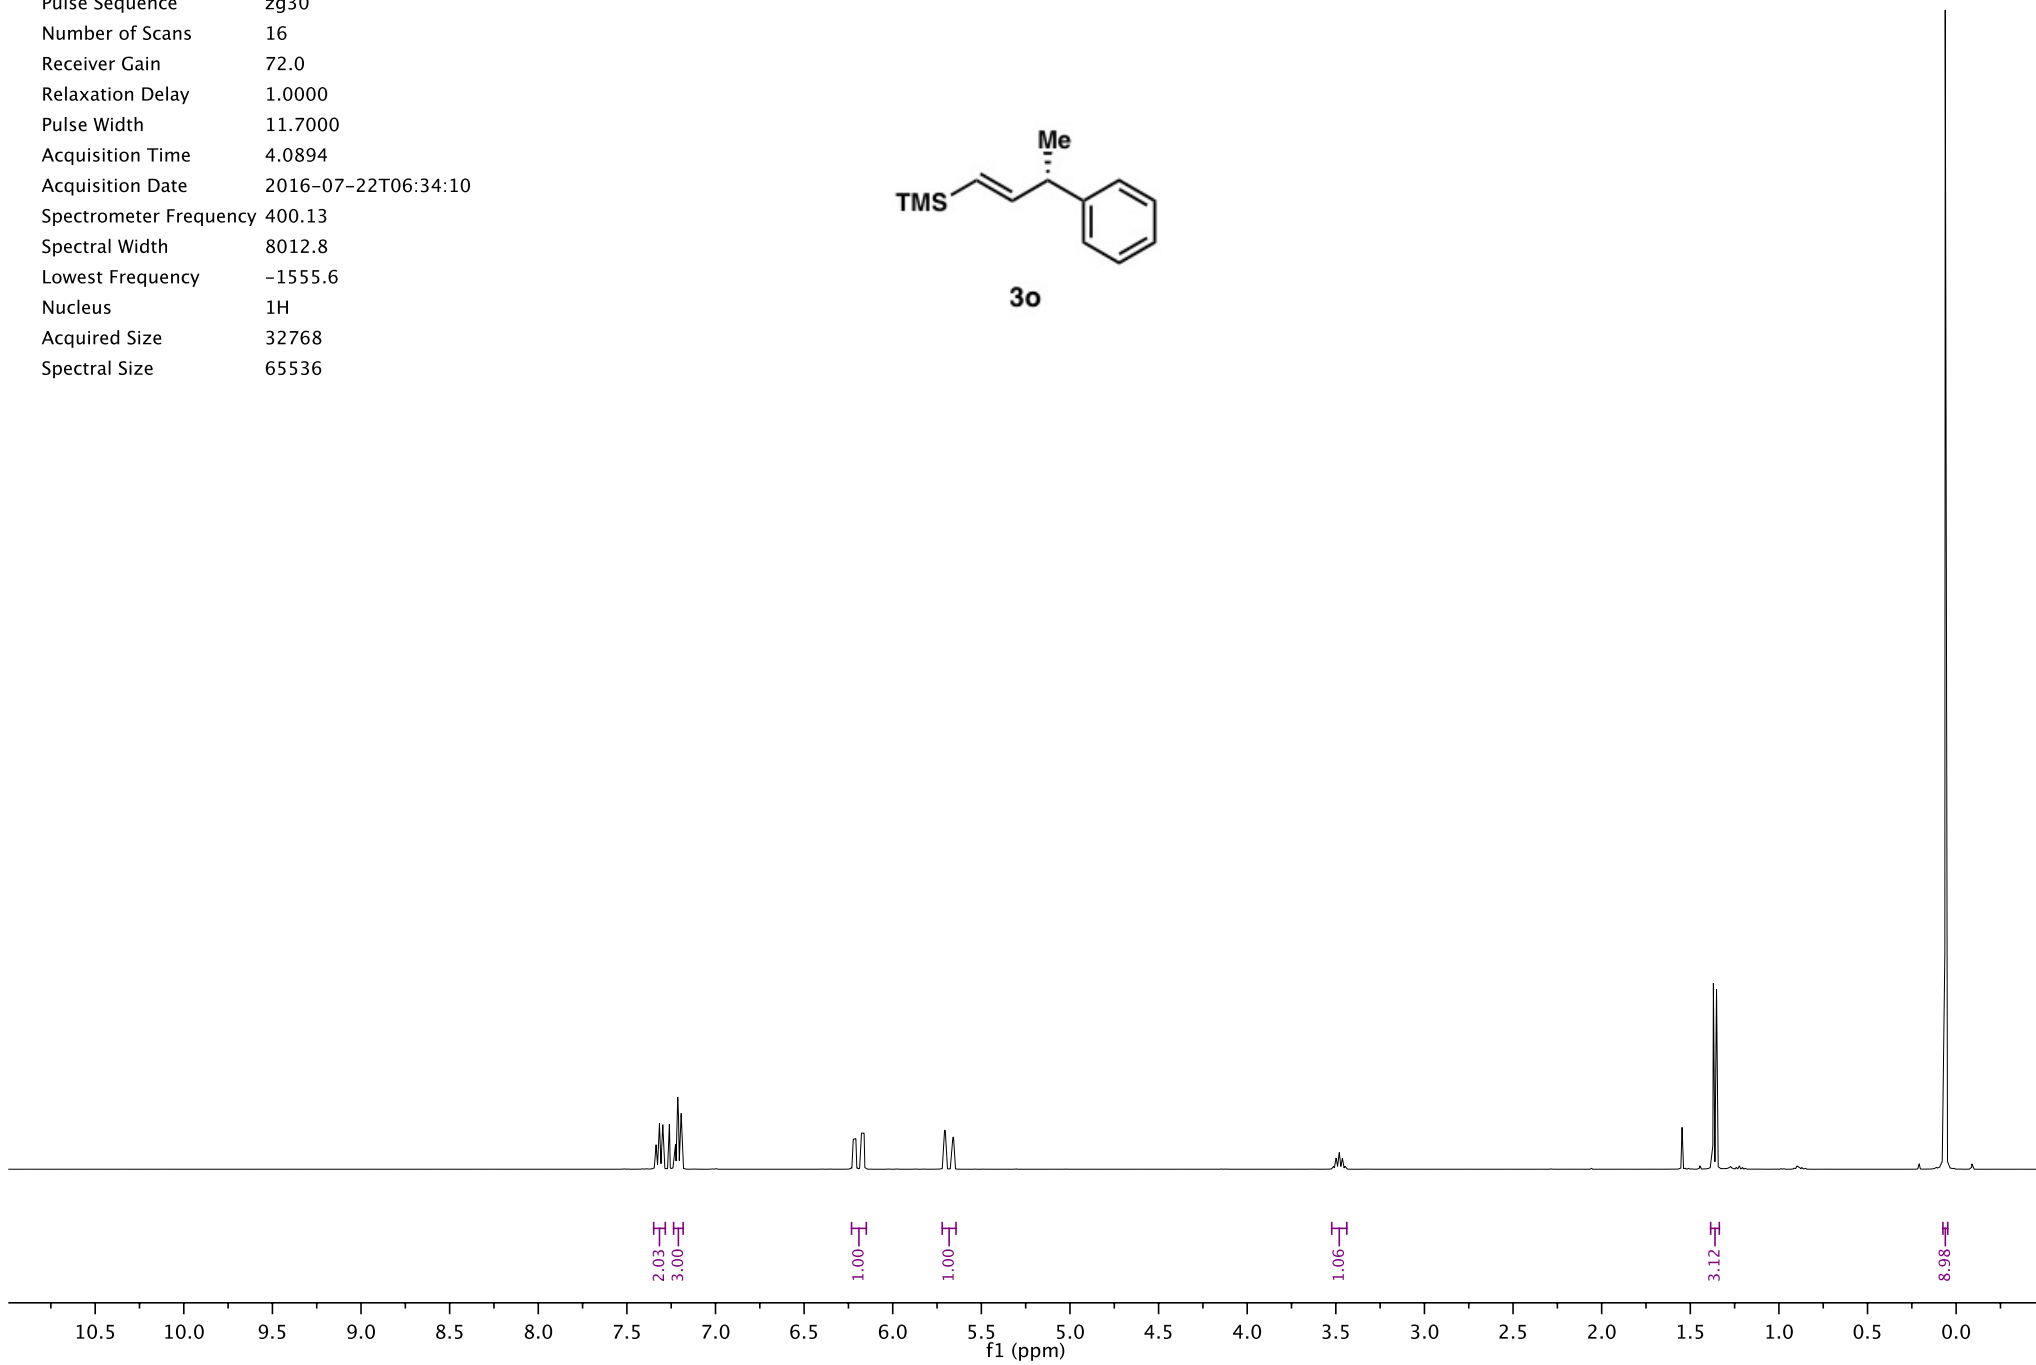

| Parameter              | Value               |
|------------------------|---------------------|
| Title                  | KEP-2-219_TMS.2.fid |
| Origin                 | Bruker BioSpin GmbH |
| Solvent                | CDCl3               |
| Temperature            | 295.0               |
| Pulse Sequence         | zgpg30              |
| Number of Scans        | 128                 |
| Receiver Gain          | 72.0                |
| Relaxation Delay       | 2.0000              |
| Pulse Width            | 10.0000             |
| Acquisition Time       | 1.3631              |
| Acquisition Date       | 2016-07-22T06:42:00 |
| Spectrometer Frequency | 100.62              |
| Spectral Width         | 24038.5             |
| Lowest Frequency       | -2045.2             |
| Nucleus                | <sup>13</sup> C     |
| Acquired Size          | 32768               |
| Spectral Size          | 65536               |

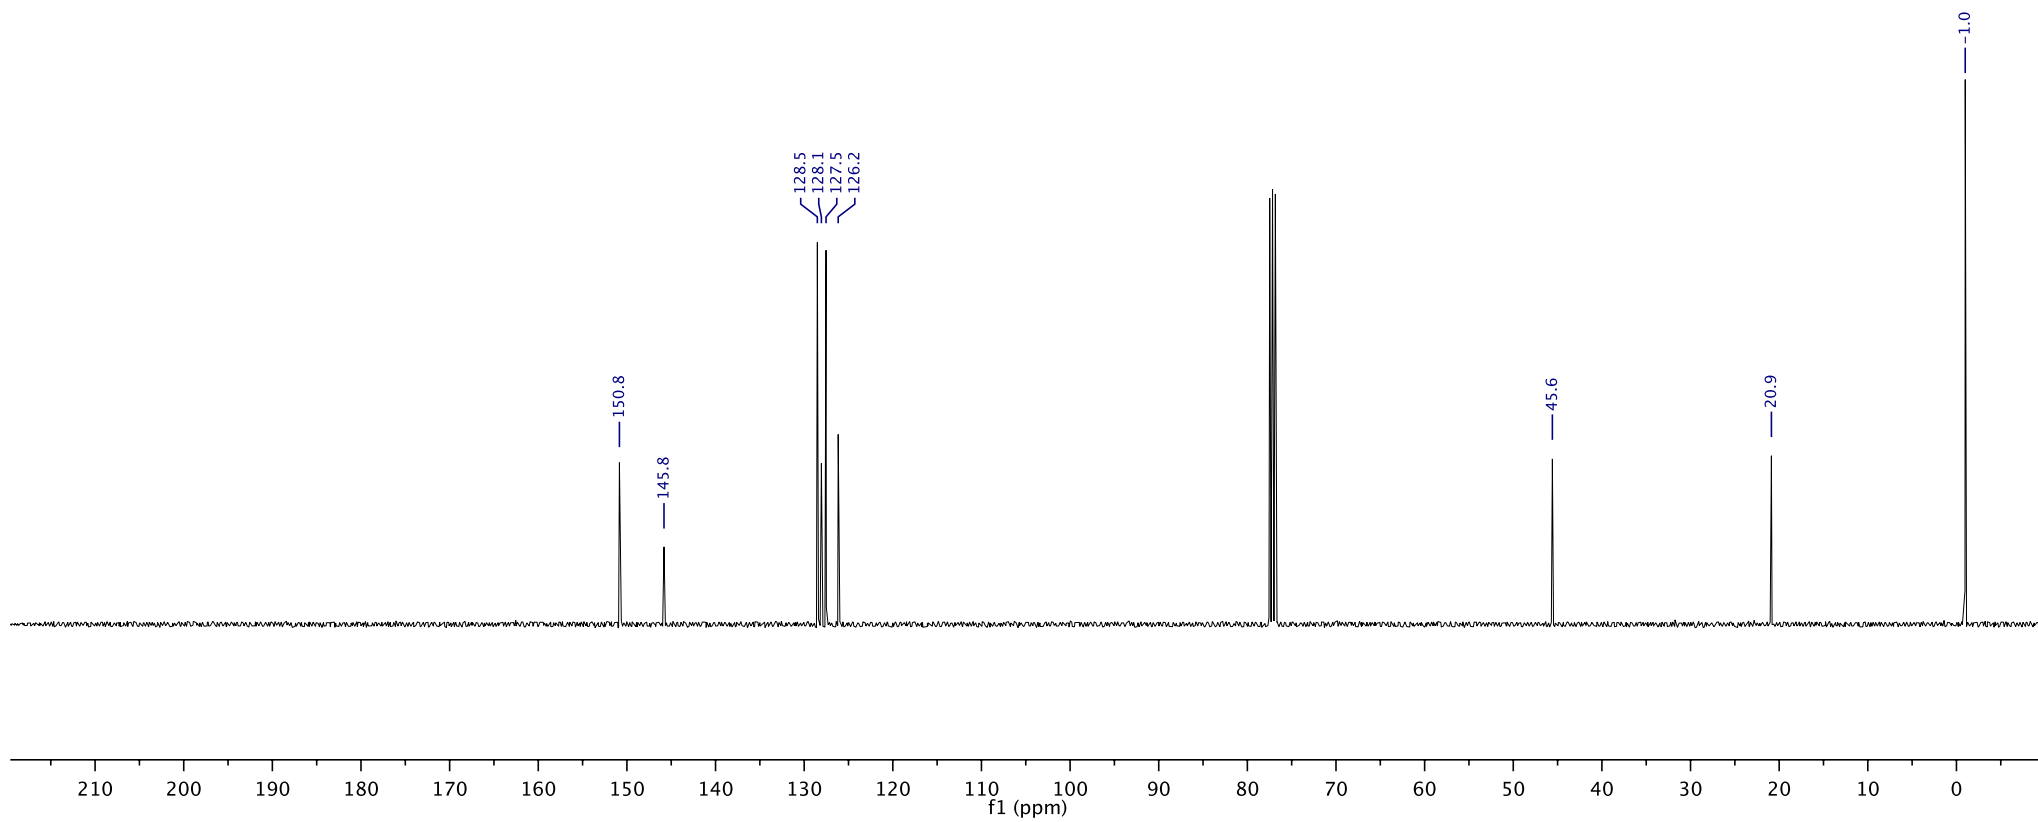

| Parameter              | Value               |
|------------------------|---------------------|
| Title                  | NAO-01-190-A.1.fid  |
| Origin                 | Bruker BioSpin GmbH |
| Solvent                | CDCl3               |
| Temperature            | 294.9               |
| Pulse Sequence         | zg30                |
| Number of Scans        | 16                  |
| Receiver Gain          | 30.3                |
| Relaxation Delay       | 1.0000              |
| Pulse Width            | 11.7000             |
| Acquisition Time       | 4.0894              |
| Acquisition Date       | 2016-08-20T01:10:21 |
| Spectrometer Frequency | 400.13              |
| Spectral Width         | 8012.8              |
| Lowest Frequency       | -1555.6             |
| Nucleus                | 1H                  |
| Acquired Size          | 32768               |
| Spectral Size          | 65536               |

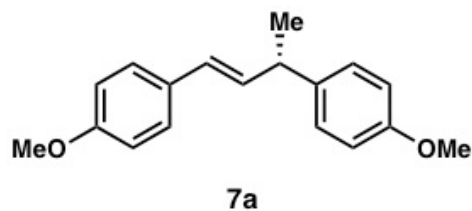

|       |       |        |       |
|-------|-------|--------|-------|
| B (d) | D (d) | E (d)  | G (s) |
| 7.22  | 6.86  | 6.37   | 3.82  |
| A (d) | C (d) | F (dd) | I (m) |
| 7.32  | 6.89  | 6.25   | 3.62  |
|       |       |        | H (s) |
|       |       |        | 3.81  |
|       |       |        | J (d) |
|       |       |        | 1.46  |

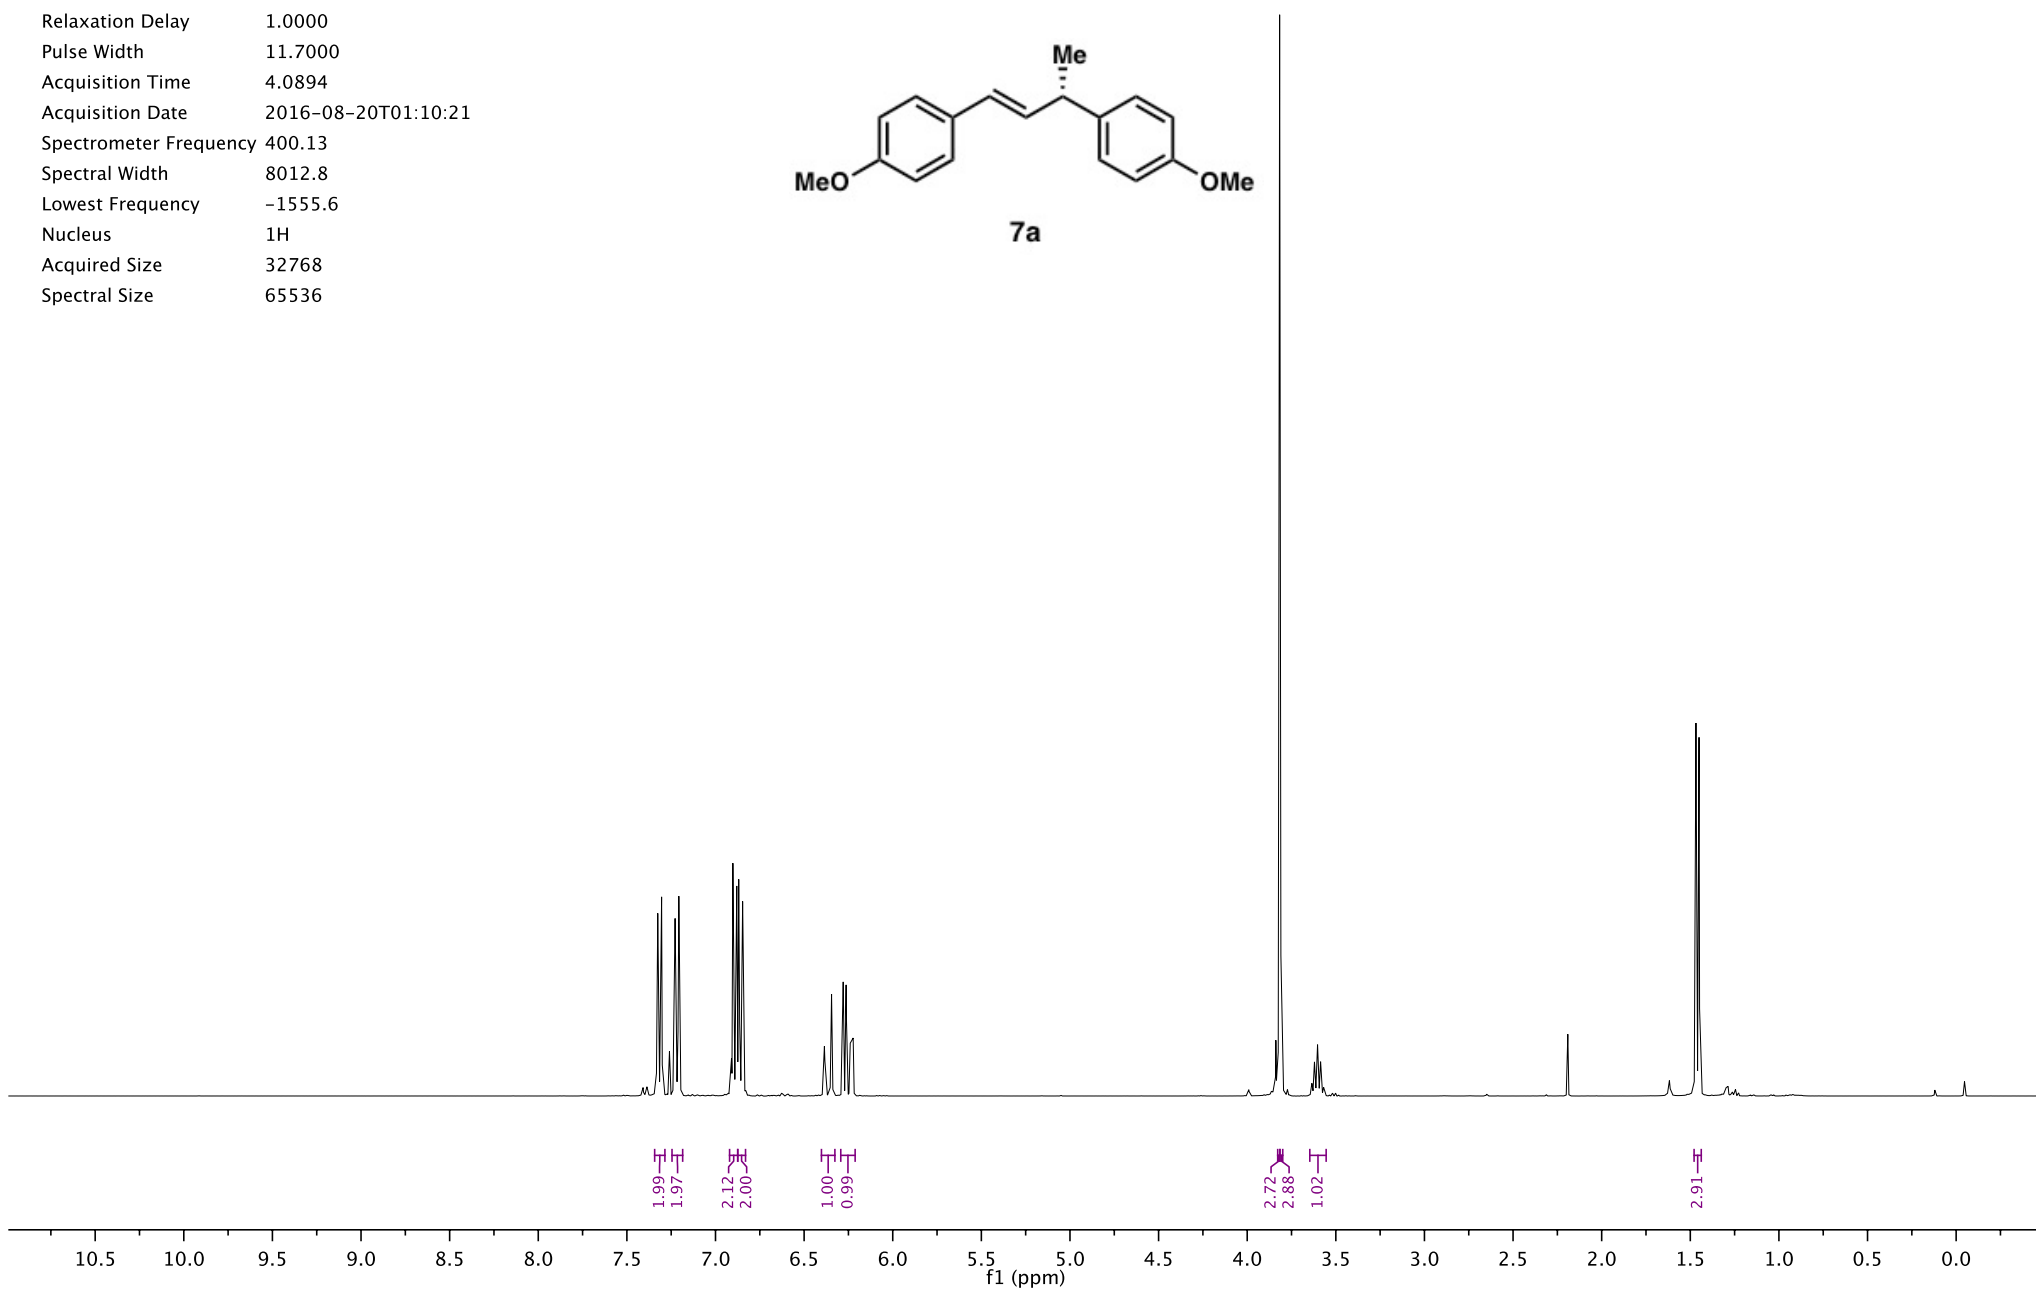

| Parameter              | Value               |
|------------------------|---------------------|
| Title                  | NAO-01-190-A.2.fid  |
| Origin                 | Bruker BioSpin GmbH |
| Solvent                | CDCl3               |
| Temperature            | 294.9               |
| Pulse Sequence         | zgpg30              |
| Number of Scans        | 128                 |
| Receiver Gain          | 64.2                |
| Relaxation Delay       | 2.0000              |
| Pulse Width            | 10.0000             |
| Acquisition Time       | 1.3631              |
| Acquisition Date       | 2016-08-20T01:18:18 |
| Spectrometer Frequency | 100.62              |
| Spectral Width         | 24038.5             |
| Lowest Frequency       | -1958.4             |
| Nucleus                | 13C                 |
| Acquired Size          | 32768               |
| Spectral Size          | 65536               |

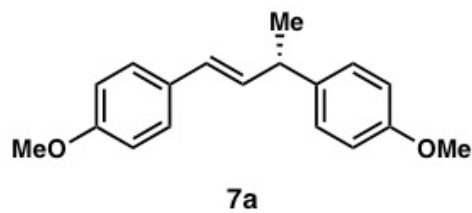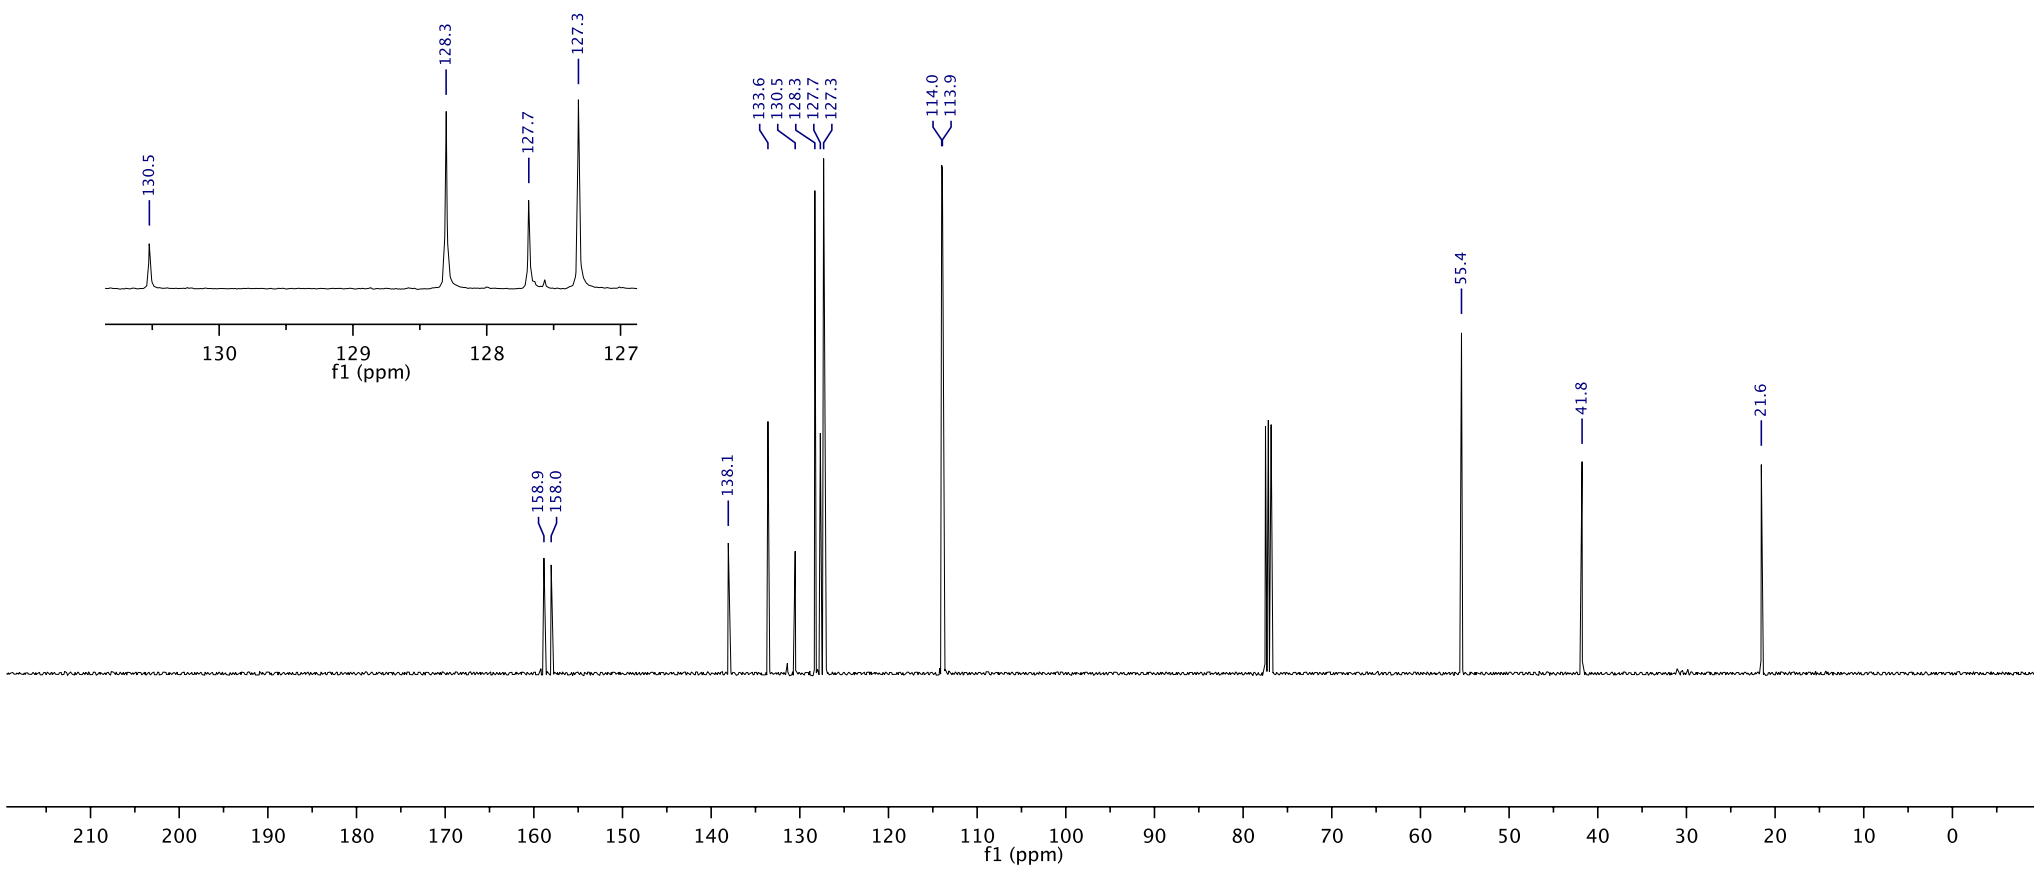

| Parameter              | Value               |
|------------------------|---------------------|
| Title                  | NAO-01-189-A.1.fid  |
| Origin                 | Bruker BioSpin GmbH |
| Solvent                | CDCl3               |
| Temperature            | 295.0               |
| Pulse Sequence         | zg30                |
| Number of Scans        | 16                  |
| Receiver Gain          | 64.2                |
| Relaxation Delay       | 1.0000              |
| Pulse Width            | 11.7000             |
| Acquisition Time       | 4.0894              |
| Acquisition Date       | 2016-08-20T00:11:45 |
| Spectrometer Frequency | 400.13              |
| Spectral Width         | 8012.8              |
| Lowest Frequency       | -1555.6             |
| Nucleus                | <sup>1</sup> H      |
| Acquired Size          | 32768               |
| Spectral Size          | 65536               |

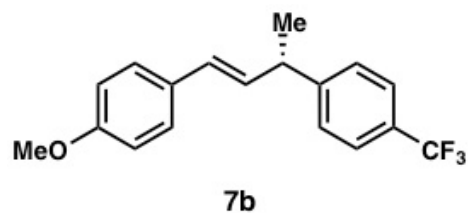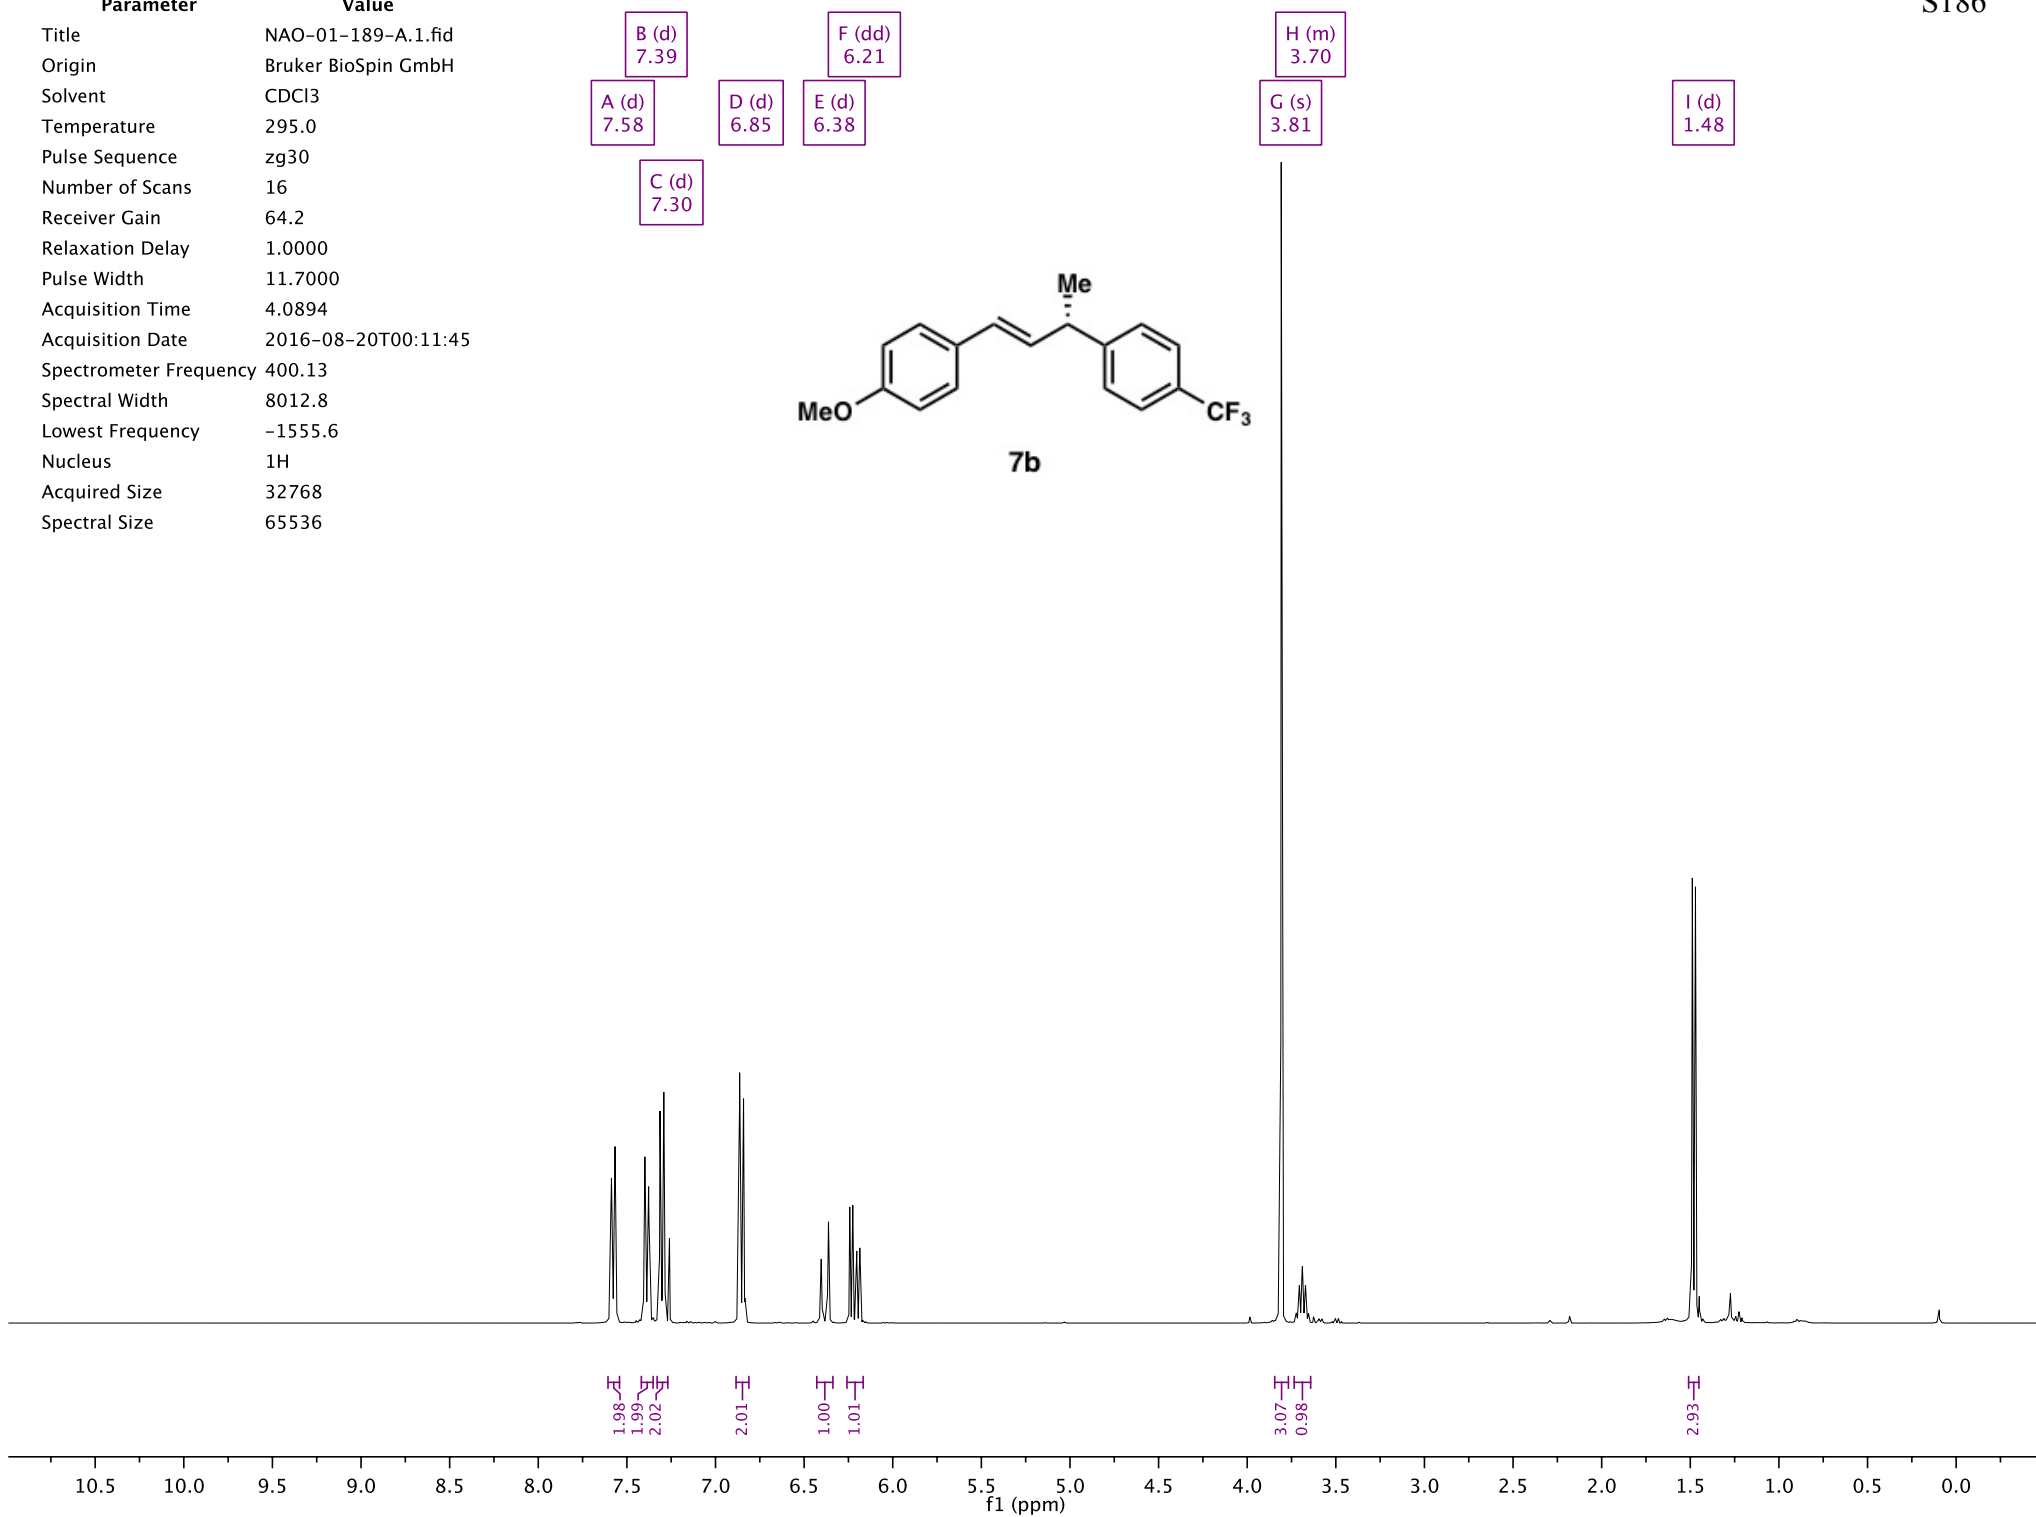

| Parameter              | Value               |
|------------------------|---------------------|
| Title                  | NAO-01-189-A.2.fid  |
| Origin                 | Bruker BioSpin GmbH |
| Solvent                | CDCl3               |
| Temperature            | 294.9               |
| Pulse Sequence         | zgpg30              |
| Number of Scans        | 128                 |
| Receiver Gain          | 64.2                |
| Relaxation Delay       | 2.0000              |
| Pulse Width            | 10.0000             |
| Acquisition Time       | 1.3631              |
| Acquisition Date       | 2016-08-20T00:19:42 |
| Spectrometer Frequency | 100.62              |
| Spectral Width         | 24038.5             |
| Lowest Frequency       | -1935.5             |
| Nucleus                | 13C                 |
| Acquired Size          | 32768               |
| Spectral Size          | 65536               |

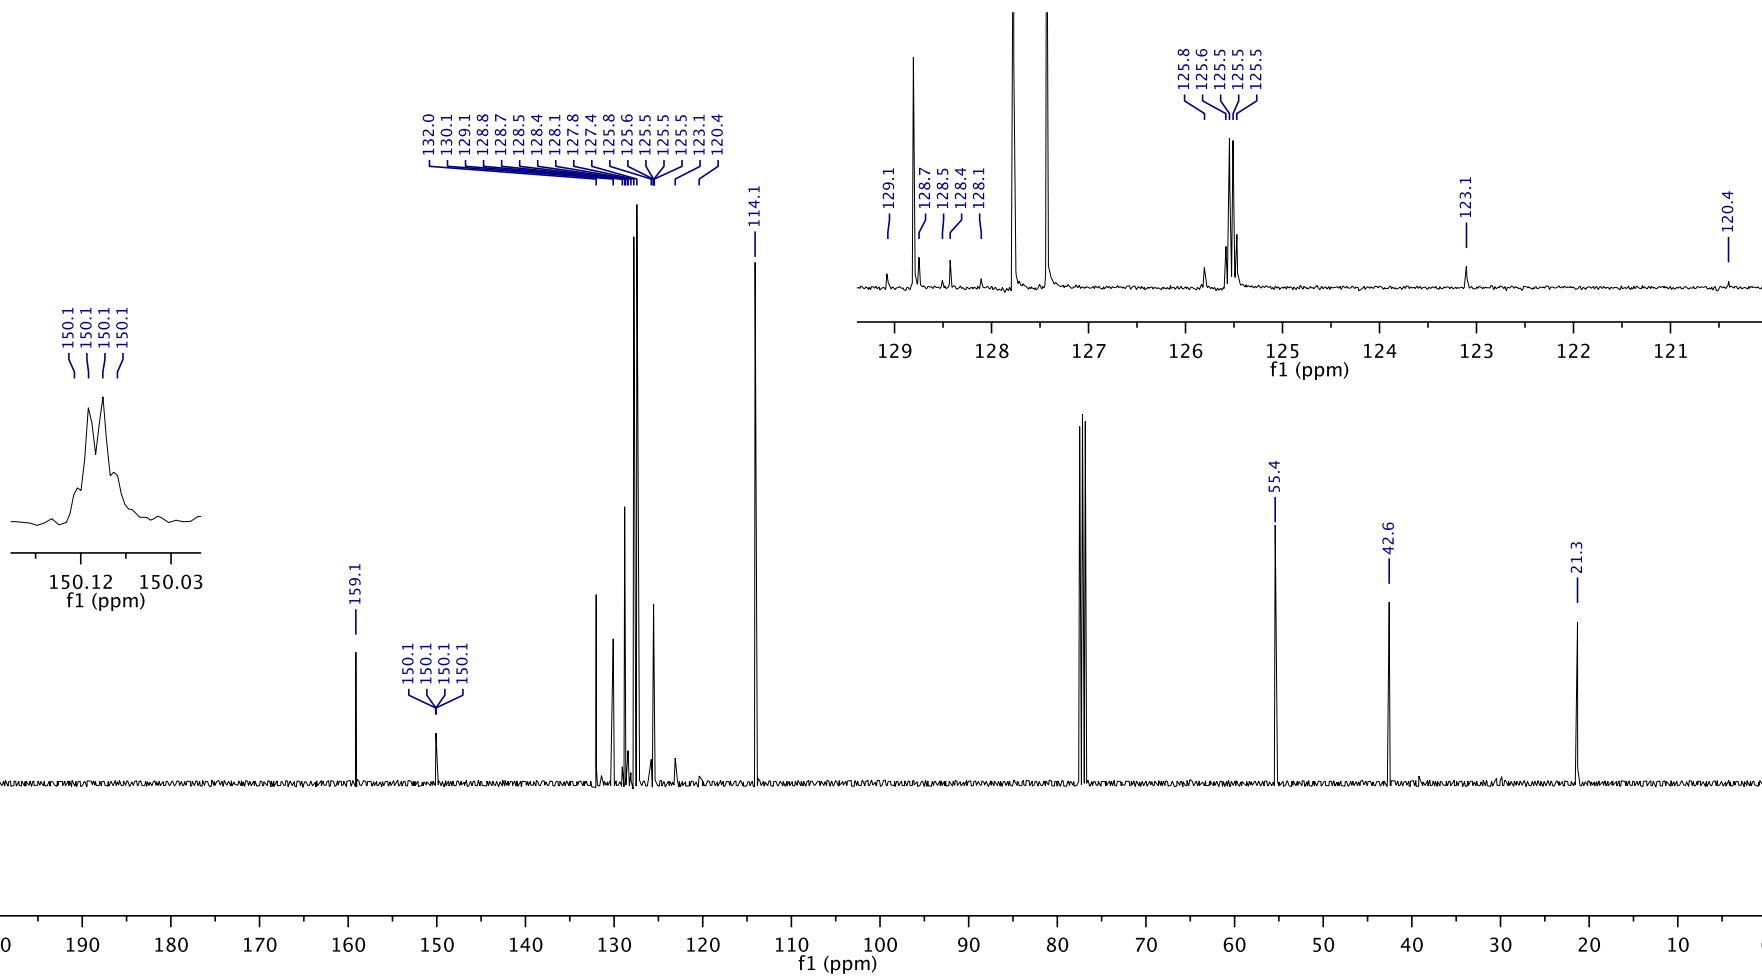

| Parameter              | Value               |
|------------------------|---------------------|
| Title                  | NAO-01-189A         |
| Origin                 | Varian              |
| Solvent                | "cdcl3"             |
| Temperature            | 25.0                |
| Pulse Sequence         | s2pul               |
| Number of Scans        | 16                  |
| Receiver Gain          | 30                  |
| Relaxation Delay       | 1.0000              |
| Pulse Width            | 6.3333              |
| Acquisition Time       | 0.9856              |
| Acquisition Date       | 2016-08-31T23:27:51 |
| Spectrometer Frequency | 282.34              |
| Spectral Width         | 64935.1             |
| Lowest Frequency       | -57338.6            |
| Nucleus                | 19F                 |
| Acquired Size          | 64000               |
| Spectral Size          | 131072              |

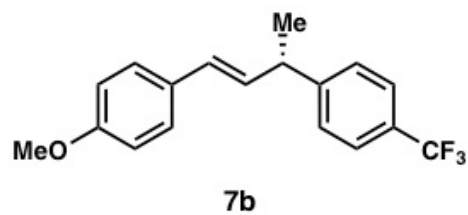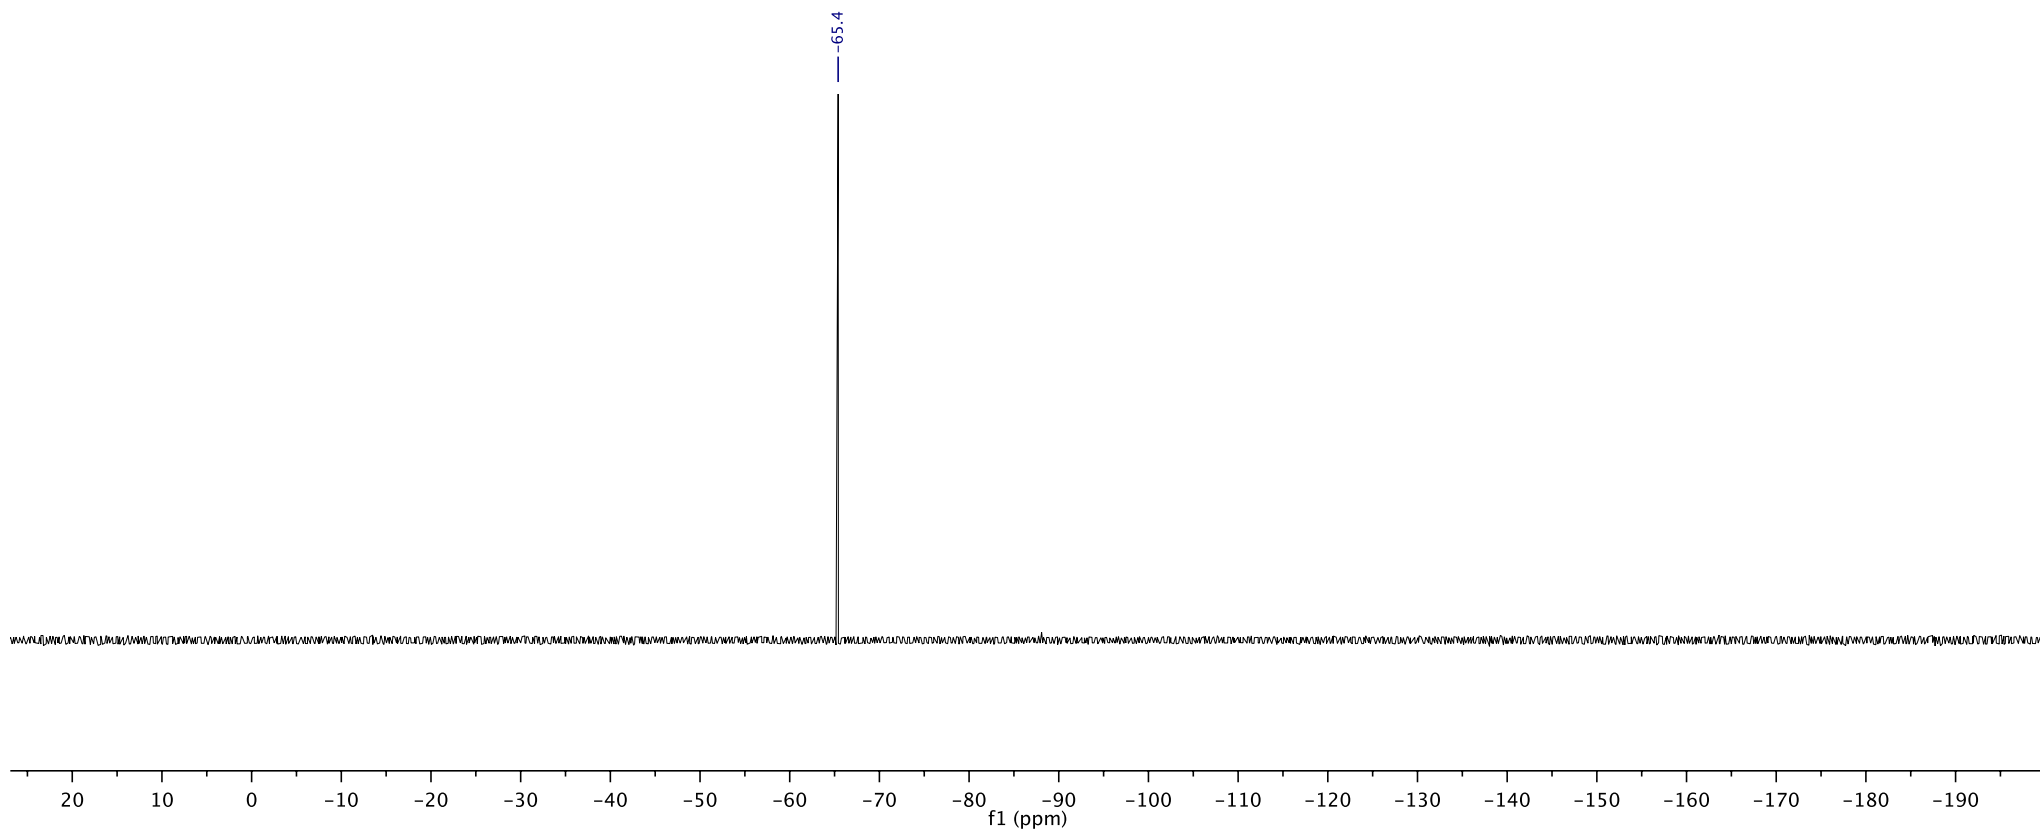



| Parameter              | Value               |
|------------------------|---------------------|
| Title                  | NAO-01-189A-C6F6    |
| Origin                 | Varian              |
| Solvent                | "cdcl3"             |
| Temperature            | 25.0                |
| Pulse Sequence         | s2pul               |
| Number of Scans        | 16                  |
| Receiver Gain          | 30                  |
| Relaxation Delay       | 1.0000              |
| Pulse Width            | 6.3333              |
| Acquisition Time       | 0.9856              |
| Acquisition Date       | 2016-08-31T23:32:04 |
| Spectrometer Frequency | 282.34              |
| Spectral Width         | 64935.1             |
| Lowest Frequency       | -58230.0            |
| Nucleus                | 19F                 |
| Acquired Size          | 64000               |
| Spectral Size          | 131072              |

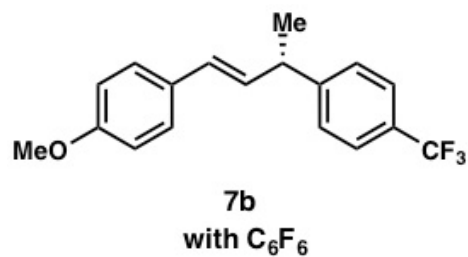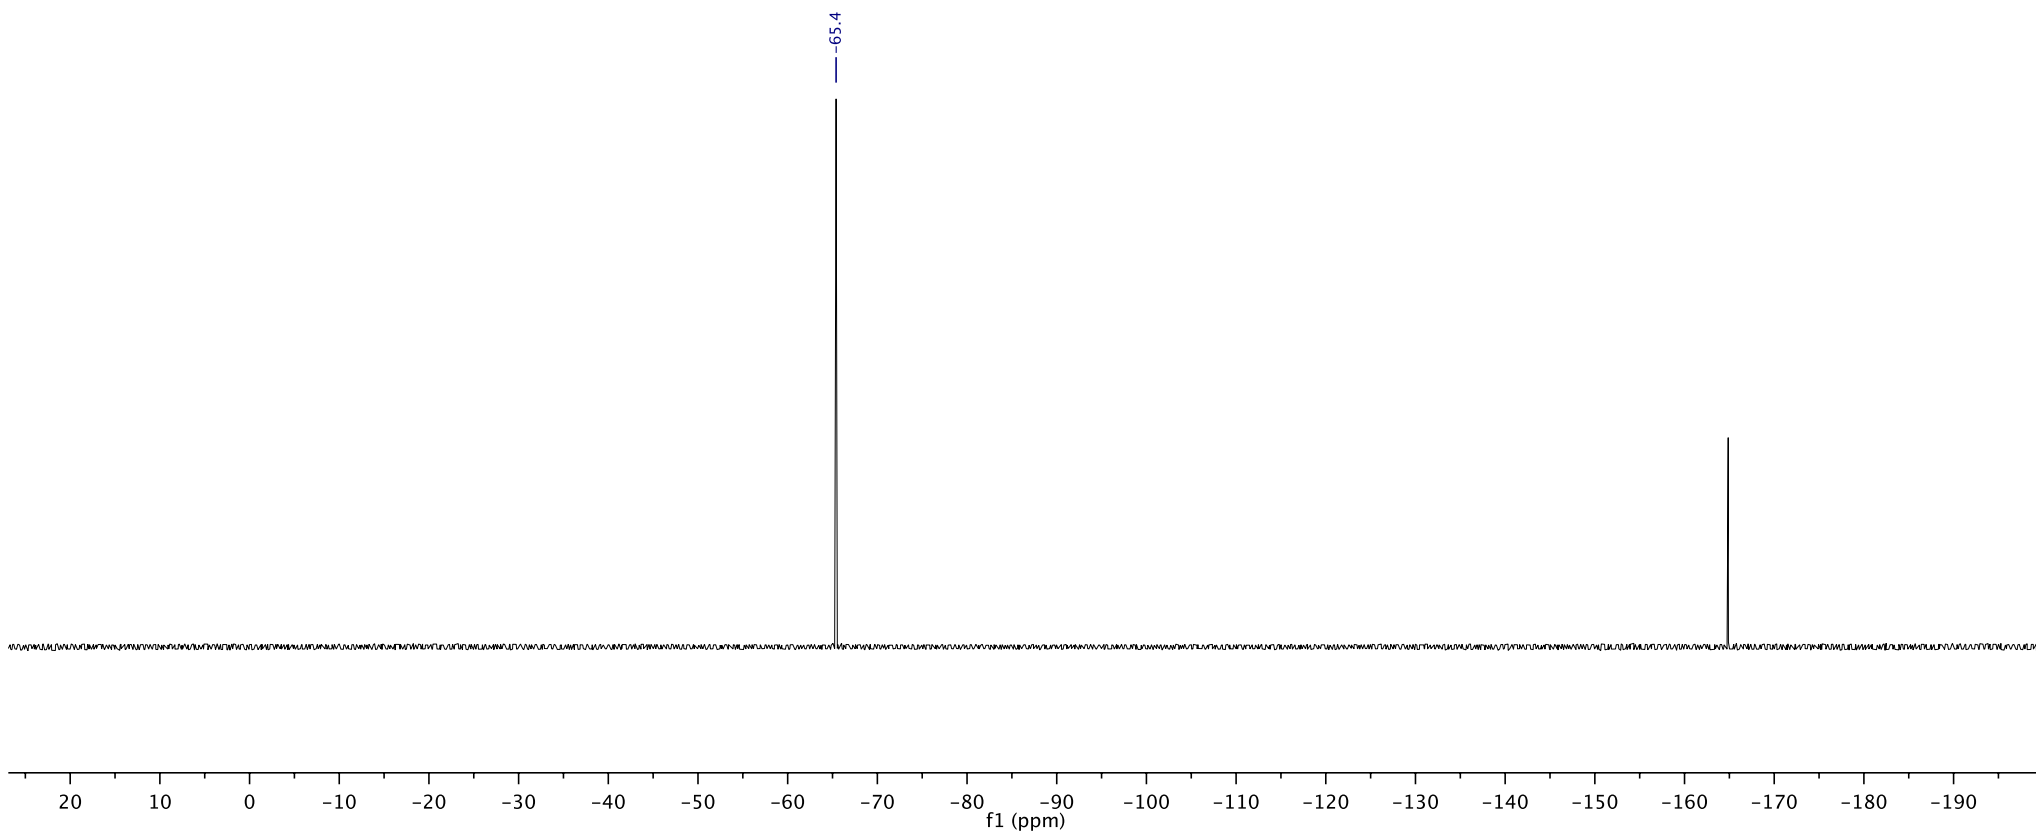

| Parameter              | Value               |
|------------------------|---------------------|
| Title                  | NAO-01-202-A.1.fid  |
| Origin                 | Bruker BioSpin GmbH |
| Solvent                | CDCl3               |
| Temperature            | 294.9               |
| Pulse Sequence         | zg30                |
| Number of Scans        | 16                  |
| Receiver Gain          | 30.3                |
| Relaxation Delay       | 1.0000              |
| Pulse Width            | 11.7000             |
| Acquisition Time       | 4.0894              |
| Acquisition Date       | 2016-08-20T04:05:55 |
| Spectrometer Frequency | 400.13              |
| Spectral Width         | 8012.8              |
| Lowest Frequency       | -1555.6             |
| Nucleus                | 1H                  |
| Acquired Size          | 32768               |
| Spectral Size          | 65536               |

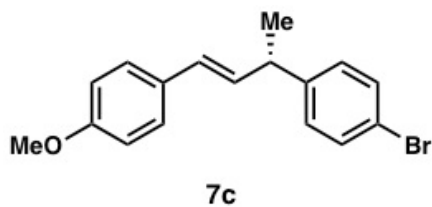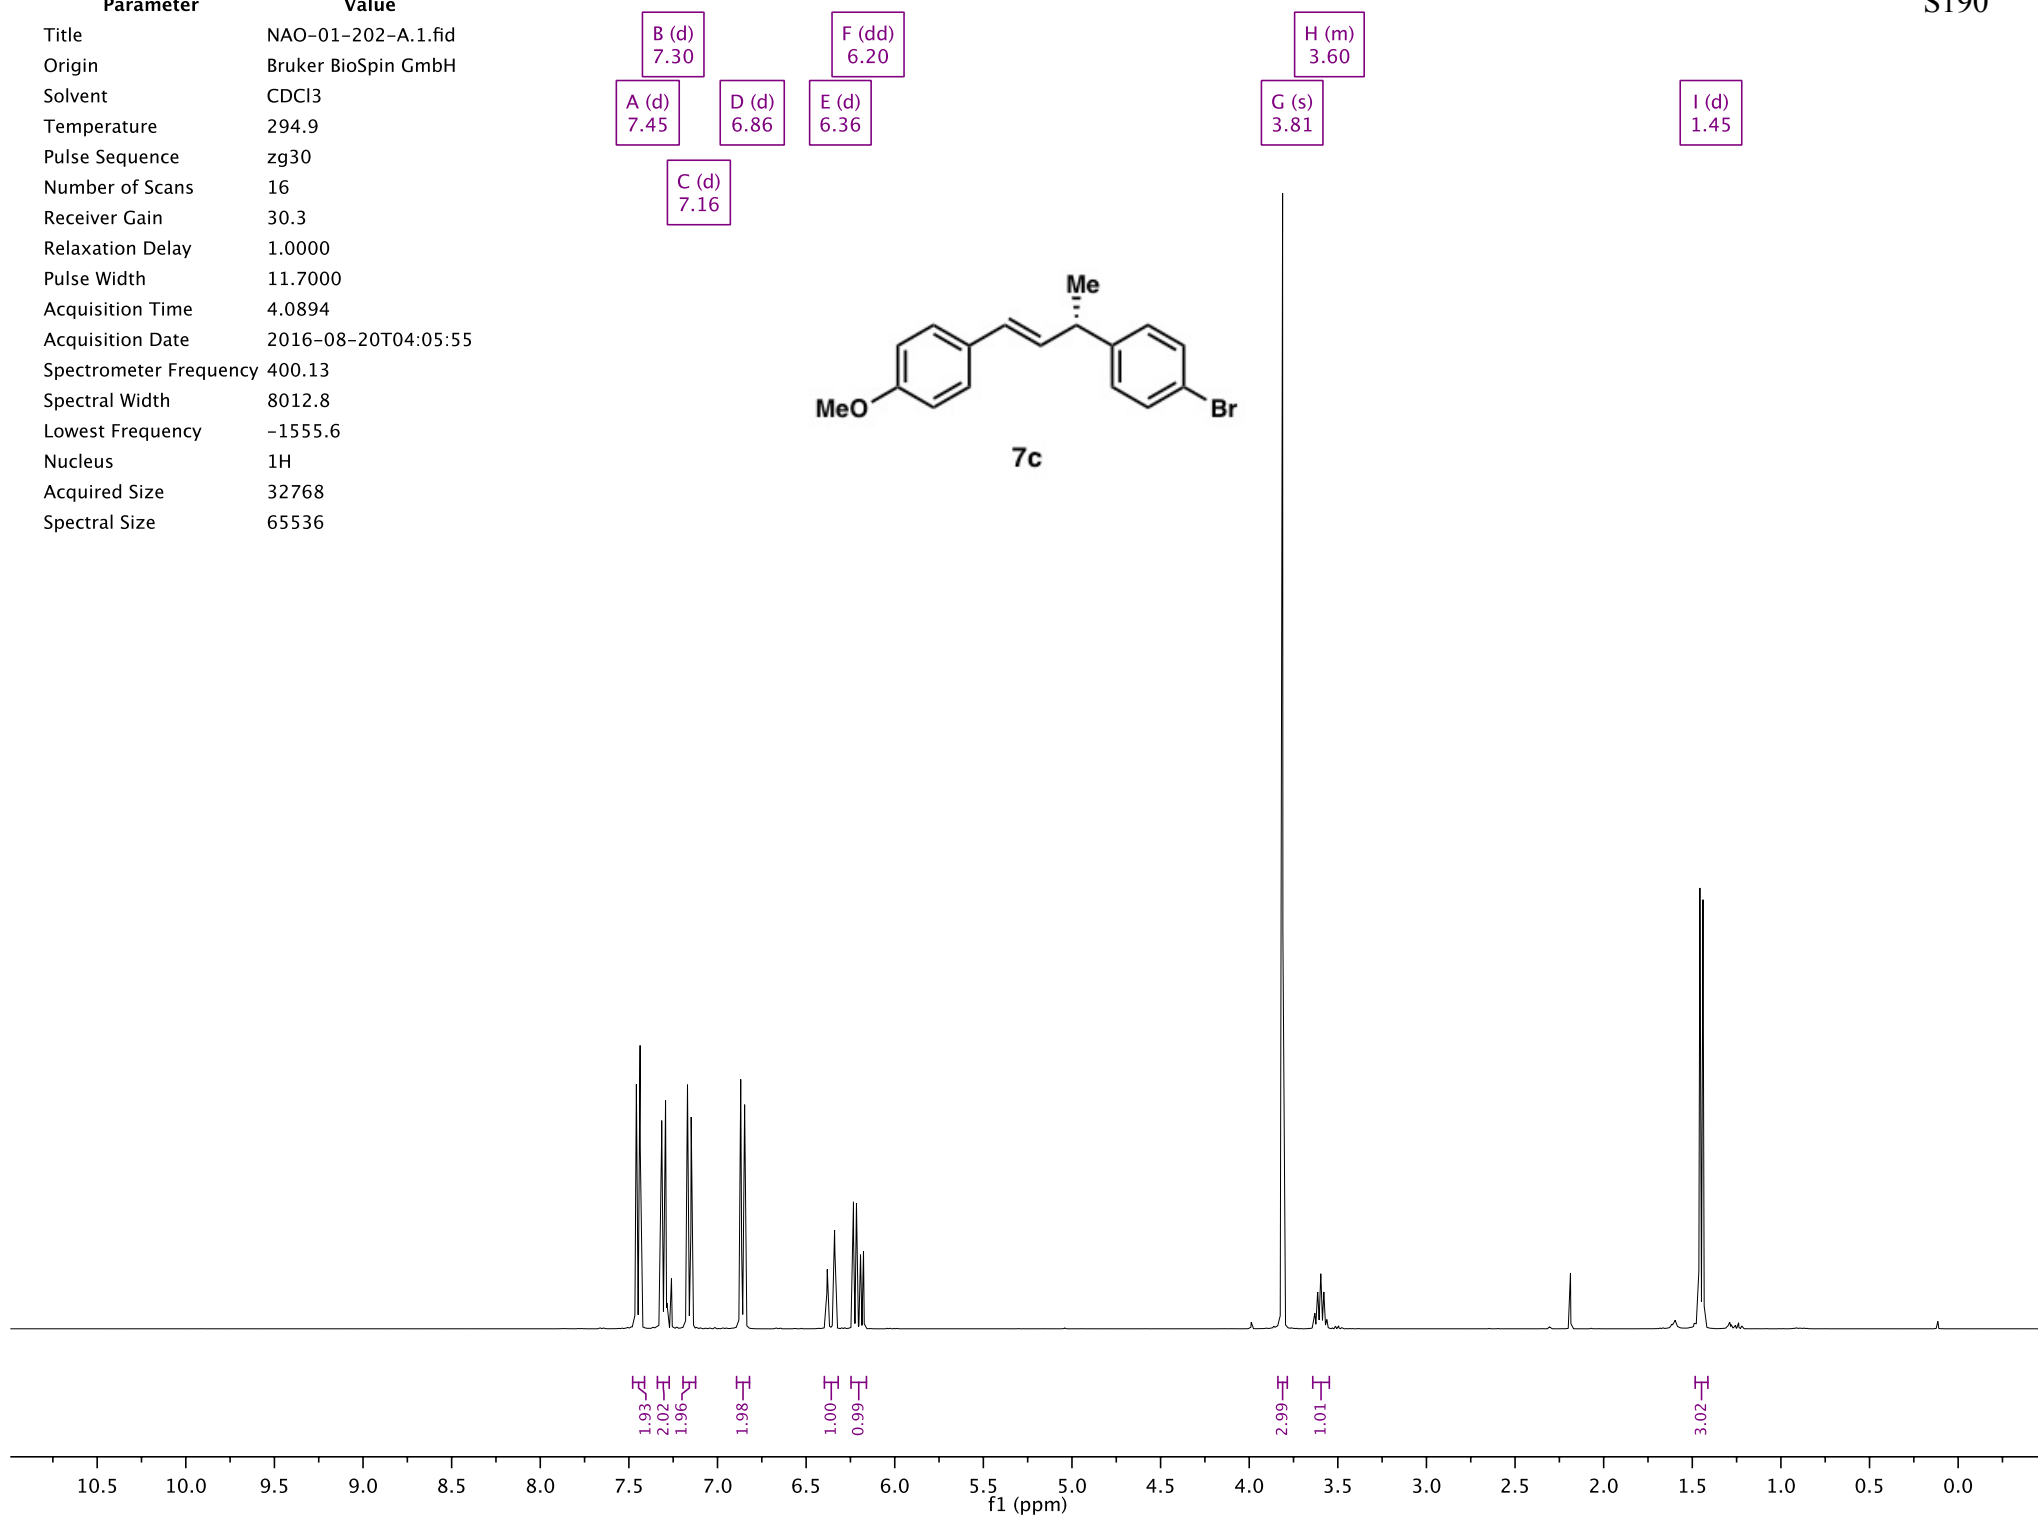

| Parameter              | Value               |
|------------------------|---------------------|
| Title                  | NAO-01-202-A.2.fid  |
| Origin                 | Bruker BioSpin GmbH |
| Solvent                | CDCl3               |
| Temperature            | 295.0               |
| Pulse Sequence         | zgpg30              |
| Number of Scans        | 128                 |
| Receiver Gain          | 72.0                |
| Relaxation Delay       | 2.0000              |
| Pulse Width            | 10.0000             |
| Acquisition Time       | 1.3631              |
| Acquisition Date       | 2016-08-20T04:13:52 |
| Spectrometer Frequency | 100.62              |
| Spectral Width         | 24038.5             |
| Lowest Frequency       | -1944.9             |
| Nucleus                | 13C                 |
| Acquired Size          | 32768               |
| Spectral Size          | 65536               |

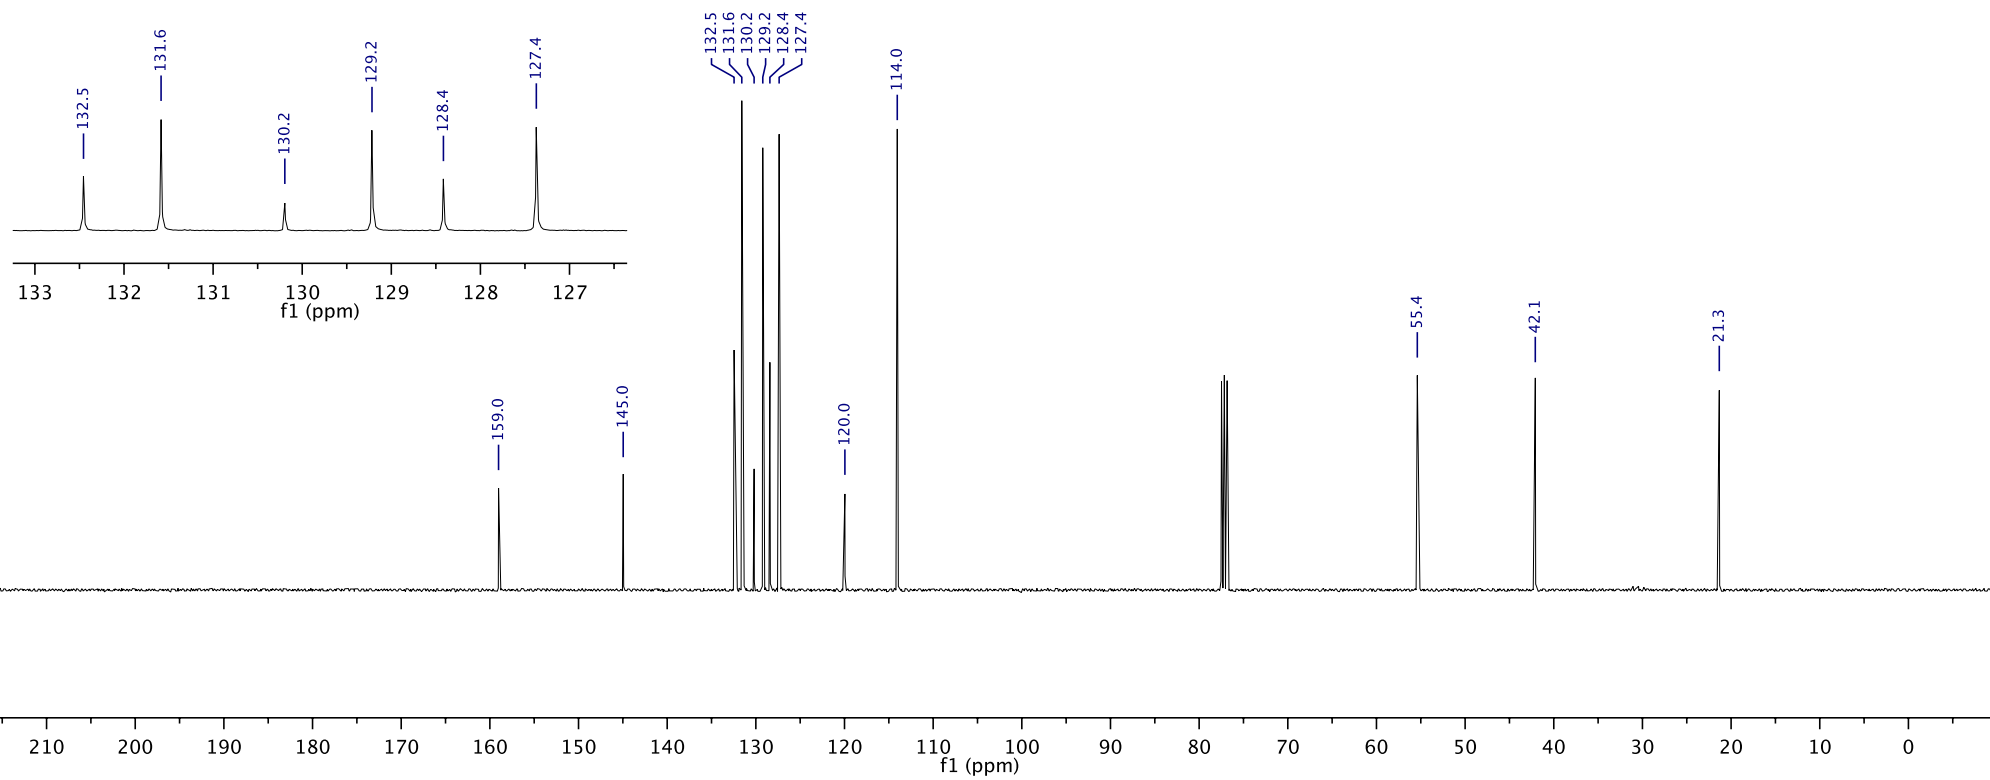

| Parameter              | Value               |
|------------------------|---------------------|
| Title                  | NAO-01-203-A.1.fid  |
| Origin                 | Bruker BioSpin GmbH |
| Solvent                | CDCl3               |
| Temperature            | 294.9               |
| Pulse Sequence         | zg30                |
| Number of Scans        | 16                  |
| Receiver Gain          | 30.3                |
| Relaxation Delay       | 1.0000              |
| Pulse Width            | 11.7000             |
| Acquisition Time       | 4.0894              |
| Acquisition Date       | 2016-08-20T06:02:09 |
| Spectrometer Frequency | 400.13              |
| Spectral Width         | 8012.8              |
| Lowest Frequency       | -1535.6             |
| Nucleus                | <sup>1</sup> H      |
| Acquired Size          | 32768               |
| Spectral Size          | 65536               |

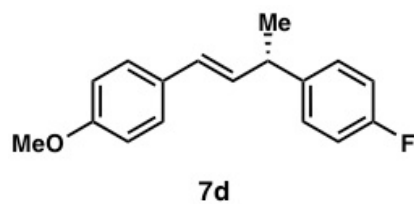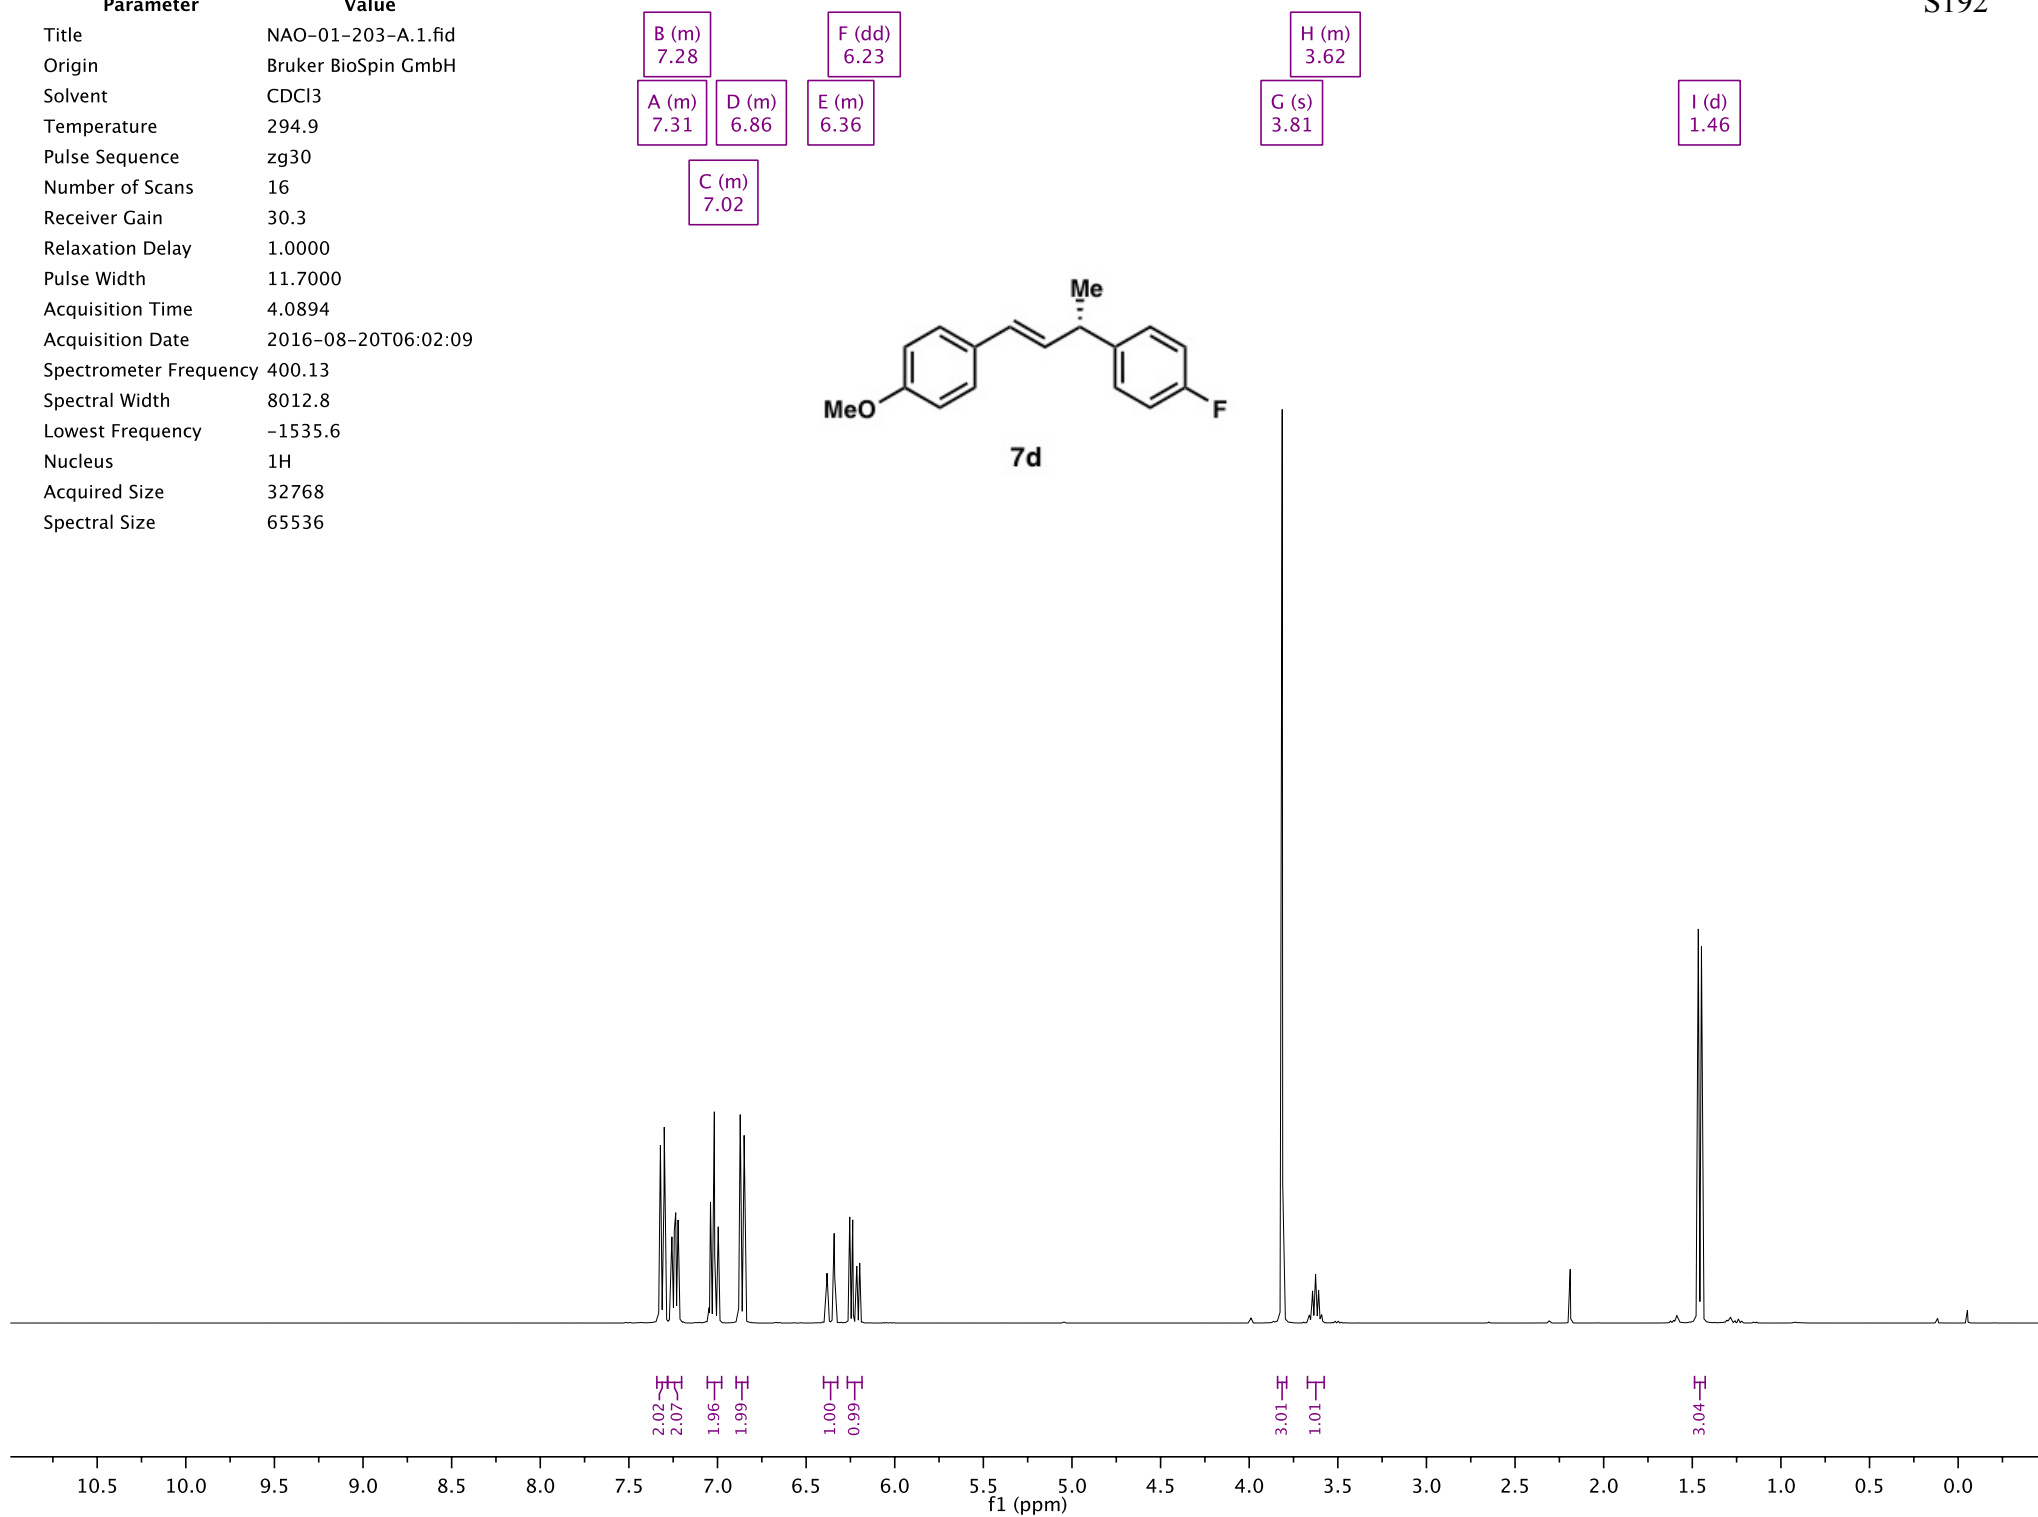

| Parameter              | Value               |
|------------------------|---------------------|
| Title                  | NAO-01-203-A.2.fid  |
| Origin                 | Bruker BioSpin GmbH |
| Solvent                | CDCl3               |
| Temperature            | 295.0               |
| Pulse Sequence         | zgpg30              |
| Number of Scans        | 128                 |
| Receiver Gain          | 72.0                |
| Relaxation Delay       | 2.0000              |
| Pulse Width            | 10.0000             |
| Acquisition Time       | 1.3631              |
| Acquisition Date       | 2016-08-20T06:10:06 |
| Spectrometer Frequency | 100.62              |
| Spectral Width         | 24038.5             |
| Lowest Frequency       | -1958.4             |
| Nucleus                | 13C                 |
| Acquired Size          | 32768               |
| Spectral Size          | 65536               |

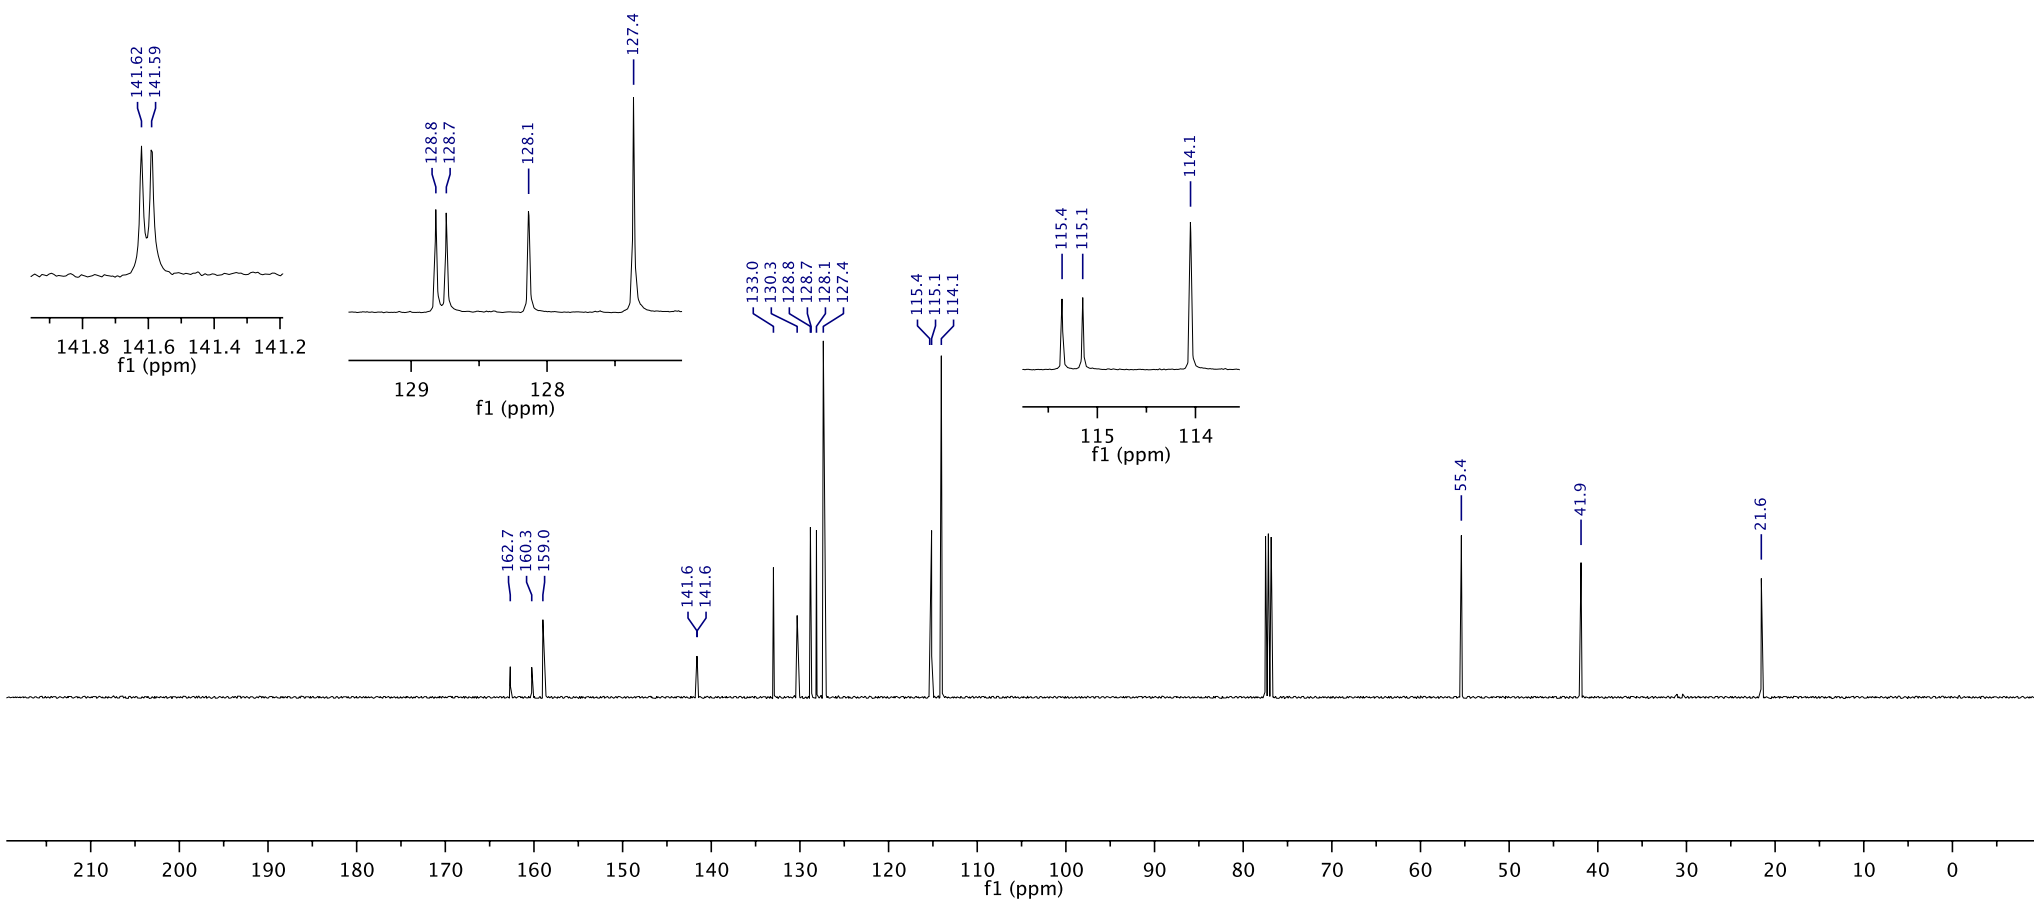

| Parameter              | Value               |
|------------------------|---------------------|
| Title                  | JLH-6-0408          |
| Origin                 | Varian              |
| Solvent                | "cdcl3"             |
| Temperature            | 25.0                |
| Pulse Sequence         | s2pul               |
| Number of Scans        | 16                  |
| Receiver Gain          | 30                  |
| Relaxation Delay       | 1.0000              |
| Pulse Width            | 6.3333              |
| Acquisition Time       | 0.9856              |
| Acquisition Date       | 2017-01-09T23:50:23 |
| Spectrometer Frequency | 282.34              |
| Spectral Width         | 64935.1             |
| Lowest Frequency       | -56468.7            |
| Nucleus                | 19F                 |
| Acquired Size          | 64000               |
| Spectral Size          | 131072              |



A (tt)  
-123.56

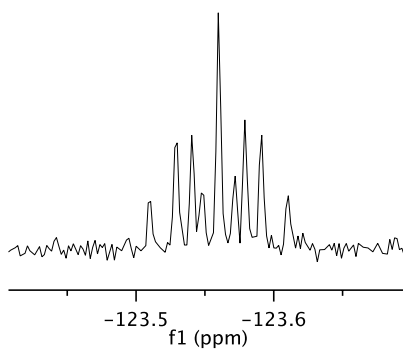

1.00

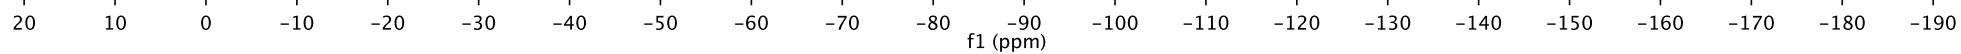

| Parameter              | Value               |
|------------------------|---------------------|
| Title                  | JLH-6-040B-C6F6     |
| Origin                 | Varian              |
| Solvent                | "cdcl3"             |
| Temperature            | 25.0                |
| Pulse Sequence         | s2pul               |
| Number of Scans        | 16                  |
| Receiver Gain          | 30                  |
| Relaxation Delay       | 1.0000              |
| Pulse Width            | 6.3333              |
| Acquisition Time       | 0.9856              |
| Acquisition Date       | 2017-01-09T23:53:59 |
| Spectrometer Frequency | 282.34              |
| Spectral Width         | 64935.1             |
| Lowest Frequency       | -56468.7            |
| Nucleus                | 19F                 |
| Acquired Size          | 64000               |
| Spectral Size          | 131072              |

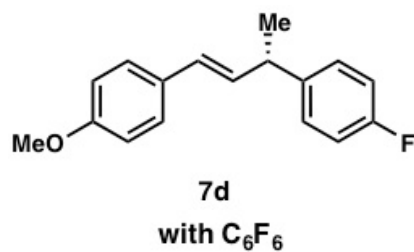

A (tt)  
-123.56

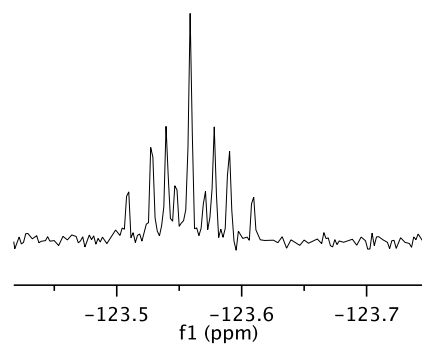

1.00

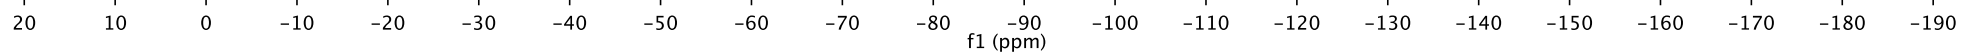

| Parameter              | Value               |
|------------------------|---------------------|
| Title                  | NAO-02-090-B.1.fid  |
| Origin                 | Bruker BioSpin GmbH |
| Solvent                | CDCl3               |
| Temperature            | 295.0               |
| Pulse Sequence         | zg30                |
| Number of Scans        | 16                  |
| Receiver Gain          | 127.1               |
| Relaxation Delay       | 1.0000              |
| Pulse Width            | 11.7000             |
| Acquisition Time       | 4.0894              |
| Acquisition Date       | 2017-01-10T01:11:22 |
| Spectrometer Frequency | 400.13              |
| Spectral Width         | 8012.8              |
| Lowest Frequency       | -1535.6             |
| Nucleus                | <sup>1</sup> H      |
| Acquired Size          | 32768               |
| Spectral Size          | 65536               |

|       |       |        |
|-------|-------|--------|
| B (d) | D (d) | F (dd) |
| 7.15  | 6.73  | 6.23   |
| A (d) | C (d) | E (dd) |
| 7.29  | 6.83  | 6.34   |
| G (s) | H (m) | I (s)  |
| 3.80  | 3.54  | 2.93   |
| J (d) |       |        |
| 1.42  |       |        |

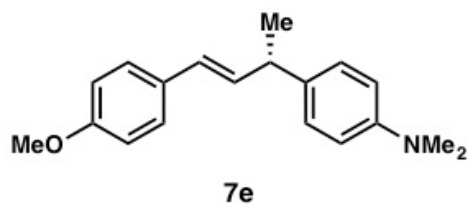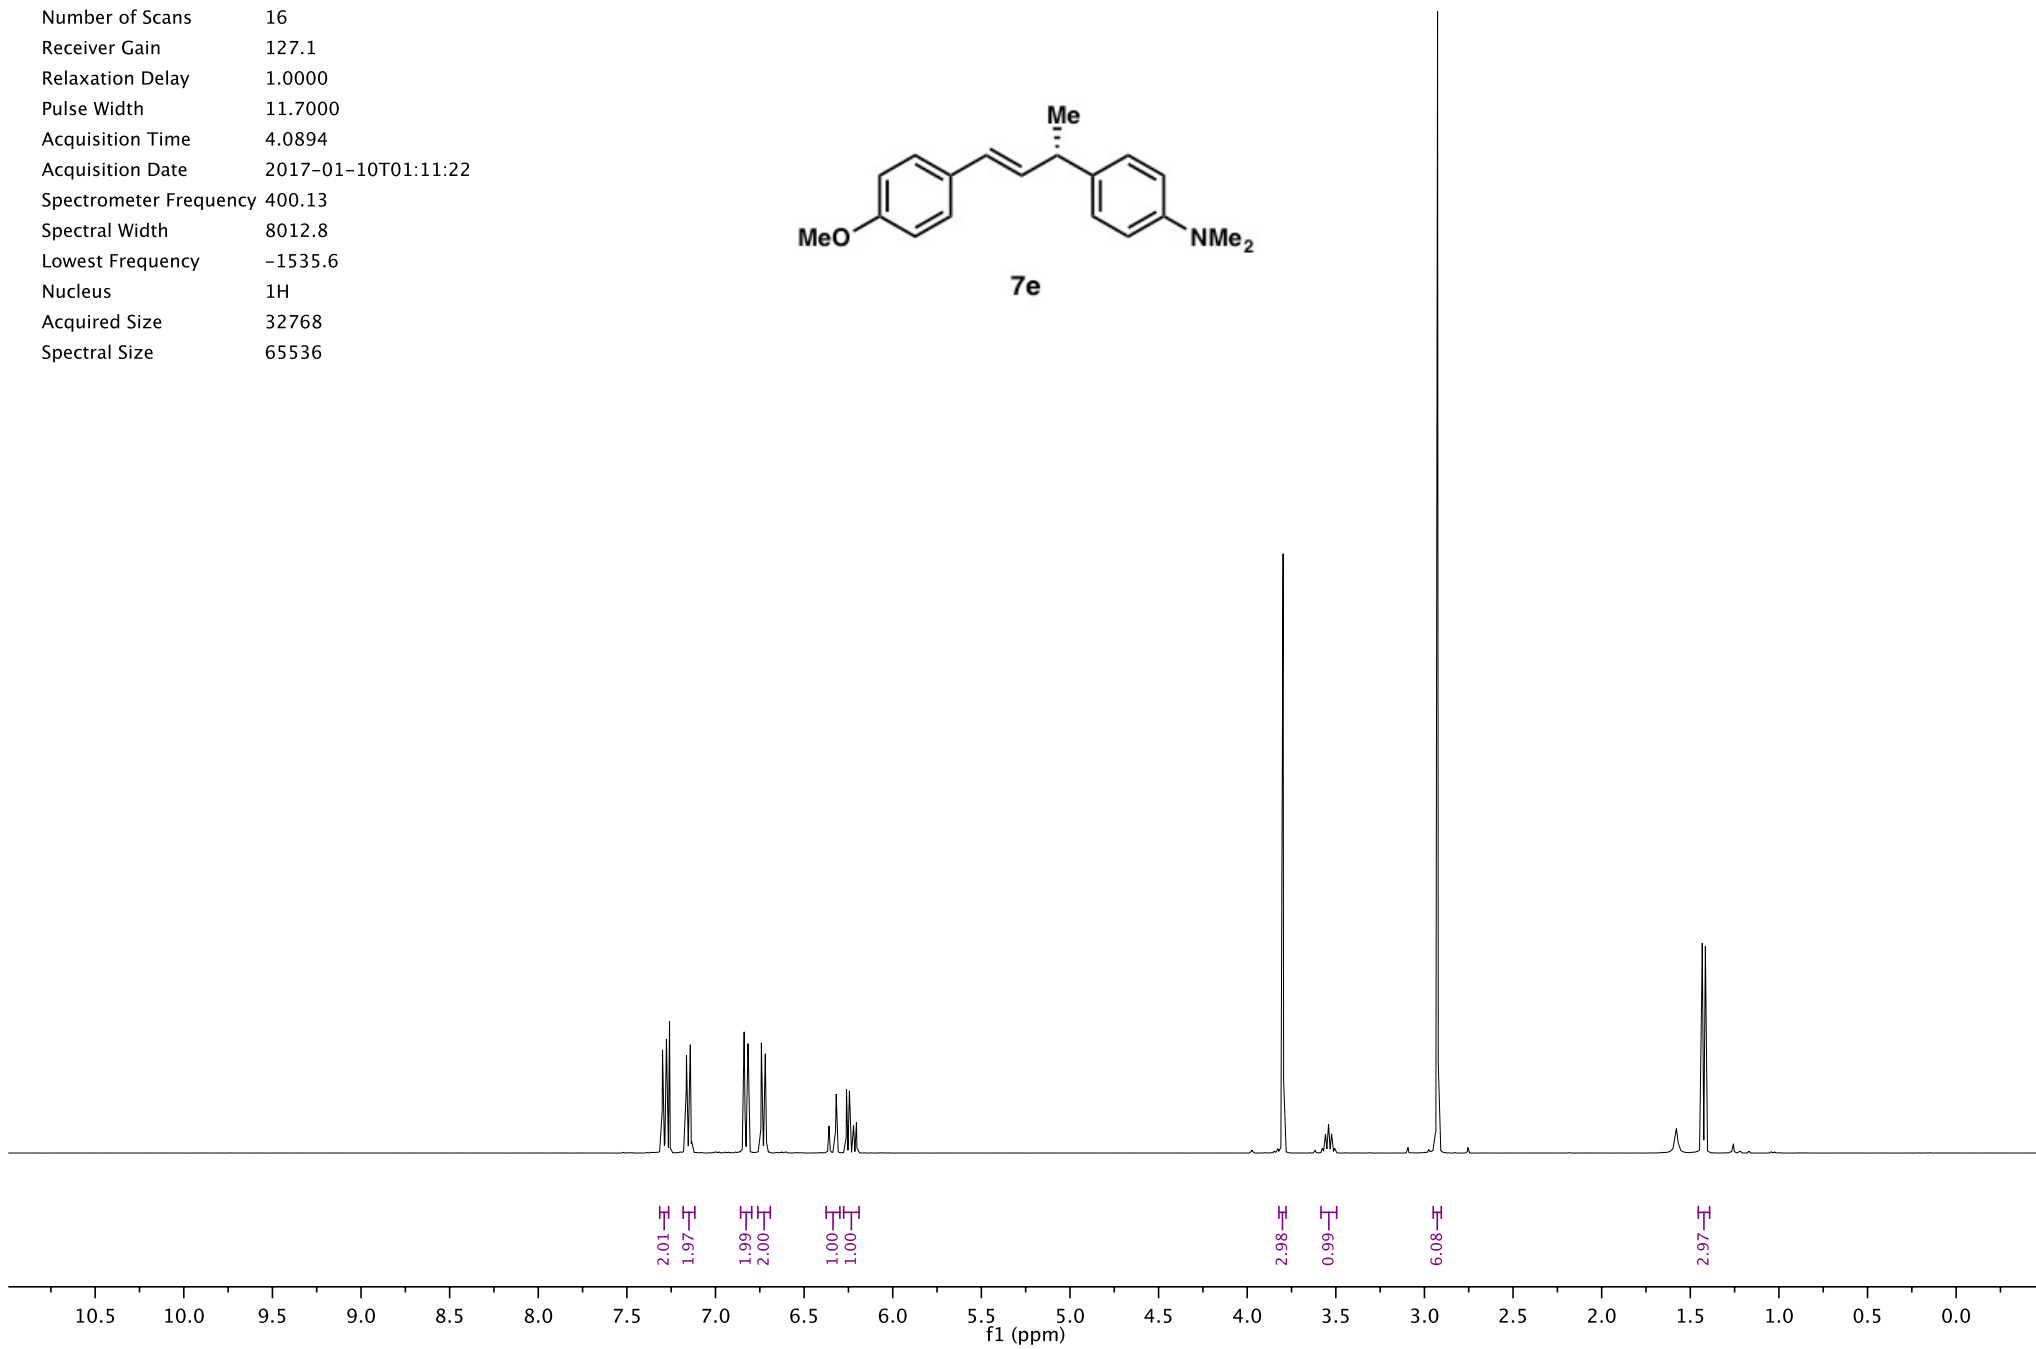



| Parameter              | Value               |
|------------------------|---------------------|
| Title                  | NAO-02-090-B.2.fid  |
| Origin                 | Bruker BioSpin GmbH |
| Solvent                | CDCl3               |
| Temperature            | 295.0               |
| Pulse Sequence         | zgpg30              |
| Number of Scans        | 124                 |
| Receiver Gain          | 87.8                |
| Relaxation Delay       | 2.0000              |
| Pulse Width            | 10.0000             |
| Acquisition Time       | 1.3631              |
| Acquisition Date       | 2017-01-10T01:19:06 |
| Spectrometer Frequency | 100.62              |
| Spectral Width         | 24038.5             |
| Lowest Frequency       | -1958.4             |
| Nucleus                | 13C                 |
| Acquired Size          | 32768               |
| Spectral Size          | 65536               |

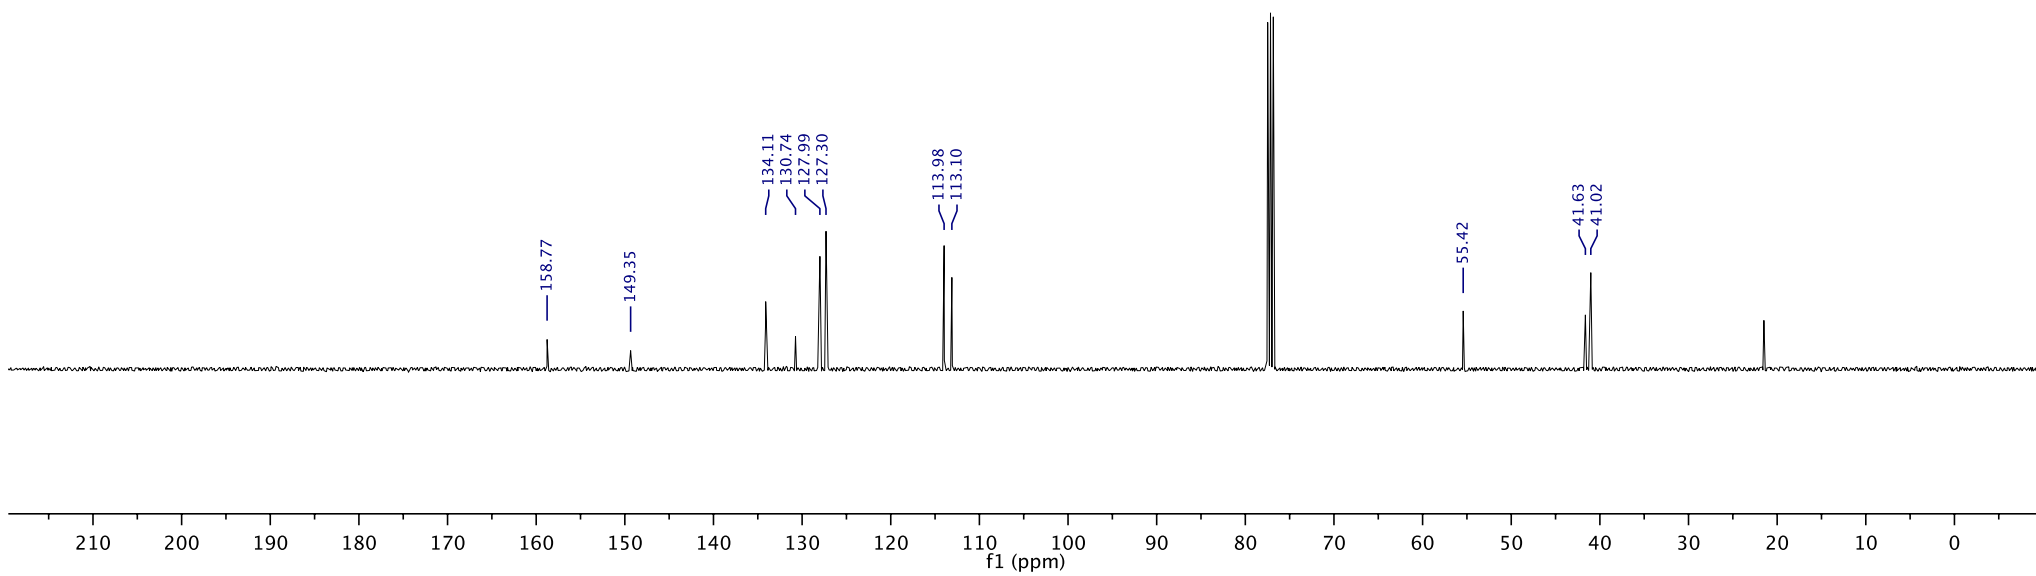

| Parameter              | Value               |
|------------------------|---------------------|
| Title                  | NAO-02-029-B.1.fid  |
| Origin                 | Bruker BioSpin GmbH |
| Solvent                | CDCl3               |
| Temperature            | 295.0               |
| Pulse Sequence         | zg30                |
| Number of Scans        | 16                  |
| Receiver Gain          | 87.8                |
| Relaxation Delay       | 1.0000              |
| Pulse Width            | 11.7000             |
| Acquisition Time       | 4.0894              |
| Acquisition Date       | 2017-01-06T21:11:19 |
| Spectrometer Frequency | 400.13              |
| Spectral Width         | 8012.8              |
| Lowest Frequency       | -1535.6             |
| Nucleus                | <sup>1</sup> H      |
| Acquired Size          | 32768               |
| Spectral Size          | 65536               |

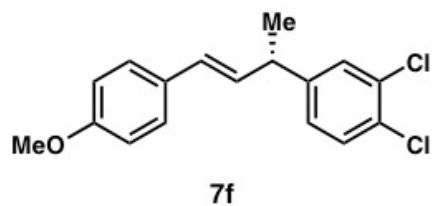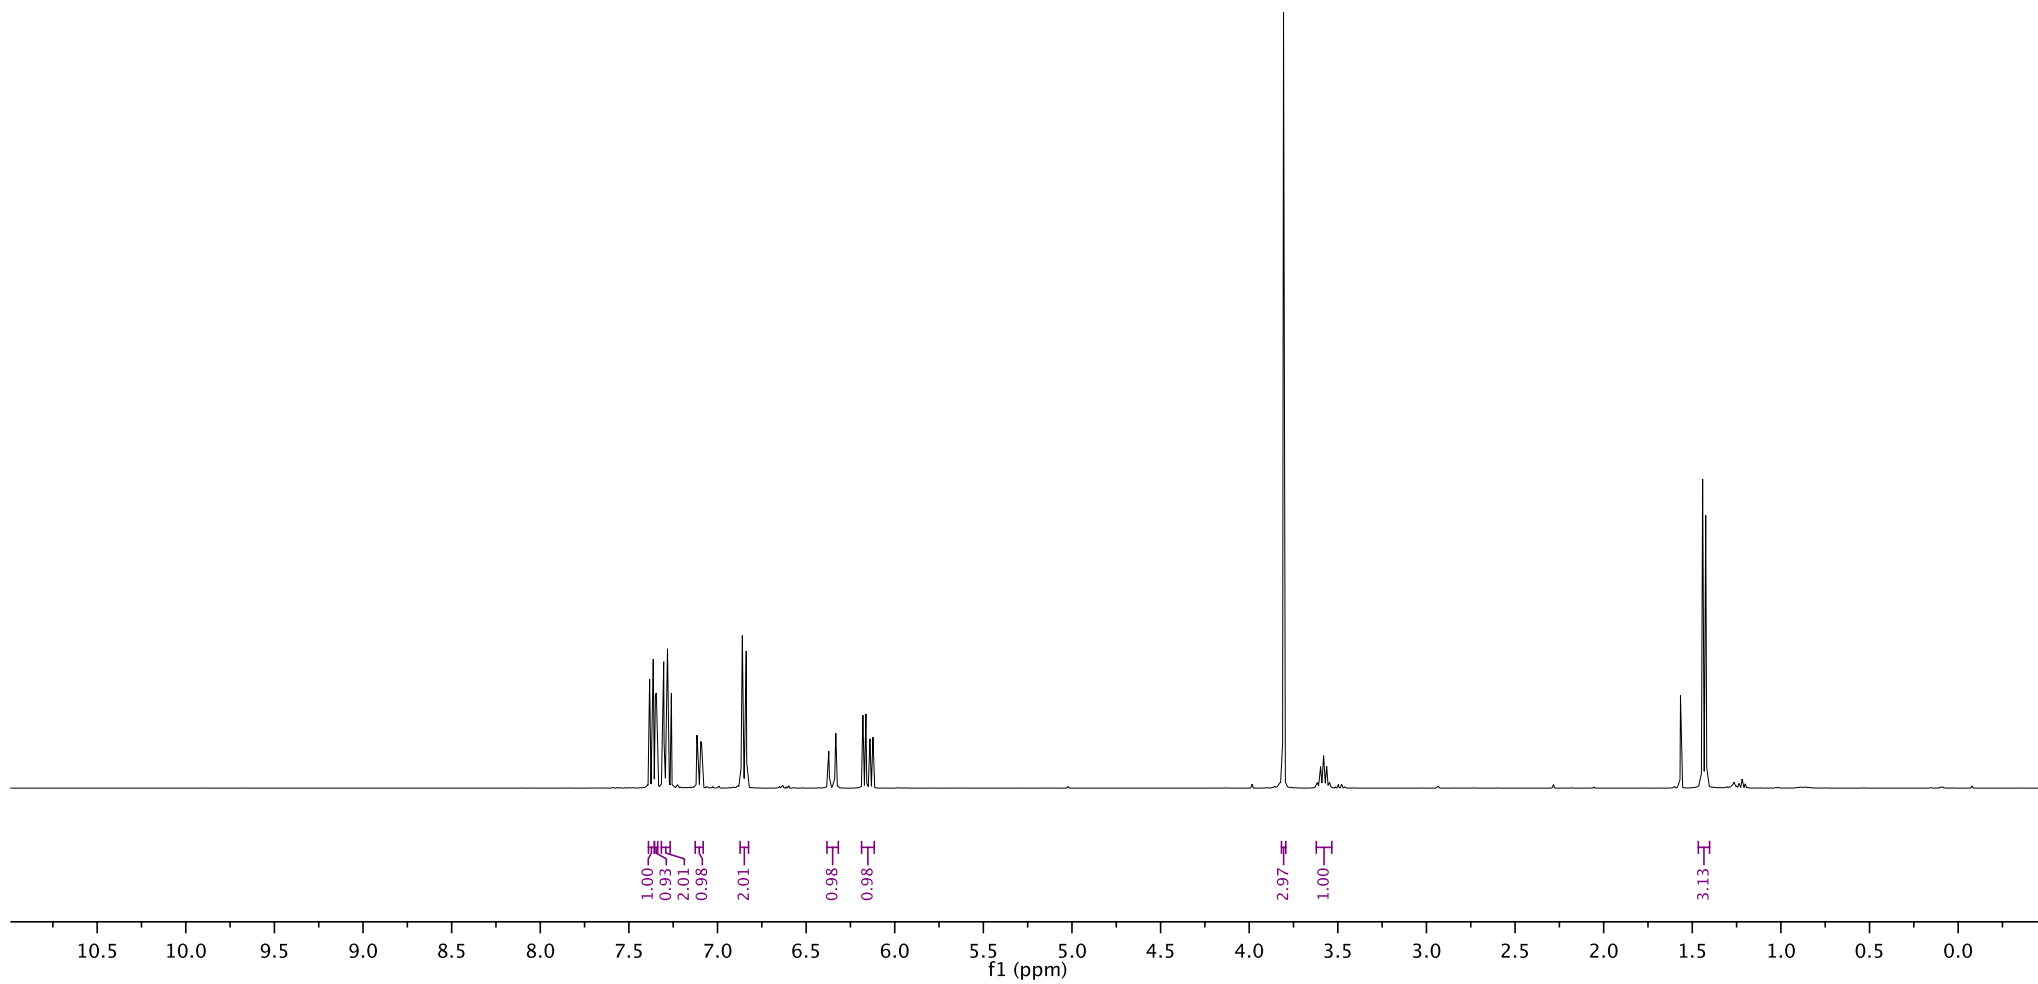

| Parameter              | Value               |
|------------------------|---------------------|
| Title                  | NAO-02-029-B.2.fid  |
| Origin                 | Bruker BioSpin GmbH |
| Solvent                | CDCl3               |
| Temperature            | 294.9               |
| Pulse Sequence         | zgpg30              |
| Number of Scans        | 128                 |
| Receiver Gain          | 55.5                |
| Relaxation Delay       | 2.0000              |
| Pulse Width            | 10.0000             |
| Acquisition Time       | 1.3631              |
| Acquisition Date       | 2017-01-06T21:19:16 |
| Spectrometer Frequency | 100.62              |
| Spectral Width         | 24038.5             |
| Lowest Frequency       | -1958.4             |
| Nucleus                | <sup>13</sup> C     |
| Acquired Size          | 32768               |
| Spectral Size          | 65536               |

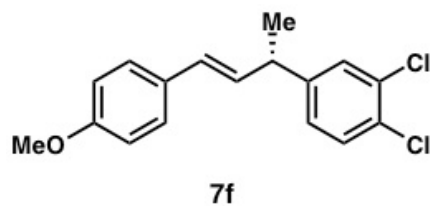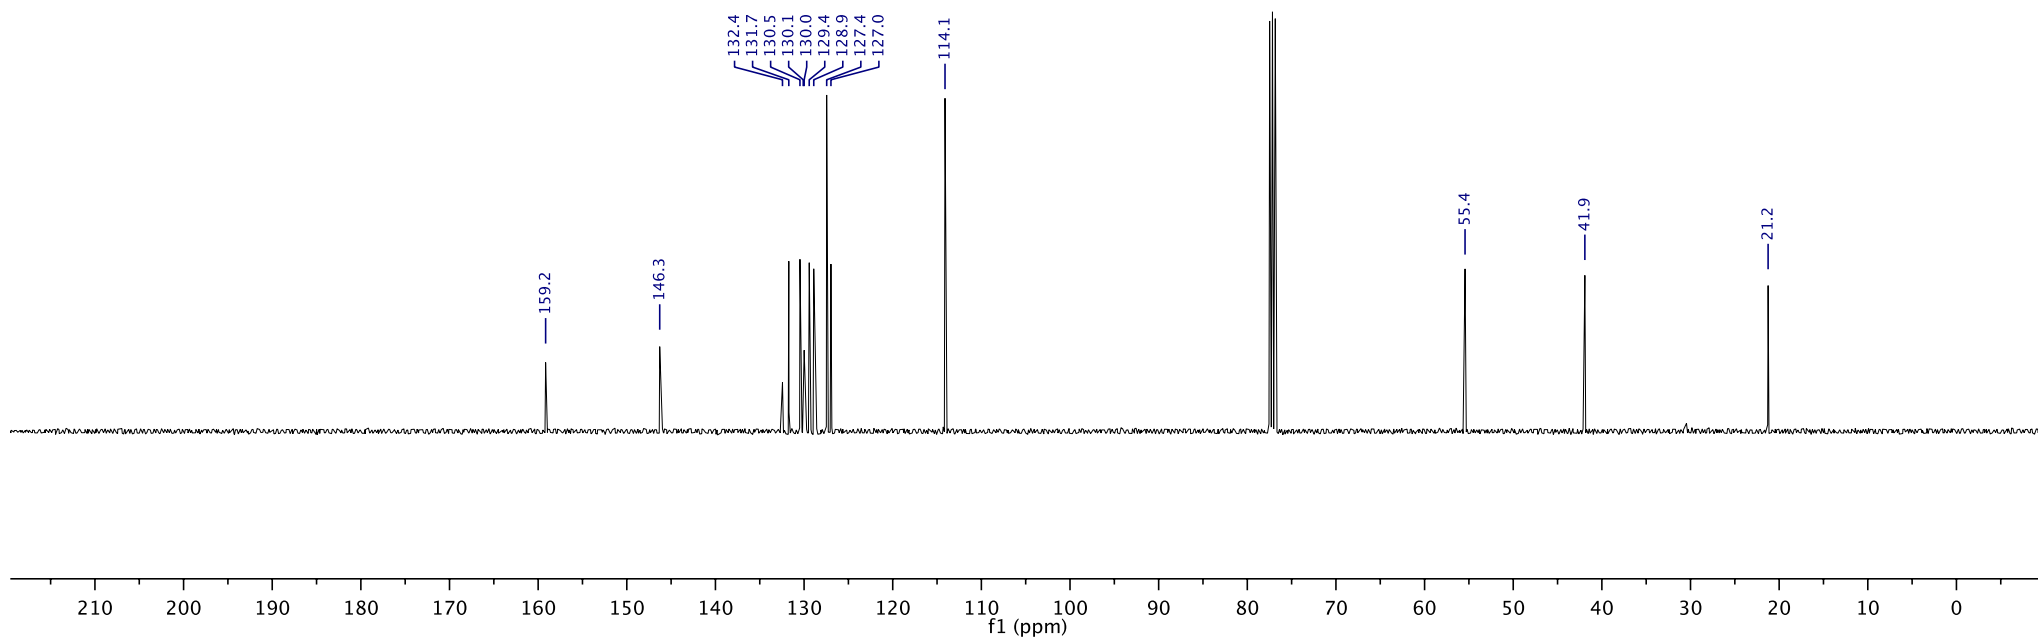

| Parameter              | Value               |
|------------------------|---------------------|
| Title                  | NAO-01-178-B.1.fid  |
| Origin                 | Bruker BioSpin GmbH |
| Solvent                | CDCl3               |
| Temperature            | 294.9               |
| Pulse Sequence         | zg30                |
| Number of Scans        | 16                  |
| Receiver Gain          | 55.5                |
| Relaxation Delay       | 1.0000              |
| Pulse Width            | 11.7000             |
| Acquisition Time       | 4.0894              |
| Acquisition Date       | 2016-07-21T06:50:06 |
| Spectrometer Frequency | 400.13              |
| Spectral Width         | 8012.8              |
| Lowest Frequency       | -1555.6             |
| Nucleus                | 1H                  |
| Acquired Size          | 32768               |
| Spectral Size          | 65536               |

|       |       |       |        |       |       |       |       |
|-------|-------|-------|--------|-------|-------|-------|-------|
| A (m) | B (d) | C (d) | D (dd) | E (s) | F (m) | G (m) | H (t) |
| 7.28  | 6.84  | 6.37  | 6.21   | 3.80  | 3.31  | 1.84  | 0.93  |

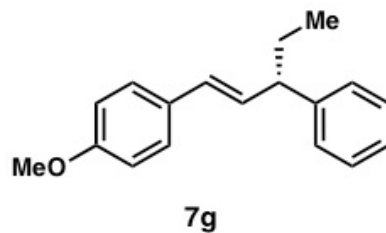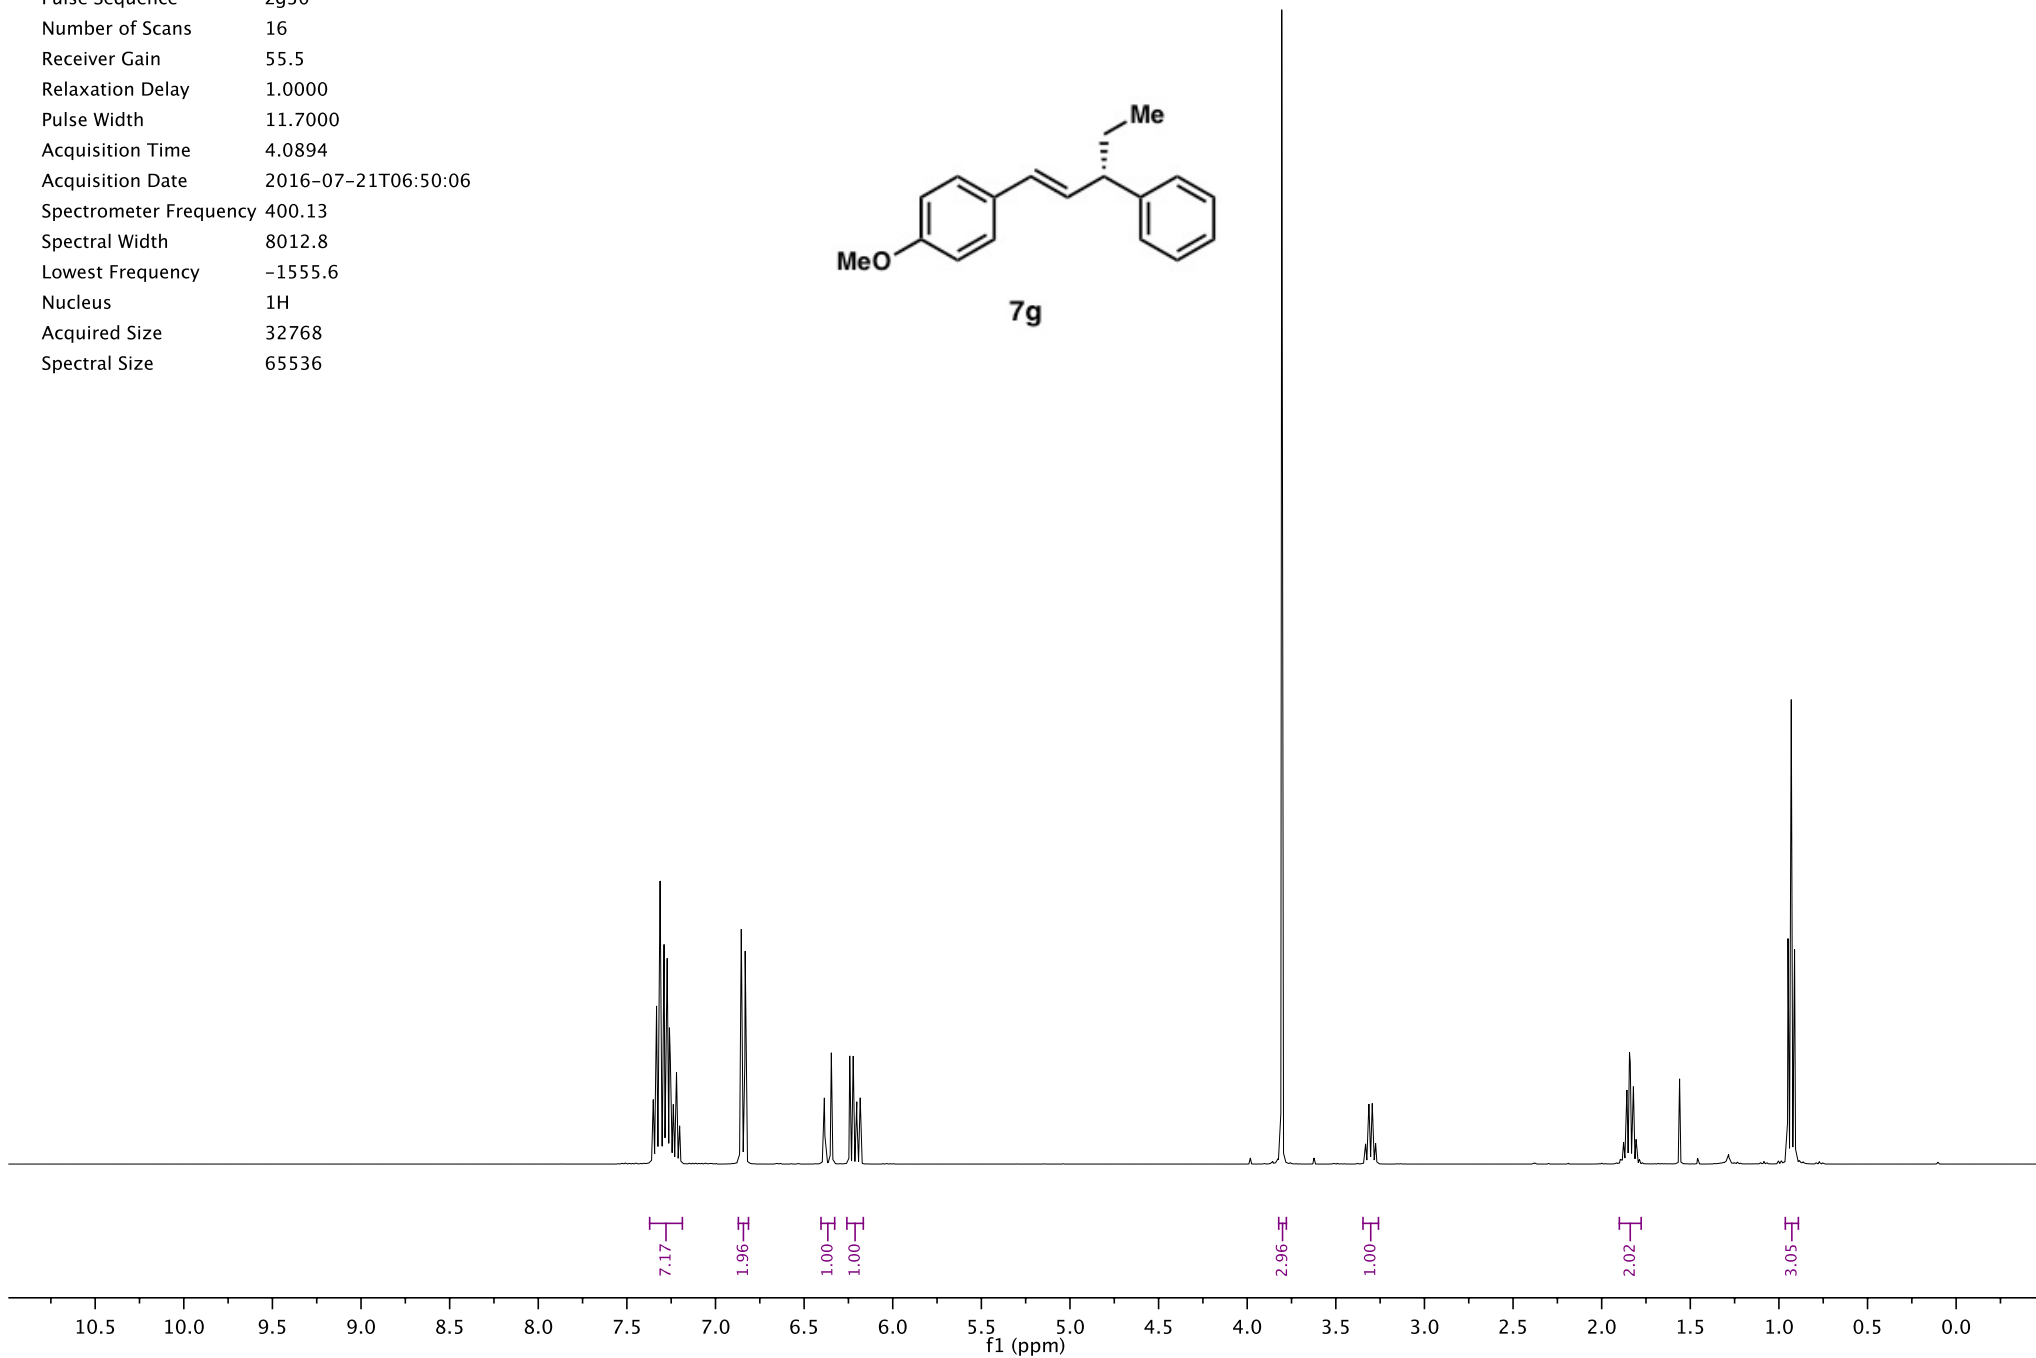

| Parameter              | Value               |
|------------------------|---------------------|
| Title                  | NAO-01-178-B.2.fid  |
| Origin                 | Bruker BioSpin GmbH |
| Solvent                | CDCl3               |
| Temperature            | 295.0               |
| Pulse Sequence         | zgpg30              |
| Number of Scans        | 128                 |
| Receiver Gain          | 78.7                |
| Relaxation Delay       | 2.0000              |
| Pulse Width            | 10.0000             |
| Acquisition Time       | 1.3631              |
| Acquisition Date       | 2016-07-21T06:57:56 |
| Spectrometer Frequency | 100.62              |
| Spectral Width         | 24038.5             |
| Lowest Frequency       | -1939.0             |
| Nucleus                | <sup>13</sup> C     |
| Acquired Size          | 32768               |
| Spectral Size          | 65536               |

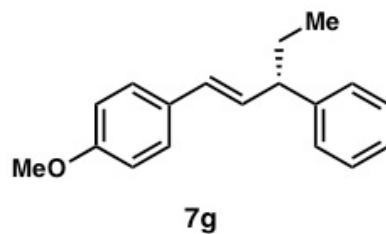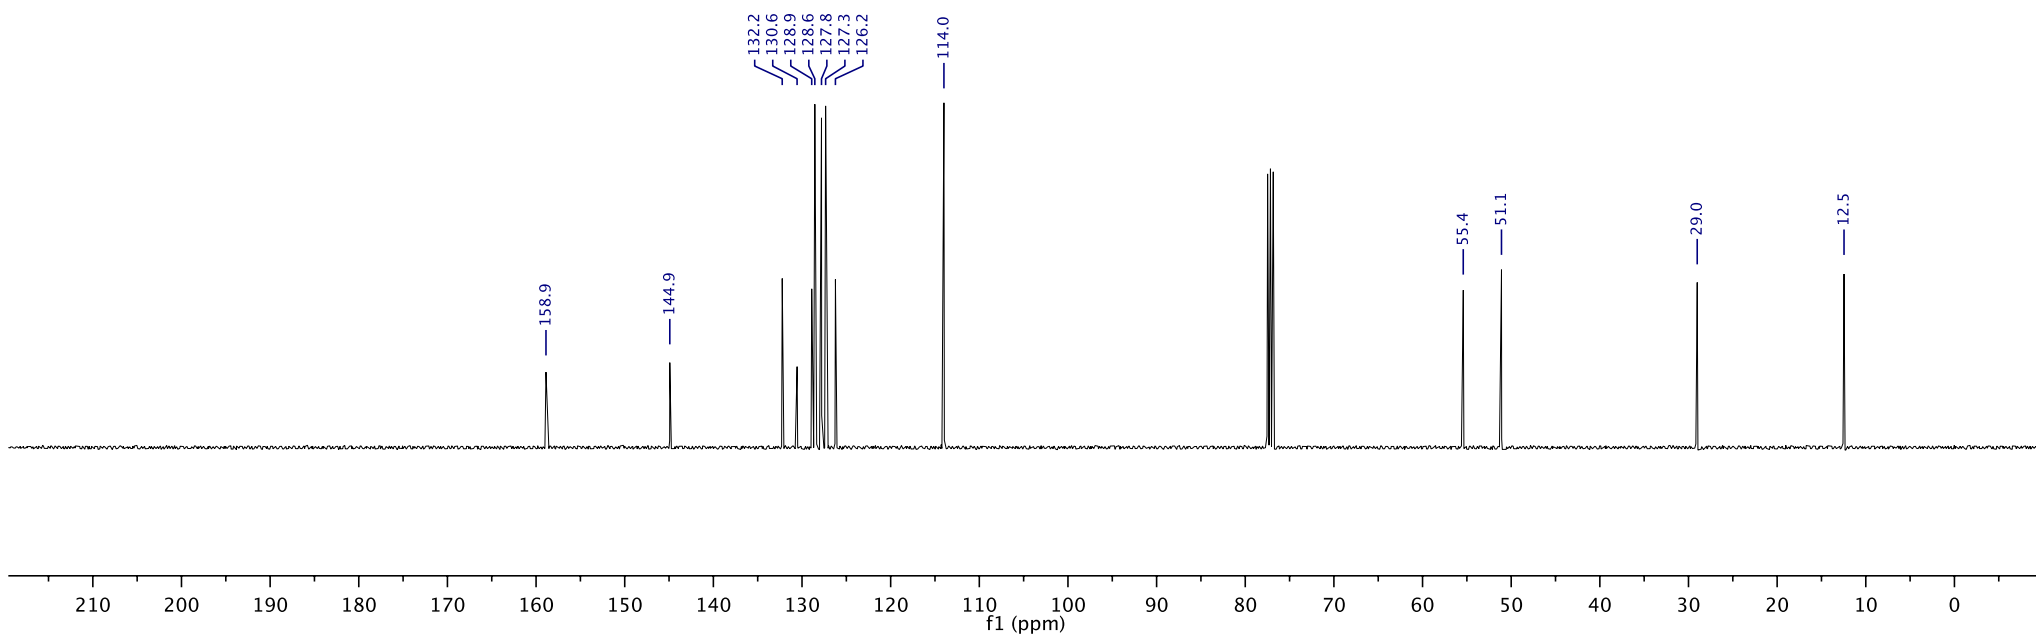

| Parameter              | Value                 |
|------------------------|-----------------------|
| Title                  | NAO-01-179-A-02.1.fid |
| Origin                 | Bruker BioSpin GmbH   |
| Solvent                | CDCl3                 |
| Temperature            | 294.9                 |
| Pulse Sequence         | zg30                  |
| Number of Scans        | 16                    |
| Receiver Gain          | 64.2                  |
| Relaxation Delay       | 1.0000                |
| Pulse Width            | 11.7000               |
| Acquisition Time       | 4.0894                |
| Acquisition Date       | 2016-08-24T09:23:23   |
| Spectrometer Frequency | 400.13                |
| Spectral Width         | 8012.8                |
| Lowest Frequency       | -1555.6               |
| Nucleus                | <sup>1</sup> H        |
| Acquired Size          | 32768                 |
| Spectral Size          | 65536                 |

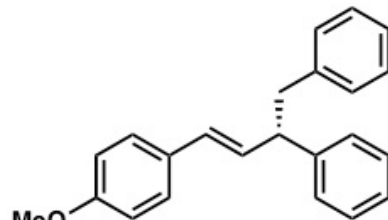

|       |      |       |      |       |      |       |      |
|-------|------|-------|------|-------|------|-------|------|
| B (d) | 7.10 | E (d) | 6.25 | G (m) | 3.72 |       |      |
| A (m) | 7.25 | C (d) | 6.83 | F (s) | 3.80 | H (m) | 3.13 |

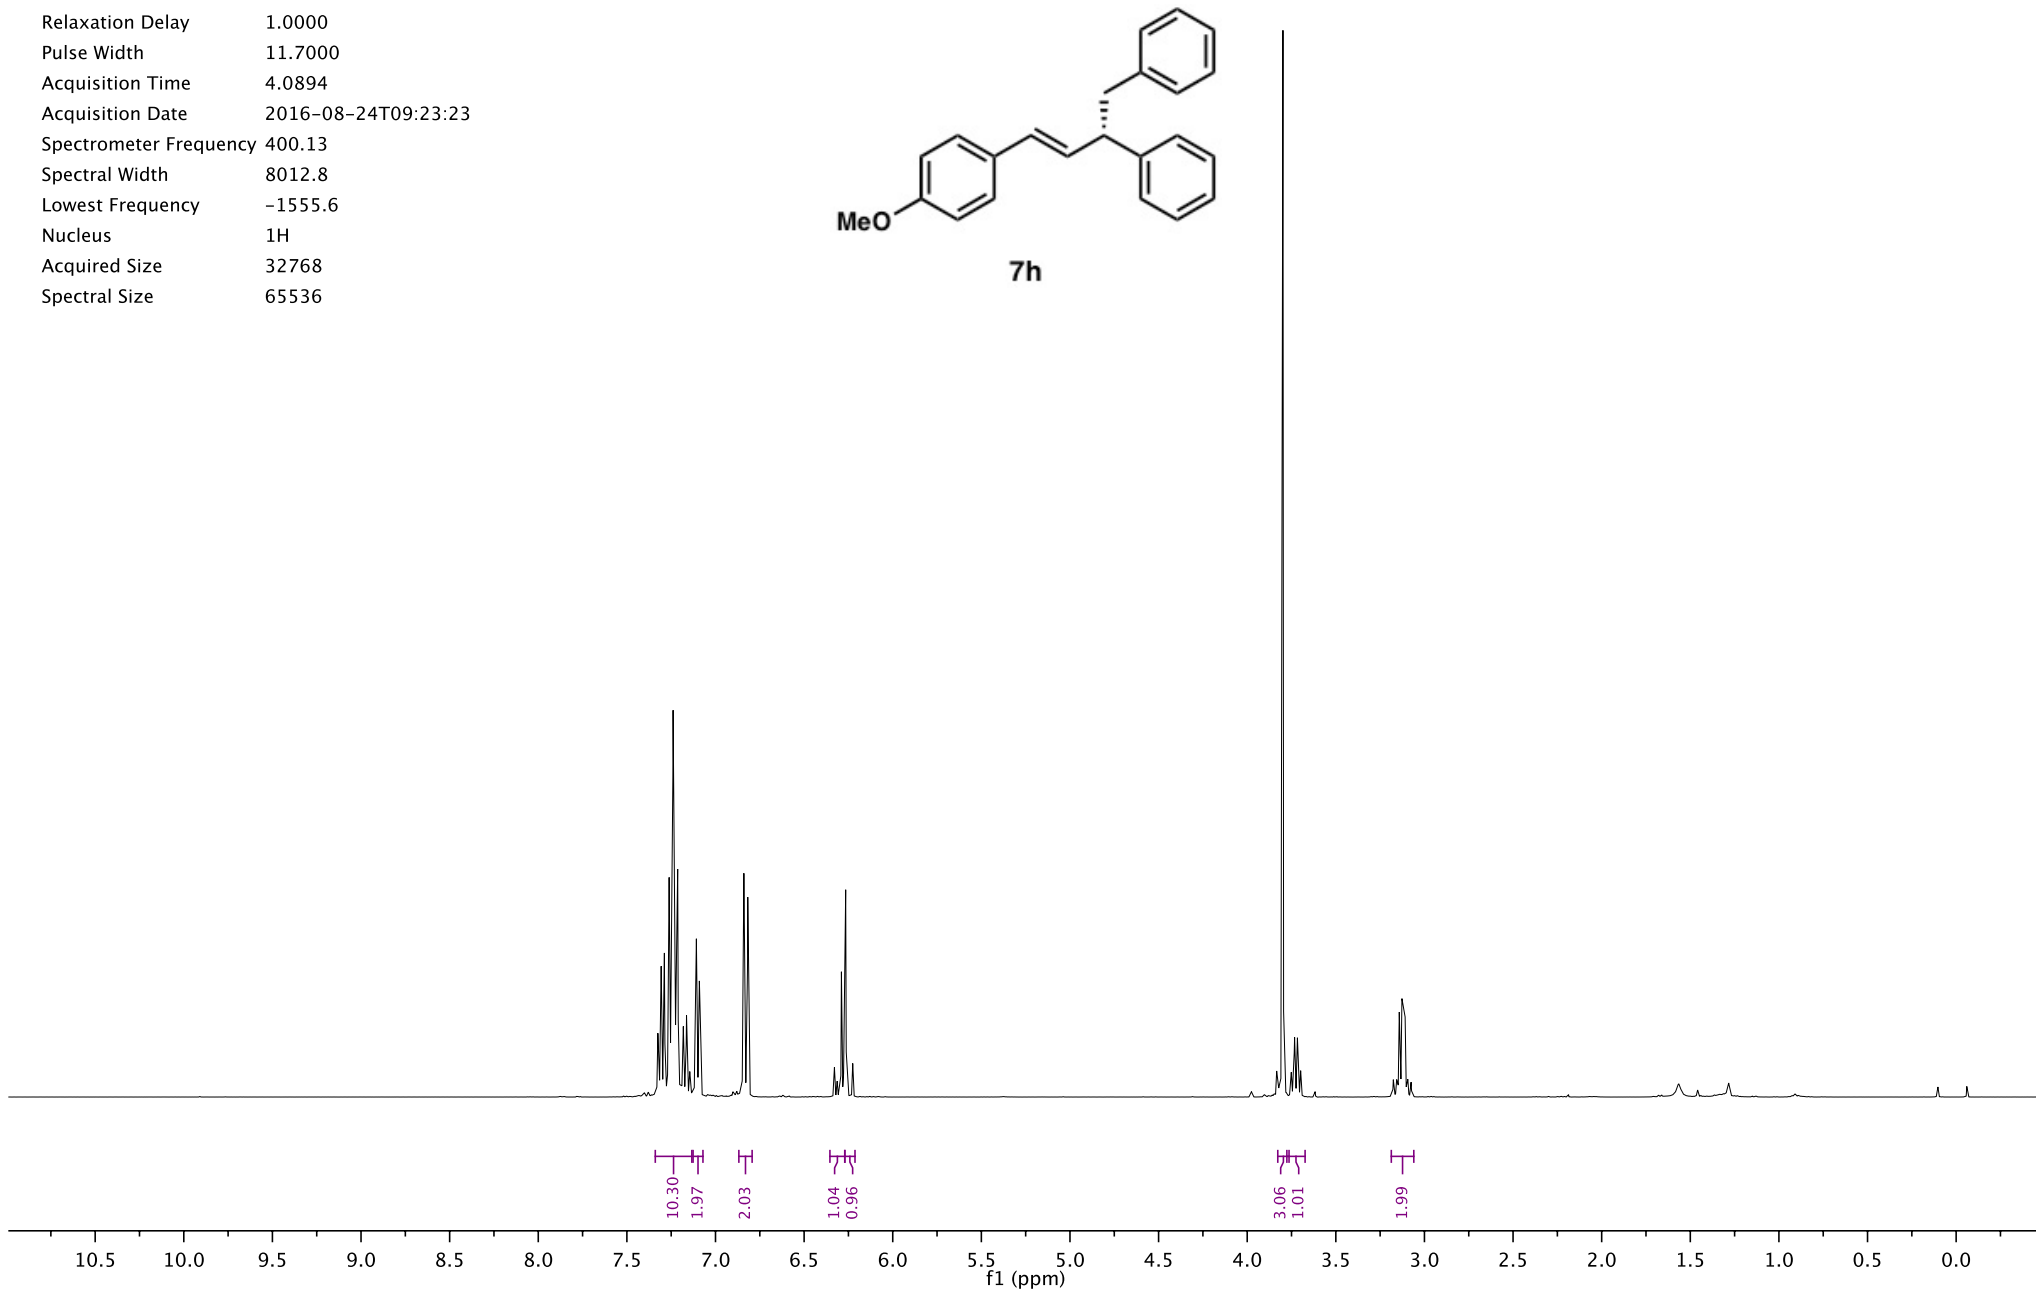

| Parameter              | Value                 |
|------------------------|-----------------------|
| Title                  | NAO-01-179-A-02.2.fid |
| Origin                 | Bruker BioSpin GmbH   |
| Solvent                | CDCl3                 |
| Temperature            | 295.0                 |
| Pulse Sequence         | zgpg30                |
| Number of Scans        | 128                   |
| Receiver Gain          | 78.7                  |
| Relaxation Delay       | 2.0000                |
| Pulse Width            | 10.0000               |
| Acquisition Time       | 1.3631                |
| Acquisition Date       | 2016-08-24T09:31:20   |
| Spectrometer Frequency | 100.62                |
| Spectral Width         | 24038.5               |
| Lowest Frequency       | -1939.9               |
| Nucleus                | 13C                   |
| Acquired Size          | 32768                 |
| Spectral Size          | 65536                 |

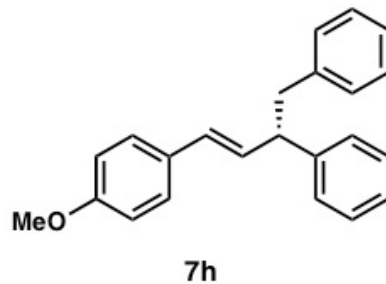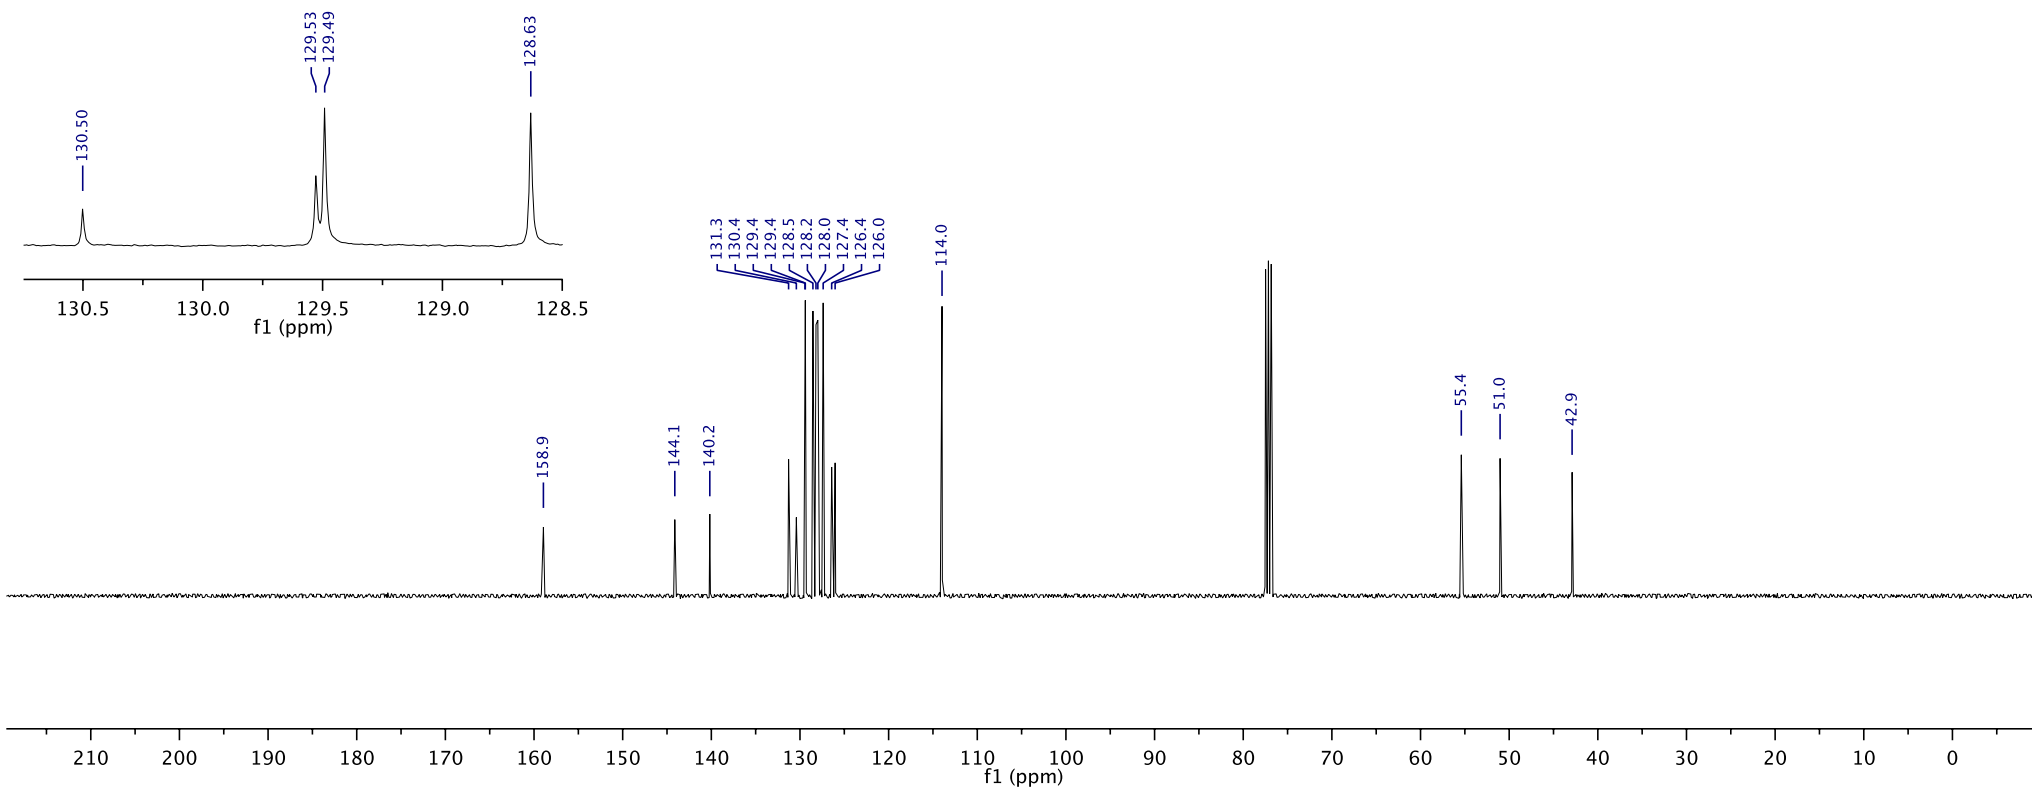

| Parameter              | Value               |
|------------------------|---------------------|
| Title                  | NAO-01-191-B.1.fid  |
| Origin                 | Bruker BioSpin GmbH |
| Solvent                | CDCl3               |
| Temperature            | 294.9               |
| Pulse Sequence         | zg30                |
| Number of Scans        | 16                  |
| Receiver Gain          | 30.3                |
| Relaxation Delay       | 1.0000              |
| Pulse Width            | 11.7000             |
| Acquisition Time       | 4.0894              |
| Acquisition Date       | 2016-08-20T03:07:45 |
| Spectrometer Frequency | 400.13              |
| Spectral Width         | 8012.8              |
| Lowest Frequency       | -1555.6             |
| Nucleus                | 1H                  |
| Acquired Size          | 32768               |
| Spectral Size          | 65536               |

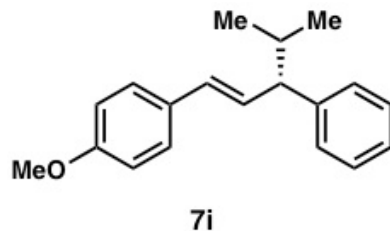

|       |      |        |      |       |      |
|-------|------|--------|------|-------|------|
| B (m) | 7.22 | E (dd) | 6.26 | J (d) | 0.82 |
| A (m) | 7.31 | C (d)  | 6.84 | F (s) | 3.80 |
|       |      | D (d)  | 6.36 | G (t) | 3.04 |
|       |      |        |      | H (m) | 2.05 |
|       |      |        |      | I (d) | 1.02 |

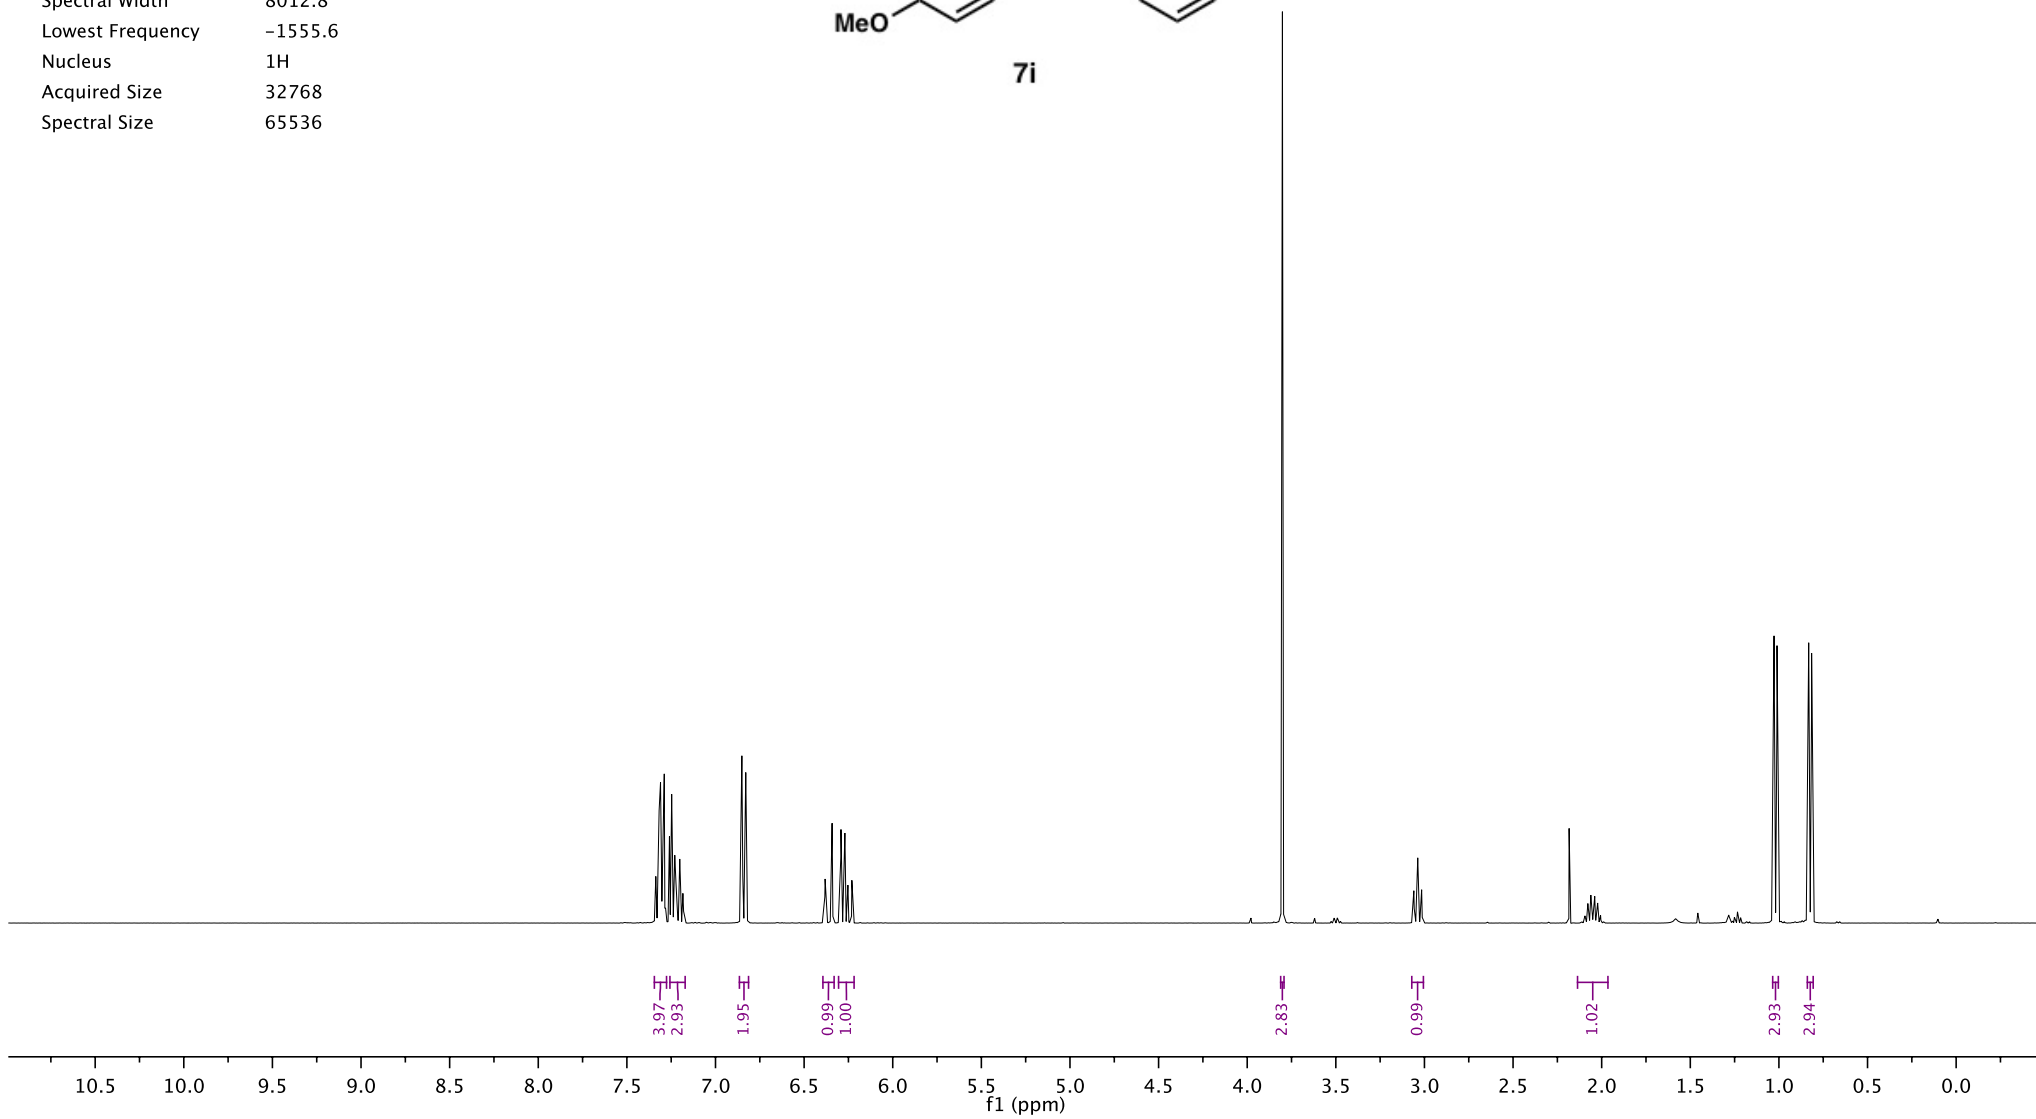



| Parameter              | Value               |
|------------------------|---------------------|
| Title                  | NAO-01-191-B.2.fid  |
| Origin                 | Bruker BioSpin GmbH |
| Solvent                | CDCl3               |
| Temperature            | 294.9               |
| Pulse Sequence         | zgpg30              |
| Number of Scans        | 128                 |
| Receiver Gain          | 78.7                |
| Relaxation Delay       | 2.0000              |
| Pulse Width            | 10.0000             |
| Acquisition Time       | 1.3631              |
| Acquisition Date       | 2016-08-20T03:15:42 |
| Spectrometer Frequency | 100.62              |
| Spectral Width         | 24038.5             |
| Lowest Frequency       | -1939.3             |
| Nucleus                | 13C                 |
| Acquired Size          | 32768               |
| Spectral Size          | 65536               |

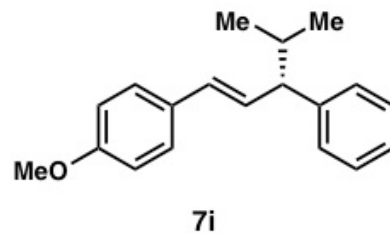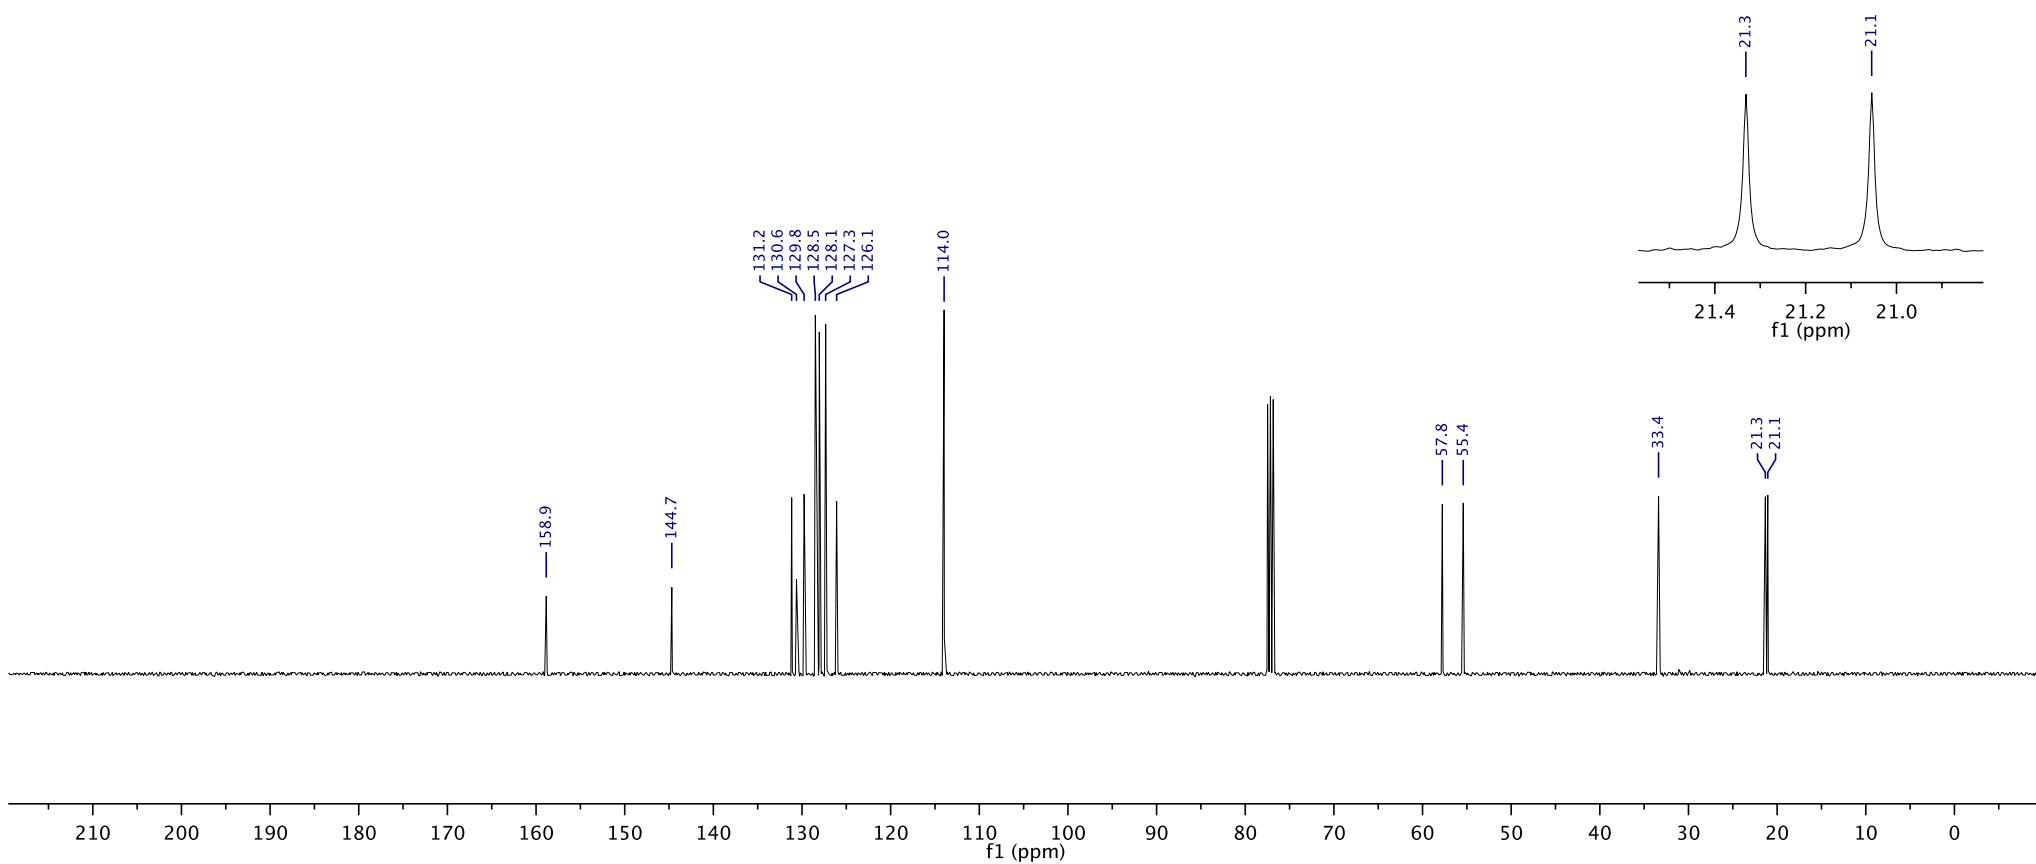

| Parameter              | Value               |
|------------------------|---------------------|
| Title                  | NAO-01-208-B.1.fid  |
| Origin                 | Bruker BioSpin GmbH |
| Solvent                | CDCl3               |
| Temperature            | 294.9               |
| Pulse Sequence         | zg30                |
| Number of Scans        | 16                  |
| Receiver Gain          | 30.3                |
| Relaxation Delay       | 1.0000              |
| Pulse Width            | 11.7000             |
| Acquisition Time       | 4.0894              |
| Acquisition Date       | 2016-08-20T05:03:47 |
| Spectrometer Frequency | 400.13              |
| Spectral Width         | 8012.8              |
| Lowest Frequency       | -1535.6             |
| Nucleus                | <sup>1</sup> H      |
| Acquired Size          | 32768               |
| Spectral Size          | 65536               |

S206

|       |      |        |      |       |      |       |      |
|-------|------|--------|------|-------|------|-------|------|
| B (m) | 7.26 | E (dd) | 6.34 | G (s) | 3.83 | K (s) | 0.01 |
| A (m) | 7.34 | C (d)  | 6.87 | H (m) | 3.67 | J (s) | 0.02 |
| D (d) | 6.44 | F (m)  | 3.93 | D (s) | 0.89 |       |      |

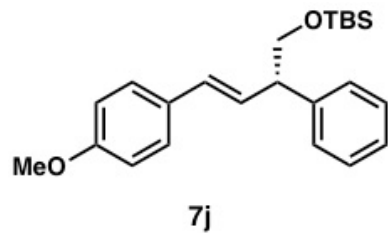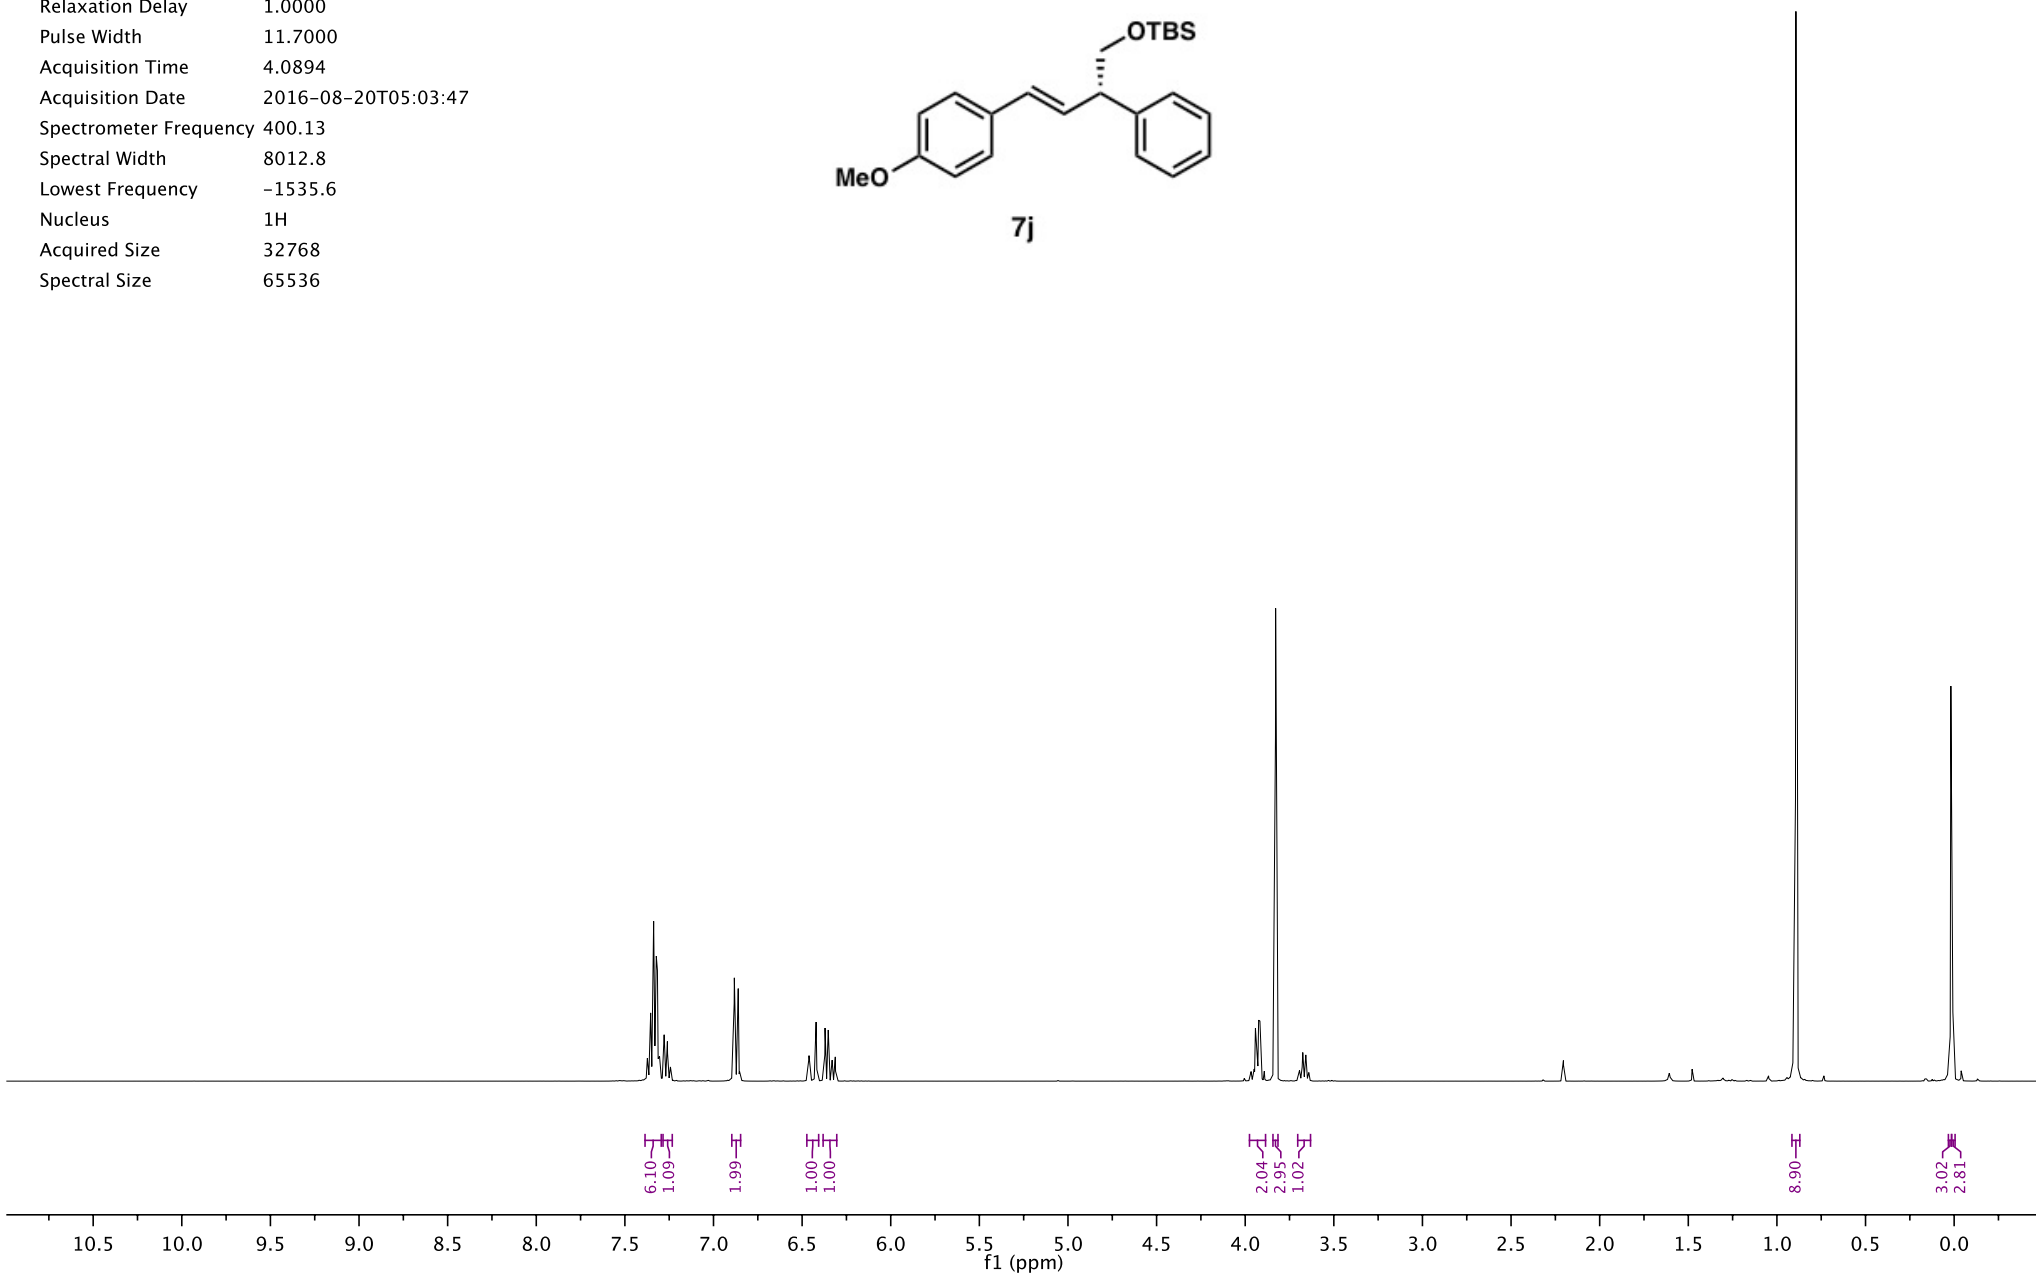

| Parameter              | Value               |
|------------------------|---------------------|
| Title                  | NAO-01-208-B.2.fid  |
| Origin                 | Bruker BioSpin GmbH |
| Solvent                | CDCl3               |
| Temperature            | 295.0               |
| Pulse Sequence         | zgpg30              |
| Number of Scans        | 128                 |
| Receiver Gain          | 78.7                |
| Relaxation Delay       | 2.0000              |
| Pulse Width            | 10.0000             |
| Acquisition Time       | 1.3631              |
| Acquisition Date       | 2016-08-20T05:11:44 |
| Spectrometer Frequency | 100.62              |
| Spectral Width         | 24038.5             |
| Lowest Frequency       | -1939.5             |
| Nucleus                | 13C                 |
| Acquired Size          | 32768               |
| Spectral Size          | 65536               |

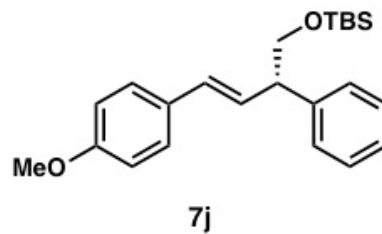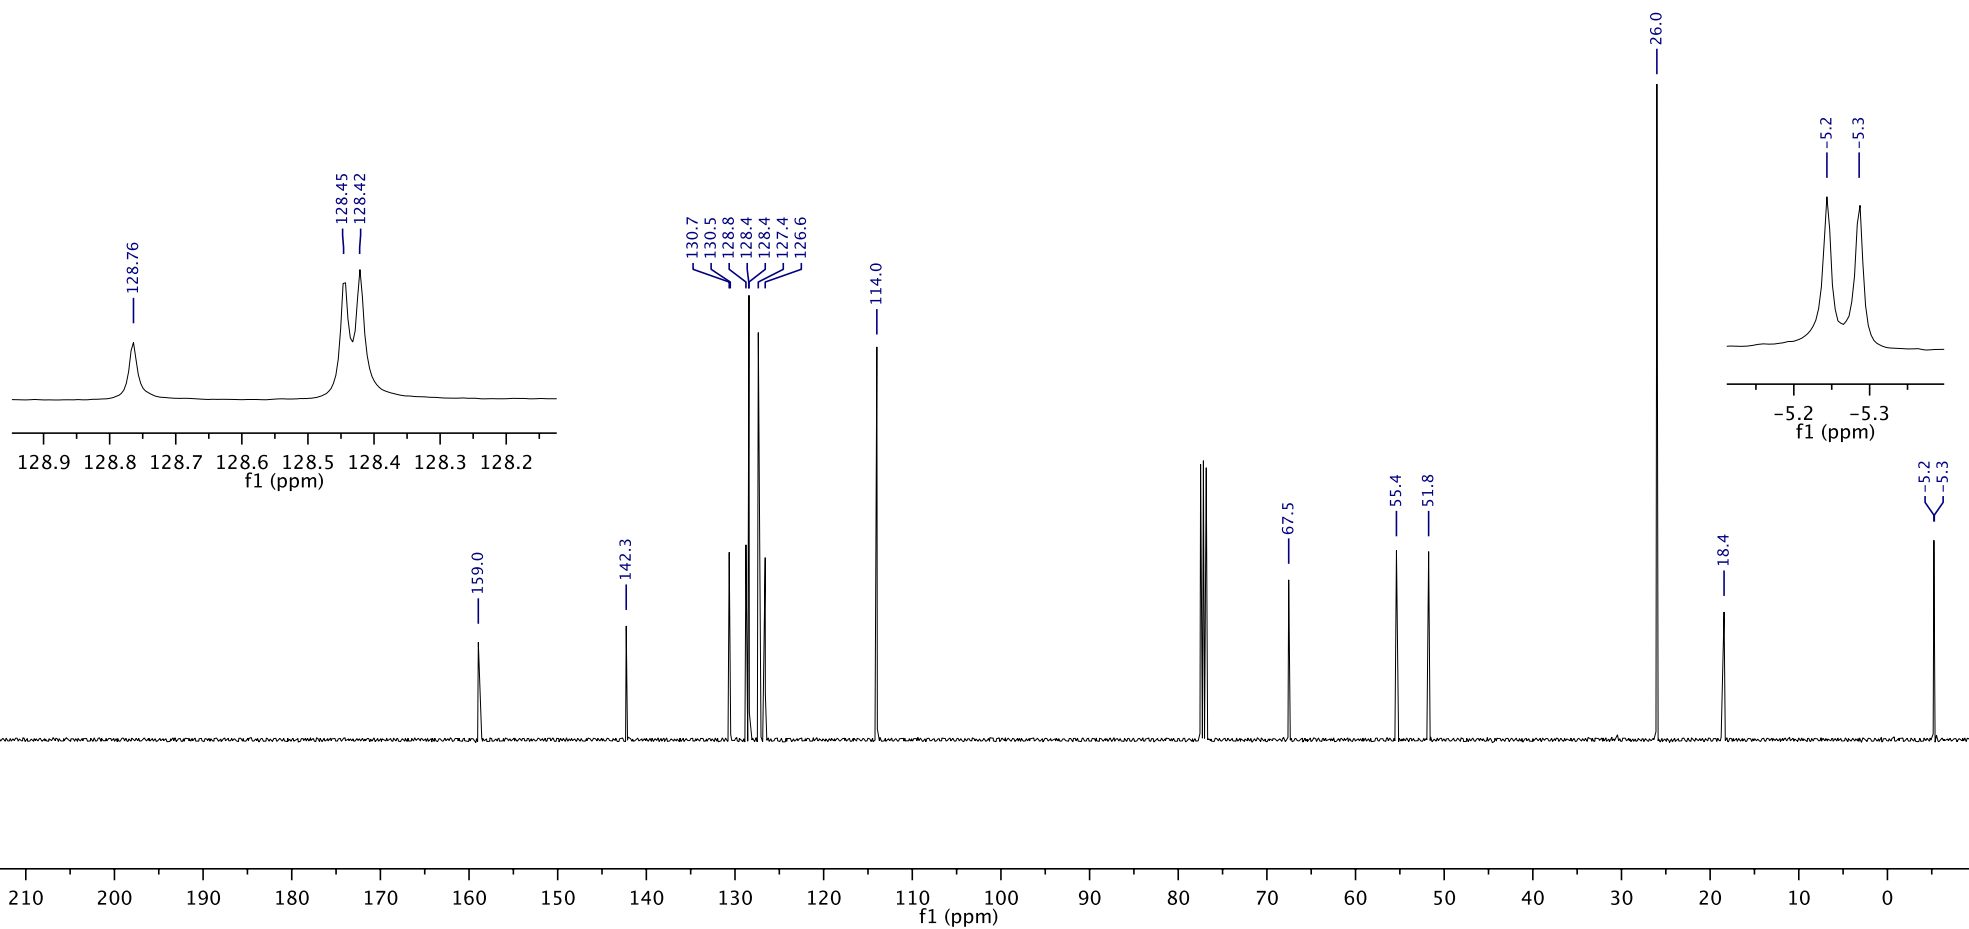

| Parameter              | Value               |
|------------------------|---------------------|
| Title                  | NAO-01-212-B.2.fid  |
| Origin                 | Bruker BioSpin GmbH |
| Solvent                | CDCl3               |
| Temperature            | 294.9               |
| Pulse Sequence         | zg30                |
| Number of Scans        | 16                  |
| Receiver Gain          | 30.3                |
| Relaxation Delay       | 1.0000              |
| Pulse Width            | 11.7000             |
| Acquisition Time       | 4.0894              |
| Acquisition Date       | 2016-08-20T02:09:03 |
| Spectrometer Frequency | 400.13              |
| Spectral Width         | 8012.8              |
| Lowest Frequency       | -1584.4             |
| Nucleus                | <sup>1</sup> H      |
| Acquired Size          | 32768               |
| Spectral Size          | 65536               |

|       |      |       |      |        |      |         |      |         |      |         |      |       |      |       |      |       |      |
|-------|------|-------|------|--------|------|---------|------|---------|------|---------|------|-------|------|-------|------|-------|------|
| A (m) | 7.22 | B (d) | 6.78 | D (dd) | 6.18 | E (ddt) | 5.73 | F (ddt) | 5.01 | G (ddt) | 4.95 | H (s) | 3.74 | I (m) | 3.46 | J (m) | 2.54 |
|-------|------|-------|------|--------|------|---------|------|---------|------|---------|------|-------|------|-------|------|-------|------|

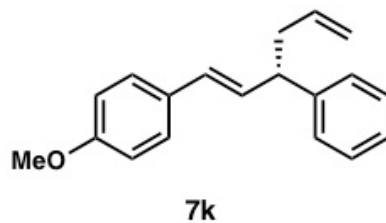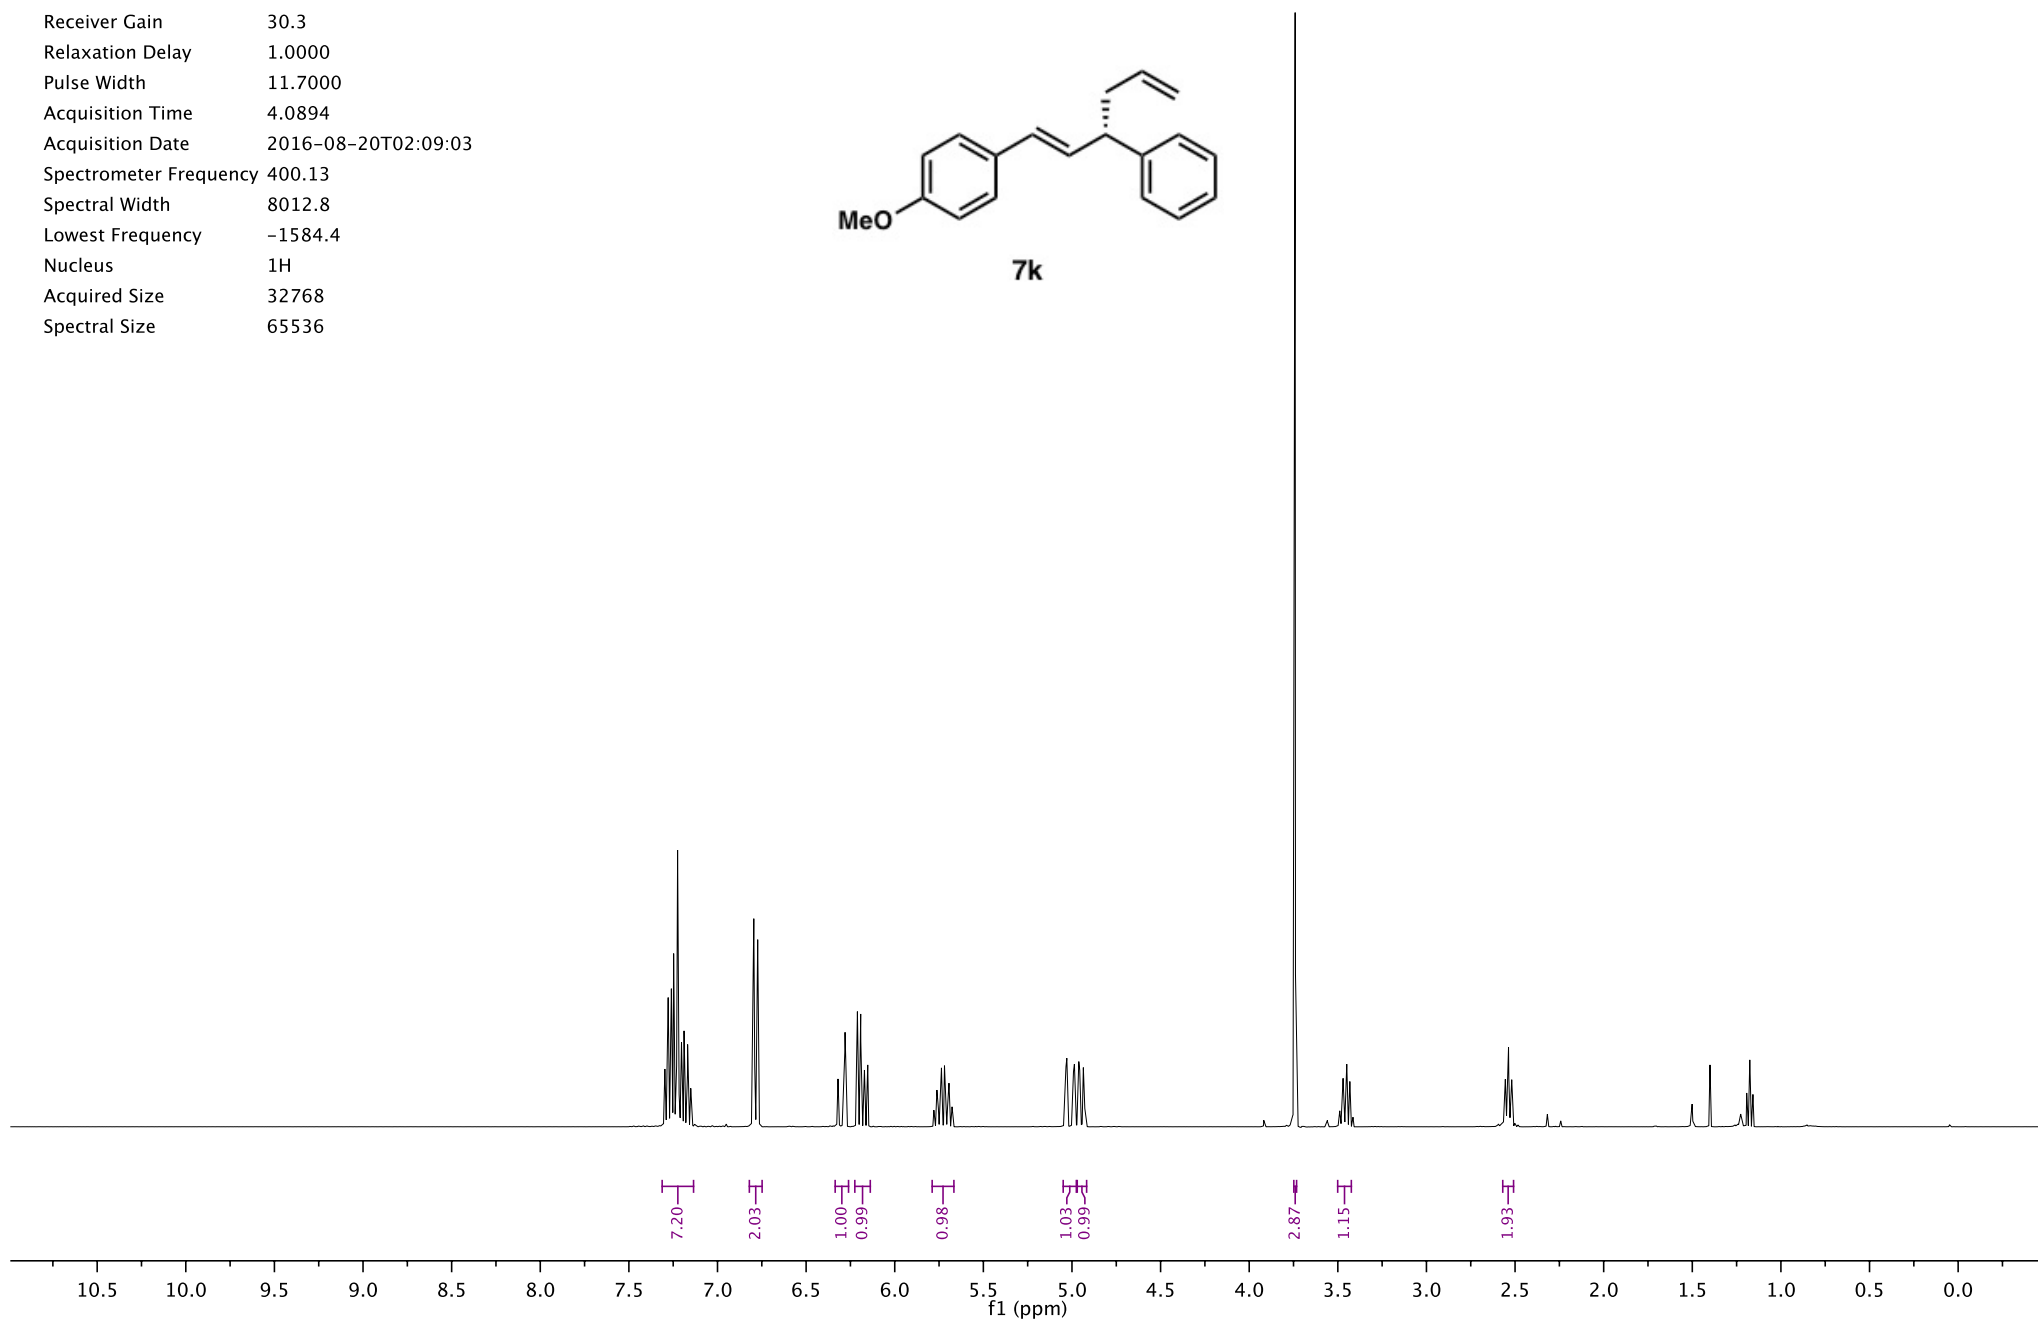

| Parameter              | Value               |
|------------------------|---------------------|
| Title                  | NAO-01-212-B.3.fid  |
| Origin                 | Bruker BioSpin GmbH |
| Solvent                | CDCl3               |
| Temperature            | 294.9               |
| Pulse Sequence         | zgpg30              |
| Number of Scans        | 128                 |
| Receiver Gain          | 72.0                |
| Relaxation Delay       | 2.0000              |
| Pulse Width            | 10.0000             |
| Acquisition Time       | 1.3631              |
| Acquisition Date       | 2016-08-20T02:17:00 |
| Spectrometer Frequency | 100.62              |
| Spectral Width         | 24038.5             |
| Lowest Frequency       | -1943.9             |
| Nucleus                | <sup>13</sup> C     |
| Acquired Size          | 32768               |
| Spectral Size          | 65536               |

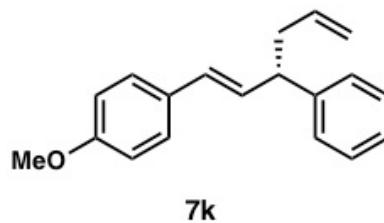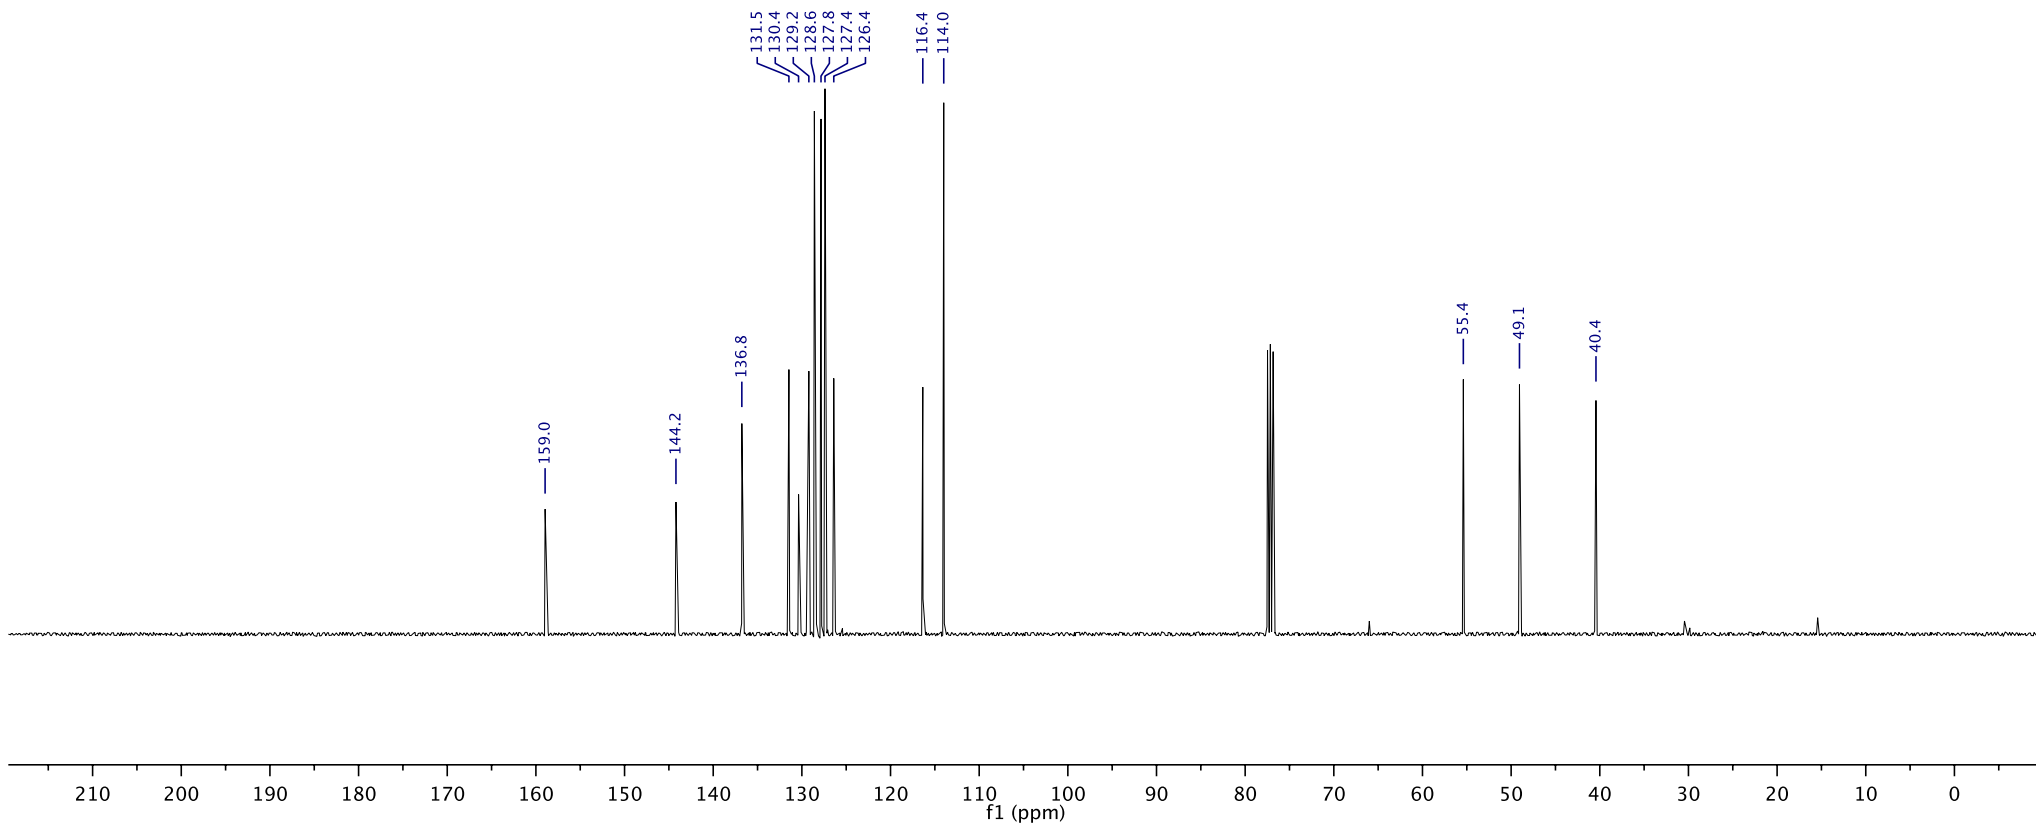

| Parameter              | Value               |
|------------------------|---------------------|
| Title                  | KEP-2-271A.1.fid    |
| Origin                 | Bruker BioSpin GmbH |
| Solvent                | CDCl3               |
| Temperature            | 294.9               |
| Pulse Sequence         | zg30                |
| Number of Scans        | 16                  |
| Receiver Gain          | 30.3                |
| Relaxation Delay       | 1.0000              |
| Pulse Width            | 11.7000             |
| Acquisition Time       | 4.0894              |
| Acquisition Date       | 2016-09-10T13:42:10 |
| Spectrometer Frequency | 400.13              |
| Spectral Width         | 8012.8              |
| Lowest Frequency       | -1555.6             |
| Nucleus                | 1H                  |
| Acquired Size          | 32768               |
| Spectral Size          | 65536               |

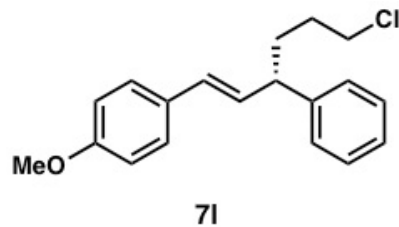

|       |       |       |        |       |       |       |       |       |
|-------|-------|-------|--------|-------|-------|-------|-------|-------|
| A (m) | B (d) | C (d) | D (dd) | E (s) | F (t) | G (m) | H (m) | I (m) |
| 7.31  | 6.85  | 6.38  | 6.20   | 3.81  | 3.56  | 3.43  | 1.98  | 1.81  |

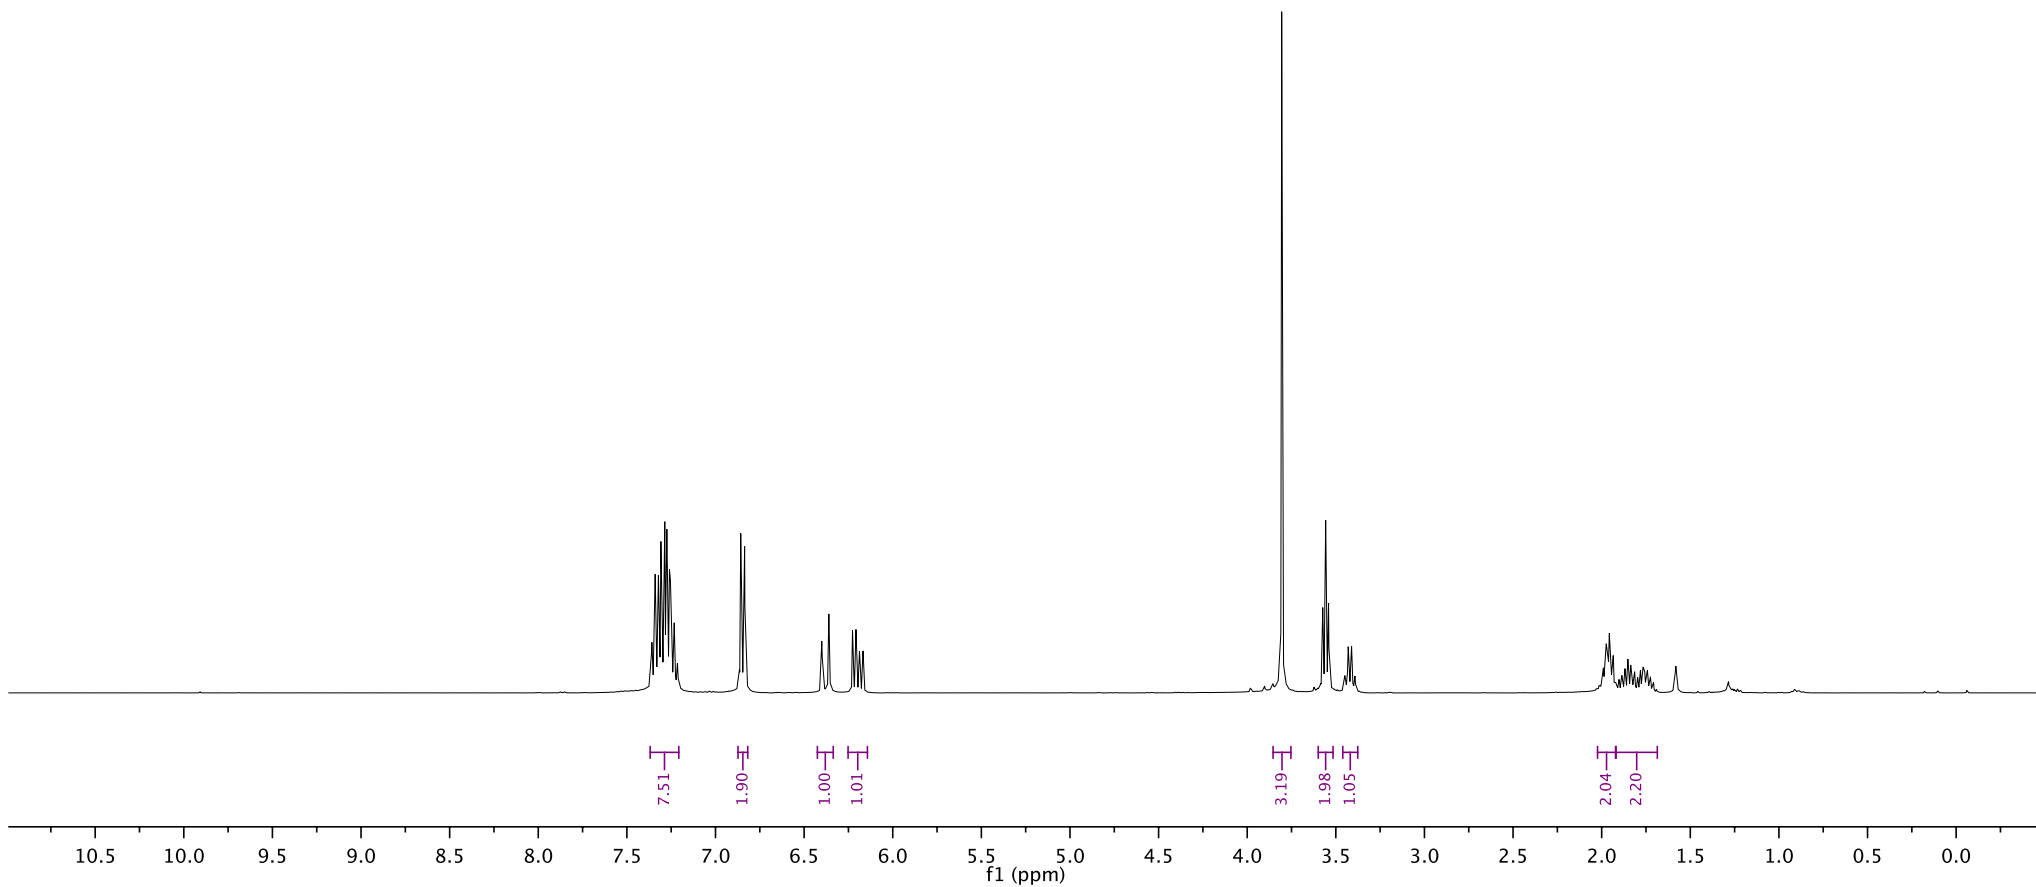

| Parameter              | Value               |
|------------------------|---------------------|
| Title                  | KEP-2-271A.2.fid    |
| Origin                 | Bruker BioSpin GmbH |
| Solvent                | CDCl3               |
| Temperature            | 294.9               |
| Pulse Sequence         | zgpg30              |
| Number of Scans        | 128                 |
| Receiver Gain          | 64.2                |
| Relaxation Delay       | 2.0000              |
| Pulse Width            | 10.0000             |
| Acquisition Time       | 1.3631              |
| Acquisition Date       | 2016-09-10T13:50:00 |
| Spectrometer Frequency | 100.62              |
| Spectral Width         | 24038.5             |
| Lowest Frequency       | -1942.1             |
| Nucleus                | 13C                 |
| Acquired Size          | 32768               |
| Spectral Size          | 65536               |

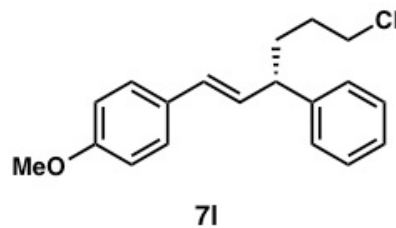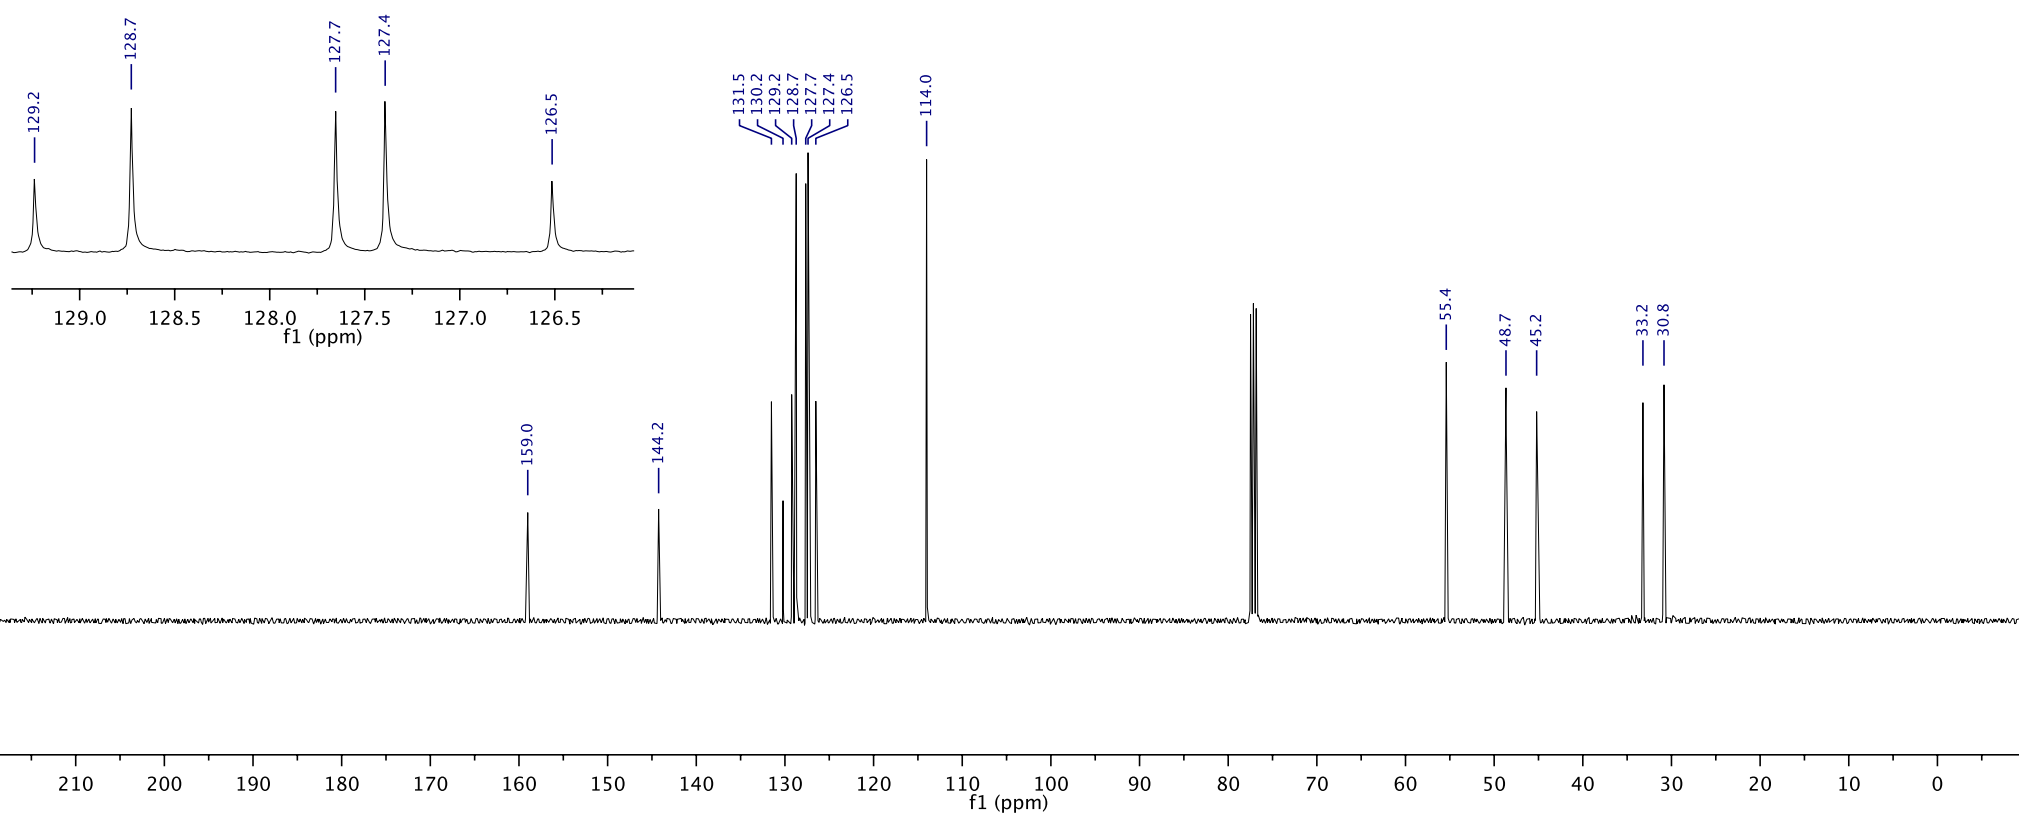

| Parameter              | Value                  |
|------------------------|------------------------|
| Title                  | JLH-5-169-column.1.fid |
| Origin                 | Bruker BioSpin GmbH    |
| Solvent                | CDCl3                  |
| Temperature            | 294.9                  |
| Pulse Sequence         | zg30                   |
| Number of Scans        | 16                     |
| Receiver Gain          | 30.3                   |
| Relaxation Delay       | 1.0000                 |
| Pulse Width            | 11.7000                |
| Acquisition Time       | 4.0894                 |
| Acquisition Date       | 2016-09-04T12:53:46    |
| Spectrometer Frequency | 400.13                 |
| Spectral Width         | 8012.8                 |
| Lowest Frequency       | -1555.6                |
| Nucleus                | 1H                     |
| Acquired Size          | 32768                  |
| Spectral Size          | 65536                  |

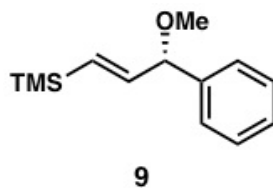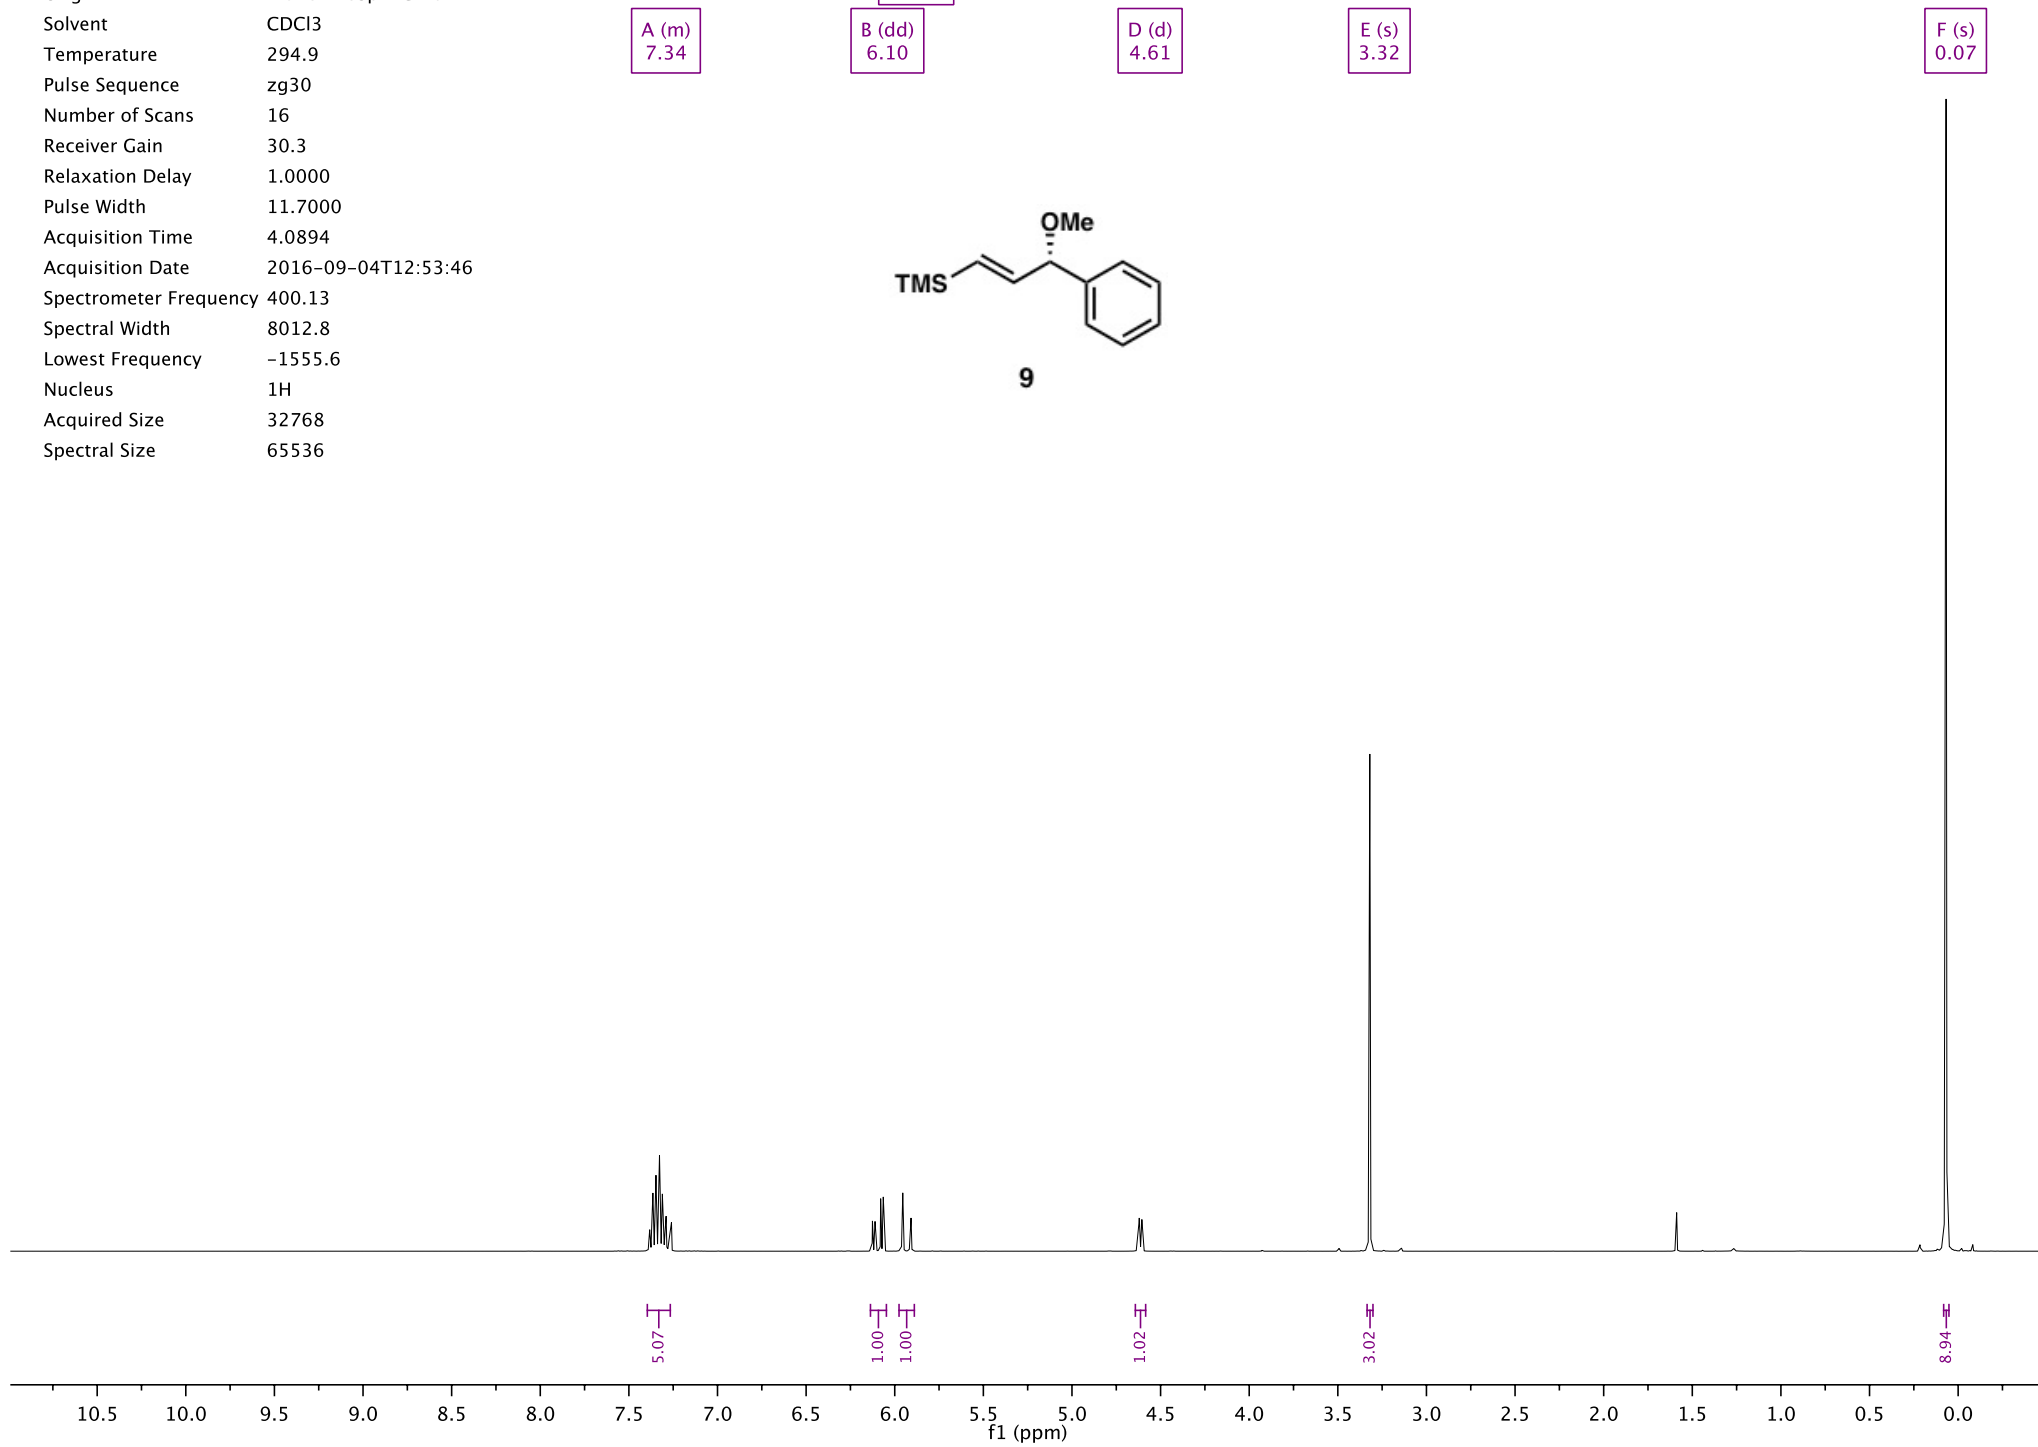



| Parameter              | Value                  |
|------------------------|------------------------|
| Title                  | JLH-5-169-column.2.fid |
| Origin                 | Bruker BioSpin GmbH    |
| Solvent                | CDCl3                  |
| Temperature            | 295.0                  |
| Pulse Sequence         | zgpg30                 |
| Number of Scans        | 128                    |
| Receiver Gain          | 72.0                   |
| Relaxation Delay       | 2.0000                 |
| Pulse Width            | 10.0000                |
| Acquisition Time       | 1.3631                 |
| Acquisition Date       | 2016-09-04T13:01:36    |
| Spectrometer Frequency | 100.62                 |
| Spectral Width         | 24038.5                |
| Lowest Frequency       | -2067.1                |
| Nucleus                | <sup>13</sup> C        |
| Acquired Size          | 32768                  |
| Spectral Size          | 65536                  |

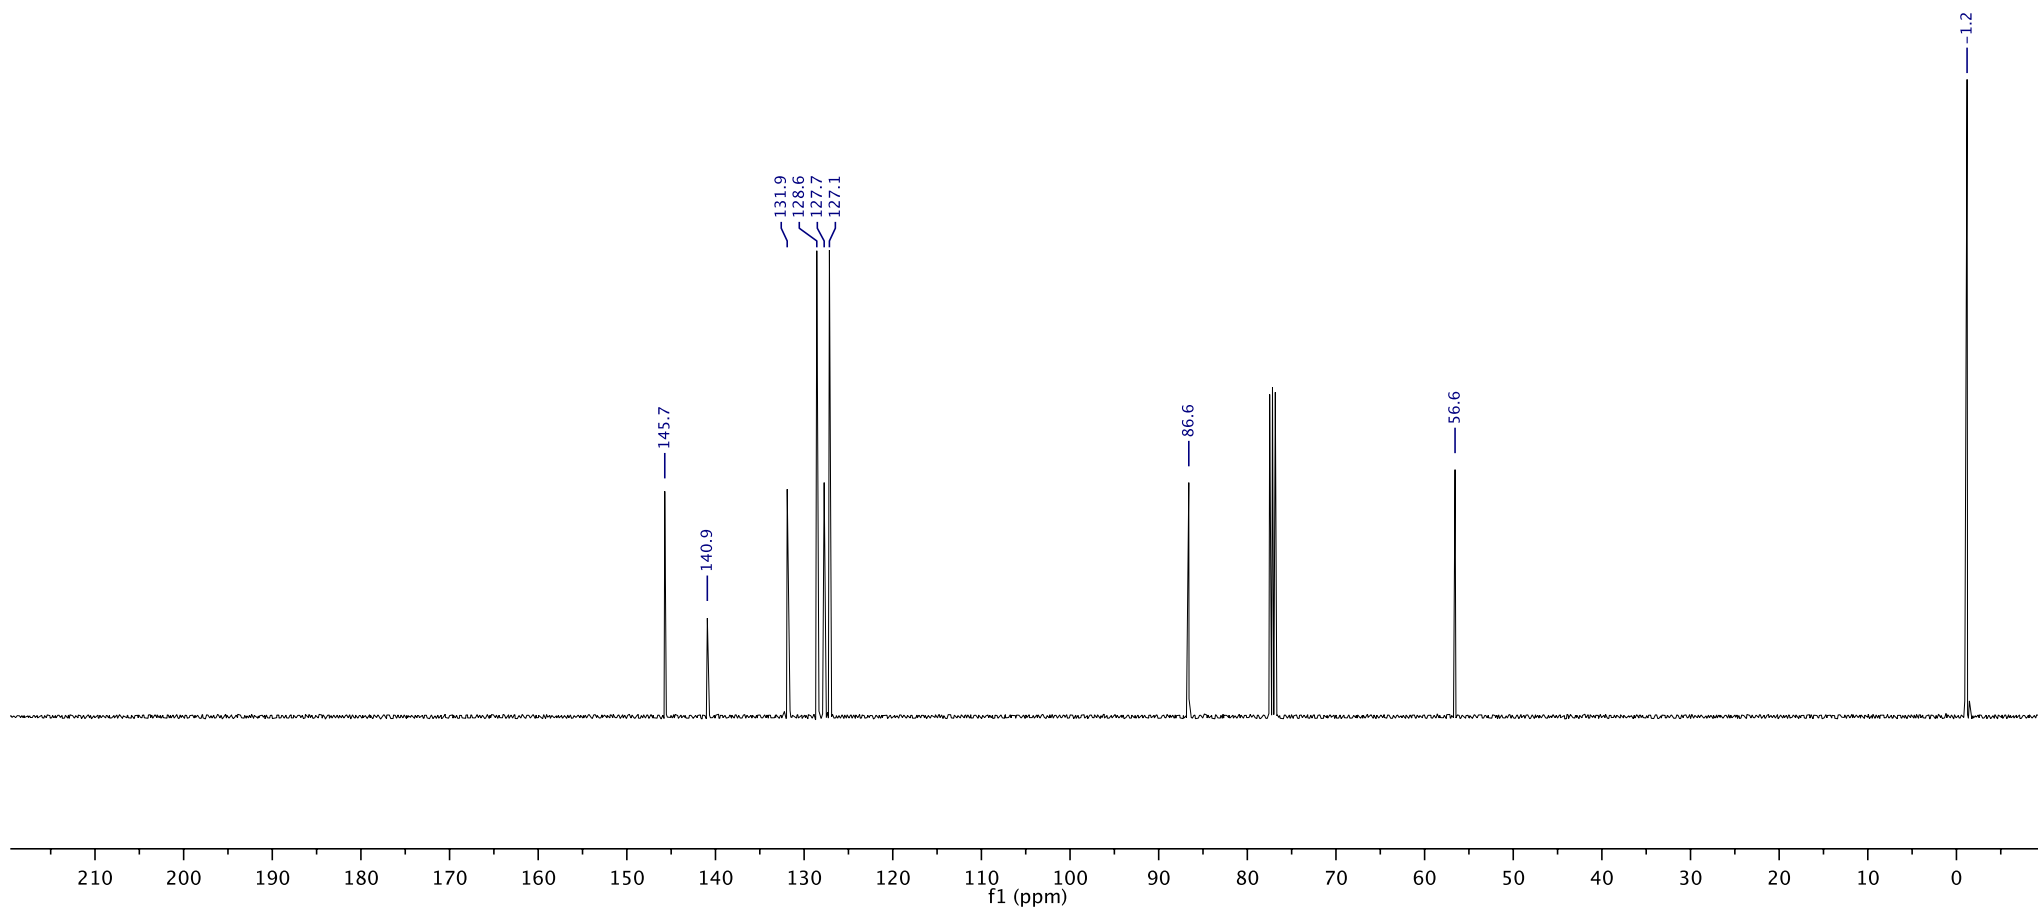

| Parameter              | Value                  |
|------------------------|------------------------|
| Title                  | NAO-01-266-20mol.1.fid |
| Origin                 | Bruker BioSpin GmbH    |
| Solvent                | CDCl3                  |
| Temperature            | 294.9                  |
| Pulse Sequence         | zg30                   |
| Number of Scans        | 16                     |
| Receiver Gain          | 64.2                   |
| Relaxation Delay       | 1.0000                 |
| Pulse Width            | 11.7000                |
| Acquisition Time       | 4.0894                 |
| Acquisition Date       | 2016-10-01T16:59:57    |
| Spectrometer Frequency | 400.13                 |
| Spectral Width         | 8012.8                 |
| Lowest Frequency       | -1535.6                |
| Nucleus                | <sup>1</sup> H         |
| Acquired Size          | 32768                  |
| Spectral Size          | 65536                  |

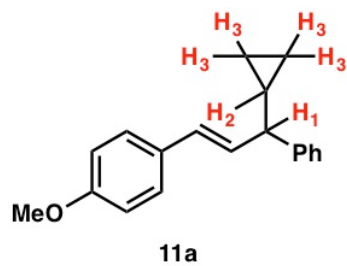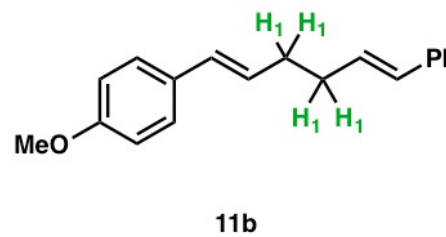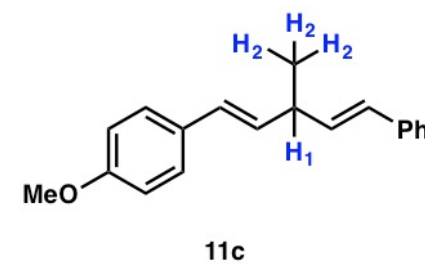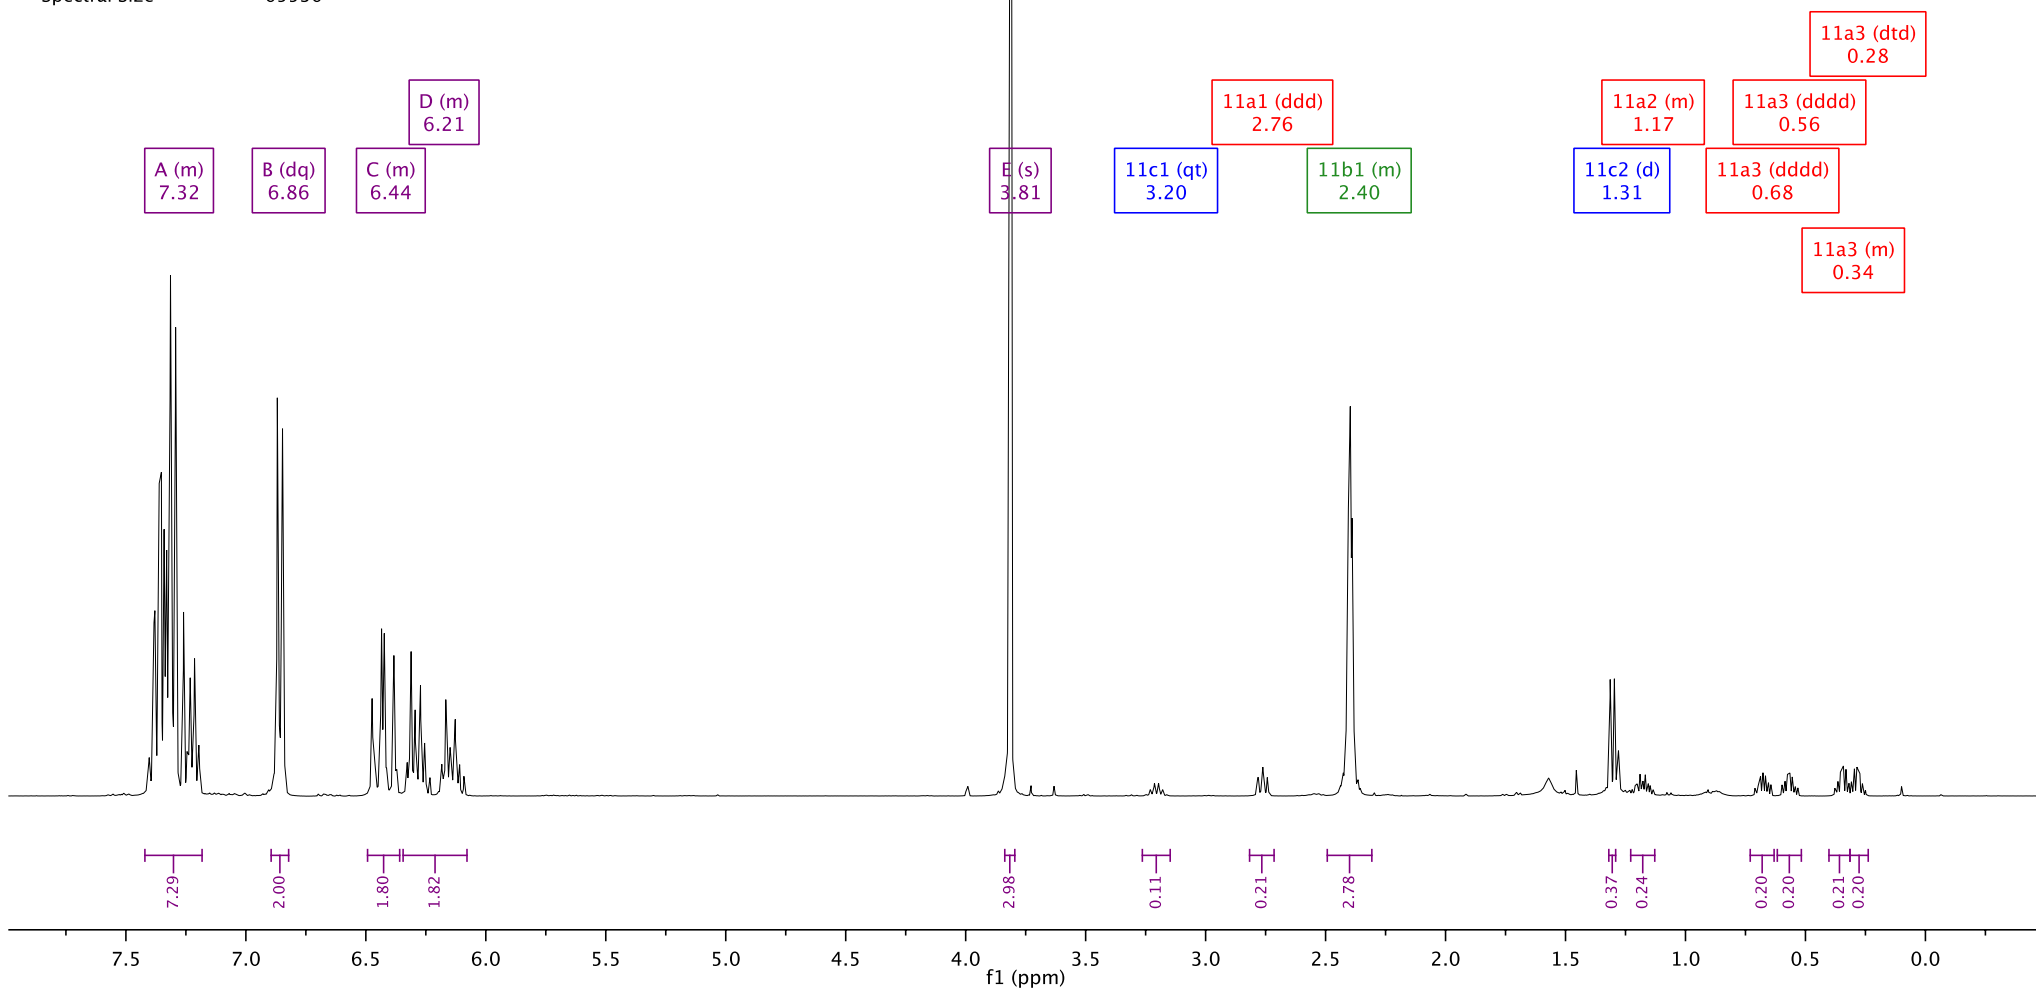

| Parameter              | Value                  |
|------------------------|------------------------|
| Title                  | NAO-01-266-20mol.2.fid |
| Origin                 | Bruker BioSpin GmbH    |
| Solvent                | CDCl3                  |
| Temperature            | 294.9                  |
| Pulse Sequence         | zgpg30                 |
| Number of Scans        | 128                    |
| Receiver Gain          | 72.0                   |
| Relaxation Delay       | 2.0000                 |
| Pulse Width            | 10.0000                |
| Acquisition Time       | 1.3631                 |
| Acquisition Date       | 2016-10-01T17:07:55    |
| Spectrometer Frequency | 100.62                 |
| Spectral Width         | 24038.5                |
| Lowest Frequency       | -1958.4                |
| Nucleus                | 13C                    |
| Acquired Size          | 32768                  |
| Spectral Size          | 65536                  |

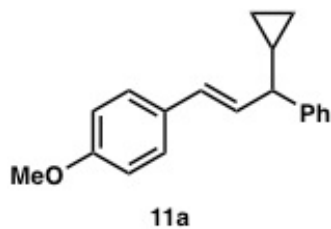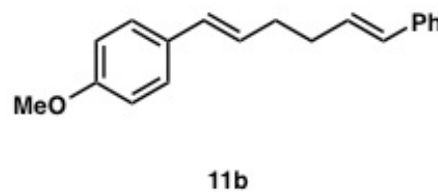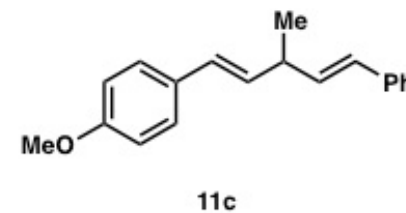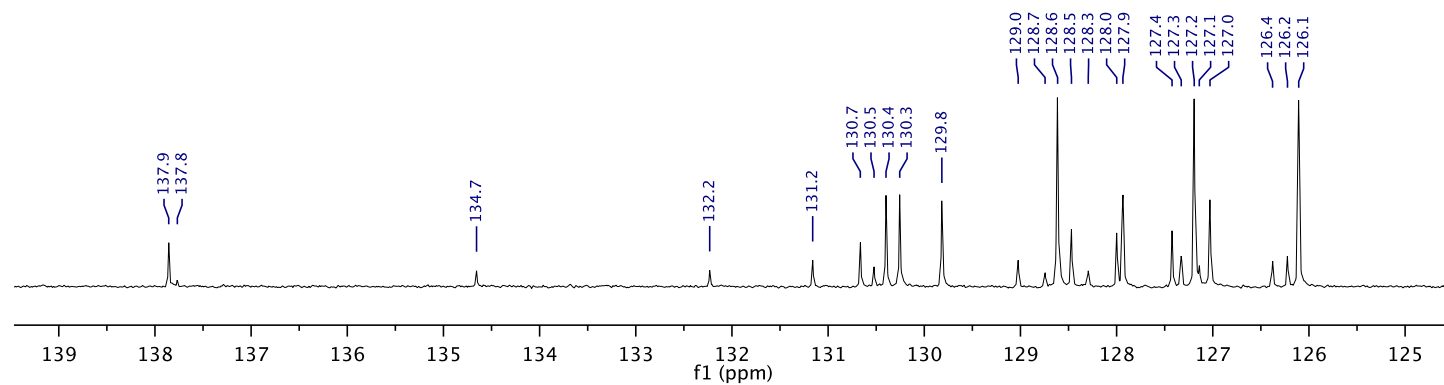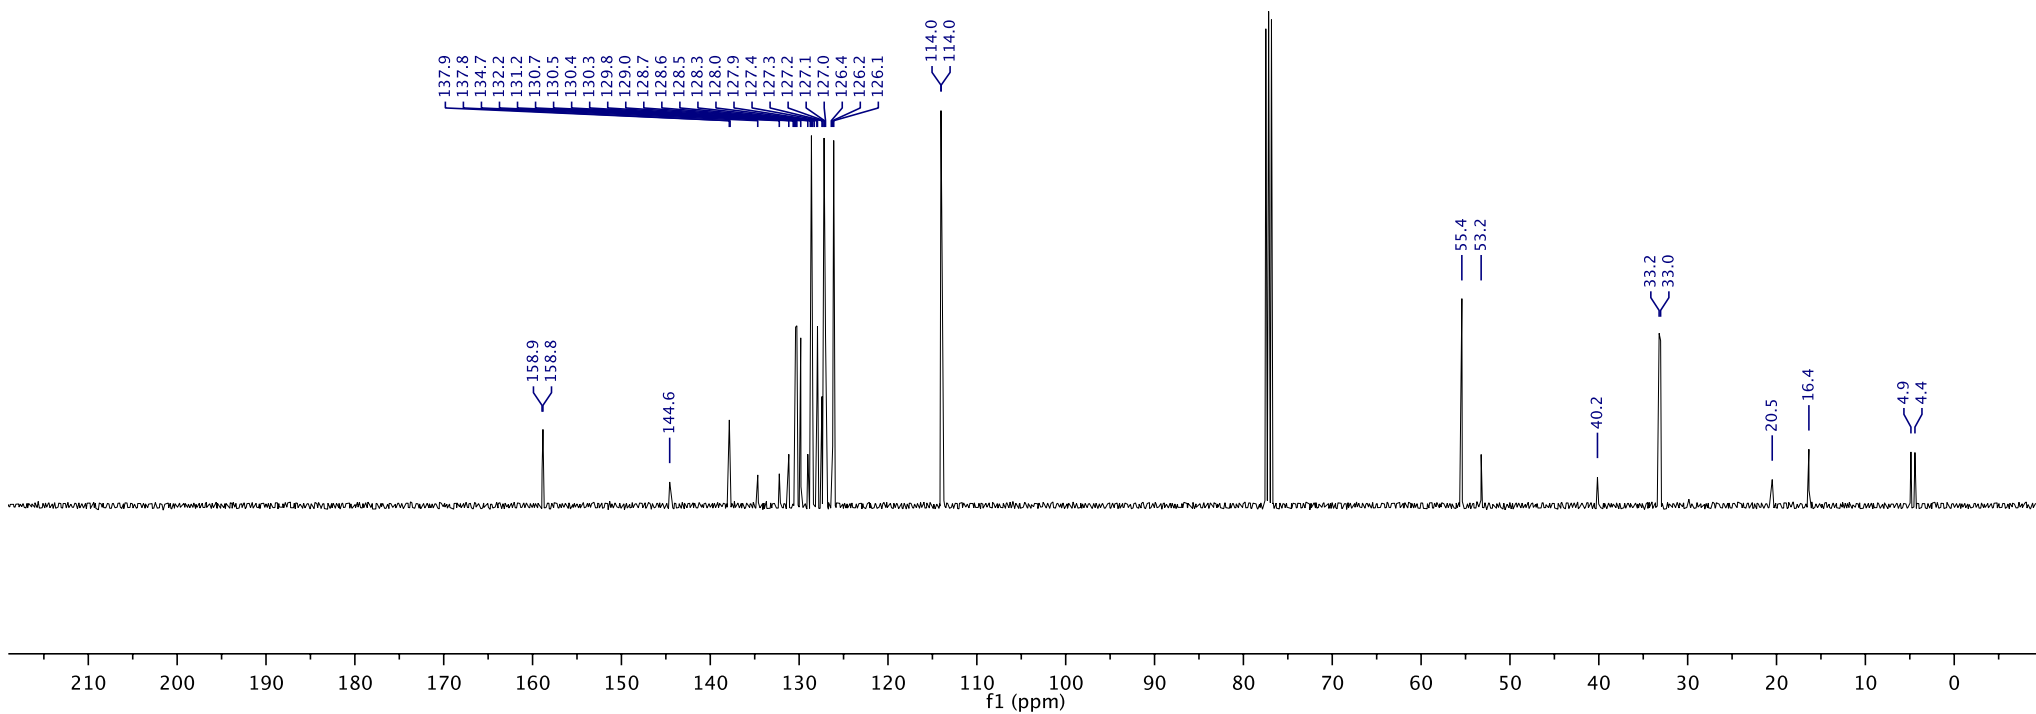

11a-c  
COSY

S216

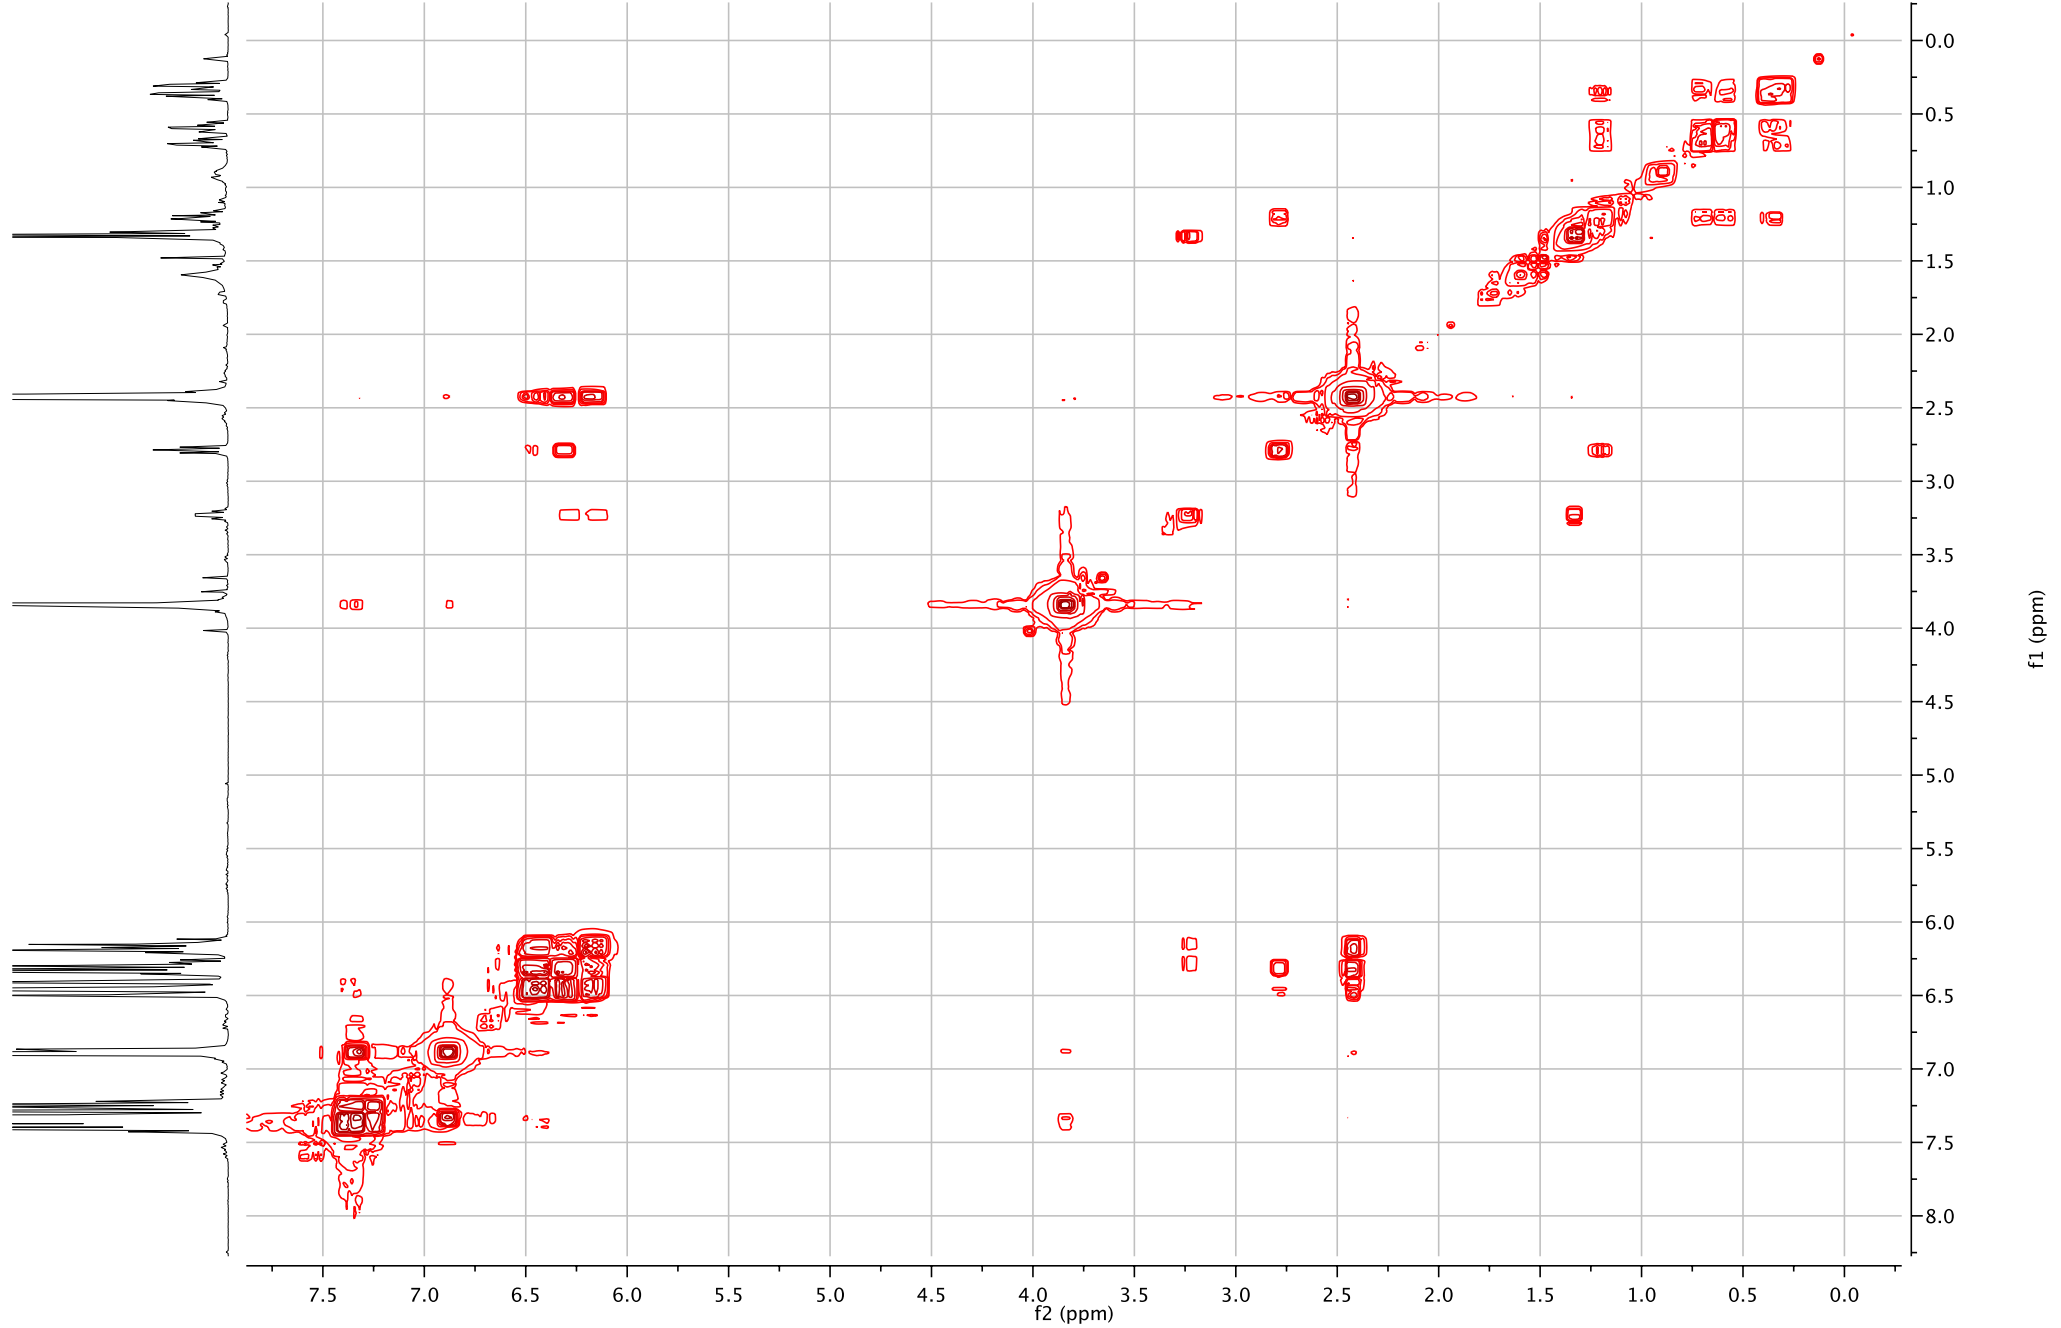

11a-c  
HSQC

S217

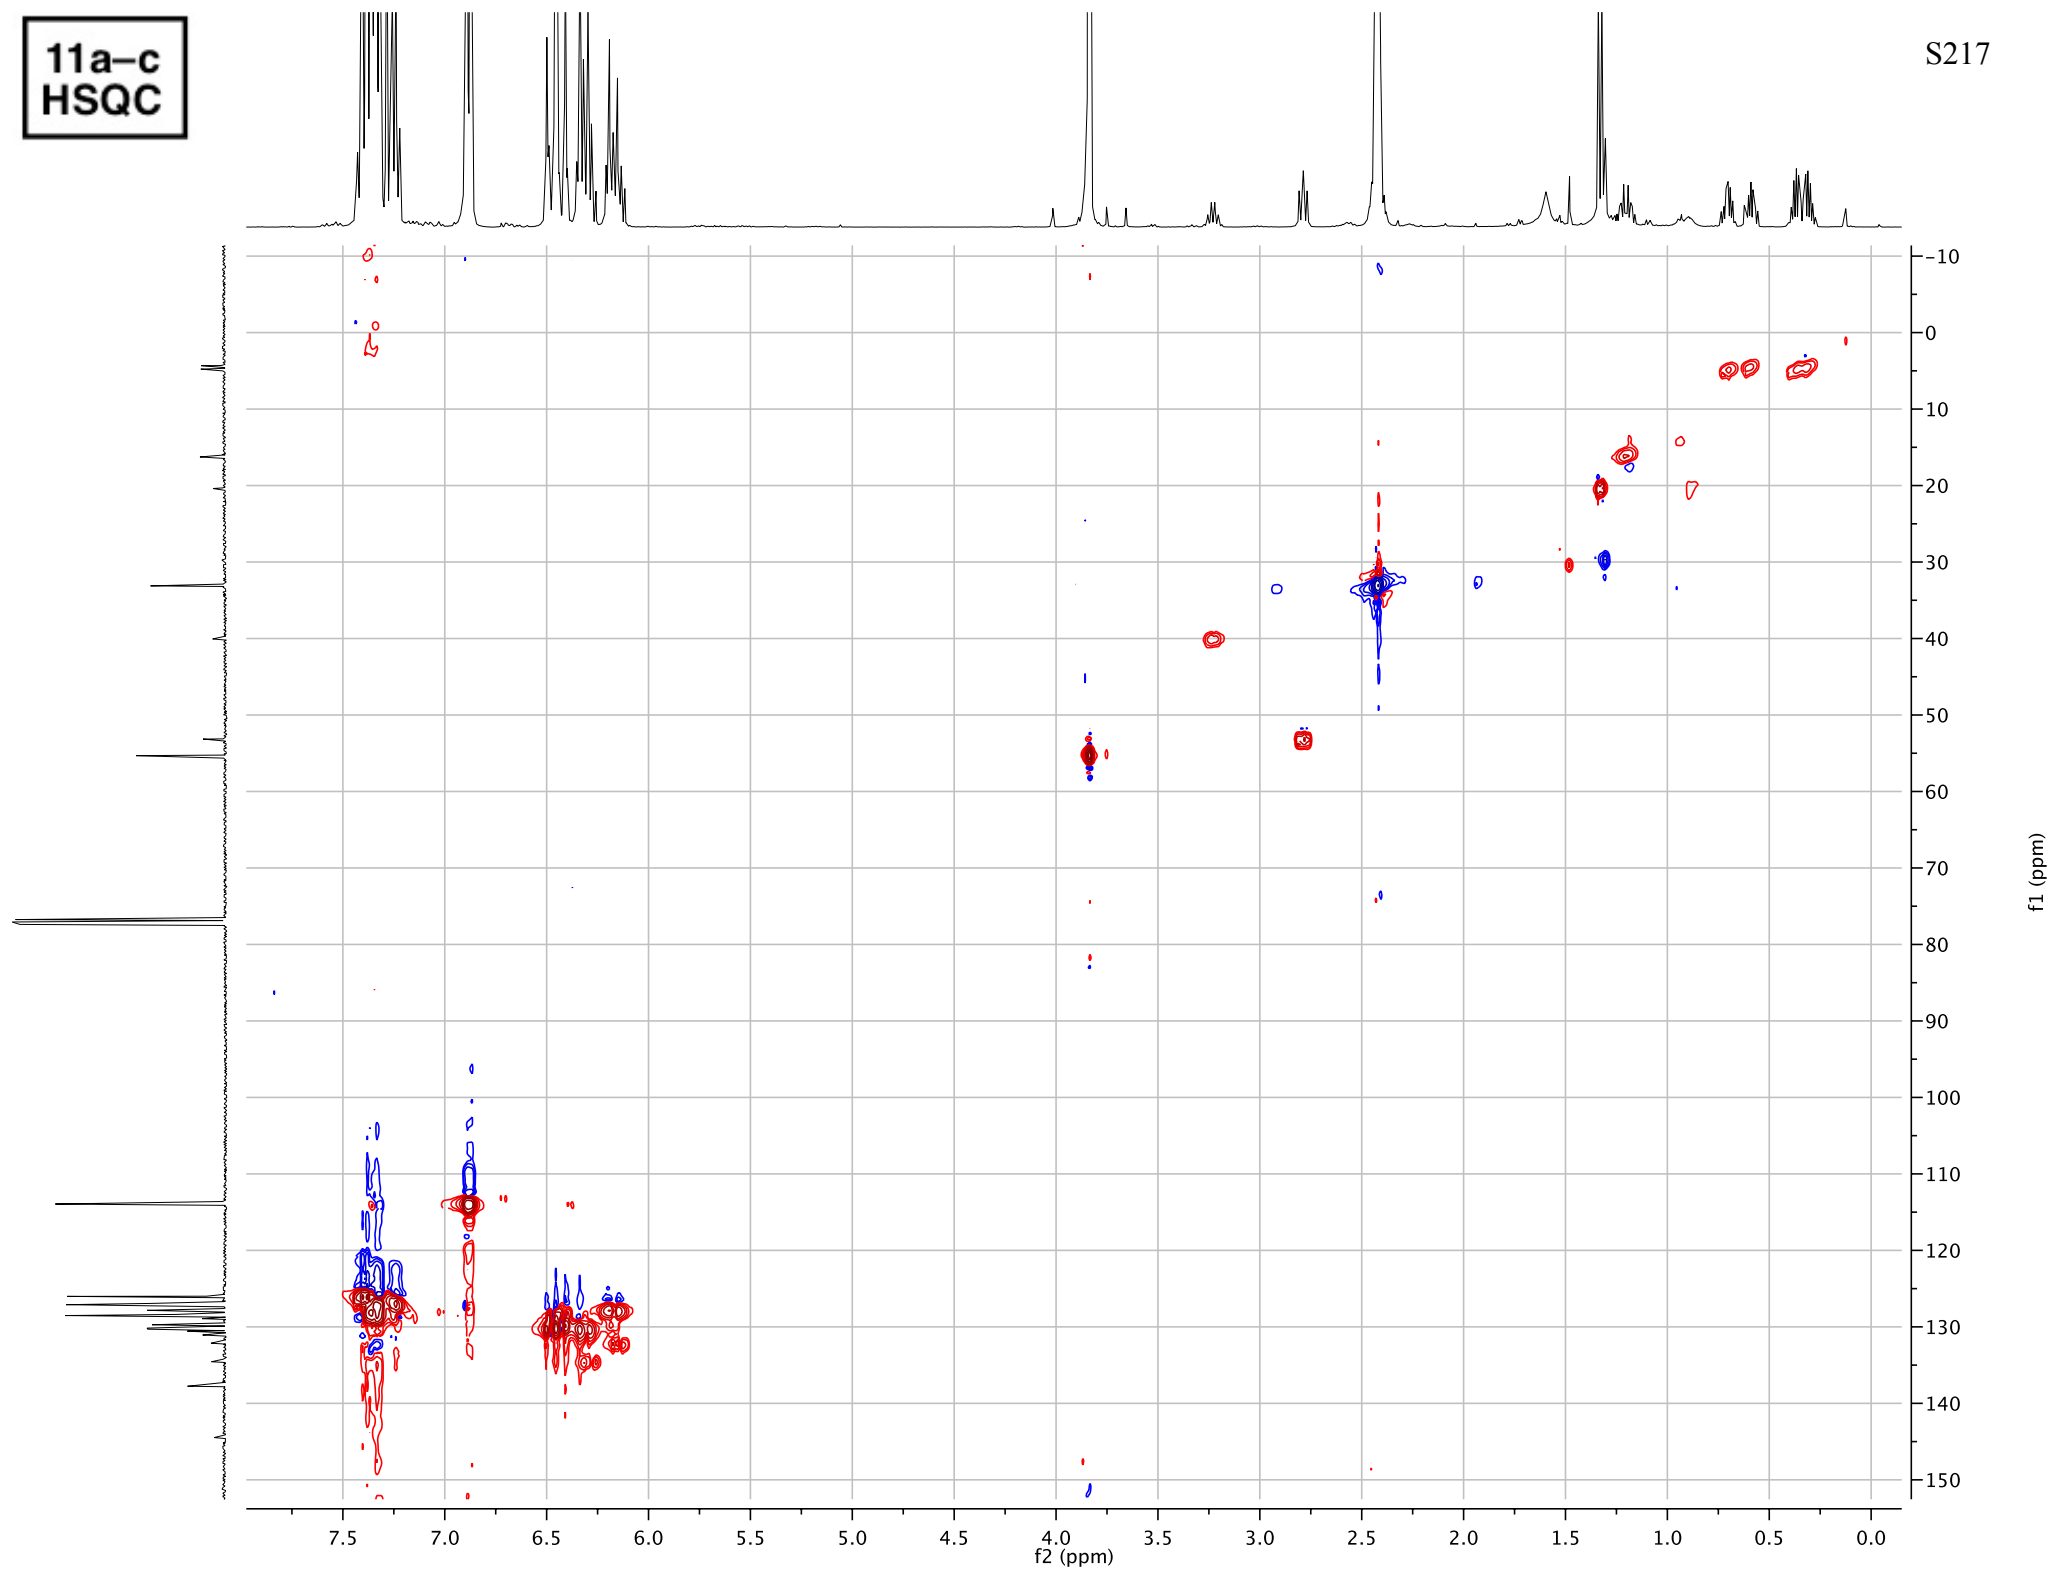

11a-c  
HMBC

S218

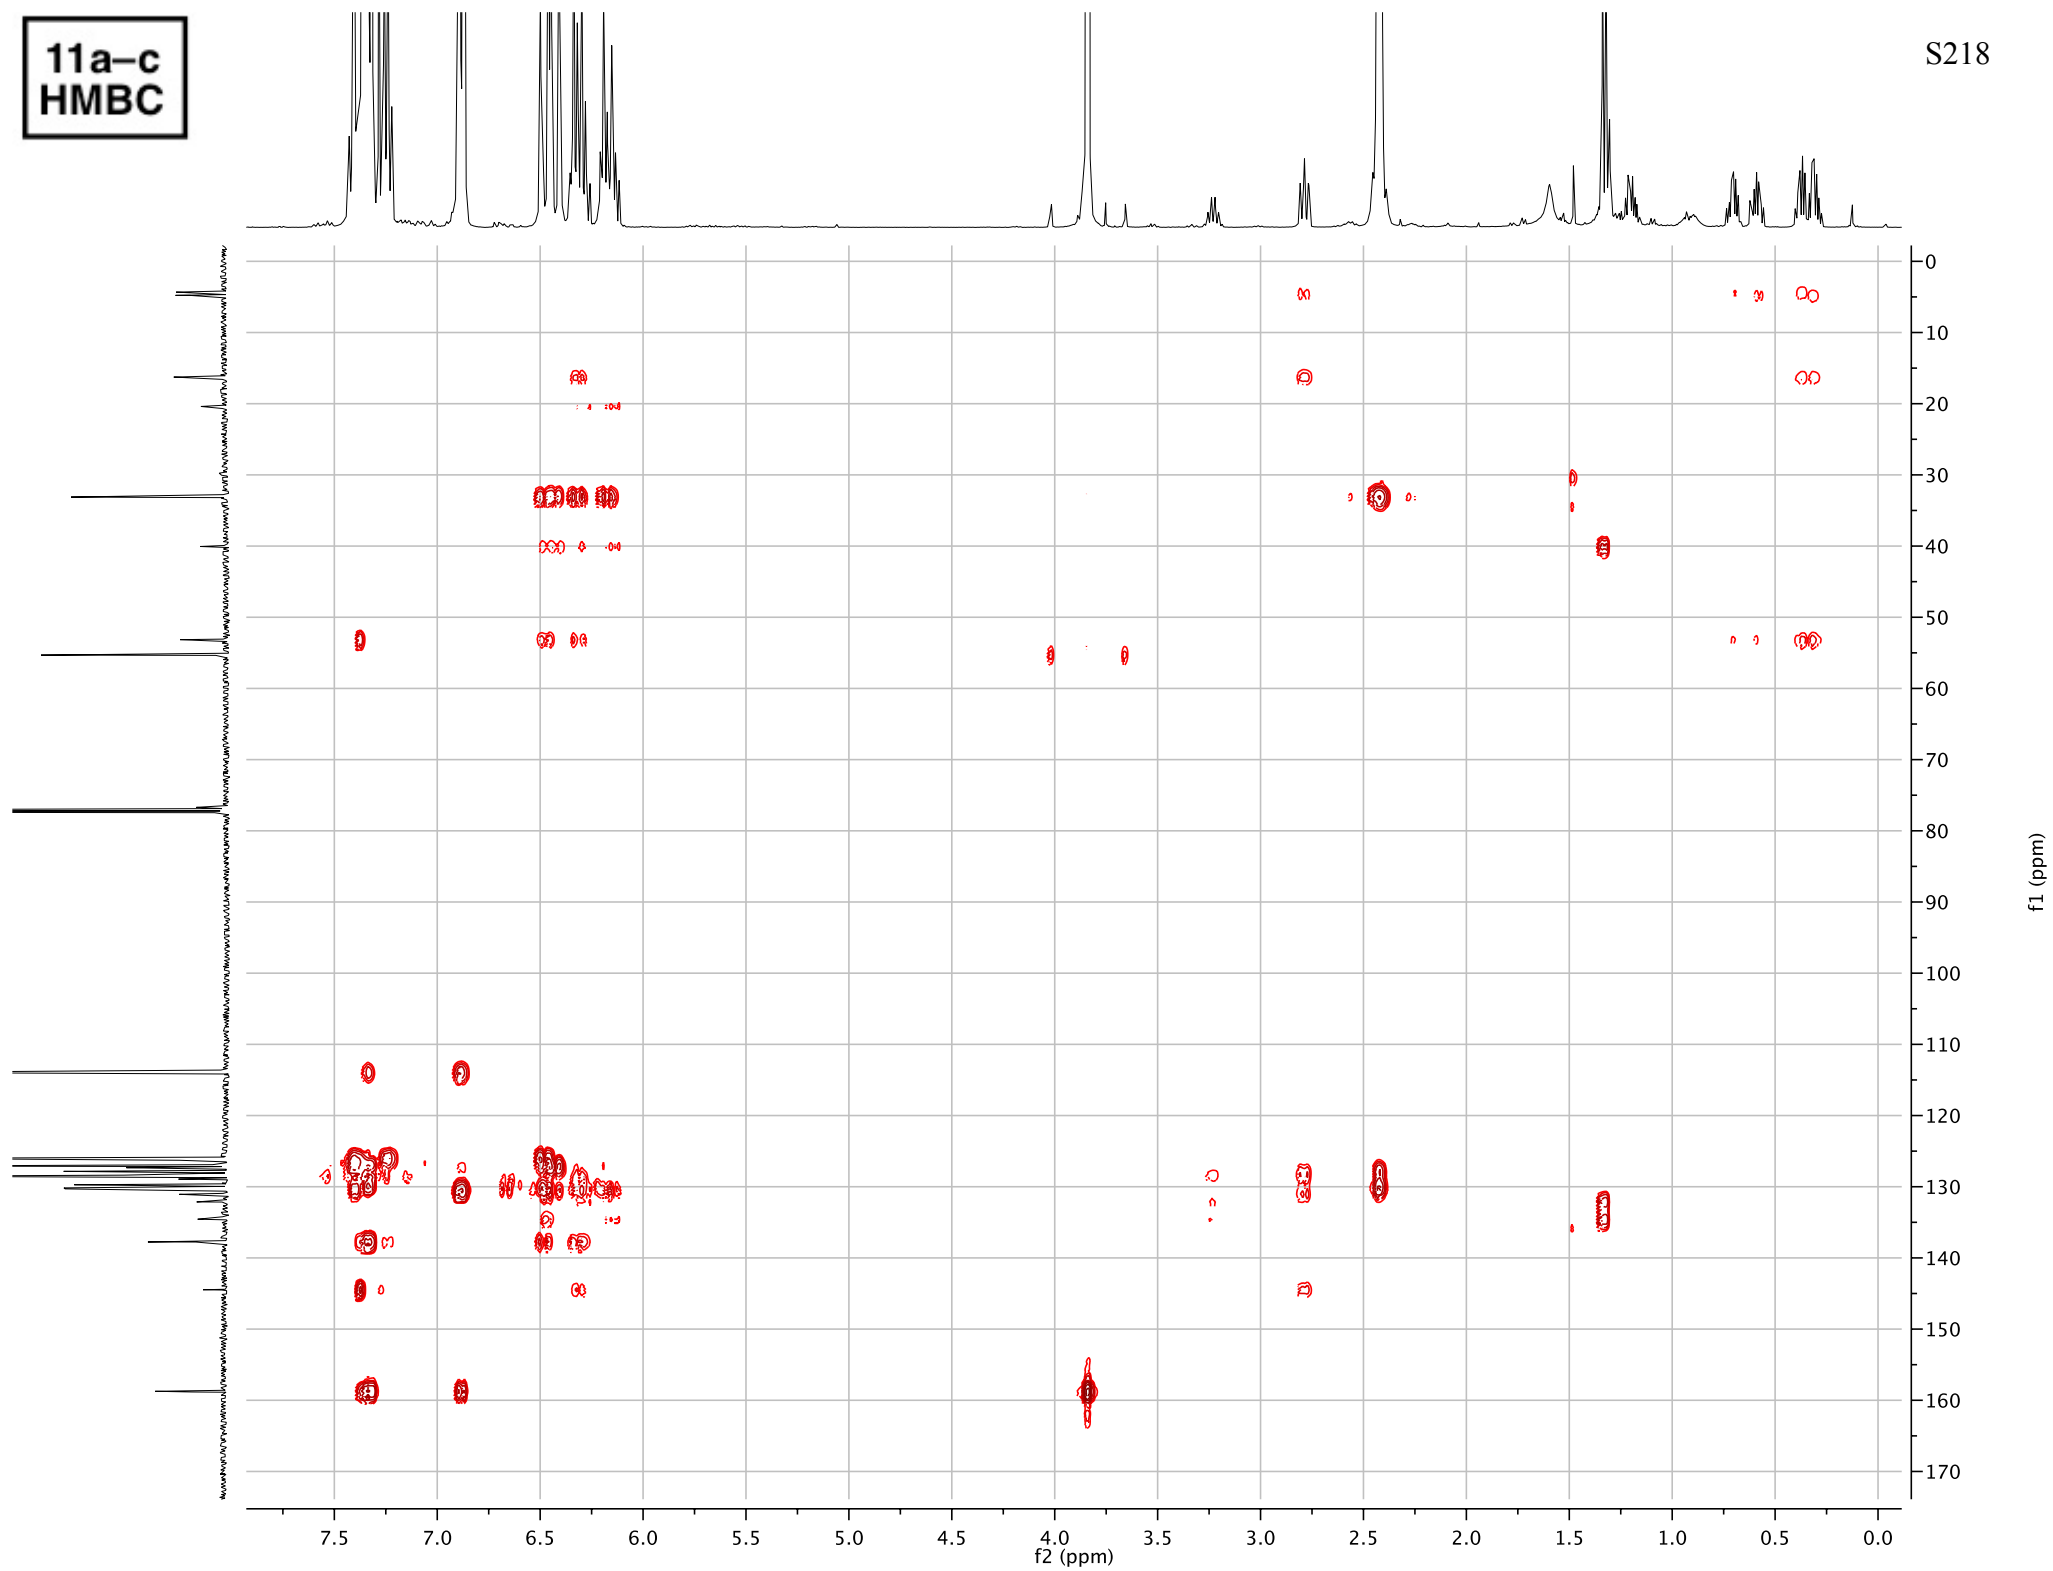

Supplement: NIHMS948256-supplement-Supplemental_Information.pdf [file NIHMS948256-supplement-Supplemental_Information.pdf]
